# Supplementary material for: A general approach for activity-based protein profiling of oxidoreductases with redox-differentiated diarylhalonium warheads
Source: Chem Sci. 2025 Mar 11;16(15):6240–56. doi: 10.1039/d4sc08454c (PMC11912224; doi:10.1039/d4sc08454c)
Supplement: SC-016-D4SC08454C-s002 [file SC-016-D4SC08454C-s002.xlsx]

## Sheet: LFQvalues
3aa	3ab	3ba	3bb	3da	3db	3ca	3cb	3ea	3eb	3ga	3gb	3fa	3fb	3ha	3ia	ctrl	C: Pfam	C: ANOVA Significant	N: -Log ANOVA p value	N: ANOVA q-value	T: Protein.Group	T: Protein.Ids	T: Protein.Names	T: Genes	T: First.Protein.Description	T: Significant pairs	T: Gene Ontology (biological process)	T: Gene Ontology (cellular component)	T: Gene Ontology (molecular function)	T: Gene Ontology (GO)	T: Gene Ontology IDs	T: EC number
12.3369	12.8477	12.3083	12.5366	12.3664	12.3706	12.21	12.1512	12.131	12.2074	12.1888	12.3739	12.0887	12.2845	12.0974	12.3681	12.3508	Peptidase_M3	+	8.13998	0	A6H611	A6H611	MIPEP_MOUSE	Mipep	Mitochondrial intermediate peptidase	3bb_3fa;3ab_3fa;3bb_3ha;3ab_3ha;3ab_3ea;3ab_3ga;3ab_3cb;3ab_3eb;3ab_3ca;3ab_3da;3ab_3ba;3ab_3aa;3ab_ctrl;3ab_3ia;3ab_3db;3ab_3gb;3ab_3fb	peptide metabolic process [GO:0006518];protein processing involved in protein targeting to mitochondrion [GO:0006627]	mitochondrial matrix [GO:0005759];mitochondrion [GO:0005739]	endopeptidase activity [GO:0004175];metal ion binding [GO:0046872];metalloendopeptidase activity [GO:0004222]	mitochondrial matrix [GO:0005759];mitochondrion [GO:0005739];endopeptidase activity [GO:0004175];metal ion binding [GO:0046872];metalloendopeptidase activity [GO:0004222];peptide metabolic process [GO:0006518];protein processing involved in protein targeting to mitochondrion [GO:0006627]	GO:0004175;GO:0004222;GO:0005739;GO:0005759;GO:0006518;GO:0006627;GO:0046872	3.4.24.59
14.5642	13.3288	14.4068	13.3334	14.8785	13.7227	14.6919	13.7692	13.7239	13.82	14.4821	13.767	14.2615	13.994	14.4706	14.4156	13.467	zf-CDGSH	+	3.5462	0.0290337	B1AR13	B1AR13	CISD3_MOUSE	Cisd3	CDGSH iron-sulfur domain-containing protein 3, mitochondrial		protein maturation by [2Fe-2S] cluster transfer [GO:0106034]	mitochondrion [GO:0005739]	2 iron, 2 sulfur cluster binding [GO:0051537];metal ion binding [GO:0046872]	mitochondrion [GO:0005739];2 iron, 2 sulfur cluster binding [GO:0051537];metal ion binding [GO:0046872];protein maturation by [2Fe-2S] cluster transfer [GO:0106034]	GO:0005739;GO:0046872;GO:0051537;GO:0106034
14.362	13.9376	14.1645	14.0295	14.0452	13.9223	13.86	13.982	13.9272	13.9337	14.3184	13.9931	14.1047	13.8928	14.3564	14.4186	14.0275	ApoB100_C;DUF1081;DUF1943;Vitellogenin_N	+	4.47758	0.00806061	E9Q414	E9Q414	APOB_MOUSE	Apob	Apolipoprotein B-100	3ia_3ea;3ia_3ab;3ia_3ca;3ia_3db;3ia_3fb;3ia_3gb;3ia_3fa	artery morphogenesis [GO:0048844];cellular response to prostaglandin stimulus [GO:0071379];cellular response to tumor necrosis factor [GO:0071356];cholesterol efflux [GO:0033344];cholesterol homeostasis [GO:0042632];cholesterol metabolic process [GO:0008203];cholesterol transport [GO:0030301];establishment of localization in cell [GO:0051649];fertilization [GO:0009566];flagellated sperm motility …	chylomicron [GO:0042627];cytoplasm [GO:0005737];cytosol [GO:0005829];endoplasmic reticulum [GO:0005783];endoplasmic reticulum exit site [GO:0070971];extracellular region [GO:0005576];extracellular space [GO:0005615];high-density lipoprotein particle [GO:0034364];intermediate-density lipoprotein particle [GO:0034363];intracellular membrane-bounded organelle [GO:0043231];lipid droplet [GO:0005811];…	cholesterol transfer activity [GO:0120020];heparin binding [GO:0008201];lipase binding [GO:0035473];low-density lipoprotein particle receptor binding [GO:0050750];phospholipid binding [GO:0005543]	chylomicron [GO:0042627];cytoplasm [GO:0005737];cytosol [GO:0005829];endoplasmic reticulum [GO:0005783];endoplasmic reticulum exit site [GO:0070971];extracellular region [GO:0005576];extracellular space [GO:0005615];high-density lipoprotein particle [GO:0034364];intermediate-density lipoprotein particle [GO:0034363];intracellular membrane-bounded organelle [GO:0043231];lipid droplet [GO:0005811];…	GO:0001701;GO:0005543;GO:0005576;GO:0005615;GO:0005737;GO:0005783;GO:0005811;GO:0005829;GO:0006629;GO:0006642;GO:0007283;GO:0007399;GO:0008201;GO:0008203;GO:0009566;GO:0009615;GO:0009743;GO:0009791;GO:0010269;GO:0010628;GO:0010744;GO:0010884;GO:0010886;GO:0012506;GO:0016042;GO:0019433;GO:0030301;GO:0030317;GO:0031983;GO:0032355;GO:0032496;GO:0033344;GO:0034359;GO:0034361;GO:0034362;GO:0034363;GO:…
17.0458	17.1183	17.2172	18.6489	16.9701	16.7692	16.7817	16.8239	16.9555	16.7	16.9018	16.8762	16.8089	17.4682	16.809	16.6679	16.8001	Pyr_redox;Pyr_redox_2;Pyr_redox_dim	+	6.86657	0.000210526	O08749	O08749	DLDH_MOUSE	Dld	Dihydrolipoyl dehydrogenase, mitochondrial	3bb_3ia;3bb_3eb;3bb_ctrl;3bb_3db;3bb_3fa;3bb_3ha;3bb_3gb;3bb_3ca;3bb_3cb;3bb_3ga;3bb_3da;3bb_3ea;3bb_3ab;3bb_3aa;3bb_3ba;3bb_3fb	2-oxoglutarate metabolic process [GO:0006103];acetyl-CoA biosynthetic process from pyruvate [GO:0006086];branched-chain amino acid catabolic process [GO:0009083];dihydrolipoamide metabolic process [GO:0051068];gastrulation [GO:0007369];histone succinylation [GO:0106077];lipoate metabolic process [GO:0009106];mitochondrial electron transport, NADH to ubiquinone [GO:0006120];proteolysis [GO:0006508…	acetyltransferase complex [GO:1902493];acrosomal matrix [GO:0043159];cilium [GO:0005929];dihydrolipoyl dehydrogenase complex [GO:0045240];mitochondrial alpha-ketoglutarate dehydrogenase complex [GO:0005947];mitochondrial matrix [GO:0005759];mitochondrial pyruvate dehydrogenase complex [GO:0005967];mitochondrion [GO:0005739];motile cilium [GO:0031514];myelin sheath [GO:0043209];nucleus [GO:0005634…	dihydrolipoyl dehydrogenase activity [GO:0004148];flavin adenine dinucleotide binding [GO:0050660];lipoamide binding [GO:0043544];NAD binding [GO:0051287];pyruvate dehydrogenase (NAD+) activity [GO:0034604]	acetyltransferase complex [GO:1902493];acrosomal matrix [GO:0043159];cilium [GO:0005929];dihydrolipoyl dehydrogenase complex [GO:0045240];mitochondrial alpha-ketoglutarate dehydrogenase complex [GO:0005947];mitochondrial matrix [GO:0005759];mitochondrial pyruvate dehydrogenase complex [GO:0005967];mitochondrion [GO:0005739];motile cilium [GO:0031514];myelin sheath [GO:0043209];nucleus [GO:0005634…	GO:0004148;GO:0005634;GO:0005739;GO:0005759;GO:0005929;GO:0005947;GO:0005967;GO:0006086;GO:0006103;GO:0006120;GO:0006508;GO:0007369;GO:0009083;GO:0009106;GO:0031514;GO:0034604;GO:0042391;GO:0043159;GO:0043209;GO:0043544;GO:0045240;GO:0045252;GO:0045254;GO:0048240;GO:0050660;GO:0051068;GO:0051287;GO:0106077;GO:1902493	1.8.1.4
14.1554	13.6522	14.0105	14.005	14.2799	13.9551	14.0817	13.8752	13.3392	13.2955	14.1845	13.9227	13.5829	13.9978	13.749	13.4783	13.0568	p450	+	7.44297	0	O09158	O09158	CP3AP_MOUSE	Cyp3a25	Cytochrome P450 3A25	3ab_ctrl;3db_ctrl;3cb_ctrl;3gb_ctrl;3ba_ctrl;3aa_ctrl;3fb_ctrl;3bb_ctrl;3ca_ctrl;3ga_ctrl;3da_ctrl;3aa_3eb;3fb_3eb;3bb_3eb;3ca_3eb;3ga_3eb;3da_3eb;3aa_3ea;3fb_3ea;3bb_3ea;3ca_3ea;3ga_3ea;3da_3ea;3da_3ia	oxidative demethylation [GO:0070989];response to bacterium [GO:0009617]	endoplasmic reticulum membrane [GO:0005789]	aromatase activity [GO:0070330];estrogen 16-alpha-hydroxylase activity [GO:0101020];estrogen 2-hydroxylase activity [GO:0101021];heme binding [GO:0020037];iron ion binding [GO:0005506];retinoic acid 4-hydroxylase activity [GO:0008401];steroid hydroxylase activity [GO:0008395];testosterone 16-alpha-hydroxylase activity [GO:0008390];testosterone 6-beta-hydroxylase activity [GO:0050649]	endoplasmic reticulum membrane [GO:0005789];aromatase activity [GO:0070330];estrogen 16-alpha-hydroxylase activity [GO:0101020];estrogen 2-hydroxylase activity [GO:0101021];heme binding [GO:0020037];iron ion binding [GO:0005506];retinoic acid 4-hydroxylase activity [GO:0008401];steroid hydroxylase activity [GO:0008395];testosterone 16-alpha-hydroxylase activity [GO:0008390];testosterone 6-beta-hy…	GO:0005506;GO:0005789;GO:0008390;GO:0008395;GO:0008401;GO:0009617;GO:0020037;GO:0050649;GO:0070330;GO:0070989;GO:0101020;GO:0101021	1.14.14.1
16.0962	15.5849	15.8349	15.7265	15.7584	15.7088	15.7476	15.6785	15.5	15.6142	15.9482	15.8092	15.8803	15.6243	16.1611	16.0238	15.628	AMP-binding;AMP-binding_C	+	8.01702	0	O35488	O35488	S27A2_MOUSE	Slc27a2	Long-chain fatty acid transport protein 2	3ga_3ea;3ia_3ea;3aa_3ea;3ha_3ea;3ga_3eb;3ia_3eb;3aa_3eb;3ha_3eb;3ga_3ab;3ia_3ab;3aa_3ab;3ha_3ab;3aa_3fb;3ha_3fb;3aa_3db;3ha_3db;3aa_3cb;3ha_3cb;3aa_ctrl;3ha_ctrl;3ha_3bb;3ha_3da;3ha_3ca;3ha_3ba;3ha_3gb;3ha_3fa	bile acid biosynthetic process [GO:0006699];fatty acid alpha-oxidation [GO:0001561];fatty acid beta-oxidation [GO:0006635];fatty acid transport [GO:0015908];long-chain fatty acid import into cell [GO:0044539];long-chain fatty acid metabolic process [GO:0001676];methyl-branched fatty acid metabolic process [GO:0097089];very long-chain fatty acid catabolic process [GO:0042760];very long-chain fatty…	endoplasmic reticulum [GO:0005783];endoplasmic reticulum lumen [GO:0005788];endoplasmic reticulum membrane [GO:0005789];intracellular membrane-bounded organelle [GO:0043231];mitochondrion [GO:0005739];peroxisomal membrane [GO:0005778];peroxisome [GO:0005777];plasma membrane [GO:0005886]	arachidonate-CoA ligase activity [GO:0047676];ATP binding [GO:0005524];cholate-CoA ligase activity [GO:0047747];enzyme binding [GO:0019899];fatty acid transmembrane transporter activity [GO:0015245];long-chain fatty acid transporter activity [GO:0005324];long-chain fatty acid-CoA ligase activity [GO:0004467];oleate transmembrane transporter activity [GO:1901480];phytanate-CoA ligase activity [GO:…	endoplasmic reticulum [GO:0005783];endoplasmic reticulum lumen [GO:0005788];endoplasmic reticulum membrane [GO:0005789];intracellular membrane-bounded organelle [GO:0043231];mitochondrion [GO:0005739];peroxisomal membrane [GO:0005778];peroxisome [GO:0005777];plasma membrane [GO:0005886];arachidonate-CoA ligase activity [GO:0047676];ATP binding [GO:0005524];cholate-CoA ligase activity [GO:0047747]…	GO:0000038;GO:0001561;GO:0001676;GO:0004467;GO:0005324;GO:0005524;GO:0005739;GO:0005777;GO:0005778;GO:0005783;GO:0005788;GO:0005789;GO:0005886;GO:0006635;GO:0006699;GO:0015245;GO:0015908;GO:0019899;GO:0031957;GO:0042760;GO:0043231;GO:0044539;GO:0047676;GO:0047747;GO:0050197;GO:0070251;GO:0097089;GO:1901480	6.2.1.-;6.2.1.15;6.2.1.24;6.2.1.3;6.2.1.7
17.4725	16.7134	17.5753	16.8259	16.6641	16.6512	16.6197	16.7	16.7568	16.665	17.6019	17.0351	16.7153	16.9402	18.3094	17.7356	16.5258	Aldedh	+	10.7429	0	O35945	O35945	AL1A7_MOUSE	Aldh1a7	Aldehyde dehydrogenase, cytosolic 1	3ia_ctrl;3aa_ctrl;3ba_ctrl;3ga_ctrl;3ha_ctrl;3ia_3cb;3aa_3cb;3ba_3cb;3ga_3cb;3ha_3cb;3aa_3ca;3ba_3ca;3ga_3ca;3ha_3ca;3aa_3db;3ba_3db;3ga_3db;3ha_3db;3ba_3eb;3ga_3eb;3ha_3eb;3ba_3da;3ga_3da;3ha_3da;3ba_3ea;3ga_3ea;3ha_3ea;3ba_3ab;3ga_3ab;3ha_3ab;3ba_3fa;3ga_3fa;3ha_3fa;3ba_3bb;3ga_3bb;3ha_3bb;3ha_3gb;3ha_3fb	cellular detoxification of aldehyde [GO:0110095];ethanol catabolic process [GO:0006068];fructosamine catabolic process [GO:0030392];fructose catabolic process [GO:0006001]	cytosol [GO:0005829]	3-chloroallyl aldehyde dehydrogenase activity [GO:0004028];3-deoxyglucosone dehydrogenase activity [GO:0106373];aldehyde dehydrogenase (NAD+) activity [GO:0004029];benzaldehyde dehydrogenase (NAD+) activity [GO:0018479];glyceraldehyde-3-phosphate dehydrogenase (NAD+) (non-phosphorylating) activity [GO:0043878];identical protein binding [GO:0042802]	cytosol [GO:0005829];3-chloroallyl aldehyde dehydrogenase activity [GO:0004028];3-deoxyglucosone dehydrogenase activity [GO:0106373];aldehyde dehydrogenase (NAD+) activity [GO:0004029];benzaldehyde dehydrogenase (NAD+) activity [GO:0018479];glyceraldehyde-3-phosphate dehydrogenase (NAD+) (non-phosphorylating) activity [GO:0043878];identical protein binding [GO:0042802];cellular detoxification of …	GO:0004028;GO:0004029;GO:0005829;GO:0006001;GO:0006068;GO:0018479;GO:0030392;GO:0042802;GO:0043878;GO:0106373;GO:0110095	1.2.1.3
14.7844	14.9226	15.1988	15.4917	15.2993	15.1063	14.9644	15.01	14.8193	13.9212	15.327	15.4434	15.1883	15.5673	14.3526	13.9642	13.9158	Ald_Xan_dh_C;Ald_Xan_dh_C2;CO_deh_flav_C;FAD_binding_5;Fer2;Fer2_2	+	7.23067	0	O54754	O54754	AOXA_MOUSE	Aox1	Aldehyde oxidase 1	3fa_ctrl;3db_ctrl;3ba_ctrl;3bb_ctrl;3da_ctrl;3ga_ctrl;3fb_ctrl;3gb_ctrl;3fa_3ia;3db_3ia;3ba_3ia;3bb_3ia;3da_3ia;3ga_3ia;3fb_3ia;3gb_3ia;3db_3eb;3ba_3eb;3bb_3eb;3da_3eb;3ga_3eb;3fb_3eb;3gb_3eb;3fb_3ha;3gb_3ha	lipid metabolic process [GO:0006629];xenobiotic metabolic process [GO:0006805]	cytosol [GO:0005829]	2 iron, 2 sulfur cluster binding [GO:0051537];aldehyde oxidase activity [GO:0004031];electron transfer activity [GO:0009055];FAD binding [GO:0071949];flavin adenine dinucleotide binding [GO:0050660];identical protein binding [GO:0042802];iron ion binding [GO:0005506];molybdopterin cofactor binding [GO:0043546];NAD binding [GO:0051287];protein homodimerization activity [GO:0042803]	cytosol [GO:0005829];2 iron, 2 sulfur cluster binding [GO:0051537];aldehyde oxidase activity [GO:0004031];electron transfer activity [GO:0009055];FAD binding [GO:0071949];flavin adenine dinucleotide binding [GO:0050660];identical protein binding [GO:0042802];iron ion binding [GO:0005506];molybdopterin cofactor binding [GO:0043546];NAD binding [GO:0051287];protein homodimerization activity [GO:004…	GO:0004031;GO:0005506;GO:0005829;GO:0006629;GO:0006805;GO:0009055;GO:0042802;GO:0042803;GO:0043546;GO:0050660;GO:0051287;GO:0051537;GO:0071949	1.17.3.-;1.2.3.1
14.8101	13.7309	14.2048	13.9594	13.8154	13.8878	13.7965	13.8627	13.5837	13.796	13.9654	13.7814	13.9135	13.6498	14.473	14.0476	13.5129	adh_short	+	7.36977	0	O54909	O54909	RDH16_MOUSE	Rdh16	Retinol dehydrogenase 16	3ha_3ea;3aa_3ea;3ha_ctrl;3aa_ctrl;3aa_3fb;3aa_3da;3aa_3ab;3aa_3eb;3aa_3ca;3aa_3db;3aa_3gb;3aa_3cb;3aa_3fa;3aa_3bb;3aa_3ga;3aa_3ia;3aa_3ba	9-cis-retinoic acid biosynthetic process [GO:0042904];positive regulation of retinoic acid biosynthetic process [GO:1900054];retinoic acid metabolic process [GO:0042573];retinoid metabolic process [GO:0001523];retinol metabolic process [GO:0042572];steroid metabolic process [GO:0008202]	endoplasmic reticulum lumen [GO:0005788];endoplasmic reticulum membrane [GO:0005789];intracellular membrane-bounded organelle [GO:0043231];organelle membrane [GO:0031090]	11-cis-retinol dehydrogenase [GO:0106429];androstan-3-alpha,17-beta-diol dehydrogenase activity [GO:0047044];androsterone dehydrogenase activity [GO:0047023];identical protein binding [GO:0042802];NAD-retinol dehydrogenase activity [GO:0004745]	endoplasmic reticulum lumen [GO:0005788];endoplasmic reticulum membrane [GO:0005789];intracellular membrane-bounded organelle [GO:0043231];organelle membrane [GO:0031090];11-cis-retinol dehydrogenase [GO:0106429];androstan-3-alpha,17-beta-diol dehydrogenase activity [GO:0047044];androsterone dehydrogenase activity [GO:0047023];identical protein binding [GO:0042802];NAD-retinol dehydrogenase activ…	GO:0001523;GO:0004745;GO:0005788;GO:0005789;GO:0008202;GO:0031090;GO:0042572;GO:0042573;GO:0042802;GO:0042904;GO:0043231;GO:0047023;GO:0047044;GO:0106429;GO:1900054	1.1.1.105;1.1.1.209;1.1.1.315;1.1.1.53
13.1637	13.1114	13.0388	13.2234	13.1818	13.0891	13.1861	13.126	12.9209	13.1361	13.6035	13.1439	13.6988	13.3872	15.3061	13.5756	13.1863	NNMT_PNMT_TEMT	+	5.93979	0.00130612	O55239	O55239	NNMT_MOUSE	Nnmt	Nicotinamide N-methyltransferase	3ha_3eb;3ha_3gb;3ha_3ea;3ha_3ba;3ha_3db;3ha_3ab;3ha_3cb;3ha_3da;3ha_ctrl;3ha_3aa;3ha_3bb;3ha_3ca;3ha_3fb;3ha_3ga;3ha_3ia;3ha_3fa	animal organ regeneration [GO:0031100];methylation [GO:0032259];nicotinamide metabolic process [GO:0006769];positive regulation of gluconeogenesis [GO:0045722];positive regulation of protein deacetylation [GO:0090312];regulation of histone methylation [GO:0031060];response to organonitrogen compound [GO:0010243];response to xenobiotic stimulus [GO:0009410]	cytosol [GO:0005829]	nicotinamide N-methyltransferase activity [GO:0008112]	cytosol [GO:0005829];nicotinamide N-methyltransferase activity [GO:0008112];animal organ regeneration [GO:0031100];methylation [GO:0032259];nicotinamide metabolic process [GO:0006769];positive regulation of gluconeogenesis [GO:0045722];positive regulation of protein deacetylation [GO:0090312];regulation of histone methylation [GO:0031060];response to organonitrogen compound [GO:0010243];response …	GO:0005829;GO:0006769;GO:0008112;GO:0009410;GO:0010243;GO:0031060;GO:0031100;GO:0032259;GO:0045722;GO:0090312	2.1.1.1
12.6634	12.5067	12.4741	12.8564	12.6263	12.4628	12.6134	12.6347	12.6623	12.3733	12.9024	12.6837	12.5399	12.6016	13.7766	13.1575	12.5453	ERG2_Sigma1R	+	6.60728	0.000571429	O55242	O55242	SGMR1_MOUSE	Sigmar1	Sigma non-opioid intracellular receptor 1	3ha_3eb;3ha_3fa;3ha_3ca;3ha_3da;3ha_3ea;3ha_3gb;3ha_3ab;3ha_3ba;3ha_ctrl;3ha_3db;3ha_3cb;3ha_3fb;3ha_3aa;3ha_3bb;3ha_3ga	cell death in response to hydrogen peroxide [GO:0036474];lipid transport [GO:0006869];nervous system development [GO:0007399];protein homotrimerization [GO:0070207];regulation of neuron apoptotic process [GO:0043523]	anchoring junction [GO:0070161];cytoplasmic vesicle [GO:0031410];endoplasmic reticulum [GO:0005783];endoplasmic reticulum membrane [GO:0005789];growth cone [GO:0030426];lipid droplet [GO:0005811];membrane [GO:0016020];nuclear envelope [GO:0005635];nuclear inner membrane [GO:0005637];nuclear outer membrane [GO:0005640];postsynaptic density [GO:0014069];postsynaptic density membrane [GO:0098839]	G protein-coupled opioid receptor activity [GO:0004985];identical protein binding [GO:0042802];signaling receptor activity [GO:0038023]	anchoring junction [GO:0070161];cytoplasmic vesicle [GO:0031410];endoplasmic reticulum [GO:0005783];endoplasmic reticulum membrane [GO:0005789];growth cone [GO:0030426];lipid droplet [GO:0005811];membrane [GO:0016020];nuclear envelope [GO:0005635];nuclear inner membrane [GO:0005637];nuclear outer membrane [GO:0005640];postsynaptic density [GO:0014069];postsynaptic density membrane [GO:0098839];G …	GO:0004985;GO:0005635;GO:0005637;GO:0005640;GO:0005783;GO:0005789;GO:0005811;GO:0006869;GO:0007399;GO:0014069;GO:0016020;GO:0030426;GO:0031410;GO:0036474;GO:0038023;GO:0042802;GO:0043523;GO:0070161;GO:0070207;GO:0098839
14.3353	13.1683	13.9462	13.7668	14.244	13.287	14.2511	13.6602	12.9146	12.7838	14.2483	13.6884	13.8355	13.5922	14.463	14.0701	12.8861	Heme_oxygenase	+	5.91137	0.00128	O70252	O70252	HMOX2_MOUSE	Hmox2	Heme oxygenase 2	3ca_3eb;3da_3eb;3ga_3eb;3ha_3eb;3aa_3eb;3ca_3ea;3da_3ea;3ga_3ea;3ha_3ea;3aa_3ea;3ca_ctrl;3da_ctrl;3ga_ctrl;3ha_ctrl;3aa_ctrl	heme catabolic process [GO:0042167];heme oxidation [GO:0006788];response to hypoxia [GO:0001666];response to oxidative stress [GO:0006979]	endoplasmic reticulum membrane [GO:0005789];plasma membrane [GO:0005886]	heme binding [GO:0020037];heme oxygenase (decyclizing) activity [GO:0004392];metal ion binding [GO:0046872]	endoplasmic reticulum membrane [GO:0005789];plasma membrane [GO:0005886];heme binding [GO:0020037];heme oxygenase (decyclizing) activity [GO:0004392];metal ion binding [GO:0046872];heme catabolic process [GO:0042167];heme oxidation [GO:0006788];response to hypoxia [GO:0001666];response to oxidative stress [GO:0006979]	GO:0001666;GO:0004392;GO:0005789;GO:0005886;GO:0006788;GO:0006979;GO:0020037;GO:0042167;GO:0046872	1.14.14.18
19.8139	18.2291	18.3157	17.6761	17.375	17.3848	17.4805	17.3089	17.2208	17.355	17.7221	17.4186	17.3599	17.3324	18.0647	18.5261	17.2794	adh_short	+	22.3419	0	O88451	O88451;Q9R092	RDH7_MOUSE	Rdh7	Retinol dehydrogenase 7	3ha_ctrl;3ab_ctrl;3ba_ctrl;3ia_ctrl;3aa_ctrl;3ha_3ea;3ab_3ea;3ba_3ea;3ia_3ea;3aa_3ea;3ha_3cb;3ab_3cb;3ba_3cb;3ia_3cb;3aa_3cb;3ha_3db;3ab_3db;3ba_3db;3ia_3db;3aa_3db;3ha_3fb;3ab_3fb;3ba_3fb;3ia_3fb;3aa_3fb;3ab_3eb;3ba_3eb;3ia_3eb;3aa_3eb;3ab_3da;3ba_3da;3ia_3da;3aa_3da;3ab_3fa;3ba_3fa;3ia_3fa;3aa_3fa;3ab_3gb;3ba_3gb;3ia_3gb;3aa_3gb;3ab_3ca;3ba_3ca;3ia_3ca;3aa_3ca;3aa_3bb;3aa_3ga;3aa_3ha;3aa_3ab;3a…	retinol metabolic process [GO:0042572];steroid metabolic process [GO:0008202]	endoplasmic reticulum [GO:0005783];intracellular membrane-bounded organelle [GO:0043231]	androstan-3-alpha,17-beta-diol dehydrogenase activity [GO:0047044];androsterone dehydrogenase activity [GO:0047023];catalytic activity [GO:0003824];NAD-retinol dehydrogenase activity [GO:0004745]	endoplasmic reticulum [GO:0005783];intracellular membrane-bounded organelle [GO:0043231];androstan-3-alpha,17-beta-diol dehydrogenase activity [GO:0047044];androsterone dehydrogenase activity [GO:0047023];catalytic activity [GO:0003824];NAD-retinol dehydrogenase activity [GO:0004745];retinol metabolic process [GO:0042572];steroid metabolic process [GO:0008202]	GO:0003824;GO:0004745;GO:0005783;GO:0008202;GO:0042572;GO:0043231;GO:0047023;GO:0047044	1.1.1.105
16.5339	16.5624	16.5481	16.5706	17.0137	16.6825	16.4403	16.5265	16.4523	16.5198	16.4661	16.6477	16.2906	16.5316	16.2966	16.4671	16.6798	Ferrochelatase	+	3.66468	0.024092	P22315	P22315	HEMH_MOUSE	Fech	Ferrochelatase, mitochondrial	3da_3ha;3da_3fa;3da_3ca;3da_3eb;3da_3cb;3da_3ia;3da_3ga;3da_3gb;3da_3fb;3da_3aa;3da_3ba;3da_3ea;3da_3db;3da_3ab;3da_3bb	cholesterol metabolic process [GO:0008203];detection of UV [GO:0009589];erythrocyte differentiation [GO:0030218];heme biosynthetic process [GO:0006783];multicellular organismal-level iron ion homeostasis [GO:0060586];porphyrin-containing compound biosynthetic process [GO:0006779];protoporphyrinogen IX metabolic process [GO:0046501];regulation of eIF2 alpha phosphorylation by heme [GO:0010999];reg…	mitochondrial inner membrane [GO:0005743];mitochondrion [GO:0005739]	2 iron, 2 sulfur cluster binding [GO:0051537];ferrochelatase activity [GO:0004325];heme binding [GO:0020037];iron ion binding [GO:0005506];iron-responsive element binding [GO:0030350];protein homodimerization activity [GO:0042803];tetrapyrrole binding [GO:0046906]	mitochondrial inner membrane [GO:0005743];mitochondrion [GO:0005739];2 iron, 2 sulfur cluster binding [GO:0051537];ferrochelatase activity [GO:0004325];heme binding [GO:0020037];iron ion binding [GO:0005506];iron-responsive element binding [GO:0030350];protein homodimerization activity [GO:0042803];tetrapyrrole binding [GO:0046906];cholesterol metabolic process [GO:0008203];detection of UV [GO:00…	GO:0004325;GO:0005506;GO:0005739;GO:0005743;GO:0006779;GO:0006783;GO:0008203;GO:0009416;GO:0009589;GO:0010468;GO:0010999;GO:0020037;GO:0030218;GO:0030350;GO:0034379;GO:0042803;GO:0046501;GO:0046906;GO:0046984;GO:0051537;GO:0060586	4.98.1.1
19.0823	18.6992	19.0784	19.4058	20.1823	19.3947	20.5908	20.0821	18.4932	18.3399	19.9454	19.7365	19.6777	20.0559	19.6402	19.7716	18.26	p450	+	9.56824	0	P24456	P24456	CP2DA_MOUSE	Cyp2d10	Cytochrome P450 2D10	3fa_ctrl;3gb_ctrl;3ia_ctrl;3ha_ctrl;3cb_ctrl;3fb_ctrl;3ga_ctrl;3da_ctrl;3ca_ctrl;3ia_3eb;3ha_3eb;3cb_3eb;3fb_3eb;3ga_3eb;3da_3eb;3ca_3eb;3cb_3ea;3fb_3ea;3ga_3ea;3da_3ea;3ca_3ea;3fb_3ab;3ga_3ab;3da_3ab;3ca_3ab;3ca_3aa;3ca_3ba	arachidonic acid metabolic process [GO:0019369];xenobiotic metabolic process [GO:0006805]	cytoplasm [GO:0005737];endoplasmic reticulum membrane [GO:0005789];intracellular membrane-bounded organelle [GO:0043231];mitochondrion [GO:0005739]	anandamide 11,12 epoxidase activity [GO:0062188];anandamide 14,15 epoxidase activity [GO:0062189];anandamide 8,9 epoxidase activity [GO:0062187];aromatase activity [GO:0070330];heme binding [GO:0020037];iron ion binding [GO:0005506];monooxygenase activity [GO:0004497];oxidoreductase activity [GO:0016491];oxidoreductase activity, acting on paired donors, with incorporation or reduction of molecula…	cytoplasm [GO:0005737];endoplasmic reticulum membrane [GO:0005789];intracellular membrane-bounded organelle [GO:0043231];mitochondrion [GO:0005739];anandamide 11,12 epoxidase activity [GO:0062188];anandamide 14,15 epoxidase activity [GO:0062189];anandamide 8,9 epoxidase activity [GO:0062187];aromatase activity [GO:0070330];heme binding [GO:0020037];iron ion binding [GO:0005506];monooxygenase acti…	GO:0004497;GO:0005506;GO:0005737;GO:0005739;GO:0005789;GO:0006805;GO:0016491;GO:0016712;GO:0019369;GO:0020037;GO:0043231;GO:0062187;GO:0062188;GO:0062189;GO:0070330	1.14.14.1
13.3561	13.0897	13.4501	13.7343	13.9961	13.3742	13.7299	13.4744	12.8129	12.9016	13.984	13.8325	13.3393	13.692	13.4897	13.5992	12.9444	p450	+	3.9652	0.0162133	P24457	P24457	CP2DB_MOUSE	Cyp2d11	Cytochrome P450 2D11	3da_ctrl;3ga_ctrl;3da_3ea;3ga_3ea;3da_3eb;3ga_3eb;3ga_3ab	arachidonic acid metabolic process [GO:0019369];xenobiotic metabolic process [GO:0006805]	cytoplasm [GO:0005737];endoplasmic reticulum membrane [GO:0005789];intracellular membrane-bounded organelle [GO:0043231];mitochondrion [GO:0005739]	anandamide 11,12 epoxidase activity [GO:0062188];anandamide 14,15 epoxidase activity [GO:0062189];anandamide 8,9 epoxidase activity [GO:0062187];aromatase activity [GO:0070330];heme binding [GO:0020037];iron ion binding [GO:0005506];monooxygenase activity [GO:0004497];oxidoreductase activity [GO:0016491];oxidoreductase activity, acting on paired donors, with incorporation or reduction of molecula…	cytoplasm [GO:0005737];endoplasmic reticulum membrane [GO:0005789];intracellular membrane-bounded organelle [GO:0043231];mitochondrion [GO:0005739];anandamide 11,12 epoxidase activity [GO:0062188];anandamide 14,15 epoxidase activity [GO:0062189];anandamide 8,9 epoxidase activity [GO:0062187];aromatase activity [GO:0070330];heme binding [GO:0020037];iron ion binding [GO:0005506];monooxygenase acti…	GO:0004497;GO:0005506;GO:0005737;GO:0005739;GO:0005789;GO:0006805;GO:0016491;GO:0016712;GO:0019369;GO:0020037;GO:0043231;GO:0062187;GO:0062188;GO:0062189;GO:0070330	1.14.14.1
19.3337	19.1949	18.9475	19.0055	18.9519	18.8318	19.0141	18.9532	19.0358	18.9906	18.974	18.9757	19.0241	19.0042	19.8291	19.0204	18.8623	Aldedh	+	4.99162	0.0040678	P24549	P24549	AL1A1_MOUSE	Aldh1a1	Aldehyde dehydrogenase 1A1	3ha_3db;3ha_ctrl;3ha_3cb;3ha_3gb;3ha_3da;3ha_3eb;3ha_3fa;3ha_3ca;3ha_3ea;3ha_3bb;3ha_3ba;3ha_3fb;3ha_3ia;3ha_3ga;3ha_3ab;3ha_3aa	9-cis-retinoic acid biosynthetic process [GO:0042904];9-cis-retinoic acid metabolic process [GO:0042905];apoptotic process [GO:0006915];cellular detoxification of aldehyde [GO:0110095];embryonic eye morphogenesis [GO:0048048];fructosamine catabolic process [GO:0030392];fructose catabolic process [GO:0006001];gamma-aminobutyric acid biosynthetic process [GO:0009449];maintenance of lens transparenc…	axon [GO:0030424];cytoplasm [GO:0005737];cytosol [GO:0005829];nucleus [GO:0005634];synapse [GO:0045202]	3-chloroallyl aldehyde dehydrogenase activity [GO:0004028];3-deoxyglucosone dehydrogenase activity [GO:0106373];aldehyde dehydrogenase (NAD+) activity [GO:0004029];aminobutyraldehyde dehydrogenase activity [GO:0019145];benzaldehyde dehydrogenase (NAD+) activity [GO:0018479];glyceraldehyde-3-phosphate dehydrogenase (NAD+) (non-phosphorylating) activity [GO:0043878];identical protein binding [GO:00…	axon [GO:0030424];cytoplasm [GO:0005737];cytosol [GO:0005829];nucleus [GO:0005634];synapse [GO:0045202];3-chloroallyl aldehyde dehydrogenase activity [GO:0004028];3-deoxyglucosone dehydrogenase activity [GO:0106373];aldehyde dehydrogenase (NAD+) activity [GO:0004029];aminobutyraldehyde dehydrogenase activity [GO:0019145];benzaldehyde dehydrogenase (NAD+) activity [GO:0018479];glyceraldehyde-3-pho…	GO:0001523;GO:0001758;GO:0002072;GO:0002138;GO:0004028;GO:0004029;GO:0005634;GO:0005737;GO:0005829;GO:0006001;GO:0006915;GO:0006979;GO:0009410;GO:0009449;GO:0018479;GO:0019145;GO:0030392;GO:0030424;GO:0036438;GO:0042572;GO:0042573;GO:0042802;GO:0042904;GO:0042905;GO:0043065;GO:0043878;GO:0045202;GO:0045471;GO:0048048;GO:0051287;GO:0106373;GO:0110095;GO:0120163	1.2.1.19;1.2.1.28;1.2.1.3;1.2.1.36
15.3136	15.7549	15.3431	16.0758	15.0665	15.0193	15.0396	15.1017	14.8378	14.8922	15.6069	15.2848	15.3625	15.193	15.2575	15.3079	15.0233	FAD_binding_1;Flavodoxin_1;NAD_binding_1	+	4.93996	0.00406667	P37040	P37040	NCPR_MOUSE	Por	NADPH--cytochrome P450 reductase	3ga_3ea;3ab_3ea;3bb_3ea;3bb_3eb;3bb_3da;3bb_ctrl;3bb_3ca;3bb_3cb;3bb_3db;3bb_3ha;3bb_3fa;3bb_3fb;3bb_3ia	carnitine metabolic process [GO:0009437];cellular organofluorine metabolic process [GO:0090346];cellular response to follicle-stimulating hormone stimulus [GO:0071372];cellular response to peptide hormone stimulus [GO:0071375];demethylation [GO:0070988];electron transport chain [GO:0022900];fatty acid oxidation [GO:0019395];flavonoid metabolic process [GO:0009812];internal peptidyl-lysine acetyla…	cytosol [GO:0005829];endoplasmic reticulum membrane [GO:0005789];intracellular membrane-bounded organelle [GO:0043231];membrane [GO:0016020];mitochondrion [GO:0005739]	cytochrome-b5 reductase activity, acting on NAD(P)H [GO:0004128];electron transfer activity [GO:0009055];enzyme binding [GO:0019899];flavin adenine dinucleotide binding [GO:0050660];FMN binding [GO:0010181];hydrolase activity [GO:0016787];iron-cytochrome-c reductase activity [GO:0047726];NADP binding [GO:0050661];NADPH-hemoprotein reductase activity [GO:0003958];nitric oxide dioxygenase activity …	cytosol [GO:0005829];endoplasmic reticulum membrane [GO:0005789];intracellular membrane-bounded organelle [GO:0043231];membrane [GO:0016020];mitochondrion [GO:0005739];cytochrome-b5 reductase activity, acting on NAD(P)H [GO:0004128];electron transfer activity [GO:0009055];enzyme binding [GO:0019899];flavin adenine dinucleotide binding [GO:0050660];FMN binding [GO:0010181];hydrolase activity [GO:0…	GO:0003420;GO:0003958;GO:0004128;GO:0005739;GO:0005789;GO:0005829;GO:0007584;GO:0008941;GO:0009055;GO:0009410;GO:0009437;GO:0009725;GO:0009812;GO:0010181;GO:0016020;GO:0016491;GO:0016787;GO:0018393;GO:0019395;GO:0019899;GO:0022900;GO:0032332;GO:0032770;GO:0043066;GO:0043154;GO:0043231;GO:0043602;GO:0045542;GO:0045880;GO:0046210;GO:0047726;GO:0050660;GO:0050661;GO:0060192;GO:0070988;GO:0071372;GO:…	1.6.2.4
16.0575	16.2184	16.0741	16.13	16.1333	16.06	16.0761	15.863	16.2171	16.0311	16.1136	16.527	16.1463	17.4017	16.6467	16.1994	16.0517	HMGL-like	+	10.2982	0	P38060	P38060	HMGCL_MOUSE	Hmgcl	Hydroxymethylglutaryl-CoA lyase, mitochondrial	3gb_3cb;3ha_3cb;3fb_3cb;3gb_3db;3ha_3db;3fb_3db;3gb_3eb;3ha_3eb;3fb_3eb;3ha_ctrl;3fb_ctrl;3fb_3ia;3fb_3ca;3fb_3ba;3fb_3bb;3fb_3aa;3fb_3da;3fb_3ga;3fb_3fa;3fb_3ea;3fb_3ab;3fb_3gb	acyl-CoA metabolic process [GO:0006637];ketone body biosynthetic process [GO:0046951];leucine catabolic process [GO:0006552];lipid metabolic process [GO:0006629];mitochondrion organization [GO:0007005]	mitochondrial inner membrane [GO:0005743];mitochondrial matrix [GO:0005759];mitochondrion [GO:0005739];peroxisome [GO:0005777];protein-containing complex [GO:0032991]	carboxylic acid binding [GO:0031406];fatty-acyl-CoA binding [GO:0000062];hydroxymethylglutaryl-CoA lyase activity [GO:0004419];magnesium ion binding [GO:0000287];manganese ion binding [GO:0030145];metal ion binding [GO:0046872];structural molecule activity [GO:0005198]	mitochondrial inner membrane [GO:0005743];mitochondrial matrix [GO:0005759];mitochondrion [GO:0005739];peroxisome [GO:0005777];protein-containing complex [GO:0032991];carboxylic acid binding [GO:0031406];fatty-acyl-CoA binding [GO:0000062];hydroxymethylglutaryl-CoA lyase activity [GO:0004419];magnesium ion binding [GO:0000287];manganese ion binding [GO:0030145];metal ion binding [GO:0046872];stru…	GO:0000062;GO:0000287;GO:0004419;GO:0005198;GO:0005739;GO:0005743;GO:0005759;GO:0005777;GO:0006552;GO:0006629;GO:0006637;GO:0007005;GO:0030145;GO:0031406;GO:0032991;GO:0046872;GO:0046951	4.1.3.4
15.3438	15.1638	15.0566	15.2011	15.1256	15.07	15.2496	15.1522	15.0848	15.104	15.2501	15.3604	15.2755	16.5411	16.491	15.3906	15.0036	Aldedh	+	12.5189	0	P47740	P47740	AL3A2_MOUSE	Aldh3a2	Aldehyde dehydrogenase family 3 member A2	3ha_3ea;3fb_3ea;3ha_3eb;3fb_3eb;3ha_ctrl;3fb_ctrl;3ha_3db;3fb_3db;3ha_3da;3fb_3da;3ha_3ba;3fb_3ba;3ha_3ca;3fb_3ca;3ha_3bb;3fb_3bb;3ha_3cb;3fb_3cb;3ha_3ab;3fb_3ab;3ha_3fa;3fb_3fa;3ha_3ga;3fb_3ga;3ha_3aa;3fb_3aa;3ha_3gb;3fb_3gb;3ha_3ia;3fb_3ia	cellular aldehyde metabolic process [GO:0006081];central nervous system development [GO:0007417];epidermis development [GO:0008544];fatty acid metabolic process [GO:0006631];formaldehyde metabolic process [GO:0046292];hexadecanal metabolic process [GO:0046458];peripheral nervous system development [GO:0007422];phytol metabolic process [GO:0033306];response to reactive oxygen species [GO:0000302];…	cytoplasm [GO:0005737];cytosol [GO:0005829];endoplasmic reticulum [GO:0005783];endoplasmic reticulum membrane [GO:0005789];intracellular membrane-bounded organelle [GO:0043231];membrane [GO:0016020];mitochondrial inner membrane [GO:0005743];mitochondrion [GO:0005739];nucleus [GO:0005634];peroxisome [GO:0005777]	3-chloroallyl aldehyde dehydrogenase activity [GO:0004028];aldehyde dehydrogenase (NAD+) activity [GO:0004029];glyceraldehyde-3-phosphate dehydrogenase (NAD+) (non-phosphorylating) activity [GO:0043878];long-chain-alcohol oxidase activity [GO:0046577];long-chain-aldehyde dehydrogenase activity [GO:0050061];medium-chain-aldehyde dehydrogenase activity [GO:0052814];protein homodimerization activity…	cytoplasm [GO:0005737];cytosol [GO:0005829];endoplasmic reticulum [GO:0005783];endoplasmic reticulum membrane [GO:0005789];intracellular membrane-bounded organelle [GO:0043231];membrane [GO:0016020];mitochondrial inner membrane [GO:0005743];mitochondrion [GO:0005739];nucleus [GO:0005634];peroxisome [GO:0005777];3-chloroallyl aldehyde dehydrogenase activity [GO:0004028];aldehyde dehydrogenase (NAD…	GO:0000302;GO:0004028;GO:0004029;GO:0005634;GO:0005737;GO:0005739;GO:0005743;GO:0005777;GO:0005783;GO:0005789;GO:0005829;GO:0006081;GO:0006631;GO:0006714;GO:0007417;GO:0007422;GO:0008544;GO:0016020;GO:0033306;GO:0042803;GO:0043231;GO:0043878;GO:0046292;GO:0046458;GO:0046577;GO:0050061;GO:0052814	1.2.1.3;1.2.1.94
16.2223	15.2644	15.4448	15.2531	14.6364	14.4896	14.3737	14.5292	14.0834	14.2648	15.1648	14.6528	14.8181	14.3999	15.3601	15.0802	14.456	FMO-like	+	11.4997	0	P50285	P50285	FMO1_MOUSE	Fmo1	Flavin-containing monooxygenase 1	3bb_3ea;3ab_3ea;3ha_3ea;3ga_3ea;3ba_3ea;3aa_3ea;3ba_3eb;3aa_3eb;3ba_3fb;3aa_3fb;3ba_ctrl;3aa_ctrl;3aa_3ca;3aa_3db;3aa_3cb;3aa_3gb;3aa_3da;3aa_3fa;3aa_3ia;3aa_3bb;3aa_3ab;3aa_3ha;3aa_3ga;3aa_3ba	energy homeostasis [GO:0097009];NADPH oxidation [GO:0070995];negative regulation of fatty acid oxidation [GO:0046322];organic acid metabolic process [GO:0006082];response to lipopolysaccharide [GO:0032496];response to osmotic stress [GO:0006970];taurine biosynthetic process [GO:0042412];toxin metabolic process [GO:0009404];xenobiotic metabolic process [GO:0006805]	endoplasmic reticulum membrane [GO:0005789];intracellular membrane-bounded organelle [GO:0043231]	flavin adenine dinucleotide binding [GO:0050660];hypotaurine dehydrogenase activity [GO:0047822];monooxygenase activity [GO:0004497];N,N-dimethylaniline monooxygenase activity [GO:0004499];NADP binding [GO:0050661];trimethylamine monooxygenase activity [GO:0034899]	endoplasmic reticulum membrane [GO:0005789];intracellular membrane-bounded organelle [GO:0043231];flavin adenine dinucleotide binding [GO:0050660];hypotaurine dehydrogenase activity [GO:0047822];monooxygenase activity [GO:0004497];N,N-dimethylaniline monooxygenase activity [GO:0004499];NADP binding [GO:0050661];trimethylamine monooxygenase activity [GO:0034899];energy homeostasis [GO:0097009];NAD…	GO:0004497;GO:0004499;GO:0005789;GO:0006082;GO:0006805;GO:0006970;GO:0009404;GO:0032496;GO:0034899;GO:0042412;GO:0043231;GO:0046322;GO:0047822;GO:0050660;GO:0050661;GO:0070995;GO:0097009	1.14.13.148;1.14.13.8
17.2106	16.9091	17.1501	16.9595	16.9325	16.887	16.8852	16.853	16.8827	16.9189	17.6374	17.2057	17.0901	17.2133	17.3647	17.2683	16.9149	Acyl-CoA_dh_1;Acyl-CoA_dh_M;Acyl-CoA_dh_N	+	6.68522	0.0006	P50544	P50544	ACADV_MOUSE	Acadvl	Very long-chain specific acyl-CoA dehydrogenase, mitochondrial	3ia_3ea;3ha_3ea;3ga_3ea;3ga_ctrl;3ga_3db;3ha_3cb;3ga_3cb;3ga_3ca;3ga_3ab;3ga_3da;3ga_3eb;3ga_3bb;3ga_3fa;3ga_3aa	epithelial cell differentiation [GO:0030855];fatty acid beta-oxidation [GO:0006635];fatty acid beta-oxidation using acyl-CoA dehydrogenase [GO:0033539];fatty acid catabolic process [GO:0009062];negative regulation of fatty acid biosynthetic process [GO:0045717];negative regulation of fatty acid oxidation [GO:0046322];regulation of cholesterol metabolic process [GO:0090181];response to cold [GO:00…	extrinsic component of mitochondrial inner membrane [GO:0031314];mitochondrial inner membrane [GO:0005743];mitochondrial membrane [GO:0031966];mitochondrial nucleoid [GO:0042645];mitochondrion [GO:0005739];nucleolus [GO:0005730];nucleoplasm [GO:0005654]	acyl-CoA dehydrogenase activity [GO:0003995];fatty-acyl-CoA binding [GO:0000062];flavin adenine dinucleotide binding [GO:0050660];identical protein binding [GO:0042802];long-chain-acyl-CoA dehydrogenase activity [GO:0004466];very-long-chain-acyl-CoA dehydrogenase activity [GO:0017099]	extrinsic component of mitochondrial inner membrane [GO:0031314];mitochondrial inner membrane [GO:0005743];mitochondrial membrane [GO:0031966];mitochondrial nucleoid [GO:0042645];mitochondrion [GO:0005739];nucleolus [GO:0005730];nucleoplasm [GO:0005654];acyl-CoA dehydrogenase activity [GO:0003995];fatty-acyl-CoA binding [GO:0000062];flavin adenine dinucleotide binding [GO:0050660];identical prote…	GO:0000062;GO:0001659;GO:0003995;GO:0004466;GO:0005654;GO:0005730;GO:0005739;GO:0005743;GO:0006635;GO:0009062;GO:0009409;GO:0017099;GO:0030855;GO:0031314;GO:0031966;GO:0033539;GO:0042645;GO:0042802;GO:0045717;GO:0046322;GO:0050660;GO:0090181	1.3.8.9
13.6256	13.384	13.8091	13.7265	13.9056	13.2655	13.2239	13.2098	13.2046	13.3942	13.9874	13.4299	13.5904	13.1613	13.501	13.6429	13.3466	Amino_oxidase	+	3.95316	0.0162632	P51175	P51175	PPOX_MOUSE	Ppox	Protoporphyrinogen oxidase	3da_3cb;3ga_3cb;3da_3fb;3ga_3fb;3da_3ea;3ga_3ea	heme biosynthetic process [GO:0006783];porphyrin-containing compound biosynthetic process [GO:0006779];protoporphyrinogen IX biosynthetic process [GO:0006782];protoporphyrinogen IX metabolic process [GO:0046501];response to xenobiotic stimulus [GO:0009410]	mitochondrial inner membrane [GO:0005743];mitochondrial membrane [GO:0031966];mitochondrion [GO:0005739]	oxygen-dependent protoporphyrinogen oxidase activity [GO:0004729]	mitochondrial inner membrane [GO:0005743];mitochondrial membrane [GO:0031966];mitochondrion [GO:0005739];oxygen-dependent protoporphyrinogen oxidase activity [GO:0004729];heme biosynthetic process [GO:0006783];porphyrin-containing compound biosynthetic process [GO:0006779];protoporphyrinogen IX biosynthetic process [GO:0006782];protoporphyrinogen IX metabolic process [GO:0046501];response to xeno…	GO:0004729;GO:0005739;GO:0005743;GO:0006779;GO:0006782;GO:0006783;GO:0009410;GO:0031966;GO:0046501	1.3.3.4
15.6764	14.7392	15.2556	14.9973	14.932	14.7572	14.9451	14.797	14.5811	14.6214	15.5424	14.8837	15.0821	14.8998	16.0148	15.2195	14.9577	adh_short	+	6.18055	0.00104348	P51658	P51658	DHB2_MOUSE	Hsd17b2	Estradiol 17-beta-dehydrogenase 2	3aa_3eb;3ha_3eb;3aa_3ea;3ha_3ea;3aa_ctrl;3ha_ctrl;3aa_3ab;3ha_3ab;3aa_3db;3ha_3db;3aa_3gb;3ha_3gb;3aa_3fb;3ha_3fb;3aa_3cb;3ha_3cb;3aa_3bb;3ha_3bb;3aa_3da;3ha_3da;3ha_3fa;3ha_3ca	androgen biosynthetic process [GO:0006702];androgen metabolic process [GO:0008209];estrogen biosynthetic process [GO:0006703];in utero embryonic development [GO:0001701];placenta development [GO:0001890];response to retinoic acid [GO:0032526];steroid metabolic process [GO:0008202]	endoplasmic reticulum membrane [GO:0005789];intracellular membrane-bounded organelle [GO:0043231]	17-beta-hydroxysteroid dehydrogenase (NAD+) activity [GO:0044594];estradiol 17-beta-dehydrogenase [NAD(P)] activity [GO:0004303];testosterone dehydrogenase (NAD+) activity [GO:0047035]	endoplasmic reticulum membrane [GO:0005789];intracellular membrane-bounded organelle [GO:0043231];17-beta-hydroxysteroid dehydrogenase (NAD+) activity [GO:0044594];estradiol 17-beta-dehydrogenase [NAD(P)] activity [GO:0004303];testosterone dehydrogenase (NAD+) activity [GO:0047035];androgen biosynthetic process [GO:0006702];androgen metabolic process [GO:0008209];estrogen biosynthetic process [GO…	GO:0001701;GO:0001890;GO:0004303;GO:0005789;GO:0006702;GO:0006703;GO:0008202;GO:0008209;GO:0032526;GO:0043231;GO:0044594;GO:0047035	1.1.1.239;1.1.1.62
15.2239	15.0617	15.0302	15.0214	15.0222	15.1425	14.9735	14.9666	14.7317	14.9796	15.6117	16.0983	15.1078	15.5843	15.5091	15.2468	15.1301	ALO;FAD_binding_4	+	6.24197	0.00106667	P58710	P58710	GGLO_MOUSE	Gulo	L-gulonolactone oxidase	3fb_3ea;3ga_3ea;3gb_3ea;3ga_3eb;3gb_3eb;3ga_ctrl;3gb_ctrl;3ga_3ca;3gb_3ca;3ga_3ab;3gb_3ab;3ga_3ba;3gb_3ba;3gb_3bb;3ga_3cb;3gb_3cb;3gb_3fa;3gb_3da;3gb_3ia;3gb_3aa	L-ascorbic acid biosynthetic process [GO:0019853]	endoplasmic reticulum membrane [GO:0005789]	D-arabinono-1,4-lactone oxidase activity [GO:0003885];FAD binding [GO:0071949];flavin adenine dinucleotide binding [GO:0050660];L-gulonolactone oxidase activity [GO:0050105];oxidoreductase activity [GO:0016491]	endoplasmic reticulum membrane [GO:0005789];D-arabinono-1,4-lactone oxidase activity [GO:0003885];FAD binding [GO:0071949];flavin adenine dinucleotide binding [GO:0050660];L-gulonolactone oxidase activity [GO:0050105];oxidoreductase activity [GO:0016491];L-ascorbic acid biosynthetic process [GO:0019853]	GO:0003885;GO:0005789;GO:0016491;GO:0019853;GO:0050105;GO:0050660;GO:0071949	1.1.3.8
16.3379	16.1966	16.2287	16.2601	16.1225	16.2024	16.1994	16.1813	15.9594	16.18	16.2495	16.1674	16.1482	16.291	16.2833	16.44	16.065	Ribosomal_S8	+	3.7176	0.0220476	P62245	P62245	RS15A_MOUSE	Rps15a	40S ribosomal protein S15a	3bb_3ea;3aa_3ea;3ia_3ea;3ia_3fa;3ia_ctrl	cytoplasmic translation [GO:0002181];positive regulation of cell cycle [GO:0045787];positive regulation of cell population proliferation [GO:0008284];response to virus [GO:0009615];ribosomal small subunit biogenesis [GO:0042274];translation at postsynapse [GO:0140242];translation at presynapse [GO:0140236]	cytoplasm [GO:0005737];cytosol [GO:0005829];cytosolic ribosome [GO:0022626];cytosolic small ribosomal subunit [GO:0022627];mitochondrion [GO:0005739];postsynapse [GO:0098794];presynapse [GO:0098793];ribosome [GO:0005840];small-subunit processome [GO:0032040];synapse [GO:0045202]	structural constituent of ribosome [GO:0003735]	cytoplasm [GO:0005737];cytosol [GO:0005829];cytosolic ribosome [GO:0022626];cytosolic small ribosomal subunit [GO:0022627];mitochondrion [GO:0005739];postsynapse [GO:0098794];presynapse [GO:0098793];ribosome [GO:0005840];small-subunit processome [GO:0032040];synapse [GO:0045202];structural constituent of ribosome [GO:0003735];cytoplasmic translation [GO:0002181];positive regulation of cell cycle …	GO:0002181;GO:0003735;GO:0005737;GO:0005739;GO:0005829;GO:0005840;GO:0008284;GO:0009615;GO:0022626;GO:0022627;GO:0032040;GO:0042274;GO:0045202;GO:0045787;GO:0098793;GO:0098794;GO:0140236;GO:0140242
18.4094	18.2644	18.3849	18.3632	18.0858	18.4586	18.2842	18.2542	18.0272	18.4248	18.5006	18.314	18.3532	18.4568	19.0235	18.3992	18.443	Tubulin;Tubulin_C	+	4.83872	0.0047619	P68372	P99024;Q9D6F9;P68372	TBB4B_MOUSE	Tubb4b	Tubulin beta-4B chain	3ga_3ea;3fb_3ea;3ha_3ea;3ha_3da;3ha_3cb;3ha_3ab;3ha_3ca;3ha_3eb;3ha_ctrl;3ha_3gb;3ha_3fa;3ha_3bb;3ha_3aa;3ha_3ba;3ha_3db	microtubule cytoskeleton organization [GO:0000226];microtubule-based process [GO:0007017];mitotic cell cycle [GO:0000278]	cytoplasm [GO:0005737];intercellular bridge [GO:0045171];microtubule [GO:0005874];microtubule cytoskeleton [GO:0015630];mitotic spindle [GO:0072686];myelin sheath [GO:0043209];tubulin complex [GO:0045298]	double-stranded RNA binding [GO:0003725];GTP binding [GO:0005525];GTPase activity [GO:0003924];metal ion binding [GO:0046872];structural constituent of cytoskeleton [GO:0005200]	cytoplasm [GO:0005737];intercellular bridge [GO:0045171];microtubule [GO:0005874];microtubule cytoskeleton [GO:0015630];mitotic spindle [GO:0072686];myelin sheath [GO:0043209];tubulin complex [GO:0045298];double-stranded RNA binding [GO:0003725];GTP binding [GO:0005525];GTPase activity [GO:0003924];metal ion binding [GO:0046872];structural constituent of cytoskeleton [GO:0005200];microtubule cyto…	GO:0000226;GO:0000278;GO:0003725;GO:0003924;GO:0005200;GO:0005525;GO:0005737;GO:0005874;GO:0007017;GO:0015630;GO:0043209;GO:0045171;GO:0045298;GO:0046872;GO:0072686
15.8608	15.8158	15.706	15.8542	15.6459	15.6718	15.7525	15.7313	15.6246	15.5404	15.6956	15.7411	15.6992	15.8986	16.9164	15.8788	15.7254	AIRS;AIRS_C	+	4.68199	0.00621538	P97364	P97364	SPS2_MOUSE	Sephs2	Selenide, water dikinase 2	3ha_3eb;3ha_3da;3ha_3ea;3ha_3db;3ha_3ba;3ha_3ca;3ha_ctrl;3ha_3cb;3ha_3ga;3ha_3gb;3ha_3fa;3ha_3bb;3ha_3ia;3ha_3ab;3ha_3aa;3ha_3fb	phosphorylation [GO:0016310];selenium compound metabolic process [GO:0001887];selenocysteine biosynthetic process [GO:0016260]	cytoplasm [GO:0005737]	ATP binding [GO:0005524];metal ion binding [GO:0046872];selenide, water dikinase activity [GO:0004756]	cytoplasm [GO:0005737];ATP binding [GO:0005524];metal ion binding [GO:0046872];selenide, water dikinase activity [GO:0004756];phosphorylation [GO:0016310];selenium compound metabolic process [GO:0001887];selenocysteine biosynthetic process [GO:0016260]	GO:0001887;GO:0004756;GO:0005524;GO:0005737;GO:0016260;GO:0016310;GO:0046872	2.7.9.3
16.7394	16.7832	16.8544	17.2612	16.2112	16.0815	16.4891	16.4976	16.1911	15.8056	16.0573	15.9413	16.1729	16.6141	16.0499	15.9011	15.7881	Ald_Xan_dh_C;Ald_Xan_dh_C2;CO_deh_flav_C;FAD_binding_5;Fer2;Fer2_2	+	10.4282	0	Q00519	Q00519	XDH_MOUSE	Xdh	Xanthine dehydrogenase/oxidase	3cb_ctrl;3ab_ctrl;3aa_ctrl;3ba_ctrl;3bb_ctrl;3ab_3eb;3aa_3eb;3ba_3eb;3bb_3eb;3ab_3ia;3aa_3ia;3ba_3ia;3bb_3ia;3ab_3gb;3aa_3gb;3ba_3gb;3bb_3gb;3ab_3ha;3aa_3ha;3ba_3ha;3bb_3ha;3aa_3ga;3ba_3ga;3bb_3ga;3ba_3db;3bb_3db;3bb_3da;3bb_3fa;3bb_3ea	activation of cysteine-type endopeptidase activity involved in apoptotic process [GO:0006919];adenosine catabolic process [GO:0006154];allantoin metabolic process [GO:0000255];amide catabolic process [GO:0043605];AMP catabolic process [GO:0006196];dAMP catabolic process [GO:0046059];deoxyadenosine catabolic process [GO:0006157];deoxyguanosine catabolic process [GO:0006161];deoxyinosine catabolic …	cytosol [GO:0005829];extracellular space [GO:0005615];peroxisome [GO:0005777];sarcoplasmic reticulum [GO:0016529]	2 iron, 2 sulfur cluster binding [GO:0051537];FAD binding [GO:0071949];flavin adenine dinucleotide binding [GO:0050660];hypoxanthine dehydrogenase activity [GO:0070674];hypoxanthine oxidase activity [GO:0070675];identical protein binding [GO:0042802];iron ion binding [GO:0005506];molybdenum ion binding [GO:0030151];molybdopterin cofactor binding [GO:0043546];nitrite reductase (NO-forming) activit…	cytosol [GO:0005829];extracellular space [GO:0005615];peroxisome [GO:0005777];sarcoplasmic reticulum [GO:0016529];2 iron, 2 sulfur cluster binding [GO:0051537];FAD binding [GO:0071949];flavin adenine dinucleotide binding [GO:0050660];hypoxanthine dehydrogenase activity [GO:0070674];hypoxanthine oxidase activity [GO:0070675];identical protein binding [GO:0042802];iron ion binding [GO:0005506];moly…	GO:0000255;GO:0001933;GO:0001937;GO:0004854;GO:0004855;GO:0005506;GO:0005615;GO:0005777;GO:0005829;GO:0006147;GO:0006148;GO:0006149;GO:0006154;GO:0006157;GO:0006161;GO:0006196;GO:0006204;GO:0006919;GO:0007595;GO:0009114;GO:0009115;GO:0010044;GO:0010629;GO:0016226;GO:0016491;GO:0016529;GO:0030151;GO:0030856;GO:0042802;GO:0042803;GO:0043546;GO:0043605;GO:0045602;GO:0046038;GO:0046055;GO:0046059;GO:…	1.17.1.4;1.17.3.2
17.1865	17.1401	17.3912	17.1036	17.1428	16.9789	17.1267	17.1289	17.2964	17.2287	17.7471	17.5675	17.1995	17.0344	17.5075	18.2247	17.6148	Apolipoprotein	+	3.24339	0.0491304	Q00623	Q00623	APOA1_MOUSE	Apoa1	Apolipoprotein A-I	3ga_3db;3ia_3db;3ia_3bb;3ia_3ca;3ia_3cb;3ia_3fb;3ia_3da;3ia_3fa;3ia_3ab	adrenal gland development [GO:0030325];animal organ regeneration [GO:0031100];blood vessel endothelial cell migration [GO:0043534];cholesterol biosynthetic process [GO:0006695];cholesterol efflux [GO:0033344];cholesterol homeostasis [GO:0042632];cholesterol import [GO:0070508];cholesterol metabolic process [GO:0008203];cholesterol transport [GO:0030301];endothelial cell proliferation [GO:0001935]…	cell surface [GO:0009986];cytoplasmic vesicle [GO:0031410];cytosol [GO:0005829];discoidal high-density lipoprotein particle [GO:0034365];endocytic vesicle [GO:0030139];extracellular region [GO:0005576];extracellular space [GO:0005615];high-density lipoprotein particle [GO:0034364];intermediate-density lipoprotein particle [GO:0034363];low-density lipoprotein particle [GO:0034362];nucleus [GO:0005…	amyloid-beta binding [GO:0001540];apolipoprotein A-I receptor binding [GO:0034191];apolipoprotein receptor binding [GO:0034190];chemorepellent activity [GO:0045499];cholesterol binding [GO:0015485];cholesterol transfer activity [GO:0120020];enzyme binding [GO:0019899];heat shock protein binding [GO:0031072];high-density lipoprotein particle binding [GO:0008035];high-density lipoprotein particle r…	cell surface [GO:0009986];cytoplasmic vesicle [GO:0031410];cytosol [GO:0005829];discoidal high-density lipoprotein particle [GO:0034365];endocytic vesicle [GO:0030139];extracellular region [GO:0005576];extracellular space [GO:0005615];high-density lipoprotein particle [GO:0034364];intermediate-density lipoprotein particle [GO:0034363];low-density lipoprotein particle [GO:0034362];nucleus [GO:0005…	GO:0001540;GO:0001932;GO:0001935;GO:0002719;GO:0005102;GO:0005319;GO:0005543;GO:0005576;GO:0005615;GO:0005634;GO:0005829;GO:0006644;GO:0006656;GO:0006695;GO:0007186;GO:0007229;GO:0008035;GO:0008203;GO:0008211;GO:0008289;GO:0009986;GO:0010804;GO:0010875;GO:0010903;GO:0015485;GO:0015914;GO:0018158;GO:0018206;GO:0019899;GO:0019915;GO:0030139;GO:0030300;GO:0030301;GO:0030325;GO:0031072;GO:0031100;GO:…
12.886	13.0834	12.7125	12.9312	12.7438	12.8672	13.0092	12.474	12.8189	12.8838	12.7271	13.3718	12.8354	14.373	12.9628	12.7547	12.8062	PseudoU_synth_2	+	4.25971	0.0102286	Q14AI6	Q14AI6	RUSD3_MOUSE	Rpusd3	Mitochondrial mRNA pseudouridine synthase Rpusd3	3fb_3cb;3fb_3ia;3fb_3ga;3fb_3db;3fb_3eb;3fb_3ba;3fb_3da;3fb_3bb;3fb_ctrl;3fb_3ea;3fb_3aa;3fb_3fa;3fb_3ca;3fb_3ab;3fb_3ha;3fb_3gb	mRNA processing [GO:0006397];positive regulation of mitochondrial translation [GO:0070131];pseudouridine synthesis [GO:0001522]	mitochondrial matrix [GO:0005759];mitochondrion [GO:0005739];ribonucleoprotein granule [GO:0035770]	pseudouridine synthase activity [GO:0009982];RNA binding [GO:0003723]	mitochondrial matrix [GO:0005759];mitochondrion [GO:0005739];ribonucleoprotein granule [GO:0035770];pseudouridine synthase activity [GO:0009982];RNA binding [GO:0003723];mRNA processing [GO:0006397];positive regulation of mitochondrial translation [GO:0070131];pseudouridine synthesis [GO:0001522]	GO:0001522;GO:0003723;GO:0005739;GO:0005759;GO:0006397;GO:0009982;GO:0035770;GO:0070131	5.4.99.-
13.3561	12.5814	12.8218	12.6693	12.6855	12.6395	12.7049	12.5878	12.1773	12.5217	12.9008	12.7088	12.7889	12.6752	13.5048	12.8893	12.4082	IIGP	+	4.35515	0.00917647	Q60766	Q60766	IRGM1_MOUSE	Irgm1	Immunity-related GTPase family M protein 1	3aa_3ea;3ha_3ea;3aa_ctrl;3ha_ctrl;3aa_3ab;3ha_3ab;3aa_3eb;3ha_3eb;3aa_3da;3ha_3da;3ha_3db;3ha_3fa;3aa_3cb;3ha_3cb	autophagosome assembly [GO:0000045];autophagosome maturation [GO:0097352];CAMKK-AMPK signaling cascade [GO:0061762];cellular response to interferon-beta [GO:0035458];cellular response to lipopolysaccharide [GO:0071222];cellular response to type II interferon [GO:0071346];cellular response to virus [GO:0098586];defense response [GO:0006952];defense response to bacterium [GO:0042742];defense respon…	autolysosome [GO:0044754];autophagosome [GO:0005776];autophagosome membrane [GO:0000421];cell projection [GO:0042995];cytosol [GO:0005829];endoplasmic reticulum [GO:0005783];endoplasmic reticulum membrane [GO:0005789];Golgi apparatus [GO:0005794];Golgi membrane [GO:0000139];late endosome [GO:0005770];late endosome membrane [GO:0031902];lysosomal membrane [GO:0005765];lysosome [GO:0005764];mitocho…	BH3 domain binding [GO:0051434];CARD domain binding [GO:0050700];cardiolipin binding [GO:1901612];GTP binding [GO:0005525];GTPase activity [GO:0003924];phosphatidylinositol-3,4,5-trisphosphate binding [GO:0005547];phosphatidylinositol-3,4-bisphosphate binding [GO:0043325];protein kinase binding [GO:0019901];protein serine/threonine kinase activator activity [GO:0043539]	autolysosome [GO:0044754];autophagosome [GO:0005776];autophagosome membrane [GO:0000421];cell projection [GO:0042995];cytosol [GO:0005829];endoplasmic reticulum [GO:0005783];endoplasmic reticulum membrane [GO:0005789];Golgi apparatus [GO:0005794];Golgi membrane [GO:0000139];late endosome [GO:0005770];late endosome membrane [GO:0031902];lysosomal membrane [GO:0005765];lysosome [GO:0005764];mitocho…	GO:0000045;GO:0000139;GO:0000421;GO:0001891;GO:0001934;GO:0003924;GO:0005525;GO:0005547;GO:0005739;GO:0005764;GO:0005765;GO:0005770;GO:0005776;GO:0005783;GO:0005789;GO:0005794;GO:0005829;GO:0006952;GO:0009617;GO:0010508;GO:0010800;GO:0019901;GO:0030670;GO:0031648;GO:0031902;GO:0031966;GO:0032480;GO:0032689;GO:0033138;GO:0035458;GO:0042742;GO:0042995;GO:0043032;GO:0043254;GO:0043325;GO:0043539;GO:…	3.6.5.-
14.4335	12.5517	13.3599	12.7459	12.1573	12.6396	12.3458	12.6186	11.9655	12.8499	12.4737	12.2891	12.3598	12.3604	12.6146	12.8228	12.3523	CD36	+	7.86482	0	Q61009	Q61009	SCRB1_MOUSE	Scarb1	Scavenger receptor class B member 1	3fa_3ea;3ga_3ea;3bb_3ea;3cb_3ea;3ha_3ea;3ab_3ea;3eb_3ea;3ia_3ea;3ba_3ea;3aa_3ea;3aa_3ca;3aa_3da;3aa_3gb;3aa_3fb;3aa_3db;3aa_ctrl;3aa_3fa;3aa_3ga;3aa_3bb;3aa_3cb;3aa_3ha;3aa_3ab;3aa_3eb;3aa_3ia	adhesion of symbiont to host [GO:0044406];androgen biosynthetic process [GO:0006702];blood vessel endothelial cell migration [GO:0043534];carotenoid transport [GO:0046867];cholesterol catabolic process [GO:0006707];cholesterol efflux [GO:0033344];cholesterol homeostasis [GO:0042632];cholesterol import [GO:0070508];cholesterol transport [GO:0030301];detection of lipopolysaccharide [GO:0032497];end…	caveola [GO:0005901];cell surface [GO:0009986];cytoplasm [GO:0005737];intracellular membrane-bounded organelle [GO:0043231];lysosome [GO:0005764];membrane [GO:0016020];microvillus membrane [GO:0031528];plasma membrane [GO:0005886]	amyloid-beta binding [GO:0001540];apolipoprotein A-I binding [GO:0034186];apolipoprotein binding [GO:0034185];high-density lipoprotein particle binding [GO:0008035];high-density lipoprotein particle receptor activity [GO:0070506];identical protein binding [GO:0042802];lipid binding [GO:0008289];lipopolysaccharide binding [GO:0001530];lipopolysaccharide immune receptor activity [GO:0001875];low-de…	caveola [GO:0005901];cell surface [GO:0009986];cytoplasm [GO:0005737];intracellular membrane-bounded organelle [GO:0043231];lysosome [GO:0005764];membrane [GO:0016020];microvillus membrane [GO:0031528];plasma membrane [GO:0005886];amyloid-beta binding [GO:0001540];apolipoprotein A-I binding [GO:0034186];apolipoprotein binding [GO:0034185];high-density lipoprotein particle binding [GO:0008035];hig…	GO:0001530;GO:0001540;GO:0001786;GO:0001875;GO:0001935;GO:0005044;GO:0005737;GO:0005764;GO:0005886;GO:0005901;GO:0006702;GO:0006707;GO:0006869;GO:0006910;GO:0008035;GO:0008289;GO:0009986;GO:0010867;GO:0010886;GO:0010899;GO:0015914;GO:0015920;GO:0016020;GO:0030169;GO:0030301;GO:0031528;GO:0032497;GO:0033344;GO:0034185;GO:0034186;GO:0034375;GO:0034381;GO:0034383;GO:0034384;GO:0035461;GO:0042632;GO:…
11.0834	10.8026	10.811	10.2275	10.8965	9.13568	10.0292	10.5027	10.7556	10.7207	11.1875	11.1401	11.1026	10.7839	12.1197	11.0293	9.22909	APOC4	+	3.38293	0.0388132	Q61268	Q61268	APOC4_MOUSE	Apoc4	Apolipoprotein C-IV	3ha_ctrl;3ha_3db;3ha_3ca;3ha_3bb;3ha_3ea;3ha_3cb;3ha_3ba	lipid transport [GO:0006869];positive regulation of sequestering of triglyceride [GO:0010890];triglyceride homeostasis [GO:0070328]	extracellular region [GO:0005576];high-density lipoprotein particle [GO:0034364];very-low-density lipoprotein particle [GO:0034361]		extracellular region [GO:0005576];high-density lipoprotein particle [GO:0034364];very-low-density lipoprotein particle [GO:0034361];lipid transport [GO:0006869];positive regulation of sequestering of triglyceride [GO:0010890];triglyceride homeostasis [GO:0070328]	GO:0005576;GO:0006869;GO:0010890;GO:0034361;GO:0034364;GO:0070328
14.8649	15.3105	15.0338	15.7784	14.7659	14.4947	14.826	14.2617	14.8422	14.7445	14.7581	14.4961	14.6674	14.1492	14.7481	14.6704	14.769		+	14.1451	0	Q61578	Q61578	ADRO_MOUSE	Fdxr	NADPH:adrenodoxin oxidoreductase, mitochondrial	3ga_3fb;3ha_3fb;3eb_3fb;ctrl_3fb;3da_3fb;3ca_3fb;3ea_3fb;3aa_3fb;3ba_3fb;3ab_3fb;3bb_3fb;3ca_3cb;3ea_3cb;3aa_3cb;3ba_3cb;3ab_3cb;3bb_3cb;3ab_3db;3bb_3db;3ab_3gb;3bb_3gb;3ab_3ia;3bb_3ia;3ab_3fa;3bb_3fa;3ab_3ga;3bb_3ga;3ab_3ha;3bb_3ha;3ab_3eb;3bb_3eb;3ab_ctrl;3bb_ctrl;3ab_3da;3bb_3da;3ab_3ca;3bb_3ca;3bb_3ea;3bb_3aa;3bb_3ba	cholesterol metabolic process [GO:0008203];NADPH oxidation [GO:0070995];ubiquinone biosynthetic process [GO:0006744]	mitochondrial inner membrane [GO:0005743];mitochondrion [GO:0005739]	NADPH binding [GO:0070402];NADPH-adrenodoxin reductase activity [GO:0015039]	mitochondrial inner membrane [GO:0005743];mitochondrion [GO:0005739];NADPH binding [GO:0070402];NADPH-adrenodoxin reductase activity [GO:0015039];cholesterol metabolic process [GO:0008203];NADPH oxidation [GO:0070995];ubiquinone biosynthetic process [GO:0006744]	GO:0005739;GO:0005743;GO:0006744;GO:0008203;GO:0015039;GO:0070402;GO:0070995	1.18.1.6
14.9425	14.5774	14.8036	14.6012	14.3669	13.9107	14.5646	14.3424	14.3709	14.1128	15.9334	15.9626	15.5269	15.773	15.2137	15.3676	14.4058	Amino_oxidase	+	6.10157	0.001	Q64133	Q64133	AOFA_MOUSE	Maoa	Amine oxidase [flavin-containing] A	3gb_3ea;3fb_3ea;3ga_3ea;3gb_3eb;3fb_3eb;3ga_3eb;3gb_3db;3fb_3db;3ga_3db;3fb_3ca;3ga_3ca;3fb_3cb;3ga_3cb;3fb_3bb;3ga_3bb;3ga_3da;3ga_ctrl	dopamine catabolic process [GO:0042420];neurotransmitter catabolic process [GO:0042135];phenylethylamine metabolic process [GO:0042443];positive regulation of signal transduction [GO:0009967];serotonin metabolic process [GO:0042428]	cytosol [GO:0005829];mitochondrial outer membrane [GO:0005741];mitochondrion [GO:0005739]	aliphatic amine oxidase activity [GO:0052595];flavin adenine dinucleotide binding [GO:0050660];monoamine oxidase activity [GO:0097621];phenethylamine:oxygen oxidoreductase (deaminating) activity [GO:0052596];primary amine oxidase activity [GO:0008131];serotonin binding [GO:0051378]	cytosol [GO:0005829];mitochondrial outer membrane [GO:0005741];mitochondrion [GO:0005739];aliphatic amine oxidase activity [GO:0052595];flavin adenine dinucleotide binding [GO:0050660];monoamine oxidase activity [GO:0097621];phenethylamine:oxygen oxidoreductase (deaminating) activity [GO:0052596];primary amine oxidase activity [GO:0008131];serotonin binding [GO:0051378];dopamine catabolic process…	GO:0005739;GO:0005741;GO:0005829;GO:0008131;GO:0009967;GO:0042135;GO:0042420;GO:0042428;GO:0042443;GO:0050660;GO:0051378;GO:0052595;GO:0052596;GO:0097621	1.4.3.21;1.4.3.4
14.9827	14.9066	15.2477	15.5777	14.9257	14.9149	14.7166	14.8235	14.1657	14.2856	14.8948	14.843	14.4648	14.9195	14.382	14.6675	14.2137	p450	+	4.8705	0.00464516	Q64464	Q64464	CP3AD_MOUSE	Cyp3a13	Cytochrome P450 3A13	3ba_3ea;3bb_3ea;3ba_ctrl;3bb_ctrl;3ba_3eb;3bb_3eb;3bb_3fa;3bb_3ha	alkaloid catabolic process [GO:0009822];estrogen metabolic process [GO:0008210];lipid hydroxylation [GO:0002933];oxidative demethylation [GO:0070989];positive regulation of gene expression [GO:0010628];retinoic acid metabolic process [GO:0042573];steroid metabolic process [GO:0008202];xenobiotic catabolic process [GO:0042178]	cytoplasm [GO:0005737];endoplasmic reticulum membrane [GO:0005789]	1-alpha,25-dihydroxyvitamin D3 23-hydroxylase activity [GO:0062181];aromatase activity [GO:0070330];caffeine oxidase activity [GO:0034875];enzyme binding [GO:0019899];estrogen 16-alpha-hydroxylase activity [GO:0101020];estrogen 2-hydroxylase activity [GO:0101021];heme binding [GO:0020037];iron ion binding [GO:0005506];monooxygenase activity [GO:0004497];oxidoreductase activity [GO:0016491];retino…	cytoplasm [GO:0005737];endoplasmic reticulum membrane [GO:0005789];1-alpha,25-dihydroxyvitamin D3 23-hydroxylase activity [GO:0062181];aromatase activity [GO:0070330];caffeine oxidase activity [GO:0034875];enzyme binding [GO:0019899];estrogen 16-alpha-hydroxylase activity [GO:0101020];estrogen 2-hydroxylase activity [GO:0101021];heme binding [GO:0020037];iron ion binding [GO:0005506];monooxygenas…	GO:0002933;GO:0004497;GO:0005496;GO:0005506;GO:0005737;GO:0005789;GO:0008202;GO:0008210;GO:0008395;GO:0008401;GO:0009822;GO:0010628;GO:0016491;GO:0019899;GO:0020037;GO:0030343;GO:0034875;GO:0042178;GO:0042573;GO:0050649;GO:0062181;GO:0070330;GO:0070576;GO:0070989;GO:0101020;GO:0101021	1.14.14.1
13.3474	12.9969	13.4589	13.3744	14.7415	13.4039	13.5506	13.5689	12.7336	13.1697	14.6875	13.6596	14.0301	13.6034	13.1961	13.4968	12.8606	DAO;EF-hand_7	+	7.18839	0.000125	Q64521	Q64521	GPDM_MOUSE	Gpd2	Glycerol-3-phosphate dehydrogenase, mitochondrial	3ca_3ea;3fa_3ea;3ga_3ea;3da_3ea;3ga_ctrl;3da_ctrl;3ga_3eb;3da_3eb;3ga_3ab;3da_3ab;3ga_3ha;3da_3ha;3ga_3db;3da_3db;3ga_3bb;3da_3bb;3ga_3ia;3da_3ia;3da_3aa;3da_3cb;3da_3ba	camera-type eye development [GO:0043010];gluconeogenesis [GO:0006094];glycerol catabolic process [GO:0019563];glycerol-3-phosphate metabolic process [GO:0006072];multicellular organism growth [GO:0035264];NADH metabolic process [GO:0006734]	glycerol-3-phosphate dehydrogenase complex [GO:0009331];mitochondrial inner membrane [GO:0005743];mitochondrion [GO:0005739]	calcium ion binding [GO:0005509];glycerol-3-phosphate dehydrogenase (quinone) activity [GO:0004368];glycerol-3-phosphate dehydrogenase [NAD(P)+] activity [GO:0047952];sn-glycerol-3-phosphate:ubiquinone-8 oxidoreductase activity [GO:0052591]	glycerol-3-phosphate dehydrogenase complex [GO:0009331];mitochondrial inner membrane [GO:0005743];mitochondrion [GO:0005739];calcium ion binding [GO:0005509];glycerol-3-phosphate dehydrogenase (quinone) activity [GO:0004368];glycerol-3-phosphate dehydrogenase [NAD(P)+] activity [GO:0047952];sn-glycerol-3-phosphate:ubiquinone-8 oxidoreductase activity [GO:0052591];camera-type eye development [GO:0…	GO:0004368;GO:0005509;GO:0005739;GO:0005743;GO:0006072;GO:0006094;GO:0006734;GO:0009331;GO:0019563;GO:0035264;GO:0043010;GO:0047952;GO:0052591	1.1.5.3
13.3657	13.7463	13.2577	14.4055	13.1608	13.1289	13.227	13.3615	13.2865	12.8558	14.3826	14.8915	13.2086	13.7931	13.6721	13.5905	12.8959	Flavodoxin_2	+	4.14363	0.0127222	Q64669	Q64669	NQO1_MOUSE	Nqo1	NAD(P)H dehydrogenase [quinone] 1	3gb_3db;3gb_3eb;3gb_ctrl;3gb_3ca;3gb_3da;3gb_3cb;3gb_3ea;3gb_3fa;3gb_3ba;3gb_3ha;3gb_3aa	aging [GO:0007568];cell redox homeostasis [GO:0045454];cellular response to hydrogen peroxide [GO:0070301];cellular response to metal ion [GO:0071248];cellular response to oxidative stress [GO:0034599];innate immune response [GO:0045087];NADH oxidation [GO:0006116];NADPH oxidation [GO:0070995];negative regulation of apoptotic process [GO:0043066];negative regulation of catalytic activity [GO:0043…	cytoplasm [GO:0005737];cytosol [GO:0005829];dendrite [GO:0030425];neuronal cell body [GO:0043025];nucleus [GO:0005634]	identical protein binding [GO:0042802];NAD(P)H dehydrogenase (quinone) activity [GO:0003955];NADH dehydrogenase (quinone) activity [GO:0050136];NADPH dehydrogenase (quinone) activity [GO:0008753];superoxide dismutase activity [GO:0004784]	cytoplasm [GO:0005737];cytosol [GO:0005829];dendrite [GO:0030425];neuronal cell body [GO:0043025];nucleus [GO:0005634];identical protein binding [GO:0042802];NAD(P)H dehydrogenase (quinone) activity [GO:0003955];NADH dehydrogenase (quinone) activity [GO:0050136];NADPH dehydrogenase (quinone) activity [GO:0008753];superoxide dismutase activity [GO:0004784];aging [GO:0007568];cell redox homeostasis…	GO:0000209;GO:0002931;GO:0003955;GO:0004784;GO:0005634;GO:0005737;GO:0005829;GO:0006116;GO:0006743;GO:0006801;GO:0006979;GO:0007568;GO:0007584;GO:0008753;GO:0009410;GO:0009725;GO:0009743;GO:0014075;GO:0019430;GO:0030163;GO:0030425;GO:0032355;GO:0032496;GO:0033574;GO:0034599;GO:0042177;GO:0042360;GO:0042373;GO:0042802;GO:0043025;GO:0043066;GO:0043086;GO:0043279;GO:0043525;GO:0045087;GO:0045454;GO:…	1.6.5.2
12.4153	12.0449	12.3879	12.1071	12.0643	12.389	12.1946	12.1193	12.0353	12.3466	12.1376	12.0465	12.073	12.101	12.7159	12.2441	11.8893	ATG_C;Chorein_N	+	7.51921	0	Q6P4T0	Q6P4T0	ATG2A_MOUSE	Atg2a	Autophagy-related protein 2 homolog A	3aa_ctrl;3ha_ctrl;3ha_3gb;3ha_3fb;3ha_3ea;3ha_3bb;3ha_3da;3ha_3ga;3ha_3fa;3ha_3ab;3ha_3ca;3ha_3cb;3ha_3ia	autophagosome assembly [GO:0000045];autophagy of mitochondrion [GO:0000422];late nucleophagy [GO:0044805];piecemeal microautophagy of the nucleus [GO:0034727];positive regulation of autophagosome assembly [GO:2000786];reticulophagy [GO:0061709]	endoplasmic reticulum membrane [GO:0005789];lipid droplet [GO:0005811];organelle membrane contact site [GO:0044232];phagophore assembly site [GO:0000407];phagophore assembly site membrane [GO:0034045]	lipid transfer activity [GO:0120013];phosphatidylinositol-3-phosphate binding [GO:0032266]	endoplasmic reticulum membrane [GO:0005789];lipid droplet [GO:0005811];organelle membrane contact site [GO:0044232];phagophore assembly site [GO:0000407];phagophore assembly site membrane [GO:0034045];lipid transfer activity [GO:0120013];phosphatidylinositol-3-phosphate binding [GO:0032266];autophagosome assembly [GO:0000045];autophagy of mitochondrion [GO:0000422];late nucleophagy [GO:0044805];p…	GO:0000045;GO:0000407;GO:0000422;GO:0005789;GO:0005811;GO:0032266;GO:0034045;GO:0034727;GO:0044232;GO:0044805;GO:0061709;GO:0120013;GO:2000786
11.7183	11.7401	11.5682	11.426	11.5148	11.5337	11.3896	11.504	11.7052	10.8186	11.6953	11.6128	11.6833	11.7358	12.0957	11.8411	11.5609	PEX11	+	3.56069	0.0287273	Q6P6M5	Q6P6M5	PX11C_MOUSE	Pex11g	Peroxisomal membrane protein 11C	3cb_3eb;3bb_3eb;3gb_3eb;3db_3eb;3da_3eb;3ba_3eb;3ea_3eb;3ab_3eb;3fa_3eb;ctrl_3eb;3ga_3eb;3fb_3eb;3aa_3eb;3ia_3eb;3ha_3eb	peroxisome fission [GO:0016559];regulation of peroxisome size [GO:0044375]	peroxisomal membrane [GO:0005778];peroxisome [GO:0005777];protein-containing complex [GO:0032991]		peroxisomal membrane [GO:0005778];peroxisome [GO:0005777];protein-containing complex [GO:0032991];peroxisome fission [GO:0016559];regulation of peroxisome size [GO:0044375]	GO:0005777;GO:0005778;GO:0016559;GO:0032991;GO:0044375
10.9575	9.24509	10.3964	9.69385	9.32639	10.1931	9.69485	9.4248	9.74013	9.82758	10.2184	9.14328	11.6752	9.41472	12.0568	9.32331	9.88192	IPK	+	6.38538	0.00111628	Q6PD10	Q6PD10	IP6K1_MOUSE	Ip6k1	Inositol hexakisphosphate kinase 1	3fa_3gb;3ha_3gb;3fa_3ab;3ha_3ab;3fa_3da;3ha_3da;3fa_3ia;3ha_3ia;3fa_3fb;3ha_3fb;3fa_3ca;3ha_3ca;3fa_3eb;3ha_3eb;3fa_3bb;3ha_3bb;3ha_3ea;3ha_3cb;3ha_ctrl;3ha_3ga	inositol metabolic process [GO:0006020];inositol phosphate biosynthetic process [GO:0032958];negative regulation of cold-induced thermogenesis [GO:0120163];phosphatidylinositol phosphate biosynthetic process [GO:0046854];phosphorylation [GO:0016310]	cytoplasm [GO:0005737];cytosol [GO:0005829];fibrillar center [GO:0001650];nucleoplasm [GO:0005654];nucleus [GO:0005634]	ATP binding [GO:0005524];inositol hexakisphosphate 1-kinase activity [GO:0052723];inositol hexakisphosphate 3-kinase activity [GO:0052724];inositol hexakisphosphate 5-kinase activity [GO:0000832];inositol hexakisphosphate kinase activity [GO:0000828];inositol-1,3,4,5,6-pentakisphosphate kinase activity [GO:0000827]	cytoplasm [GO:0005737];cytosol [GO:0005829];fibrillar center [GO:0001650];nucleoplasm [GO:0005654];nucleus [GO:0005634];ATP binding [GO:0005524];inositol hexakisphosphate 1-kinase activity [GO:0052723];inositol hexakisphosphate 3-kinase activity [GO:0052724];inositol hexakisphosphate 5-kinase activity [GO:0000832];inositol hexakisphosphate kinase activity [GO:0000828];inositol-1,3,4,5,6-pentakisp…	GO:0000827;GO:0000828;GO:0000832;GO:0001650;GO:0005524;GO:0005634;GO:0005654;GO:0005737;GO:0005829;GO:0006020;GO:0016310;GO:0032958;GO:0046854;GO:0052723;GO:0052724;GO:0120163	2.7.4.21
14.2216	13.6993	14.6318	13.932	13.9267	13.574	13.7463	13.5844	13.6731	13.7713	14.0785	13.8158	14.049	13.5821	14.3038	14.3023	13.8755	HlyIII	+	5.04889	0.00393103	Q6TCG2	Q6TCG2	PAQR9_MOUSE	Paqr9	Membrane progesterone receptor epsilon	3ba_3eb;3ba_3cb;3ba_3ab;3ba_3db;3ba_3fb;3ba_3ca;3ba_3ea;3ba_ctrl;3ba_3gb;3ba_3bb;3ba_3da		plasma membrane [GO:0005886]	signaling receptor activity [GO:0038023];steroid binding [GO:0005496]	plasma membrane [GO:0005886];signaling receptor activity [GO:0038023];steroid binding [GO:0005496]	GO:0005496;GO:0005886;GO:0038023
11.5139	10.0777	9.71309	9.74506	10.276	9.33696	10.117	9.92321	9.95181	9.87199	10.5946	10.401	10.3569	10.5573	10.2519	9.82582	9.88485	VKOR	+	3.95214	0.0160519	Q6TEK5	Q6TEK5	VKORL_MOUSE	Vkorc1l1	Vitamin K epoxide reductase complex subunit 1-like protein 1	3aa_3bb;3aa_3db;3aa_ctrl;3aa_3ab;3aa_3ia;3aa_3ca;3aa_3ba;3aa_3cb;3aa_3ea;3aa_3eb;3aa_3gb;3aa_3da	cellular response to oxidative stress [GO:0034599];peptidyl-glutamic acid carboxylation [GO:0017187];vitamin K metabolic process [GO:0042373]	endoplasmic reticulum [GO:0005783];endoplasmic reticulum membrane [GO:0005789]	quinone binding [GO:0048038];vitamin-K-epoxide reductase (warfarin-sensitive) activity [GO:0047057]	endoplasmic reticulum [GO:0005783];endoplasmic reticulum membrane [GO:0005789];quinone binding [GO:0048038];vitamin-K-epoxide reductase (warfarin-sensitive) activity [GO:0047057];cellular response to oxidative stress [GO:0034599];peptidyl-glutamic acid carboxylation [GO:0017187];vitamin K metabolic process [GO:0042373]	GO:0005783;GO:0005789;GO:0017187;GO:0034599;GO:0042373;GO:0047057;GO:0048038	1.17.4.4
13.833	13.6675	13.7821	13.6738	13.5072	13.8117	13.5405	13.8154	13.4757	13.7419	13.7687	13.9057	13.9033	14.1011	14.3685	13.7836	13.7792	Tubulin;Tubulin_C	+	5.46334	0.00226415	Q7TMM9	Q7TMM9;Q9CWF2	TBB2A_MOUSE	Tubb2a	Tubulin beta-2A chain	3db_3ea;3gb_3ea;3fa_3ea;3fb_3ea;3ha_3ea;3fb_3da;3ha_3da;3ha_3ca;3ha_3eb;3ha_3ab;3ha_3bb;3ha_3ga;3ha_ctrl;3ha_3cb	cerebral cortex development [GO:0021987];microtubule cytoskeleton organization [GO:0000226];mitotic cell cycle [GO:0000278]	cytoplasm [GO:0005737];intercellular bridge [GO:0045171];microtubule [GO:0005874];microtubule cytoskeleton [GO:0015630];mitotic spindle [GO:0072686]	GTP binding [GO:0005525];GTPase activity [GO:0003924];metal ion binding [GO:0046872];structural constituent of cytoskeleton [GO:0005200]	cytoplasm [GO:0005737];intercellular bridge [GO:0045171];microtubule [GO:0005874];microtubule cytoskeleton [GO:0015630];mitotic spindle [GO:0072686];GTP binding [GO:0005525];GTPase activity [GO:0003924];metal ion binding [GO:0046872];structural constituent of cytoskeleton [GO:0005200];cerebral cortex development [GO:0021987];microtubule cytoskeleton organization [GO:0000226];mitotic cell cycle [G…	GO:0000226;GO:0000278;GO:0003924;GO:0005200;GO:0005525;GO:0005737;GO:0005874;GO:0015630;GO:0021987;GO:0045171;GO:0046872;GO:0072686
13.6435	13.4494	12.6774	13.5968	11.9174	12.2797	12.0904	12.4576	12.2147	12.463	13.1092	12.8794	12.1775	13.0451	11.7505	11.9501	11.8924	Glutaredoxin	+	6.8105	0.000307692	Q80Y14	Q80Y14	GLRX5_MOUSE	Glrx5	Glutaredoxin-related protein 5, mitochondrial	3bb_ctrl;3ab_ctrl;3aa_ctrl;3bb_3ha;3ab_3ha;3aa_3ha;3bb_3fa;3ab_3fa;3aa_3fa;3bb_3da;3ab_3da;3aa_3da;3bb_3ia;3ab_3ia;3aa_3ia;3bb_3ca;3ab_3ca;3aa_3ca;3bb_3ea;3ab_3ea;3aa_3ea;3aa_3db	[2Fe-2S] cluster assembly [GO:0044571];hemopoiesis [GO:0030097];protein maturation by [2Fe-2S] cluster transfer [GO:0106034];protein maturation by [4Fe-4S] cluster transfer [GO:0106035]	dendrite [GO:0030425];iron-sulfur cluster assembly complex [GO:1990229];mitochondrial matrix [GO:0005759];mitochondrion [GO:0005739];neuronal cell body [GO:0043025];nucleus [GO:0005634]	2 iron, 2 sulfur cluster binding [GO:0051537];metal ion binding [GO:0046872]	dendrite [GO:0030425];iron-sulfur cluster assembly complex [GO:1990229];mitochondrial matrix [GO:0005759];mitochondrion [GO:0005739];neuronal cell body [GO:0043025];nucleus [GO:0005634];2 iron, 2 sulfur cluster binding [GO:0051537];metal ion binding [GO:0046872];[2Fe-2S] cluster assembly [GO:0044571];hemopoiesis [GO:0030097];protein maturation by [2Fe-2S] cluster transfer [GO:0106034];protein mat…	GO:0005634;GO:0005739;GO:0005759;GO:0030097;GO:0030425;GO:0043025;GO:0044571;GO:0046872;GO:0051537;GO:0106034;GO:0106035;GO:1990229
17.2208	17.0611	17.1418	17.0765	17.1687	17.0546	17.1394	17.1633	17.0693	17.1294	17.2693	17.1507	17.5377	17.5188	18.6108	17.8369	16.9874	Aldedh	+	10.7389	0	Q8BH00	Q8BH00	AL8A1_MOUSE	Aldh8a1	2-aminomuconic semialdehyde dehydrogenase	3ia_ctrl;3ha_ctrl;3ia_3bb;3ha_3bb;3ia_3ab;3ha_3ab;3ia_3db;3ha_3db;3ia_3ea;3ha_3ea;3ia_3eb;3ha_3eb;3ia_3ca;3ha_3ca;3ha_3ba;3ha_3gb;3ha_3cb;3ha_3da;3ha_3aa;3ha_3ga;3ha_3fa;3ha_3fb;3ha_3ia	9-cis-retinoic acid biosynthetic process [GO:0042904];L-kynurenine catabolic process [GO:0097053];retinal metabolic process [GO:0042574];retinoic acid metabolic process [GO:0042573]	cytoplasm [GO:0005737]	aminomuconate-semialdehyde dehydrogenase activity [GO:0047102];retinal dehydrogenase activity [GO:0001758]	cytoplasm [GO:0005737];aminomuconate-semialdehyde dehydrogenase activity [GO:0047102];retinal dehydrogenase activity [GO:0001758];9-cis-retinoic acid biosynthetic process [GO:0042904];L-kynurenine catabolic process [GO:0097053];retinal metabolic process [GO:0042574];retinoic acid metabolic process [GO:0042573]	GO:0001758;GO:0005737;GO:0042573;GO:0042574;GO:0042904;GO:0047102;GO:0097053	1.2.1.32
15.1231	14.8928	14.9936	15.0278	14.9558	14.9433	14.8922	14.7818	14.97	15.0522	14.9938	14.8823	15.4514	14.9383	15.8538	14.9394	14.8569	GMC_oxred_C;GMC_oxred_N	+	7.02306	0.000235294	Q8BJ64	Q8BJ64	CHDH_MOUSE	Chdh	Choline dehydrogenase, mitochondrial	3ha_3gb;3ha_3cb;3ha_3da;3ha_3ab;3ha_ctrl;3ha_3ea;3ha_3ca;3ha_3db;3ha_3bb;3ha_3fb;3ha_3ga;3ha_3eb;3ha_3ia;3ha_3ba;3ha_3aa;3ha_3fa	glycine betaine biosynthetic process from choline [GO:0019285]	mitochondrial inner membrane [GO:0005743];mitochondrion [GO:0005739]	choline dehydrogenase activity [GO:0008812];flavin adenine dinucleotide binding [GO:0050660]	mitochondrial inner membrane [GO:0005743];mitochondrion [GO:0005739];choline dehydrogenase activity [GO:0008812];flavin adenine dinucleotide binding [GO:0050660];glycine betaine biosynthetic process from choline [GO:0019285]	GO:0005739;GO:0005743;GO:0008812;GO:0019285;GO:0050660	1.1.99.1
12.8354	12.8612	13.4011	12.9978	12.7941	12.7387	12.7488	12.9027	12.7807	12.8713	12.8338	12.9869	12.8471	13.0862	13.1351	12.7046	12.8358	His_Phos_2	+	4.05564	0.0140541	Q8BP40	Q8BP40	PPA6_MOUSE	Acp6	Lysophosphatidic acid phosphatase type 6	3ba_3fa;3ba_3db;3ba_3ia;3ba_3ca;3ba_3ga;3ba_3ea;3ba_3aa;3ba_3da;3ba_ctrl;3ba_3ab;3ba_3eb;3ba_3cb;3ba_3gb	dephosphorylation [GO:0016311];hematopoietic progenitor cell differentiation [GO:0002244];lysobisphosphatidic acid metabolic process [GO:2001311];phospholipid metabolic process [GO:0006644]	cytoplasm [GO:0005737];mitochondrion [GO:0005739]	acid phosphatase activity [GO:0003993];lysophosphatidic acid phosphatase activity [GO:0052642]	cytoplasm [GO:0005737];mitochondrion [GO:0005739];acid phosphatase activity [GO:0003993];lysophosphatidic acid phosphatase activity [GO:0052642];dephosphorylation [GO:0016311];hematopoietic progenitor cell differentiation [GO:0002244];lysobisphosphatidic acid metabolic process [GO:2001311];phospholipid metabolic process [GO:0006644]	GO:0002244;GO:0003993;GO:0005737;GO:0005739;GO:0006644;GO:0016311;GO:0052642;GO:2001311	3.1.3.2
10.5562	9.4894	10.253	9.95499	9.47066	9.85061	10.2696	10.0709	9.62396	9.46323	10.3471	9.43226	10.1472	9.70448	10.9419	10.623	9.6961	adh_short	+	3.47887	0.0321333	Q8BTX9	Q8BTX9	HSDL1_MOUSE	Hsdl1	Inactive hydroxysteroid dehydrogenase-like protein 1	3ha_3eb;3ha_3gb		intermediate filament cytoskeleton [GO:0045111];intracellular membrane-bounded organelle [GO:0043231];mitochondrion [GO:0005739]		intermediate filament cytoskeleton [GO:0045111];intracellular membrane-bounded organelle [GO:0043231];mitochondrion [GO:0005739]	GO:0005739;GO:0043231;GO:0045111
13.5803	13.3795	13.5995	13.4827	13.436	13.6062	13.5831	13.6863	13.1633	13.5364	13.8615	13.5472	13.9493	13.8242	14.7052	13.8121	13.4906	GST_C_3;GST_N_3	+	7.30754	0	Q8BWM0	Q8BWM0	PGES2_MOUSE	Ptges2	Prostaglandin E synthase 2	3fb_3ea;3fa_3ea;3ha_3ea;3ha_3ab;3ha_3da;3ha_ctrl;3ha_3eb;3ha_3bb;3ha_3ca;3ha_3aa;3ha_3gb;3ha_3ba;3ha_3db;3ha_3cb;3ha_3ga;3ha_3ia;3ha_3fb;3ha_3fa	lipid metabolic process [GO:0006629];positive regulation of DNA-templated transcription [GO:0045893];prostaglandin biosynthetic process [GO:0001516];secretion [GO:0046903]	cytosol [GO:0005829];Golgi membrane [GO:0000139];mitochondrion [GO:0005739];nucleus [GO:0005634]	12-hydroxyheptadecatrienoic acid synthase activity [GO:0036134];DNA binding [GO:0003677];glutathione binding [GO:0043295];heme binding [GO:0020037];lyase activity [GO:0016829];prostaglandin-E synthase activity [GO:0050220]	cytosol [GO:0005829];Golgi membrane [GO:0000139];mitochondrion [GO:0005739];nucleus [GO:0005634];12-hydroxyheptadecatrienoic acid synthase activity [GO:0036134];DNA binding [GO:0003677];glutathione binding [GO:0043295];heme binding [GO:0020037];lyase activity [GO:0016829];prostaglandin-E synthase activity [GO:0050220];lipid metabolic process [GO:0006629];positive regulation of DNA-templated trans…	GO:0000139;GO:0001516;GO:0003677;GO:0005634;GO:0005739;GO:0005829;GO:0006629;GO:0016829;GO:0020037;GO:0036134;GO:0043295;GO:0045893;GO:0046903;GO:0050220	5.3.99.3
11.8108	11.8014	11.1558	11.7934	11.3591	11.7244	10.4306	10.9032	10.45	9.59112	11.1711	11.9347	10.9988	11.8509	9.56717	10.1788	9.4133	BolA	+	15.0128	0	Q8CEI1	Q8CEI1	BOLA3_MOUSE	Bola3	BolA-like protein 3	3cb_ctrl;3fa_ctrl;3ba_ctrl;3da_ctrl;3ga_ctrl;3db_ctrl;3aa_ctrl;3ab_ctrl;3bb_ctrl;3gb_ctrl;3fb_ctrl;3ba_3eb;3da_3eb;3ga_3eb;3db_3eb;3aa_3eb;3ab_3eb;3bb_3eb;3gb_3eb;3fb_3eb;3fa_3ha;3ba_3ha;3da_3ha;3ga_3ha;3db_3ha;3aa_3ha;3ab_3ha;3bb_3ha;3gb_3ha;3fb_3ha;3da_3ia;3ga_3ia;3db_3ia;3aa_3ia;3ab_3ia;3bb_3ia;3gb_3ia;3fb_3ia;3aa_3ca;3ab_3ca;3bb_3ca;3gb_3ca;3fb_3ca;3ab_3ea;3bb_3ea;3gb_3ea;3fb_3ea	protein maturation by [4Fe-4S] cluster transfer [GO:0106035]	cytosol [GO:0005829];iron-sulfur cluster assembly complex [GO:1990229];mitochondrial matrix [GO:0005759];mitochondrion [GO:0005739];nuclear body [GO:0016604]		cytosol [GO:0005829];iron-sulfur cluster assembly complex [GO:1990229];mitochondrial matrix [GO:0005759];mitochondrion [GO:0005739];nuclear body [GO:0016604];protein maturation by [4Fe-4S] cluster transfer [GO:0106035]	GO:0005739;GO:0005759;GO:0005829;GO:0016604;GO:0106035;GO:1990229
19.5938	19.4729	19.6367	19.7003	19.6027	19.5079	19.7677	20.0821	19.3068	19.4251	19.6476	19.6403	19.5402	20.4815	19.5749	19.5862	19.2538	p450	+	6.64193	0.000585366	Q8CIM7	Q8CIM7	CP2DQ_MOUSE	Cyp2d26	Cytochrome P450 2D26	3cb_3ea;3fb_3ea;3cb_ctrl;3fb_ctrl;3fb_3eb;3fb_3fa;3fb_3ab;3fb_3db;3fb_3da;3fb_3aa;3fb_3ha;3fb_3gb;3fb_3ga;3fb_3ia;3fb_3ba;3fb_3bb;3fb_3ca	arachidonic acid metabolic process [GO:0019369];response to xenobiotic stimulus [GO:0009410];xenobiotic metabolic process [GO:0006805]	cytoplasm [GO:0005737];endoplasmic reticulum membrane [GO:0005789];intracellular membrane-bounded organelle [GO:0043231];mitochondrion [GO:0005739]	anandamide 11,12 epoxidase activity [GO:0062188];anandamide 14,15 epoxidase activity [GO:0062189];anandamide 8,9 epoxidase activity [GO:0062187];aromatase activity [GO:0070330];heme binding [GO:0020037];iron ion binding [GO:0005506];monooxygenase activity [GO:0004497];oxidoreductase activity [GO:0016491];oxidoreductase activity, acting on paired donors, with incorporation or reduction of molecula…	cytoplasm [GO:0005737];endoplasmic reticulum membrane [GO:0005789];intracellular membrane-bounded organelle [GO:0043231];mitochondrion [GO:0005739];anandamide 11,12 epoxidase activity [GO:0062188];anandamide 14,15 epoxidase activity [GO:0062189];anandamide 8,9 epoxidase activity [GO:0062187];aromatase activity [GO:0070330];heme binding [GO:0020037];iron ion binding [GO:0005506];monooxygenase acti…	GO:0004497;GO:0005506;GO:0005737;GO:0005739;GO:0005789;GO:0006805;GO:0009410;GO:0016491;GO:0016712;GO:0019369;GO:0020037;GO:0043231;GO:0062187;GO:0062188;GO:0062189;GO:0070330	1.14.14.1
12.8704	13.093	12.9891	12.9947	12.8642	13.0739	12.7343	12.8449	12.8542	13.0064	12.9556	13.0351	12.8472	13.5362	12.9648	12.8982	13.0096	DUF619	+	8.44805	0	Q8R4H7	Q8R4H7	NAGS_MOUSE	Nags	N-acetylglutamate synthase, mitochondrial	3ab_3ca;3fb_3ca;3fb_3da;3fb_3ea;3fb_3fa;3fb_3aa;3fb_3ga;3fb_3cb;3fb_3ia;3fb_3eb;3fb_3ba;3fb_3gb;3fb_3bb;3fb_3ha;3fb_ctrl;3fb_3db;3fb_3ab	arginine biosynthetic process [GO:0006526];glutamate metabolic process [GO:0006536];urea cycle [GO:0000050]	mitochondrial matrix [GO:0005759];mitochondrion [GO:0005739]	acetyl-CoA:L-glutamate N-acetyltransferase activity [GO:0004042];methione N-acyltransferase activity [GO:0103045]	mitochondrial matrix [GO:0005759];mitochondrion [GO:0005739];acetyl-CoA:L-glutamate N-acetyltransferase activity [GO:0004042];methione N-acyltransferase activity [GO:0103045];arginine biosynthetic process [GO:0006526];glutamate metabolic process [GO:0006536];urea cycle [GO:0000050]	GO:0000050;GO:0004042;GO:0005739;GO:0005759;GO:0006526;GO:0006536;GO:0103045	2.3.1.1
11.6667	11.419	11.3583	11.3903	11.3353	11.1582	11.3075	11.4914	10.0701	11.3641	12.0123	11.1839	11.3884	8.99441	11.4578	12.0083	11.2745	PRA1	+	4.37887	0.00919403	Q8R5J9	Q8R5J9	PRAF3_MOUSE	Arl6ip5	PRA1 family protein 3	3cb_3fb;3eb_3fb;3bb_3fb;3ab_3fb;3da_3fb;3ha_3fb;3aa_3fb;3ia_3fb;3ga_3fb;3ga_3ea	cellular response to organic cyclic compound [GO:0071407];glutathione metabolic process [GO:0006749];intrinsic apoptotic signaling pathway in response to oxidative stress [GO:0008631];L-glutamate import across plasma membrane [GO:0098712];L-glutamate transmembrane transport [GO:0015813];learning or memory [GO:0007611];negative regulation of L-glutamate import across plasma membrane [GO:0002037];n…	cytoplasm [GO:0005737];cytoskeleton [GO:0005856];endoplasmic reticulum membrane [GO:0005789];membrane [GO:0016020];plasma membrane [GO:0005886];presynaptic cytosol [GO:0099523]	transmembrane transporter binding [GO:0044325]	cytoplasm [GO:0005737];cytoskeleton [GO:0005856];endoplasmic reticulum membrane [GO:0005789];membrane [GO:0016020];plasma membrane [GO:0005886];presynaptic cytosol [GO:0099523];transmembrane transporter binding [GO:0044325];cellular response to organic cyclic compound [GO:0071407];glutathione metabolic process [GO:0006749];intrinsic apoptotic signaling pathway in response to oxidative stress [GO:…	GO:0002037;GO:0005737;GO:0005789;GO:0005856;GO:0005886;GO:0006749;GO:0007611;GO:0008631;GO:0010917;GO:0015031;GO:0015813;GO:0016020;GO:0032874;GO:0036475;GO:0043065;GO:0043280;GO:0044325;GO:0051051;GO:0051580;GO:0071407;GO:0072659;GO:0098712;GO:0099523
9.90712	10.5788	10.0537	10.1525	9.02187	9.18306	8.59654	9.21738	9.14085	9.47593	9.27297	9.6023	9.20128	9.43606	8.31165	9.44272	9.22845		+	3.79405	0.0203457	Q8VC10	Q8VC10	OSGI1_MOUSE	Osgin1	Oxidative stress-induced growth inhibitor 1	3bb_3ha;3ab_3ha;3bb_3ca;3ab_3ca;3ab_ctrl;3ab_3ga;3ab_3db	cell differentiation [GO:0030154];negative regulation of cell growth [GO:0030308];regulation of apoptotic process [GO:0042981];regulation of cell migration [GO:0030334];regulation of cell population proliferation [GO:0042127]		growth factor activity [GO:0008083]	growth factor activity [GO:0008083];cell differentiation [GO:0030154];negative regulation of cell growth [GO:0030308];regulation of apoptotic process [GO:0042981];regulation of cell migration [GO:0030334];regulation of cell population proliferation [GO:0042127]	GO:0008083;GO:0030154;GO:0030308;GO:0030334;GO:0042127;GO:0042981
13.3483	13.0231	13.0738	12.9439	13.0014	12.9823	12.9427	13.0049	13.0596	12.9602	13.1177	13.0271	13.0777	13.0122	13.4944	13.0924	13.0582	ADH_zinc_N	+	3.8031	0.0201	Q8VDQ1	Q8VDQ1	PTGR2_MOUSE	Ptgr2	Prostaglandin reductase 2	3ha_3eb;3ha_3bb;3ha_3cb;3ha_3ca;3ha_3fb;3ha_ctrl;3ha_3db;3ha_3fa;3ha_3ba;3ha_3da;3ha_3ia;3ha_3ea;3ha_3ab;3ha_3ga	prostaglandin metabolic process [GO:0006693]	cytosol [GO:0005829];mitochondrion [GO:0005739]	13-prostaglandin reductase activity [GO:0036132];15-oxoprostaglandin 13-oxidase activity [GO:0047522]	cytosol [GO:0005829];mitochondrion [GO:0005739];13-prostaglandin reductase activity [GO:0036132];15-oxoprostaglandin 13-oxidase activity [GO:0047522];prostaglandin metabolic process [GO:0006693]	GO:0005739;GO:0005829;GO:0006693;GO:0036132;GO:0047522	1.3.1.48
12.5369	12.7209	12.5249	12.9544	12.4296	13.0247	12.7295	12.7949	12.6233	12.514	12.5783	13.2416	12.3988	13.036	12.615	12.4081	12.4443	NAD_binding_1	+	6.25985	0.00109091	Q8VE38	Q8VE38	OXND1_MOUSE	Oxnad1	Oxidoreductase NAD-binding domain-containing protein 1	3fb_3eb;3gb_3eb;3db_3ia;3fb_3ia;3gb_3ia;3db_3da;3fb_3da;3gb_3da;3db_ctrl;3fb_ctrl;3gb_ctrl;3db_3fa;3fb_3fa;3gb_3fa;3db_3ba;3fb_3ba;3gb_3ba;3fb_3aa;3gb_3aa;3fb_3ga;3gb_3ga		mitochondrion [GO:0005739]	oxidoreductase activity [GO:0016491]	mitochondrion [GO:0005739];oxidoreductase activity [GO:0016491]	GO:0005739;GO:0016491	1.-.-.-
13.0058	13.4613	12.9811	13.995	13.4288	13.5574	13.0005	12.9904	12.8965	11.3478	12.7426	13.2054	12.3283	13.6252	11.7097	11.473	12.1199	CIAPIN1	+	4.87771	0.00465574	Q8WTY4	Q8WTY4	CPIN1_MOUSE	Ciapin1	Anamorsin	3db_3eb;3ab_3eb;3fb_3eb;3bb_3eb;3ab_3ia;3fb_3ia;3bb_3ia;3fb_3ha;3bb_3ha	apoptotic process [GO:0006915];hemopoiesis [GO:0030097];iron-sulfur cluster assembly [GO:0016226];negative regulation of apoptotic process [GO:0043066];sequestering of metal ion [GO:0051238]	cytoplasm [GO:0005737];mitochondrial intermembrane space [GO:0005758];mitochondrion [GO:0005739];nucleolus [GO:0005730];nucleoplasm [GO:0005654]	2 iron, 2 sulfur cluster binding [GO:0051537];4 iron, 4 sulfur cluster binding [GO:0051539];electron transfer activity [GO:0009055];metal ion binding [GO:0046872];methyltransferase activity [GO:0008168]	cytoplasm [GO:0005737];mitochondrial intermembrane space [GO:0005758];mitochondrion [GO:0005739];nucleolus [GO:0005730];nucleoplasm [GO:0005654];2 iron, 2 sulfur cluster binding [GO:0051537];4 iron, 4 sulfur cluster binding [GO:0051539];electron transfer activity [GO:0009055];metal ion binding [GO:0046872];methyltransferase activity [GO:0008168];apoptotic process [GO:0006915];hemopoiesis [GO:0030…	GO:0005654;GO:0005730;GO:0005737;GO:0005739;GO:0005758;GO:0006915;GO:0008168;GO:0009055;GO:0016226;GO:0030097;GO:0043066;GO:0046872;GO:0051238;GO:0051537;GO:0051539
15.5525	15.461	15.5041	15.7145	15.6581	15.6426	15.6363	15.6156	15.5315	15.5675	15.5248	15.8848	15.4431	16.3268	15.3434	15.4748	15.6239	DUF1982;Molybdopterin;NADH-G_4Fe-4S_3	+	3.69384	0.0224471	Q91VD9	Q91VD9	NDUS1_MOUSE	Ndufs1	NADH-ubiquinone oxidoreductase 75 kDa subunit, mitochondrial	3gb_3ha;3fb_3ha;3fb_3fa;3fb_3ia;3fb_3ea;3fb_3ab;3fb_3ba;3fb_3ga;3fb_ctrl;3fb_3aa;3fb_3ca;3fb_3eb	aerobic respiration [GO:0009060];apoptotic mitochondrial changes [GO:0008637];ATP metabolic process [GO:0046034];cellular respiration [GO:0045333];mitochondrial electron transport, NADH to ubiquinone [GO:0006120];mitochondrial respiratory chain complex I assembly [GO:0032981];proton motive force-driven mitochondrial ATP synthesis [GO:0042776];reactive oxygen species metabolic process [GO:0072593]…	mitochondrial inner membrane [GO:0005743];mitochondrial intermembrane space [GO:0005758];mitochondrial respiratory chain complex I [GO:0005747];mitochondrion [GO:0005739];myelin sheath [GO:0043209]	2 iron, 2 sulfur cluster binding [GO:0051537];4 iron, 4 sulfur cluster binding [GO:0051539];electron transfer activity [GO:0009055];metal ion binding [GO:0046872];NADH dehydrogenase (ubiquinone) activity [GO:0008137]	mitochondrial inner membrane [GO:0005743];mitochondrial intermembrane space [GO:0005758];mitochondrial respiratory chain complex I [GO:0005747];mitochondrion [GO:0005739];myelin sheath [GO:0043209];2 iron, 2 sulfur cluster binding [GO:0051537];4 iron, 4 sulfur cluster binding [GO:0051539];electron transfer activity [GO:0009055];metal ion binding [GO:0046872];NADH dehydrogenase (ubiquinone) activi…	GO:0005739;GO:0005743;GO:0005747;GO:0005758;GO:0006120;GO:0008137;GO:0008637;GO:0009055;GO:0009060;GO:0032981;GO:0042776;GO:0043209;GO:0045333;GO:0046034;GO:0046872;GO:0051537;GO:0051539;GO:0051881;GO:0072593	7.1.1.2
15.672	15.5296	15.5485	15.6404	16.2523	15.703	15.7542	15.7594	15.5896	15.5272	15.788	15.6787	15.641	15.6589	15.5695	15.6971	15.7677	Complex1_49kDa	+	3.7529	0.0213659	Q91WD5	Q91WD5	NDUS2_MOUSE	Ndufs2	NADH dehydrogenase [ubiquinone] iron-sulfur protein 2, mitochondrial	3da_3ha;3da_3fa;3da_3ba;3da_3ea;3da_3ab;3da_3fb;3da_3db;3da_3bb;3da_3gb;3da_3eb;3da_3ca;3da_3aa;3da_3cb;3da_3ia	aerobic respiration [GO:0009060];cellular response to oxygen levels [GO:0071453];gliogenesis [GO:0042063];mitochondrial ATP synthesis coupled electron transport [GO:0042775];mitochondrial electron transport, NADH to ubiquinone [GO:0006120];mitochondrial respiratory chain complex I assembly [GO:0032981];neural precursor cell proliferation [GO:0061351];neurogenesis [GO:0022008];proton motive force-…	mitochondrial inner membrane [GO:0005743];mitochondrial respiratory chain complex I [GO:0005747];mitochondrion [GO:0005739];nucleoplasm [GO:0005654]	4 iron, 4 sulfur cluster binding [GO:0051539];metal ion binding [GO:0046872];NAD binding [GO:0051287];NADH dehydrogenase (ubiquinone) activity [GO:0008137];NADH dehydrogenase activity [GO:0003954];oxygen sensor activity [GO:0019826];quinone binding [GO:0048038];ubiquitin protein ligase binding [GO:0031625]	mitochondrial inner membrane [GO:0005743];mitochondrial respiratory chain complex I [GO:0005747];mitochondrion [GO:0005739];nucleoplasm [GO:0005654];4 iron, 4 sulfur cluster binding [GO:0051539];metal ion binding [GO:0046872];NAD binding [GO:0051287];NADH dehydrogenase (ubiquinone) activity [GO:0008137];NADH dehydrogenase activity [GO:0003954];oxygen sensor activity [GO:0019826];quinone binding […	GO:0003954;GO:0005654;GO:0005739;GO:0005743;GO:0005747;GO:0006120;GO:0006979;GO:0008137;GO:0009060;GO:0019826;GO:0022008;GO:0031625;GO:0032981;GO:0042063;GO:0042775;GO:0042776;GO:0046872;GO:0048038;GO:0051287;GO:0051539;GO:0061351;GO:0071453	7.1.1.2
16.215	16.6188	16.0902	17.4773	16.2815	16.4536	16.0345	16.4901	16.0595	15.9395	16.2415	17.4324	15.9453	17.1863	15.9601	16.0387	15.8975	MitoNEET_N;zf-CDGSH	+	4.10086	0.0134795	Q91WS0	Q91WS0	CISD1_MOUSE	Cisd1	CDGSH iron-sulfur domain-containing protein 1	3fb_3fa;3bb_3fa;3gb_3fa;3gb_3eb;3bb_3ha;3gb_3ha;3bb_3ea;3gb_3ea	protein maturation by [2Fe-2S] cluster transfer [GO:0106034];regulation of autophagy [GO:0010506];regulation of cellular respiration [GO:0043457]	cytoplasmic side of mitochondrial outer membrane [GO:0032473];mitochondrial outer membrane [GO:0005741];mitochondrion [GO:0005739]	2 iron, 2 sulfur cluster binding [GO:0051537];identical protein binding [GO:0042802];iron ion binding [GO:0005506];L-cysteine transaminase activity [GO:0047801];protein homodimerization activity [GO:0042803];pyridoxal phosphate binding [GO:0030170]	cytoplasmic side of mitochondrial outer membrane [GO:0032473];mitochondrial outer membrane [GO:0005741];mitochondrion [GO:0005739];2 iron, 2 sulfur cluster binding [GO:0051537];identical protein binding [GO:0042802];iron ion binding [GO:0005506];L-cysteine transaminase activity [GO:0047801];protein homodimerization activity [GO:0042803];pyridoxal phosphate binding [GO:0030170];protein maturation …	GO:0005506;GO:0005739;GO:0005741;GO:0010506;GO:0030170;GO:0032473;GO:0042802;GO:0042803;GO:0043457;GO:0047801;GO:0051537;GO:0106034	2.6.1.3
16.3961	16.3549	16.3339	16.2307	16.1384	16.2211	16.1542	16.3502	16.1286	16.1883	16.6784	16.4266	16.0854	16.204	16.3006	16.9133	16.3428	COesterase	+	4.2878	0.010029	Q91WU0	Q91WU0	EST1F_MOUSE	Ces1f	Carboxylesterase 1F	3ia_3fa;3ia_3da;3ia_3fb;3ia_3eb;3ia_3db;3ia_3ca;3ia_3ea;3ia_3ba;3ia_ctrl;3ia_3ha;3ia_3bb;3ia_3cb;3ia_3ab	cellular response to cholesterol [GO:0071397];cellular response to low-density lipoprotein particle stimulus [GO:0071404];cholesterol biosynthetic process [GO:0006695];cholesterol homeostasis [GO:0042632];cholesterol metabolic process [GO:0008203];epithelial cell differentiation [GO:0030855];lipid catabolic process [GO:0016042];medium-chain fatty acid metabolic process [GO:0051791];negative regul…	cytoplasm [GO:0005737];cytosol [GO:0005829];endoplasmic reticulum [GO:0005783];intracellular membrane-bounded organelle [GO:0043231];lipid droplet [GO:0005811]	all-trans-retinyl-palmitate hydrolase, all-trans-retinol forming activity [GO:0047376];carboxylesterase activity [GO:0106435];carboxylic ester hydrolase activity [GO:0052689];retinyl-palmitate esterase activity [GO:0050253];sterol esterase activity [GO:0004771]	cytoplasm [GO:0005737];cytosol [GO:0005829];endoplasmic reticulum [GO:0005783];intracellular membrane-bounded organelle [GO:0043231];lipid droplet [GO:0005811];all-trans-retinyl-palmitate hydrolase, all-trans-retinol forming activity [GO:0047376];carboxylesterase activity [GO:0106435];carboxylic ester hydrolase activity [GO:0052689];retinyl-palmitate esterase activity [GO:0050253];sterol esterase…	GO:0004771;GO:0005737;GO:0005783;GO:0005811;GO:0005829;GO:0006695;GO:0008203;GO:0010875;GO:0010887;GO:0016042;GO:0019626;GO:0030855;GO:0042632;GO:0043231;GO:0043691;GO:0047376;GO:0050253;GO:0051791;GO:0052689;GO:0070857;GO:0071397;GO:0071404;GO:0090205;GO:0106435;GO:0120188	3.1.1.1
17.4861	17.7957	17.4951	18.096	17.5247	17.8984	17.3548	17.8347	17.3817	17.1471	17.6143	18.3332	17.472	18.6572	17.7367	17.2171	17.4507	Hemopexin	+	5.099	0.00350877	Q91X72	Q91X72	HEMO_MOUSE	Hpx	Hemopexin	3gb_3fa;3fb_3fa;3fb_3eb;3fb_3ia;3fb_3da;3fb_3ea;3fb_ctrl;3fb_3ca;3fb_3ba;3fb_3aa;3fb_3ha;3fb_3ga	heme metabolic process [GO:0042168];hemoglobin metabolic process [GO:0020027];intracellular iron ion homeostasis [GO:0006879];positive regulation of humoral immune response mediated by circulating immunoglobulin [GO:0002925];positive regulation of immunoglobulin production [GO:0002639];positive regulation of response to type II interferon [GO:0060332];positive regulation of type II interferon-med…	extracellular space [GO:0005615]	heme binding [GO:0020037];heme transmembrane transporter activity [GO:0015232];metal ion binding [GO:0046872]	extracellular space [GO:0005615];heme binding [GO:0020037];heme transmembrane transporter activity [GO:0015232];metal ion binding [GO:0046872];heme metabolic process [GO:0042168];hemoglobin metabolic process [GO:0020027];intracellular iron ion homeostasis [GO:0006879];positive regulation of humoral immune response mediated by circulating immunoglobulin [GO:0002925];positive regulation of immunogl…	GO:0002639;GO:0002925;GO:0005615;GO:0006879;GO:0007260;GO:0015232;GO:0020027;GO:0020037;GO:0042168;GO:0042531;GO:0046872;GO:0051246;GO:0060332;GO:0060333;GO:0060335
14.0872	14.2866	14.0846	15.0498	13.6321	13.5371	13.5115	13.6072	13.3249	13.5026	14.0339	13.5239	13.6588	13.6653	13.8891	14.0363	13.557	DAO	+	12.4562	0	Q91YP0	Q91YP0	L2HDH_MOUSE	L2hgdh	L-2-hydroxyglutarate dehydrogenase, mitochondrial	3ga_3ea;3aa_3ea;3ba_3ea;3ia_3ea;3ab_3ea;3bb_3ea;3ia_3gb;3ab_3gb;3bb_3gb;3ia_3ca;3ab_3ca;3bb_3ca;3ab_3eb;3bb_3eb;3ab_ctrl;3bb_ctrl;3ab_3db;3bb_3db;3ab_3cb;3bb_3cb;3ab_3fa;3bb_3fa;3bb_3da;3bb_3fb;3bb_3ha;3bb_3ga;3bb_3aa;3bb_3ba;3bb_3ia;3bb_3ab	small molecule metabolic process [GO:0044281]	membrane [GO:0016020];mitochondrion [GO:0005739]	2-hydroxyglutarate dehydrogenase activity [GO:0047545]	membrane [GO:0016020];mitochondrion [GO:0005739];2-hydroxyglutarate dehydrogenase activity [GO:0047545];small molecule metabolic process [GO:0044281]	GO:0005739;GO:0016020;GO:0044281;GO:0047545	1.1.99.2
15.7202	15.9193	15.5779	16.3372	16.1762	16.6777	16.4432	16.7783	16.3302	15.834	15.7436	17.0435	16.4591	18.0448	16.2532	15.5632	15.6721	Complex1_51K;NADH_4Fe-4S;SLBB	+	7.81489	0	Q91YT0	Q91YT0	NDUV1_MOUSE	Ndufv1	NADH dehydrogenase [ubiquinone] flavoprotein 1, mitochondrial	3gb_3ia;3fb_3ia;3gb_3ba;3fb_3ba;3gb_ctrl;3fb_ctrl;3fb_3ga;3fb_3eb;3fb_3aa;3fb_3ab;3fb_3da;3fb_3ea;3fb_3ha;3fb_3bb;3fb_3ca;3fb_3fa;3fb_3cb	aerobic respiration [GO:0009060];mitochondrial ATP synthesis coupled electron transport [GO:0042775];mitochondrial electron transport, NADH to ubiquinone [GO:0006120];proton motive force-driven mitochondrial ATP synthesis [GO:0042776]	cytosol [GO:0005829];mitochondrial inner membrane [GO:0005743];mitochondrial respiratory chain complex I [GO:0005747];mitochondrion [GO:0005739]	4 iron, 4 sulfur cluster binding [GO:0051539];FMN binding [GO:0010181];metal ion binding [GO:0046872];NAD binding [GO:0051287];NADH dehydrogenase (ubiquinone) activity [GO:0008137]	cytosol [GO:0005829];mitochondrial inner membrane [GO:0005743];mitochondrial respiratory chain complex I [GO:0005747];mitochondrion [GO:0005739];4 iron, 4 sulfur cluster binding [GO:0051539];FMN binding [GO:0010181];metal ion binding [GO:0046872];NAD binding [GO:0051287];NADH dehydrogenase (ubiquinone) activity [GO:0008137];aerobic respiration [GO:0009060];mitochondrial ATP synthesis coupled elec…	GO:0005739;GO:0005743;GO:0005747;GO:0005829;GO:0006120;GO:0008137;GO:0009060;GO:0010181;GO:0042775;GO:0042776;GO:0046872;GO:0051287;GO:0051539	7.1.1.2
15.1721	14.9701	15.1059	15.1016	14.9777	14.7908	14.903	15.0351	14.788	14.9526	15.3738	15.0541	15.5766	15.5022	15.5146	15.1206	14.7548	ETF_QO	+	5.30521	0.0025	Q921G7	Q921G7	ETFD_MOUSE	Etfdh	Electron transfer flavoprotein-ubiquinone oxidoreductase, mitochondrial	3fa_3ea;3fb_3ea;3ha_3ea;3fa_ctrl;3fb_ctrl;3ha_ctrl;3fa_3ca;3fb_3ca;3ha_3ca;3fa_3db;3fb_3db;3ha_3db;3fb_3ab;3ha_3ab	electron transport chain [GO:0022900];fatty acid beta-oxidation using acyl-CoA dehydrogenase [GO:0033539];response to oxidative stress [GO:0006979]	membrane [GO:0016020];mitochondrial electron transfer flavoprotein complex [GO:0017133];mitochondrial inner membrane [GO:0005743];mitochondrial membrane [GO:0031966];mitochondrion [GO:0005739]	4 iron, 4 sulfur cluster binding [GO:0051539];electron transfer activity [GO:0009055];electron-transferring-flavoprotein dehydrogenase activity [GO:0004174];iron-sulfur cluster binding [GO:0051536];metal ion binding [GO:0046872];oxidoreductase activity [GO:0016491];quinone binding [GO:0048038];ubiquinone binding [GO:0048039]	membrane [GO:0016020];mitochondrial electron transfer flavoprotein complex [GO:0017133];mitochondrial inner membrane [GO:0005743];mitochondrial membrane [GO:0031966];mitochondrion [GO:0005739];4 iron, 4 sulfur cluster binding [GO:0051539];electron transfer activity [GO:0009055];electron-transferring-flavoprotein dehydrogenase activity [GO:0004174];iron-sulfur cluster binding [GO:0051536];metal io…	GO:0004174;GO:0005739;GO:0005743;GO:0006979;GO:0009055;GO:0016020;GO:0016491;GO:0017133;GO:0022900;GO:0031966;GO:0033539;GO:0046872;GO:0048038;GO:0048039;GO:0051536;GO:0051539	1.5.5.1
13.2057	12.9878	13.0357	13.1766	13.2879	13.5571	13.1531	13.6859	12.8578	12.6695	13.9204	14.4016	13.6338	14.4039	13.2573	13.4017	12.9391	F420_oxidored;Ferric_reduct	+	7.87128	0	Q923B6	Q923B6	STEA4_MOUSE	Steap4	Metalloreductase STEAP4	3ga_3eb;3gb_3eb;3fb_3eb;3ga_3ea;3gb_3ea;3fb_3ea;3ga_ctrl;3gb_ctrl;3fb_ctrl;3gb_3ca;3fb_3ca;3gb_3ba;3fb_3ba;3gb_3ab;3fb_3ab;3gb_3bb;3fb_3bb;3gb_3aa;3fb_3aa;3gb_3ia;3fb_3ia;3fb_3ha;3fb_3da	copper ion import [GO:0015677];fat cell differentiation [GO:0045444];iron import into cell [GO:0033212];iron ion import across cell outer membrane [GO:0098706];protein homotrimerization [GO:0070207]	early endosome membrane [GO:0031901];endosome [GO:0005768];Golgi membrane [GO:0000139];membrane [GO:0016020];nucleoplasm [GO:0005654];plasma membrane [GO:0005886]	cupric reductase activity [GO:0008823];electron transfer activity [GO:0009055];FAD binding [GO:0071949];ferric-chelate reductase (NADPH) activity [GO:0052851];heme binding [GO:0020037];metal ion binding [GO:0046872]	early endosome membrane [GO:0031901];endosome [GO:0005768];Golgi membrane [GO:0000139];membrane [GO:0016020];nucleoplasm [GO:0005654];plasma membrane [GO:0005886];cupric reductase activity [GO:0008823];electron transfer activity [GO:0009055];FAD binding [GO:0071949];ferric-chelate reductase (NADPH) activity [GO:0052851];heme binding [GO:0020037];metal ion binding [GO:0046872];copper ion import [G…	GO:0000139;GO:0005654;GO:0005768;GO:0005886;GO:0008823;GO:0009055;GO:0015677;GO:0016020;GO:0020037;GO:0031901;GO:0033212;GO:0045444;GO:0046872;GO:0052851;GO:0070207;GO:0071949;GO:0098706	1.16.1.9
10.4919	11.3825	10.3227	10.9684	10.6027	10.0891	10.3455	10.2136	10.3674	10.3759	10.2357	11.0881	10.7194	12.3099	10.8215	10.8412	10.3883	GIDA;GIDA_assoc_3	+	5.52416	0.002	Q923Z3	Q923Z3	MTO1_MOUSE	Mto1	Protein MTO1 homolog, mitochondrial	3fb_3eb;3fb_3ga;3fb_3db;3fb_3cb;3fb_3aa;3fb_ctrl;3fb_3ca;3fb_3ba;3fb_3ea;3fb_3da;3fb_3ha;3fb_3fa;3fb_3ia	mitochondrial tRNA wobble uridine modification [GO:0070899];tRNA methylation [GO:0030488];tRNA wobble uridine modification [GO:0002098]	cytosol [GO:0005829];mitochondrion [GO:0005739]	flavin adenine dinucleotide binding [GO:0050660]	cytosol [GO:0005829];mitochondrion [GO:0005739];flavin adenine dinucleotide binding [GO:0050660];mitochondrial tRNA wobble uridine modification [GO:0070899];tRNA methylation [GO:0030488];tRNA wobble uridine modification [GO:0002098]	GO:0002098;GO:0005739;GO:0005829;GO:0030488;GO:0050660;GO:0070899
17.2424	17.2274	17.3488	17.2554	17.2358	17.2956	17.3362	17.2019	17.2431	17.3522	18.3066	17.1922	17.1686	17.2235	17.2571	20.0489	17.2692	CRAL_TRIO;CRAL_TRIO_N	+	16.1074	0	Q99J08	Q99J08	S14L2_MOUSE	Sec14l2	SEC14-like protein 2	3ga_3fa;3ia_3fa;3ga_3gb;3ia_3gb;3ga_3da;3ia_3da;3ga_3ab;3ia_3ab;3ga_3bb;3ia_3bb;3ga_3fb;3ia_3fb;3ga_3cb;3ia_3cb;3ga_3ha;3ia_3ha;3ga_3ea;3ia_3ea;3ga_3ca;3ia_3ca;3ga_3aa;3ia_3aa;3ga_ctrl;3ia_ctrl;3ga_3db;3ia_3db;3ga_3ba;3ia_3ba;3ga_3eb;3ia_3eb;3ia_3ga	positive regulation of cholesterol biosynthetic process [GO:0045542]	cytoplasm [GO:0005737];cytosol [GO:0005829];nucleoplasm [GO:0005654]	enzyme activator activity [GO:0008047];lipid binding [GO:0008289];transferase activity, transferring alkyl or aryl (other than methyl) groups [GO:0016765]	cytoplasm [GO:0005737];cytosol [GO:0005829];nucleoplasm [GO:0005654];enzyme activator activity [GO:0008047];lipid binding [GO:0008289];transferase activity, transferring alkyl or aryl (other than methyl) groups [GO:0016765];positive regulation of cholesterol biosynthetic process [GO:0045542]	GO:0005654;GO:0005737;GO:0005829;GO:0008047;GO:0008289;GO:0016765;GO:0045542
13.1084	12.543	12.9597	12.6886	12.6914	12.7642	12.6141	12.7858	12.5434	12.7005	12.9243	12.5263	12.8197	12.4618	13.6031	12.9057	12.5346	DER1	+	5.40692	0.00218182	Q99J56	Q99J56	DERL1_MOUSE	Derl1	Derlin-1	3ha_ctrl;3ha_3fb;3ha_3ab;3ha_3bb;3ha_3ca;3ha_3gb;3ha_3eb;3ha_3cb;3ha_3db;3ha_3fa;3ha_3ea;3ha_3da;3ha_3ba	cellular response to unfolded protein [GO:0034620];endoplasmic reticulum unfolded protein response [GO:0030968];ER-associated misfolded protein catabolic process [GO:0071712];ERAD pathway [GO:0036503];positive regulation of protein binding [GO:0032092];positive regulation of protein ubiquitination [GO:0031398];proteasome-mediated ubiquitin-dependent protein catabolic process [GO:0043161];protein …	Derlin-1 retrotranslocation complex [GO:0036513];Derlin-1-VIMP complex [GO:0036502];early endosome [GO:0005769];endoplasmic reticulum [GO:0005783];endoplasmic reticulum membrane [GO:0005789];endoplasmic reticulum quality control compartment [GO:0044322];Hrd1p ubiquitin ligase ERAD-L complex [GO:0000839];late endosome [GO:0005770];membrane [GO:0016020]	ATPase binding [GO:0051117];identical protein binding [GO:0042802];MHC class I protein binding [GO:0042288];misfolded protein binding [GO:0051787];protease binding [GO:0002020];protein-containing complex binding [GO:0044877];signal recognition particle binding [GO:0005047];ubiquitin protein ligase binding [GO:0031625];ubiquitin-specific protease binding [GO:1990381]	Derlin-1 retrotranslocation complex [GO:0036513];Derlin-1-VIMP complex [GO:0036502];early endosome [GO:0005769];endoplasmic reticulum [GO:0005783];endoplasmic reticulum membrane [GO:0005789];endoplasmic reticulum quality control compartment [GO:0044322];Hrd1p ubiquitin ligase ERAD-L complex [GO:0000839];late endosome [GO:0005770];membrane [GO:0016020];ATPase binding [GO:0051117];identical protein…	GO:0000839;GO:0002020;GO:0005047;GO:0005769;GO:0005770;GO:0005783;GO:0005789;GO:0006986;GO:0016020;GO:0030433;GO:0030968;GO:0030970;GO:0031398;GO:0031625;GO:0031648;GO:0032092;GO:0034620;GO:0036502;GO:0036503;GO:0036513;GO:0042288;GO:0042802;GO:0043161;GO:0044322;GO:0044877;GO:0051117;GO:0051787;GO:0071712;GO:1990381
12.2756	11.9456	12.0294	12.1156	12.1295	12.2373	12.0703	12.1766	12.0142	11.8529	13.8954	12.5064	13.1323	12.7349	13.4773	12.9868	11.8677	RPE65	+	6.94146	0.000216216	Q99NF1	Q99NF1	BCDO2_MOUSE	Bco2	Carotenoid-cleaving dioxygenase, mitochondrial	3fa_3ea;3ha_3ea;3ga_3ea;3ha_3ab;3ga_3ab;3ha_3eb;3ga_3eb;3ha_ctrl;3ga_ctrl;3ha_3bb;3ga_3bb;3ha_3da;3ga_3da;3ha_3ca;3ga_3ca;3ha_3cb;3ga_3cb;3ga_3ba;3ga_3aa;3ga_3db;3ga_3gb	carotene catabolic process [GO:0016121];carotene metabolic process [GO:0016119];carotenoid metabolic process [GO:0016116];lutein catabolic process [GO:0062172];lycopene catabolic process [GO:1901176];regulation of mitochondrial membrane potential [GO:0051881];regulation of reactive oxygen species metabolic process [GO:2000377];retinal metabolic process [GO:0042574];retinoic acid metabolic process…	mitochondrion [GO:0005739]	9,10 (9', 10')-carotenoid-cleaving dioxygenase activity [GO:0010437];beta,beta-carotene-9',10'-cleaving oxygenase activity [GO:0102076];beta-carotene 15,15'-dioxygenase activity [GO:0003834];carotenoid dioxygenase activity [GO:0010436];metal ion binding [GO:0046872];oxidoreductase activity, acting on single donors with incorporation of molecular oxygen, incorporation of two atoms of oxygen [GO:00…	mitochondrion [GO:0005739];9,10 (9', 10')-carotenoid-cleaving dioxygenase activity [GO:0010437];beta,beta-carotene-9',10'-cleaving oxygenase activity [GO:0102076];beta-carotene 15,15'-dioxygenase activity [GO:0003834];carotenoid dioxygenase activity [GO:0010436];metal ion binding [GO:0046872];oxidoreductase activity, acting on single donors with incorporation of molecular oxygen, incorporation of…	GO:0003834;GO:0005739;GO:0010436;GO:0010437;GO:0016116;GO:0016119;GO:0016121;GO:0016122;GO:0016124;GO:0016702;GO:0042573;GO:0042574;GO:0046872;GO:0051881;GO:0062172;GO:0102076;GO:1901176;GO:1901826;GO:2000377	1.13.11.-;1.13.11.71
14.0682	13.9061	13.8928	13.9723	14.1008	13.8363	13.842	13.9802	13.9696	13.8589	14.2593	14.07	13.975	14.9641	15.1417	14.0399	13.9641	Prenylcys_lyase	+	6.95457	0.000222222	Q9CQF9	Q9CQF9	PCYOX_MOUSE	Pcyox1	Prenylcysteine oxidase 1	3fb_3db;3ha_3db;3fb_3fa;3ha_3fa;3fb_ctrl;3ha_ctrl;3fb_3ca;3ha_3ca;3fb_3ba;3ha_3ba;3fb_3eb;3ha_3eb;3fb_3ab;3ha_3ab;3fb_3ea;3ha_3ea;3fb_3gb;3ha_3gb;3fb_3cb;3ha_3cb;3fb_3da;3ha_3da;3fb_3ia;3ha_3ia;3fb_3bb;3ha_3bb;3ha_3aa;3ha_3ga	chloride transmembrane transport [GO:1902476];prenylated protein catabolic process [GO:0030327];prenylcysteine catabolic process [GO:0030328]	lysosome [GO:0005764];plasma membrane [GO:0005886];very-low-density lipoprotein particle [GO:0034361]	FAD binding [GO:0071949];farnesylcysteine lyase activity [GO:0102149];prenylcysteine oxidase activity [GO:0001735]	lysosome [GO:0005764];plasma membrane [GO:0005886];very-low-density lipoprotein particle [GO:0034361];FAD binding [GO:0071949];farnesylcysteine lyase activity [GO:0102149];prenylcysteine oxidase activity [GO:0001735];chloride transmembrane transport [GO:1902476];prenylated protein catabolic process [GO:0030327];prenylcysteine catabolic process [GO:0030328]	GO:0001735;GO:0005764;GO:0005886;GO:0030327;GO:0030328;GO:0034361;GO:0071949;GO:0102149;GO:1902476	1.8.3.5
13.7611	13.8435	13.9145	13.9095	13.555	13.9157	13.7759	13.7669	13.7982	13.7123	13.6756	13.9735	13.8409	14.8989	13.8338	13.8324	13.8643	Peptidase_M16;Peptidase_M16_C	+	5.81231	0.00156863	Q9CXT8	Q9CXT8	MPPB_MOUSE	Pmpcb	Mitochondrial-processing peptidase subunit beta	3fb_3da;3fb_3ea;3fb_3ga;3fb_3fa;3fb_3ca;3fb_ctrl;3fb_3eb;3fb_3aa;3fb_3ia;3fb_3ha;3fb_3cb;3fb_3ab;3fb_3ba;3fb_3bb;3fb_3db;3fb_3gb	protein processing [GO:0016485];protein processing involved in protein targeting to mitochondrion [GO:0006627]	mitochondrial inner membrane [GO:0005743];mitochondrial processing peptidase complex [GO:0017087];mitochondrion [GO:0005739]	endopeptidase activity [GO:0004175];metal ion binding [GO:0046872];metalloendopeptidase activity [GO:0004222];metallopeptidase activity [GO:0008237]	mitochondrial inner membrane [GO:0005743];mitochondrial processing peptidase complex [GO:0017087];mitochondrion [GO:0005739];endopeptidase activity [GO:0004175];metal ion binding [GO:0046872];metalloendopeptidase activity [GO:0004222];metallopeptidase activity [GO:0008237];protein processing [GO:0016485];protein processing involved in protein targeting to mitochondrion [GO:0006627]	GO:0004175;GO:0004222;GO:0005739;GO:0005743;GO:0006627;GO:0008237;GO:0016485;GO:0017087;GO:0046872	3.4.24.64
13.7576	13.4111	13.5376	13.5223	13.5399	13.4624	13.4324	13.4131	13.2863	13.1418	13.7579	13.5392	13.4649	13.2818	13.7911	13.8811	13.2923	Steroid_dh	+	5.42105	0.00222222	Q9CY27	Q9CY27	TECR_MOUSE	Tecr	Very-long-chain enoyl-CoA reductase	3aa_3eb;3ga_3eb;3ha_3eb;3ia_3eb;3ha_3ea;3ia_3ea;3ha_ctrl;3ia_ctrl;3ia_3ab;3ia_3fb;3ia_3db;3ia_3cb;3ia_3ca	fatty acid elongation [GO:0030497];sphingolipid metabolic process [GO:0006665];steroid biosynthetic process [GO:0006694];very long-chain fatty acid biosynthetic process [GO:0042761]	endoplasmic reticulum [GO:0005783];endoplasmic reticulum membrane [GO:0005789]	oxidoreductase activity [GO:0016491];very-long-chain enoyl-CoA reductase activity [GO:0102758]	endoplasmic reticulum [GO:0005783];endoplasmic reticulum membrane [GO:0005789];oxidoreductase activity [GO:0016491];very-long-chain enoyl-CoA reductase activity [GO:0102758];fatty acid elongation [GO:0030497];sphingolipid metabolic process [GO:0006665];steroid biosynthetic process [GO:0006694];very long-chain fatty acid biosynthetic process [GO:0042761]	GO:0005783;GO:0005789;GO:0006665;GO:0006694;GO:0016491;GO:0030497;GO:0042761;GO:0102758	1.3.1.93
14.7241	13.0196	13.3265	13.2638	13.2367	13.2207	13.1889	13.0246	13.0106	12.9925	13.42	13.1232	12.8335	12.9428	13.3379	13.6347	13.1542	Sdh_cyt	+	7.09652	0.000121212	Q9CZB0	Q9CZB0	C560_MOUSE	Sdhc	Succinate dehydrogenase cytochrome b560 subunit, mitochondrial	3ia_3ea;3aa_3ea;3aa_3fa;3aa_3gb;3aa_3fb;3aa_3db;3aa_3ab;3aa_3cb;3aa_3eb;3aa_ctrl;3aa_3ca;3aa_3ha;3aa_3da;3aa_3bb;3aa_3ba;3aa_3ga;3aa_3ia	mitochondrial electron transport, succinate to ubiquinone [GO:0006121];proton motive force-driven mitochondrial ATP synthesis [GO:0042776];tricarboxylic acid cycle [GO:0006099]	mitochondrial inner membrane [GO:0005743];mitochondrial respiratory chain complex II, succinate dehydrogenase complex (ubiquinone) [GO:0005749];mitochondrion [GO:0005739];succinate dehydrogenase complex (ubiquinone) [GO:0045257]	electron transfer activity [GO:0009055];heme binding [GO:0020037];metal ion binding [GO:0046872];succinate dehydrogenase activity [GO:0000104]	mitochondrial inner membrane [GO:0005743];mitochondrial respiratory chain complex II, succinate dehydrogenase complex (ubiquinone) [GO:0005749];mitochondrion [GO:0005739];succinate dehydrogenase complex (ubiquinone) [GO:0045257];electron transfer activity [GO:0009055];heme binding [GO:0020037];metal ion binding [GO:0046872];succinate dehydrogenase activity [GO:0000104];mitochondrial electron tran…	GO:0000104;GO:0005739;GO:0005743;GO:0005749;GO:0006099;GO:0006121;GO:0009055;GO:0020037;GO:0042776;GO:0045257;GO:0046872
12.7757	13.4025	12.9487	13.5369	12.8459	12.8111	12.8115	12.7079	13.0202	12.9679	12.8438	14.7714	12.9639	14.3549	12.9124	12.8142	12.8569	Pterin_4a	+	12.5214	0	Q9CZL5	Q9CZL5	PHS2_MOUSE	Pcbd2	Pterin-4-alpha-carbinolamine dehydratase 2	3fb_3ia;3gb_3ia;3fb_3cb;3gb_3cb;3fb_3eb;3gb_3eb;3fb_3db;3gb_3db;3fb_ctrl;3gb_ctrl;3fb_3ca;3gb_3ca;3fb_3da;3gb_3da;3fb_3ha;3gb_3ha;3fb_3aa;3gb_3aa;3fb_3ba;3gb_3ba;3fb_3ga;3gb_3ga;3fb_3fa;3gb_3fa;3fb_3ea;3gb_3ea;3gb_3ab;3gb_3bb	positive regulation of DNA-templated transcription [GO:0045893];tetrahydrobiopterin biosynthetic process [GO:0006729]	mitochondrion [GO:0005739];nucleus [GO:0005634]	4-alpha-hydroxytetrahydrobiopterin dehydratase activity [GO:0008124];identical protein binding [GO:0042802];phenylalanine 4-monooxygenase activity [GO:0004505]	mitochondrion [GO:0005739];nucleus [GO:0005634];4-alpha-hydroxytetrahydrobiopterin dehydratase activity [GO:0008124];identical protein binding [GO:0042802];phenylalanine 4-monooxygenase activity [GO:0004505];positive regulation of DNA-templated transcription [GO:0045893];tetrahydrobiopterin biosynthetic process [GO:0006729]	GO:0004505;GO:0005634;GO:0005739;GO:0006729;GO:0008124;GO:0042802;GO:0045893	4.2.1.96
14.4233	14.4918	14.2945	15.3154	14.4064	14.2676	14.2795	14.3692	14.4326	14.3777	14.1929	14.3684	14.3318	14.4612	14.2175	14.1695	14.3492	Transket_pyr;Transketolase_C	+	3.8632	0.0183797	Q9D051	Q9D051	ODPB_MOUSE	Pdhb	Pyruvate dehydrogenase E1 component subunit beta, mitochondrial	3bb_3ha;3bb_3fa;3bb_3ca;3bb_3ia;3bb_3ga;3bb_3db;3bb_3aa;3bb_3ea;3bb_3ba;3bb_ctrl;3bb_3da;3bb_3cb;3bb_3eb;3bb_3gb;3bb_3fb	acetyl-CoA biosynthetic process from pyruvate [GO:0006086];glucose metabolic process [GO:0006006];tricarboxylic acid cycle [GO:0006099]	acetyltransferase complex [GO:1902493];catalytic complex [GO:1902494];dihydrolipoyl dehydrogenase complex [GO:0045240];mitochondrial pyruvate dehydrogenase complex [GO:0005967];mitochondrion [GO:0005739];nucleoplasm [GO:0005654];pyruvate dehydrogenase complex [GO:0045254]	pyruvate dehydrogenase (acetyl-transferring) activity [GO:0004739];pyruvate dehydrogenase (NAD+) activity [GO:0034604]	acetyltransferase complex [GO:1902493];catalytic complex [GO:1902494];dihydrolipoyl dehydrogenase complex [GO:0045240];mitochondrial pyruvate dehydrogenase complex [GO:0005967];mitochondrion [GO:0005739];nucleoplasm [GO:0005654];pyruvate dehydrogenase complex [GO:0045254];pyruvate dehydrogenase (acetyl-transferring) activity [GO:0004739];pyruvate dehydrogenase (NAD+) activity [GO:0034604];acetyl-…	GO:0004739;GO:0005654;GO:0005739;GO:0005967;GO:0006006;GO:0006086;GO:0006099;GO:0034604;GO:0045240;GO:0045254;GO:1902493;GO:1902494	1.2.4.1
12.9892	12.4229	12.281	12.0117	12.0375	12.0407	11.7894	12.0291	12.1637	11.925	12.3161	12.1614	12.2064	12.1087	12.7627	12.2591	12.0345	Thioredoxin	+	6.17139	0.00102128	Q9D710	Q9D710	TMX2_MOUSE	Tmx2	Thioredoxin-related transmembrane protein 2	3ha_3ca;3aa_3ca;3ha_3db;3aa_3db;3ha_3eb;3aa_3eb;3ha_ctrl;3aa_ctrl;3ha_3bb;3aa_3bb;3ha_3da;3aa_3da;3ha_3fb;3aa_3fb;3ha_3gb;3aa_3gb;3ha_3cb;3aa_3cb;3aa_3fa;3aa_3ia;3aa_3ga;3aa_3ba	brain development [GO:0007420]	endoplasmic reticulum membrane [GO:0005789];membrane-bounded organelle [GO:0043227];mitochondria-associated endoplasmic reticulum membrane [GO:0044233];mitochondrial membrane [GO:0031966];mitochondrion [GO:0005739]	disulfide oxidoreductase activity [GO:0015036];identical protein binding [GO:0042802]	endoplasmic reticulum membrane [GO:0005789];membrane-bounded organelle [GO:0043227];mitochondria-associated endoplasmic reticulum membrane [GO:0044233];mitochondrial membrane [GO:0031966];mitochondrion [GO:0005739];disulfide oxidoreductase activity [GO:0015036];identical protein binding [GO:0042802];brain development [GO:0007420]	GO:0005739;GO:0005789;GO:0007420;GO:0015036;GO:0031966;GO:0042802;GO:0043227;GO:0044233
12.9728	12.7324	12.756	12.694	12.5673	12.6615	12.404	12.5316	12.5633	12.6472	12.8691	12.7843	13.2376	12.5358	15.3471	13.0564	12.7058	Str_synth	+	21.0538	0	Q9D7N9	Q9D7N9	APMAP_MOUSE	Apmap	Adipocyte plasma membrane-associated protein	3fa_3ca;3ha_3ca;3ha_3da;3ha_3ea;3ha_3cb;3ha_3eb;3ha_3db;3ha_3ab;3ha_ctrl;3ha_3fb;3ha_3ba;3ha_3bb;3ha_3gb;3ha_3ga;3ha_3aa;3ha_3ia;3ha_3fa	biosynthetic process [GO:0009058]	cell surface [GO:0009986];membrane [GO:0016020]	arylesterase activity [GO:0004064];strictosidine synthase activity [GO:0016844]	cell surface [GO:0009986];membrane [GO:0016020];arylesterase activity [GO:0004064];strictosidine synthase activity [GO:0016844];biosynthetic process [GO:0009058]	GO:0004064;GO:0009058;GO:0009986;GO:0016020;GO:0016844
16.4605	15.8797	16.1536	16.4874	16.6672	16.4779	16.4246	16.4392	15.1839	14.7747	16.3366	16.6346	16.0505	16.6714	15.9258	15.6695	14.6676	p450	+	7.37355	0	Q9DBG1	Q9DBG1	CP27A_MOUSE	Cyp27a1	Sterol 26-hydroxylase, mitochondrial	3ab_ctrl;3ba_ctrl;3cb_ctrl;3fa_ctrl;3db_ctrl;3ca_ctrl;3ga_ctrl;3bb_ctrl;3aa_ctrl;3gb_ctrl;3da_ctrl;3fb_ctrl;3ab_3eb;3ba_3eb;3cb_3eb;3fa_3eb;3db_3eb;3ca_3eb;3ga_3eb;3bb_3eb;3aa_3eb;3gb_3eb;3da_3eb;3fb_3eb;3gb_3ea;3da_3ea;3fb_3ea	bile acid biosynthetic process [GO:0006699];C21-steroid hormone biosynthetic process [GO:0006700];calcitriol biosynthetic process from calciol [GO:0036378];cholesterol catabolic process [GO:0006707];cholesterol metabolic process [GO:0008203]	mitochondrial envelope [GO:0005740];mitochondrial inner membrane [GO:0005743];mitochondrion [GO:0005739]	3-alpha,7-alpha,12-alpha-trihydroxycholestan-26-al 26-oxidoreductase activity [GO:0047103];cholestanetetraol 26-dehydrogenase activity [GO:0047748];cholestanetriol 26-monooxygenase activity [GO:0047749];cholesterol 26-hydroxylase activity [GO:0031073];cholesterol 7-alpha-monooxygenase activity [GO:0008123];cholesterol monooxygenase (side-chain-cleaving) activity [GO:0008386];heme binding [GO:0020…	mitochondrial envelope [GO:0005740];mitochondrial inner membrane [GO:0005743];mitochondrion [GO:0005739];3-alpha,7-alpha,12-alpha-trihydroxycholestan-26-al 26-oxidoreductase activity [GO:0047103];cholestanetetraol 26-dehydrogenase activity [GO:0047748];cholestanetriol 26-monooxygenase activity [GO:0047749];cholesterol 26-hydroxylase activity [GO:0031073];cholesterol 7-alpha-monooxygenase activity…	GO:0005506;GO:0005739;GO:0005740;GO:0005743;GO:0006699;GO:0006700;GO:0006707;GO:0008123;GO:0008203;GO:0008386;GO:0020037;GO:0030343;GO:0030544;GO:0031073;GO:0036378;GO:0047103;GO:0047748;GO:0047749	1.14.15.15
14.1449	13.8041	14.1097	14.0427	14.762	14.1807	14.0703	14.1318	13.8969	14.0881	14.2143	14.1252	13.8321	14.0259	14.0204	14.1276	14.1808	Oxidored_q6	+	3.74623	0.021253	Q9DC70	Q9DC70	NDUS7_MOUSE	Ndufs7	NADH dehydrogenase [ubiquinone] iron-sulfur protein 7, mitochondrial	3da_3ea;3da_3fa;3da_3ha;3da_3ab;3da_3bb;3da_3eb;3da_3fb;3da_3ca;3da_3gb;3da_3ga;3da_3ba;3da_ctrl;3da_3db;3da_3cb	aerobic respiration [GO:0009060];electron transport coupled proton transport [GO:0015990];mitochondrial electron transport, NADH to ubiquinone [GO:0006120];mitochondrial respiratory chain complex I assembly [GO:0032981];proton motive force-driven mitochondrial ATP synthesis [GO:0042776]	mitochondrial inner membrane [GO:0005743];mitochondrial respiratory chain complex I [GO:0005747];mitochondrion [GO:0005739];neuron projection [GO:0043005];neuronal cell body [GO:0043025];synaptic membrane [GO:0097060]	4 iron, 4 sulfur cluster binding [GO:0051539];metal ion binding [GO:0046872];NADH dehydrogenase (ubiquinone) activity [GO:0008137];NADH dehydrogenase activity [GO:0003954];protease binding [GO:0002020];quinone binding [GO:0048038]	mitochondrial inner membrane [GO:0005743];mitochondrial respiratory chain complex I [GO:0005747];mitochondrion [GO:0005739];neuron projection [GO:0043005];neuronal cell body [GO:0043025];synaptic membrane [GO:0097060];4 iron, 4 sulfur cluster binding [GO:0051539];metal ion binding [GO:0046872];NADH dehydrogenase (ubiquinone) activity [GO:0008137];NADH dehydrogenase activity [GO:0003954];protease …	GO:0002020;GO:0003954;GO:0005739;GO:0005743;GO:0005747;GO:0006120;GO:0008137;GO:0009060;GO:0015990;GO:0032981;GO:0042776;GO:0043005;GO:0043025;GO:0046872;GO:0048038;GO:0051539;GO:0097060	7.1.1.2
11.809	11.0858	11.0226	12.2322	11.4565	12.0923	11.0107	11.8876	10.813	9.0639	11.783	12.3213	11.804	12.1278	10.063	9.85124	9.74459	Fe-S_biosyn	+	3.68185	0.0229767	Q9DCB8	Q9DCB8	ISCA2_MOUSE	Isca2	Iron-sulfur cluster assembly 2 homolog, mitochondrial	3fb_3eb;3gb_3eb;3fb_ctrl;3gb_ctrl;3gb_3ia	iron-sulfur cluster assembly [GO:0016226];protein maturation by [4Fe-4S] cluster transfer [GO:0106035]	mitochondrion [GO:0005739]	2 iron, 2 sulfur cluster binding [GO:0051537];4 iron, 4 sulfur cluster binding [GO:0051539];identical protein binding [GO:0042802];iron ion binding [GO:0005506]	mitochondrion [GO:0005739];2 iron, 2 sulfur cluster binding [GO:0051537];4 iron, 4 sulfur cluster binding [GO:0051539];identical protein binding [GO:0042802];iron ion binding [GO:0005506];iron-sulfur cluster assembly [GO:0016226];protein maturation by [4Fe-4S] cluster transfer [GO:0106035]	GO:0005506;GO:0005739;GO:0016226;GO:0042802;GO:0051537;GO:0051539;GO:0106035
13.0104	12.7216	13.6452	13.2404	11.833	11.7801	11.7858	12.1401	12.0277	12.0036	11.8483	12.0696	11.8818	12.1535	12.6813	12.0169	12.0852	START	+	17.5783	0	Q9EPQ7	Q9EPQ7	STAR5_MOUSE	Stard5	StAR-related lipid transfer protein 5	3ha_3db;3ab_3db;3aa_3db;3bb_3db;3ba_3db;3ha_3ga;3ab_3ga;3aa_3ga;3bb_3ga;3ba_3ga;3ha_3ca;3ab_3ca;3aa_3ca;3bb_3ca;3ba_3ca;3ha_3da;3ab_3da;3aa_3da;3bb_3da;3ba_3da;3ab_3ia;3aa_3ia;3bb_3ia;3ba_3ia;3aa_3ea;3bb_3ea;3ba_3ea;3aa_3fa;3bb_3fa;3ba_3fa;3aa_3eb;3bb_3eb;3ba_3eb;3aa_3cb;3bb_3cb;3ba_3cb;3aa_3gb;3bb_3gb;3ba_3gb;3aa_ctrl;3bb_ctrl;3ba_ctrl;3aa_3fb;3bb_3fb;3ba_3fb;3ba_3ha;3ba_3ab	cholesterol import [GO:0070508]		cholesterol binding [GO:0015485];cholesterol transfer activity [GO:0120020]	cholesterol binding [GO:0015485];cholesterol transfer activity [GO:0120020];cholesterol import [GO:0070508]	GO:0015485;GO:0070508;GO:0120020
12.6404	12.4899	12.5617	12.4856	12.5486	12.4034	12.5143	12.6739	12.3139	12.5975	12.5927	12.6166	12.5966	12.4233	12.4927	13.3945	12.6524	EMP70	+	4.20686	0.0109859	Q9ET30	Q9ET30	TM9S3_MOUSE	Tm9sf3	Transmembrane 9 superfamily member 3	3ia_3ea;3ia_3eb;3ia_3ca;3ia_3fb;3ia_3ab;3ia_3ha;3ia_3bb;3ia_3db;3ia_3ga;3ia_3ba;3ia_3da;3ia_3gb;3ia_3fa;3ia_ctrl;3ia_3cb;3ia_3aa	protein localization to membrane [GO:0072657]	membrane [GO:0016020]		membrane [GO:0016020];protein localization to membrane [GO:0072657]	GO:0016020;GO:0072657
16.7036	17.3237	16.6599	17.6707	16.1545	16.1802	16.1277	16.1697	16.0498	16.1968	16.1705	16.2414	16.1656	16.3485	16.3306	16.1821	16.0211	Flavodoxin_2	+	11.2624	0	Q9JI75	NQO2_HUMAN;Q9JI75	NQO2_MOUSE	Nqo2	Ribosyldihydronicotinamide dehydrogenase [quinone]	3ab_3ea;3bb_3ea;3ab_3fa;3bb_3fa;3ab_ctrl;3bb_ctrl;3ab_3ca;3bb_3ca;3ab_3cb;3bb_3cb;3ab_3eb;3bb_3eb;3ab_3da;3bb_3da;3ab_3ga;3bb_3ga;3ab_3ia;3bb_3ia;3ab_3db;3bb_3db;3ab_3ha;3bb_3ha;3ab_3gb;3bb_3gb;3ab_3fb;3bb_3fb;3bb_3ba;3bb_3aa	positive regulation of ERK1 and ERK2 cascade [GO:0070374];positive regulation of neuron apoptotic process [GO:0043525];positive regulation of reactive oxygen species metabolic process [GO:2000379];positive regulation of vascular associated smooth muscle cell proliferation [GO:1904707];quinone catabolic process [GO:1901662]	cytosol [GO:0005829];nucleoplasm [GO:0005654]	chloride ion binding [GO:0031404];dihydronicotinamide riboside quinone reductase activity [GO:0001512];electron transfer activity [GO:0009055];FAD binding [GO:0071949];melatonin binding [GO:1904408];NAD(P)H dehydrogenase (quinone) activity [GO:0003955];oxidoreductase activity [GO:0016491];oxidoreductase activity, acting on other nitrogenous compounds as donors [GO:0016661];protein homodimerizatio…	cytosol [GO:0005829];nucleoplasm [GO:0005654];chloride ion binding [GO:0031404];dihydronicotinamide riboside quinone reductase activity [GO:0001512];electron transfer activity [GO:0009055];FAD binding [GO:0071949];melatonin binding [GO:1904408];NAD(P)H dehydrogenase (quinone) activity [GO:0003955];oxidoreductase activity [GO:0016491];oxidoreductase activity, acting on other nitrogenous compounds …	GO:0001512;GO:0003955;GO:0005654;GO:0005829;GO:0008270;GO:0009055;GO:0016491;GO:0016661;GO:0031404;GO:0042803;GO:0043525;GO:0070374;GO:0071949;GO:1901662;GO:1904408;GO:1904707;GO:1905594;GO:2000379	1.10.5.1
13.7275	13.4587	13.3088	13.3974	14.1181	13.4084	14.0623	13.9264	12.9024	12.4455	13.5102	13.0741	13.7242	13.8005	13.6065	12.8744	12.6574	p450	+	4.74	0.0055625	Q9JKJ9	Q9JKJ9	CP39A_MOUSE	Cyp39a1	24-hydroxycholesterol 7-alpha-hydroxylase	3cb_3eb;3fb_3eb;3da_3eb;3ca_3eb;3cb_ctrl;3da_ctrl;3ca_ctrl;3da_3ea;3ca_3ea	bile acid biosynthetic process [GO:0006699];bile acid catabolic process [GO:0030573];cholesterol catabolic process [GO:0006707];cholesterol homeostasis [GO:0042632];digestion [GO:0007586]	endoplasmic reticulum membrane [GO:0005789];intracellular membrane-bounded organelle [GO:0043231]	24-hydroxycholesterol 7alpha-hydroxylase activity [GO:0033782];heme binding [GO:0020037];iron ion binding [GO:0005506];oxysterol 7-alpha-hydroxylase activity [GO:0008396];steroid 7-alpha-hydroxylase activity [GO:0008387]	endoplasmic reticulum membrane [GO:0005789];intracellular membrane-bounded organelle [GO:0043231];24-hydroxycholesterol 7alpha-hydroxylase activity [GO:0033782];heme binding [GO:0020037];iron ion binding [GO:0005506];oxysterol 7-alpha-hydroxylase activity [GO:0008396];steroid 7-alpha-hydroxylase activity [GO:0008387];bile acid biosynthetic process [GO:0006699];bile acid catabolic process [GO:0030…	GO:0005506;GO:0005789;GO:0006699;GO:0006707;GO:0007586;GO:0008387;GO:0008396;GO:0020037;GO:0030573;GO:0033782;GO:0042632;GO:0043231	1.14.14.26
16.863	16.8822	16.8491	16.8595	16.9255	16.8349	16.8285	16.8522	16.889	16.8674	16.7479	16.7996	16.8978	17.6955	17.3968	16.7992	16.8456	Aldedh	+	3.94809	0.0158974	Q9JLJ2	Q9JLJ2	AL9A1_MOUSE	Aldh9a1	4-trimethylaminobutyraldehyde dehydrogenase	3fb_3db;3fb_3ga;3fb_3cb;3fb_3ia;3fb_3fa;3fb_3eb;3fb_ctrl;3fb_3gb;3fb_3bb;3fb_3ba;3fb_3ca;3fb_3aa;3fb_3ab;3fb_3ea;3fb_3da	carnitine biosynthetic process [GO:0045329];carnitine metabolic process [GO:0009437];cellular aldehyde metabolic process [GO:0006081];neurotransmitter biosynthetic process [GO:0042136];protein homotetramerization [GO:0051289]	cytosol [GO:0005829];mitochondrion [GO:0005739]	4-trimethylammoniobutyraldehyde dehydrogenase activity [GO:0047105];aldehyde dehydrogenase (NAD+) activity [GO:0004029];amine binding [GO:0043176];aminobutyraldehyde dehydrogenase activity [GO:0019145];glyceraldehyde-3-phosphate dehydrogenase (NAD+) (non-phosphorylating) activity [GO:0043878];identical protein binding [GO:0042802];NAD binding [GO:0051287];oxidoreductase activity, acting on the al…	cytosol [GO:0005829];mitochondrion [GO:0005739];4-trimethylammoniobutyraldehyde dehydrogenase activity [GO:0047105];aldehyde dehydrogenase (NAD+) activity [GO:0004029];amine binding [GO:0043176];aminobutyraldehyde dehydrogenase activity [GO:0019145];glyceraldehyde-3-phosphate dehydrogenase (NAD+) (non-phosphorylating) activity [GO:0043878];identical protein binding [GO:0042802];NAD binding [GO:00…	GO:0004029;GO:0005739;GO:0005829;GO:0006081;GO:0009437;GO:0016620;GO:0019145;GO:0036094;GO:0042136;GO:0042802;GO:0043176;GO:0043878;GO:0045329;GO:0047105;GO:0051287;GO:0051289	1.2.1.3;1.2.1.47
10.939	10.945	10.9168	11.1961	10.0734	11.0753	10.6388	11.0903	10.2736	10.8404	11.2951	11.9149	10.9626	13.0855	12.7673	12.4163	9.45991	Nfu_N;NifU	+	6.99272	0.000228571	Q9QZ23	Q9QZ23	NFU1_MOUSE	Nfu1	NFU1 iron-sulfur cluster scaffold homolog, mitochondrial	3gb_ctrl;3ia_ctrl;3ha_ctrl;3fb_ctrl;3ia_3da;3ha_3da;3fb_3da;3ia_3ea;3ha_3ea;3fb_3ea;3fb_3ca;3fb_3fa;3fb_3eb;3fb_3ab;3fb_3ba;3fb_3aa	iron-sulfur cluster assembly [GO:0016226]	cytosol [GO:0005829];mitochondrion [GO:0005739];nucleoplasm [GO:0005654];nucleus [GO:0005634]	4 iron, 4 sulfur cluster binding [GO:0051539];iron ion binding [GO:0005506]	cytosol [GO:0005829];mitochondrion [GO:0005739];nucleoplasm [GO:0005654];nucleus [GO:0005634];4 iron, 4 sulfur cluster binding [GO:0051539];iron ion binding [GO:0005506];iron-sulfur cluster assembly [GO:0016226]	GO:0005506;GO:0005634;GO:0005654;GO:0005739;GO:0005829;GO:0016226;GO:0051539
16.2755	14.9226	15.3941	15.1282	14.8792	14.8931	15.073	14.944	14.6308	14.9461	15.1799	14.7953	15.3974	14.8787	14.9635	14.8738	14.8331	Pro_dh	+	8.91076	0	Q9WU79	Q9WU79	PROD_MOUSE	Prodh	Proline dehydrogenase 1, mitochondrial	3fa_3ea;3ba_3ea;3aa_3ea;3aa_3gb;3aa_3da;3aa_ctrl;3aa_3eb;3aa_3ab;3aa_3db;3aa_3ia;3aa_3fb;3aa_3ha;3aa_3cb;3aa_3bb;3aa_3ca;3aa_3ga;3aa_3fa;3aa_3ba	positive regulation of cell death [GO:0010942];proline catabolic process to glutamate [GO:0010133]	intracellular membrane-bounded organelle [GO:0043231];mitochondrial inner membrane [GO:0005743];mitochondrial matrix [GO:0005759];mitochondrion [GO:0005739];nucleoplasm [GO:0005654]	amino acid binding [GO:0016597];FAD binding [GO:0071949];proline dehydrogenase activity [GO:0004657]	intracellular membrane-bounded organelle [GO:0043231];mitochondrial inner membrane [GO:0005743];mitochondrial matrix [GO:0005759];mitochondrion [GO:0005739];nucleoplasm [GO:0005654];amino acid binding [GO:0016597];FAD binding [GO:0071949];proline dehydrogenase activity [GO:0004657];positive regulation of cell death [GO:0010942];proline catabolic process to glutamate [GO:0010133]	GO:0004657;GO:0005654;GO:0005739;GO:0005743;GO:0005759;GO:0010133;GO:0010942;GO:0016597;GO:0043231;GO:0071949	1.5.5.2
15.412	16.5233	14.9643	15.7598	14.2362	14.5276	14.3807	14.3727	14.2758	14.3353	14.5057	15.4707	14.3359	15.6144	14.4079	14.3821	14.2488	Aminotran_5	+	16.8726	0	Q9Z1J3	Q9Z1J3	NFS1_MOUSE	Nfs1	Cysteine desulfurase	3aa_3da;3gb_3da;3fb_3da;3bb_3da;3ab_3da;3aa_3fa;3gb_3fa;3fb_3fa;3bb_3fa;3ab_3fa;3aa_ctrl;3gb_ctrl;3fb_ctrl;3bb_ctrl;3ab_ctrl;3aa_3eb;3gb_3eb;3fb_3eb;3bb_3eb;3ab_3eb;3aa_3ea;3gb_3ea;3fb_3ea;3bb_3ea;3ab_3ea;3aa_3ca;3gb_3ca;3fb_3ca;3bb_3ca;3ab_3ca;3aa_3ha;3gb_3ha;3fb_3ha;3bb_3ha;3ab_3ha;3aa_3ga;3gb_3ga;3fb_3ga;3bb_3ga;3ab_3ga;3aa_3cb;3gb_3cb;3fb_3cb;3bb_3cb;3ab_3cb;3gb_3ia;3fb_3ia;3bb_3ia;3ab_3ia;3f…	[2Fe-2S] cluster assembly [GO:0044571];[4Fe-4S] cluster assembly [GO:0044572];iron incorporation into metallo-sulfur cluster [GO:0018283];iron-sulfur cluster assembly [GO:0016226];Mo-molybdopterin cofactor biosynthetic process [GO:0006777];molybdopterin cofactor metabolic process [GO:0043545]	cytosol [GO:0005829];iron-sulfur cluster assembly complex [GO:1990229];mitochondrial iron-sulfur cluster assembly complex [GO:0099128];mitochondrial matrix [GO:0005759];mitochondrion [GO:0005739];nucleoplasm [GO:0005654];nucleus [GO:0005634]	cysteine desulfurase activity [GO:0031071];iron-sulfur cluster binding [GO:0051536];metal ion binding [GO:0046872];protein homodimerization activity [GO:0042803];pyridoxal phosphate binding [GO:0030170]	cytosol [GO:0005829];iron-sulfur cluster assembly complex [GO:1990229];mitochondrial iron-sulfur cluster assembly complex [GO:0099128];mitochondrial matrix [GO:0005759];mitochondrion [GO:0005739];nucleoplasm [GO:0005654];nucleus [GO:0005634];cysteine desulfurase activity [GO:0031071];iron-sulfur cluster binding [GO:0051536];metal ion binding [GO:0046872];protein homodimerization activity [GO:0042…	GO:0005634;GO:0005654;GO:0005739;GO:0005759;GO:0005829;GO:0006777;GO:0016226;GO:0018283;GO:0030170;GO:0031071;GO:0042803;GO:0043545;GO:0044571;GO:0044572;GO:0046872;GO:0051536;GO:0099128;GO:1990229	2.8.1.7
16.8481	16.8144	15.7538	16.3143	14.7318	14.3573	14.5586	14.5682	14.4004	14.5907	15.0374	14.7633	14.5444	14.694	15.092	14.9963	14.6064	Mito_carr	+	19.4325	0	Q9Z2Z6	Q9Z2Z6	MCAT_MOUSE	Slc25a20	Mitochondrial carnitine/acylcarnitine carrier protein	3ba_3fa;3bb_3fa;3aa_3fa;3ab_3fa;3ba_3ea;3bb_3ea;3aa_3ea;3ab_3ea;3ba_3db;3bb_3db;3aa_3db;3ab_3db;3ba_ctrl;3bb_ctrl;3aa_ctrl;3ab_ctrl;3ba_3ca;3bb_3ca;3aa_3ca;3ab_3ca;3ba_3cb;3bb_3cb;3aa_3cb;3ab_3cb;3ba_3da;3bb_3da;3aa_3da;3ab_3da;3ba_3gb;3bb_3gb;3aa_3gb;3ab_3gb;3bb_3eb;3aa_3eb;3ab_3eb;3bb_3fb;3aa_3fb;3ab_3fb;3bb_3ga;3aa_3ga;3ab_3ga;3bb_3ha;3aa_3ha;3ab_3ha;3bb_3ia;3aa_3ia;3ab_3ia;3aa_3ba;3ab_3ba	carnitine transmembrane transport [GO:1902603];in utero embryonic development [GO:0001701];lipid transport [GO:0006869];mitochondrial transport [GO:0006839]	cytosol [GO:0005829];mitochondrial envelope [GO:0005740];mitochondrial inner membrane [GO:0005743];mitochondrion [GO:0005739]	acyl carnitine transmembrane transporter activity [GO:0015227]	cytosol [GO:0005829];mitochondrial envelope [GO:0005740];mitochondrial inner membrane [GO:0005743];mitochondrion [GO:0005739];acyl carnitine transmembrane transporter activity [GO:0015227];carnitine transmembrane transport [GO:1902603];in utero embryonic development [GO:0001701];lipid transport [GO:0006869];mitochondrial transport [GO:0006839]	GO:0001701;GO:0005739;GO:0005740;GO:0005743;GO:0005829;GO:0006839;GO:0006869;GO:0015227;GO:1902603

## Sheet: Normalizedvalues
3aa	3ab	3ba	3bb	3da	3db	3ca	3cb	3ea	3eb	3ga	3gb	3fa	3fb	3ha	3ia	ctrl	C: Pfam	C: ANOVA Significant	N: -Log ANOVA p value	N: ANOVA q-value	T: Protein.Group	T: Protein.Ids	T: Protein.Names	T: Genes	T: First.Protein.Description	T: Significant pairs	T: Gene Ontology (biological process)	T: Gene Ontology (cellular component)	T: Gene Ontology (molecular function)	T: Gene Ontology (GO)	T: Gene Ontology IDs	T: EC number
-0.0139141	0.496908	-0.0424843	0.185778	0.0156431	0.019804	-0.140784	-0.199646	-0.219812	-0.143434	-0.162018	0.0231342	-0.262123	-0.0663176	-0.253441	0.0172682	0	Peptidase_M3	+	8.13998	0	A6H611	A6H611	MIPEP_MOUSE	Mipep	Mitochondrial intermediate peptidase	3bb_3fa;3ab_3fa;3bb_3ha;3ab_3ha;3ab_3ea;3ab_3ga;3ab_3cb;3ab_3eb;3ab_3ca;3ab_3da;3ab_3ba;3ab_3aa;3ab_ctrl;3ab_3ia;3ab_3db;3ab_3gb;3ab_3fb	peptide metabolic process [GO:0006518];protein processing involved in protein targeting to mitochondrion [GO:0006627]	mitochondrial matrix [GO:0005759];mitochondrion [GO:0005739]	endopeptidase activity [GO:0004175];metal ion binding [GO:0046872];metalloendopeptidase activity [GO:0004222]	mitochondrial matrix [GO:0005759];mitochondrion [GO:0005739];endopeptidase activity [GO:0004175];metal ion binding [GO:0046872];metalloendopeptidase activity [GO:0004222];peptide metabolic process [GO:0006518];protein processing involved in protein targeting to mitochondrion [GO:0006627]	GO:0004175;GO:0004222;GO:0005739;GO:0005759;GO:0006518;GO:0006627;GO:0046872	3.4.24.59
1.0972	-0.138203	0.939779	-0.133602	1.41154	0.255729	1.22486	0.302175	0.256934	0.352967	1.01508	0.300025	0.794521	0.526991	1.00359	0.948613	0	zf-CDGSH	+	3.5462	0.0290337	B1AR13	B1AR13	CISD3_MOUSE	Cisd3	CDGSH iron-sulfur domain-containing protein 3, mitochondrial		protein maturation by [2Fe-2S] cluster transfer [GO:0106034]	mitochondrion [GO:0005739]	2 iron, 2 sulfur cluster binding [GO:0051537];metal ion binding [GO:0046872]	mitochondrion [GO:0005739];2 iron, 2 sulfur cluster binding [GO:0051537];metal ion binding [GO:0046872];protein maturation by [2Fe-2S] cluster transfer [GO:0106034]	GO:0005739;GO:0046872;GO:0051537;GO:0106034
0.334404	-0.0899887	0.136903	0.00196743	0.0176191	-0.10527	-0.167509	-0.0455618	-0.100357	-0.0938568	0.290886	-0.0344362	0.0771093	-0.134787	0.3289	0.391081	0	ApoB100_C;DUF1081;DUF1943;Vitellogenin_N	+	4.47758	0.00806061	E9Q414	E9Q414	APOB_MOUSE	Apob	Apolipoprotein B-100	3ia_3ea;3ia_3ab;3ia_3ca;3ia_3db;3ia_3fb;3ia_3gb;3ia_3fa	artery morphogenesis [GO:0048844];cellular response to prostaglandin stimulus [GO:0071379];cellular response to tumor necrosis factor [GO:0071356];cholesterol efflux [GO:0033344];cholesterol homeostasis [GO:0042632];cholesterol metabolic process [GO:0008203];cholesterol transport [GO:0030301];establishment of localization in cell [GO:0051649];fertilization [GO:0009566];flagellated sperm motility …	chylomicron [GO:0042627];cytoplasm [GO:0005737];cytosol [GO:0005829];endoplasmic reticulum [GO:0005783];endoplasmic reticulum exit site [GO:0070971];extracellular region [GO:0005576];extracellular space [GO:0005615];high-density lipoprotein particle [GO:0034364];intermediate-density lipoprotein particle [GO:0034363];intracellular membrane-bounded organelle [GO:0043231];lipid droplet [GO:0005811];…	cholesterol transfer activity [GO:0120020];heparin binding [GO:0008201];lipase binding [GO:0035473];low-density lipoprotein particle receptor binding [GO:0050750];phospholipid binding [GO:0005543]	chylomicron [GO:0042627];cytoplasm [GO:0005737];cytosol [GO:0005829];endoplasmic reticulum [GO:0005783];endoplasmic reticulum exit site [GO:0070971];extracellular region [GO:0005576];extracellular space [GO:0005615];high-density lipoprotein particle [GO:0034364];intermediate-density lipoprotein particle [GO:0034363];intracellular membrane-bounded organelle [GO:0043231];lipid droplet [GO:0005811];…	GO:0001701;GO:0005543;GO:0005576;GO:0005615;GO:0005737;GO:0005783;GO:0005811;GO:0005829;GO:0006629;GO:0006642;GO:0007283;GO:0007399;GO:0008201;GO:0008203;GO:0009566;GO:0009615;GO:0009743;GO:0009791;GO:0010269;GO:0010628;GO:0010744;GO:0010884;GO:0010886;GO:0012506;GO:0016042;GO:0019433;GO:0030301;GO:0030317;GO:0031983;GO:0032355;GO:0032496;GO:0033344;GO:0034359;GO:0034361;GO:0034362;GO:0034363;GO:…
0.245758	0.318237	0.417097	1.84887	0.169998	-0.03088	-0.0184174	0.0238609	0.155384	-0.100086	0.101707	0.0760746	0.00884247	0.668156	0.00892639	-0.132221	0	Pyr_redox;Pyr_redox_2;Pyr_redox_dim	+	6.86657	0.000210526	O08749	O08749	DLDH_MOUSE	Dld	Dihydrolipoyl dehydrogenase, mitochondrial	3bb_3ia;3bb_3eb;3bb_ctrl;3bb_3db;3bb_3fa;3bb_3ha;3bb_3gb;3bb_3ca;3bb_3cb;3bb_3ga;3bb_3da;3bb_3ea;3bb_3ab;3bb_3aa;3bb_3ba;3bb_3fb	2-oxoglutarate metabolic process [GO:0006103];acetyl-CoA biosynthetic process from pyruvate [GO:0006086];branched-chain amino acid catabolic process [GO:0009083];dihydrolipoamide metabolic process [GO:0051068];gastrulation [GO:0007369];histone succinylation [GO:0106077];lipoate metabolic process [GO:0009106];mitochondrial electron transport, NADH to ubiquinone [GO:0006120];proteolysis [GO:0006508…	acetyltransferase complex [GO:1902493];acrosomal matrix [GO:0043159];cilium [GO:0005929];dihydrolipoyl dehydrogenase complex [GO:0045240];mitochondrial alpha-ketoglutarate dehydrogenase complex [GO:0005947];mitochondrial matrix [GO:0005759];mitochondrial pyruvate dehydrogenase complex [GO:0005967];mitochondrion [GO:0005739];motile cilium [GO:0031514];myelin sheath [GO:0043209];nucleus [GO:0005634…	dihydrolipoyl dehydrogenase activity [GO:0004148];flavin adenine dinucleotide binding [GO:0050660];lipoamide binding [GO:0043544];NAD binding [GO:0051287];pyruvate dehydrogenase (NAD+) activity [GO:0034604]	acetyltransferase complex [GO:1902493];acrosomal matrix [GO:0043159];cilium [GO:0005929];dihydrolipoyl dehydrogenase complex [GO:0045240];mitochondrial alpha-ketoglutarate dehydrogenase complex [GO:0005947];mitochondrial matrix [GO:0005759];mitochondrial pyruvate dehydrogenase complex [GO:0005967];mitochondrion [GO:0005739];motile cilium [GO:0031514];myelin sheath [GO:0043209];nucleus [GO:0005634…	GO:0004148;GO:0005634;GO:0005739;GO:0005759;GO:0005929;GO:0005947;GO:0005967;GO:0006086;GO:0006103;GO:0006120;GO:0006508;GO:0007369;GO:0009083;GO:0009106;GO:0031514;GO:0034604;GO:0042391;GO:0043159;GO:0043209;GO:0043544;GO:0045240;GO:0045252;GO:0045254;GO:0048240;GO:0050660;GO:0051068;GO:0051287;GO:0106077;GO:1902493	1.8.1.4
1.09858	0.595401	0.953641	0.948138	1.22309	0.898328	1.02489	0.818364	0.282407	0.238706	1.12771	0.865919	0.526065	0.940936	0.692141	0.42152	0	p450	+	7.44297	0	O09158	O09158	CP3AP_MOUSE	Cyp3a25	Cytochrome P450 3A25	3ab_ctrl;3db_ctrl;3cb_ctrl;3gb_ctrl;3ba_ctrl;3aa_ctrl;3fb_ctrl;3bb_ctrl;3ca_ctrl;3ga_ctrl;3da_ctrl;3aa_3eb;3fb_3eb;3bb_3eb;3ca_3eb;3ga_3eb;3da_3eb;3aa_3ea;3fb_3ea;3bb_3ea;3ca_3ea;3ga_3ea;3da_3ea;3da_3ia	oxidative demethylation [GO:0070989];response to bacterium [GO:0009617]	endoplasmic reticulum membrane [GO:0005789]	aromatase activity [GO:0070330];estrogen 16-alpha-hydroxylase activity [GO:0101020];estrogen 2-hydroxylase activity [GO:0101021];heme binding [GO:0020037];iron ion binding [GO:0005506];retinoic acid 4-hydroxylase activity [GO:0008401];steroid hydroxylase activity [GO:0008395];testosterone 16-alpha-hydroxylase activity [GO:0008390];testosterone 6-beta-hydroxylase activity [GO:0050649]	endoplasmic reticulum membrane [GO:0005789];aromatase activity [GO:0070330];estrogen 16-alpha-hydroxylase activity [GO:0101020];estrogen 2-hydroxylase activity [GO:0101021];heme binding [GO:0020037];iron ion binding [GO:0005506];retinoic acid 4-hydroxylase activity [GO:0008401];steroid hydroxylase activity [GO:0008395];testosterone 16-alpha-hydroxylase activity [GO:0008390];testosterone 6-beta-hy…	GO:0005506;GO:0005789;GO:0008390;GO:0008395;GO:0008401;GO:0009617;GO:0020037;GO:0050649;GO:0070330;GO:0070989;GO:0101020;GO:0101021	1.14.14.1
0.468219	-0.0431023	0.206885	0.0984573	0.130377	0.080781	0.119624	0.0505171	-0.128009	-0.0137939	0.320247	0.181191	0.252259	-0.00365734	0.533103	0.395783	0	AMP-binding;AMP-binding_C	+	8.01702	0	O35488	O35488	S27A2_MOUSE	Slc27a2	Long-chain fatty acid transport protein 2	3ga_3ea;3ia_3ea;3aa_3ea;3ha_3ea;3ga_3eb;3ia_3eb;3aa_3eb;3ha_3eb;3ga_3ab;3ia_3ab;3aa_3ab;3ha_3ab;3aa_3fb;3ha_3fb;3aa_3db;3ha_3db;3aa_3cb;3ha_3cb;3aa_ctrl;3ha_ctrl;3ha_3bb;3ha_3da;3ha_3ca;3ha_3ba;3ha_3gb;3ha_3fa	bile acid biosynthetic process [GO:0006699];fatty acid alpha-oxidation [GO:0001561];fatty acid beta-oxidation [GO:0006635];fatty acid transport [GO:0015908];long-chain fatty acid import into cell [GO:0044539];long-chain fatty acid metabolic process [GO:0001676];methyl-branched fatty acid metabolic process [GO:0097089];very long-chain fatty acid catabolic process [GO:0042760];very long-chain fatty…	endoplasmic reticulum [GO:0005783];endoplasmic reticulum lumen [GO:0005788];endoplasmic reticulum membrane [GO:0005789];intracellular membrane-bounded organelle [GO:0043231];mitochondrion [GO:0005739];peroxisomal membrane [GO:0005778];peroxisome [GO:0005777];plasma membrane [GO:0005886]	arachidonate-CoA ligase activity [GO:0047676];ATP binding [GO:0005524];cholate-CoA ligase activity [GO:0047747];enzyme binding [GO:0019899];fatty acid transmembrane transporter activity [GO:0015245];long-chain fatty acid transporter activity [GO:0005324];long-chain fatty acid-CoA ligase activity [GO:0004467];oleate transmembrane transporter activity [GO:1901480];phytanate-CoA ligase activity [GO:…	endoplasmic reticulum [GO:0005783];endoplasmic reticulum lumen [GO:0005788];endoplasmic reticulum membrane [GO:0005789];intracellular membrane-bounded organelle [GO:0043231];mitochondrion [GO:0005739];peroxisomal membrane [GO:0005778];peroxisome [GO:0005777];plasma membrane [GO:0005886];arachidonate-CoA ligase activity [GO:0047676];ATP binding [GO:0005524];cholate-CoA ligase activity [GO:0047747]…	GO:0000038;GO:0001561;GO:0001676;GO:0004467;GO:0005324;GO:0005524;GO:0005739;GO:0005777;GO:0005778;GO:0005783;GO:0005788;GO:0005789;GO:0005886;GO:0006635;GO:0006699;GO:0015245;GO:0015908;GO:0019899;GO:0031957;GO:0042760;GO:0043231;GO:0044539;GO:0047676;GO:0047747;GO:0050197;GO:0070251;GO:0097089;GO:1901480	6.2.1.-;6.2.1.15;6.2.1.24;6.2.1.3;6.2.1.7
0.946659	0.187565	1.04951	0.300014	0.138233	0.125347	0.0938339	0.174152	0.230978	0.139162	1.07605	0.509239	0.189417	0.414396	1.78358	1.20975	0	Aldedh	+	10.7429	0	O35945	O35945	AL1A7_MOUSE	Aldh1a7	Aldehyde dehydrogenase, cytosolic 1	3ia_ctrl;3aa_ctrl;3ba_ctrl;3ga_ctrl;3ha_ctrl;3ia_3cb;3aa_3cb;3ba_3cb;3ga_3cb;3ha_3cb;3aa_3ca;3ba_3ca;3ga_3ca;3ha_3ca;3aa_3db;3ba_3db;3ga_3db;3ha_3db;3ba_3eb;3ga_3eb;3ha_3eb;3ba_3da;3ga_3da;3ha_3da;3ba_3ea;3ga_3ea;3ha_3ea;3ba_3ab;3ga_3ab;3ha_3ab;3ba_3fa;3ga_3fa;3ha_3fa;3ba_3bb;3ga_3bb;3ha_3bb;3ha_3gb;3ha_3fb	cellular detoxification of aldehyde [GO:0110095];ethanol catabolic process [GO:0006068];fructosamine catabolic process [GO:0030392];fructose catabolic process [GO:0006001]	cytosol [GO:0005829]	3-chloroallyl aldehyde dehydrogenase activity [GO:0004028];3-deoxyglucosone dehydrogenase activity [GO:0106373];aldehyde dehydrogenase (NAD+) activity [GO:0004029];benzaldehyde dehydrogenase (NAD+) activity [GO:0018479];glyceraldehyde-3-phosphate dehydrogenase (NAD+) (non-phosphorylating) activity [GO:0043878];identical protein binding [GO:0042802]	cytosol [GO:0005829];3-chloroallyl aldehyde dehydrogenase activity [GO:0004028];3-deoxyglucosone dehydrogenase activity [GO:0106373];aldehyde dehydrogenase (NAD+) activity [GO:0004029];benzaldehyde dehydrogenase (NAD+) activity [GO:0018479];glyceraldehyde-3-phosphate dehydrogenase (NAD+) (non-phosphorylating) activity [GO:0043878];identical protein binding [GO:0042802];cellular detoxification of …	GO:0004028;GO:0004029;GO:0005829;GO:0006001;GO:0006068;GO:0018479;GO:0030392;GO:0042802;GO:0043878;GO:0106373;GO:0110095	1.2.1.3
0.868582	1.00679	1.28297	1.57589	1.38352	1.19047	1.04862	1.09418	0.903546	0.00537395	1.41116	1.52761	1.27255	1.65154	0.436767	0.0483551	0	Ald_Xan_dh_C;Ald_Xan_dh_C2;CO_deh_flav_C;FAD_binding_5;Fer2;Fer2_2	+	7.23067	0	O54754	O54754	AOXA_MOUSE	Aox1	Aldehyde oxidase 1	3fa_ctrl;3db_ctrl;3ba_ctrl;3bb_ctrl;3da_ctrl;3ga_ctrl;3fb_ctrl;3gb_ctrl;3fa_3ia;3db_3ia;3ba_3ia;3bb_3ia;3da_3ia;3ga_3ia;3fb_3ia;3gb_3ia;3db_3eb;3ba_3eb;3bb_3eb;3da_3eb;3ga_3eb;3fb_3eb;3gb_3eb;3fb_3ha;3gb_3ha	lipid metabolic process [GO:0006629];xenobiotic metabolic process [GO:0006805]	cytosol [GO:0005829]	2 iron, 2 sulfur cluster binding [GO:0051537];aldehyde oxidase activity [GO:0004031];electron transfer activity [GO:0009055];FAD binding [GO:0071949];flavin adenine dinucleotide binding [GO:0050660];identical protein binding [GO:0042802];iron ion binding [GO:0005506];molybdopterin cofactor binding [GO:0043546];NAD binding [GO:0051287];protein homodimerization activity [GO:0042803]	cytosol [GO:0005829];2 iron, 2 sulfur cluster binding [GO:0051537];aldehyde oxidase activity [GO:0004031];electron transfer activity [GO:0009055];FAD binding [GO:0071949];flavin adenine dinucleotide binding [GO:0050660];identical protein binding [GO:0042802];iron ion binding [GO:0005506];molybdopterin cofactor binding [GO:0043546];NAD binding [GO:0051287];protein homodimerization activity [GO:004…	GO:0004031;GO:0005506;GO:0005829;GO:0006629;GO:0006805;GO:0009055;GO:0042802;GO:0042803;GO:0043546;GO:0050660;GO:0051287;GO:0051537;GO:0071949	1.17.3.-;1.2.3.1
1.29719	0.217982	0.691894	0.446465	0.302504	0.374868	0.283604	0.349772	0.0708313	0.283126	0.452454	0.268483	0.400643	0.136893	0.960083	0.534714	0	adh_short	+	7.36977	0	O54909	O54909	RDH16_MOUSE	Rdh16	Retinol dehydrogenase 16	3ha_3ea;3aa_3ea;3ha_ctrl;3aa_ctrl;3aa_3fb;3aa_3da;3aa_3ab;3aa_3eb;3aa_3ca;3aa_3db;3aa_3gb;3aa_3cb;3aa_3fa;3aa_3bb;3aa_3ga;3aa_3ia;3aa_3ba	9-cis-retinoic acid biosynthetic process [GO:0042904];positive regulation of retinoic acid biosynthetic process [GO:1900054];retinoic acid metabolic process [GO:0042573];retinoid metabolic process [GO:0001523];retinol metabolic process [GO:0042572];steroid metabolic process [GO:0008202]	endoplasmic reticulum lumen [GO:0005788];endoplasmic reticulum membrane [GO:0005789];intracellular membrane-bounded organelle [GO:0043231];organelle membrane [GO:0031090]	11-cis-retinol dehydrogenase [GO:0106429];androstan-3-alpha,17-beta-diol dehydrogenase activity [GO:0047044];androsterone dehydrogenase activity [GO:0047023];identical protein binding [GO:0042802];NAD-retinol dehydrogenase activity [GO:0004745]	endoplasmic reticulum lumen [GO:0005788];endoplasmic reticulum membrane [GO:0005789];intracellular membrane-bounded organelle [GO:0043231];organelle membrane [GO:0031090];11-cis-retinol dehydrogenase [GO:0106429];androstan-3-alpha,17-beta-diol dehydrogenase activity [GO:0047044];androsterone dehydrogenase activity [GO:0047023];identical protein binding [GO:0042802];NAD-retinol dehydrogenase activ…	GO:0001523;GO:0004745;GO:0005788;GO:0005789;GO:0008202;GO:0031090;GO:0042572;GO:0042573;GO:0042802;GO:0042904;GO:0043231;GO:0047023;GO:0047044;GO:0106429;GO:1900054	1.1.1.105;1.1.1.209;1.1.1.315;1.1.1.53
-0.0225182	-0.0748549	-0.14749	0.0371647	-0.00443077	-0.0971966	-0.000164986	-0.0602846	-0.265358	-0.0501261	0.417234	-0.042408	0.512506	0.200958	2.11982	0.389341	0	NNMT_PNMT_TEMT	+	5.93979	0.00130612	O55239	O55239	NNMT_MOUSE	Nnmt	Nicotinamide N-methyltransferase	3ha_3eb;3ha_3gb;3ha_3ea;3ha_3ba;3ha_3db;3ha_3ab;3ha_3cb;3ha_3da;3ha_ctrl;3ha_3aa;3ha_3bb;3ha_3ca;3ha_3fb;3ha_3ga;3ha_3ia;3ha_3fa	animal organ regeneration [GO:0031100];methylation [GO:0032259];nicotinamide metabolic process [GO:0006769];positive regulation of gluconeogenesis [GO:0045722];positive regulation of protein deacetylation [GO:0090312];regulation of histone methylation [GO:0031060];response to organonitrogen compound [GO:0010243];response to xenobiotic stimulus [GO:0009410]	cytosol [GO:0005829]	nicotinamide N-methyltransferase activity [GO:0008112]	cytosol [GO:0005829];nicotinamide N-methyltransferase activity [GO:0008112];animal organ regeneration [GO:0031100];methylation [GO:0032259];nicotinamide metabolic process [GO:0006769];positive regulation of gluconeogenesis [GO:0045722];positive regulation of protein deacetylation [GO:0090312];regulation of histone methylation [GO:0031060];response to organonitrogen compound [GO:0010243];response …	GO:0005829;GO:0006769;GO:0008112;GO:0009410;GO:0010243;GO:0031060;GO:0031100;GO:0032259;GO:0045722;GO:0090312	2.1.1.1
0.118064	-0.0386543	-0.0712595	0.311096	0.0809212	-0.0825262	0.0680437	0.0893793	0.116972	-0.172029	0.357089	0.138318	-0.00547695	0.056241	1.23124	0.612143	0	ERG2_Sigma1R	+	6.60728	0.000571429	O55242	O55242	SGMR1_MOUSE	Sigmar1	Sigma non-opioid intracellular receptor 1	3ha_3eb;3ha_3fa;3ha_3ca;3ha_3da;3ha_3ea;3ha_3gb;3ha_3ab;3ha_3ba;3ha_ctrl;3ha_3db;3ha_3cb;3ha_3fb;3ha_3aa;3ha_3bb;3ha_3ga	cell death in response to hydrogen peroxide [GO:0036474];lipid transport [GO:0006869];nervous system development [GO:0007399];protein homotrimerization [GO:0070207];regulation of neuron apoptotic process [GO:0043523]	anchoring junction [GO:0070161];cytoplasmic vesicle [GO:0031410];endoplasmic reticulum [GO:0005783];endoplasmic reticulum membrane [GO:0005789];growth cone [GO:0030426];lipid droplet [GO:0005811];membrane [GO:0016020];nuclear envelope [GO:0005635];nuclear inner membrane [GO:0005637];nuclear outer membrane [GO:0005640];postsynaptic density [GO:0014069];postsynaptic density membrane [GO:0098839]	G protein-coupled opioid receptor activity [GO:0004985];identical protein binding [GO:0042802];signaling receptor activity [GO:0038023]	anchoring junction [GO:0070161];cytoplasmic vesicle [GO:0031410];endoplasmic reticulum [GO:0005783];endoplasmic reticulum membrane [GO:0005789];growth cone [GO:0030426];lipid droplet [GO:0005811];membrane [GO:0016020];nuclear envelope [GO:0005635];nuclear inner membrane [GO:0005637];nuclear outer membrane [GO:0005640];postsynaptic density [GO:0014069];postsynaptic density membrane [GO:0098839];G …	GO:0004985;GO:0005635;GO:0005637;GO:0005640;GO:0005783;GO:0005789;GO:0005811;GO:0006869;GO:0007399;GO:0014069;GO:0016020;GO:0030426;GO:0031410;GO:0036474;GO:0038023;GO:0042802;GO:0043523;GO:0070161;GO:0070207;GO:0098839
1.44927	0.282255	1.06011	0.88068	1.35796	0.400958	1.36506	0.774116	0.028511	-0.102245	1.36224	0.802305	0.949465	0.706154	1.57698	1.18404	0	Heme_oxygenase	+	5.91137	0.00128	O70252	O70252	HMOX2_MOUSE	Hmox2	Heme oxygenase 2	3ca_3eb;3da_3eb;3ga_3eb;3ha_3eb;3aa_3eb;3ca_3ea;3da_3ea;3ga_3ea;3ha_3ea;3aa_3ea;3ca_ctrl;3da_ctrl;3ga_ctrl;3ha_ctrl;3aa_ctrl	heme catabolic process [GO:0042167];heme oxidation [GO:0006788];response to hypoxia [GO:0001666];response to oxidative stress [GO:0006979]	endoplasmic reticulum membrane [GO:0005789];plasma membrane [GO:0005886]	heme binding [GO:0020037];heme oxygenase (decyclizing) activity [GO:0004392];metal ion binding [GO:0046872]	endoplasmic reticulum membrane [GO:0005789];plasma membrane [GO:0005886];heme binding [GO:0020037];heme oxygenase (decyclizing) activity [GO:0004392];metal ion binding [GO:0046872];heme catabolic process [GO:0042167];heme oxidation [GO:0006788];response to hypoxia [GO:0001666];response to oxidative stress [GO:0006979]	GO:0001666;GO:0004392;GO:0005789;GO:0005886;GO:0006788;GO:0006979;GO:0020037;GO:0042167;GO:0046872	1.14.14.18
2.53456	0.949739	1.03631	0.396755	0.0956688	0.105431	0.201101	0.0294819	-0.058567	0.0756168	0.442749	0.139202	0.0805664	0.0530434	0.785343	1.24676	0	adh_short	+	22.3419	0	O88451	O88451;Q9R092	RDH7_MOUSE	Rdh7	Retinol dehydrogenase 7	3ha_ctrl;3ab_ctrl;3ba_ctrl;3ia_ctrl;3aa_ctrl;3ha_3ea;3ab_3ea;3ba_3ea;3ia_3ea;3aa_3ea;3ha_3cb;3ab_3cb;3ba_3cb;3ia_3cb;3aa_3cb;3ha_3db;3ab_3db;3ba_3db;3ia_3db;3aa_3db;3ha_3fb;3ab_3fb;3ba_3fb;3ia_3fb;3aa_3fb;3ab_3eb;3ba_3eb;3ia_3eb;3aa_3eb;3ab_3da;3ba_3da;3ia_3da;3aa_3da;3ab_3fa;3ba_3fa;3ia_3fa;3aa_3fa;3ab_3gb;3ba_3gb;3ia_3gb;3aa_3gb;3ab_3ca;3ba_3ca;3ia_3ca;3aa_3ca;3aa_3bb;3aa_3ga;3aa_3ha;3aa_3ab;3a…	retinol metabolic process [GO:0042572];steroid metabolic process [GO:0008202]	endoplasmic reticulum [GO:0005783];intracellular membrane-bounded organelle [GO:0043231]	androstan-3-alpha,17-beta-diol dehydrogenase activity [GO:0047044];androsterone dehydrogenase activity [GO:0047023];catalytic activity [GO:0003824];NAD-retinol dehydrogenase activity [GO:0004745]	endoplasmic reticulum [GO:0005783];intracellular membrane-bounded organelle [GO:0043231];androstan-3-alpha,17-beta-diol dehydrogenase activity [GO:0047044];androsterone dehydrogenase activity [GO:0047023];catalytic activity [GO:0003824];NAD-retinol dehydrogenase activity [GO:0004745];retinol metabolic process [GO:0042572];steroid metabolic process [GO:0008202]	GO:0003824;GO:0004745;GO:0005783;GO:0008202;GO:0042572;GO:0043231;GO:0047023;GO:0047044	1.1.1.105
-0.145874	-0.117313	-0.131618	-0.109173	0.333981	0.00278854	-0.239498	-0.153275	-0.22744	-0.15991	-0.213697	-0.0320148	-0.389151	-0.148178	-0.383125	-0.212671	0	Ferrochelatase	+	3.66468	0.024092	P22315	P22315	HEMH_MOUSE	Fech	Ferrochelatase, mitochondrial	3da_3ha;3da_3fa;3da_3ca;3da_3eb;3da_3cb;3da_3ia;3da_3ga;3da_3gb;3da_3fb;3da_3aa;3da_3ba;3da_3ea;3da_3db;3da_3ab;3da_3bb	cholesterol metabolic process [GO:0008203];detection of UV [GO:0009589];erythrocyte differentiation [GO:0030218];heme biosynthetic process [GO:0006783];multicellular organismal-level iron ion homeostasis [GO:0060586];porphyrin-containing compound biosynthetic process [GO:0006779];protoporphyrinogen IX metabolic process [GO:0046501];regulation of eIF2 alpha phosphorylation by heme [GO:0010999];reg…	mitochondrial inner membrane [GO:0005743];mitochondrion [GO:0005739]	2 iron, 2 sulfur cluster binding [GO:0051537];ferrochelatase activity [GO:0004325];heme binding [GO:0020037];iron ion binding [GO:0005506];iron-responsive element binding [GO:0030350];protein homodimerization activity [GO:0042803];tetrapyrrole binding [GO:0046906]	mitochondrial inner membrane [GO:0005743];mitochondrion [GO:0005739];2 iron, 2 sulfur cluster binding [GO:0051537];ferrochelatase activity [GO:0004325];heme binding [GO:0020037];iron ion binding [GO:0005506];iron-responsive element binding [GO:0030350];protein homodimerization activity [GO:0042803];tetrapyrrole binding [GO:0046906];cholesterol metabolic process [GO:0008203];detection of UV [GO:00…	GO:0004325;GO:0005506;GO:0005739;GO:0005743;GO:0006779;GO:0006783;GO:0008203;GO:0009416;GO:0009589;GO:0010468;GO:0010999;GO:0020037;GO:0030218;GO:0030350;GO:0034379;GO:0042803;GO:0046501;GO:0046906;GO:0046984;GO:0051537;GO:0060586	4.98.1.1
0.822325	0.439297	0.818405	1.14587	1.92237	1.13475	2.33082	1.82218	0.233292	0.0799141	1.68547	1.47655	1.41776	1.79594	1.38026	1.51163	0	p450	+	9.56824	0	P24456	P24456	CP2DA_MOUSE	Cyp2d10	Cytochrome P450 2D10	3fa_ctrl;3gb_ctrl;3ia_ctrl;3ha_ctrl;3cb_ctrl;3fb_ctrl;3ga_ctrl;3da_ctrl;3ca_ctrl;3ia_3eb;3ha_3eb;3cb_3eb;3fb_3eb;3ga_3eb;3da_3eb;3ca_3eb;3cb_3ea;3fb_3ea;3ga_3ea;3da_3ea;3ca_3ea;3fb_3ab;3ga_3ab;3da_3ab;3ca_3ab;3ca_3aa;3ca_3ba	arachidonic acid metabolic process [GO:0019369];xenobiotic metabolic process [GO:0006805]	cytoplasm [GO:0005737];endoplasmic reticulum membrane [GO:0005789];intracellular membrane-bounded organelle [GO:0043231];mitochondrion [GO:0005739]	anandamide 11,12 epoxidase activity [GO:0062188];anandamide 14,15 epoxidase activity [GO:0062189];anandamide 8,9 epoxidase activity [GO:0062187];aromatase activity [GO:0070330];heme binding [GO:0020037];iron ion binding [GO:0005506];monooxygenase activity [GO:0004497];oxidoreductase activity [GO:0016491];oxidoreductase activity, acting on paired donors, with incorporation or reduction of molecula…	cytoplasm [GO:0005737];endoplasmic reticulum membrane [GO:0005789];intracellular membrane-bounded organelle [GO:0043231];mitochondrion [GO:0005739];anandamide 11,12 epoxidase activity [GO:0062188];anandamide 14,15 epoxidase activity [GO:0062189];anandamide 8,9 epoxidase activity [GO:0062187];aromatase activity [GO:0070330];heme binding [GO:0020037];iron ion binding [GO:0005506];monooxygenase acti…	GO:0004497;GO:0005506;GO:0005737;GO:0005739;GO:0005789;GO:0006805;GO:0016491;GO:0016712;GO:0019369;GO:0020037;GO:0043231;GO:0062187;GO:0062188;GO:0062189;GO:0070330	1.14.14.1
0.41173	0.145283	0.50574	0.789948	1.05173	0.429814	0.785539	0.530034	-0.131462	-0.0428162	1.03965	0.888149	0.39497	0.747634	0.5453	0.654845	0	p450	+	3.9652	0.0162133	P24457	P24457	CP2DB_MOUSE	Cyp2d11	Cytochrome P450 2D11	3da_ctrl;3ga_ctrl;3da_3ea;3ga_3ea;3da_3eb;3ga_3eb;3ga_3ab	arachidonic acid metabolic process [GO:0019369];xenobiotic metabolic process [GO:0006805]	cytoplasm [GO:0005737];endoplasmic reticulum membrane [GO:0005789];intracellular membrane-bounded organelle [GO:0043231];mitochondrion [GO:0005739]	anandamide 11,12 epoxidase activity [GO:0062188];anandamide 14,15 epoxidase activity [GO:0062189];anandamide 8,9 epoxidase activity [GO:0062187];aromatase activity [GO:0070330];heme binding [GO:0020037];iron ion binding [GO:0005506];monooxygenase activity [GO:0004497];oxidoreductase activity [GO:0016491];oxidoreductase activity, acting on paired donors, with incorporation or reduction of molecula…	cytoplasm [GO:0005737];endoplasmic reticulum membrane [GO:0005789];intracellular membrane-bounded organelle [GO:0043231];mitochondrion [GO:0005739];anandamide 11,12 epoxidase activity [GO:0062188];anandamide 14,15 epoxidase activity [GO:0062189];anandamide 8,9 epoxidase activity [GO:0062187];aromatase activity [GO:0070330];heme binding [GO:0020037];iron ion binding [GO:0005506];monooxygenase acti…	GO:0004497;GO:0005506;GO:0005737;GO:0005739;GO:0005789;GO:0006805;GO:0016491;GO:0016712;GO:0019369;GO:0020037;GO:0043231;GO:0062187;GO:0062188;GO:0062189;GO:0070330	1.14.14.1
0.471405	0.332596	0.0851936	0.143227	0.0896187	-0.0304642	0.151821	0.0908871	0.173529	0.128305	0.111729	0.11343	0.16185	0.141935	0.966789	0.158073	0	Aldedh	+	4.99162	0.0040678	P24549	P24549	AL1A1_MOUSE	Aldh1a1	Aldehyde dehydrogenase 1A1	3ha_3db;3ha_ctrl;3ha_3cb;3ha_3gb;3ha_3da;3ha_3eb;3ha_3fa;3ha_3ca;3ha_3ea;3ha_3bb;3ha_3ba;3ha_3fb;3ha_3ia;3ha_3ga;3ha_3ab;3ha_3aa	9-cis-retinoic acid biosynthetic process [GO:0042904];9-cis-retinoic acid metabolic process [GO:0042905];apoptotic process [GO:0006915];cellular detoxification of aldehyde [GO:0110095];embryonic eye morphogenesis [GO:0048048];fructosamine catabolic process [GO:0030392];fructose catabolic process [GO:0006001];gamma-aminobutyric acid biosynthetic process [GO:0009449];maintenance of lens transparenc…	axon [GO:0030424];cytoplasm [GO:0005737];cytosol [GO:0005829];nucleus [GO:0005634];synapse [GO:0045202]	3-chloroallyl aldehyde dehydrogenase activity [GO:0004028];3-deoxyglucosone dehydrogenase activity [GO:0106373];aldehyde dehydrogenase (NAD+) activity [GO:0004029];aminobutyraldehyde dehydrogenase activity [GO:0019145];benzaldehyde dehydrogenase (NAD+) activity [GO:0018479];glyceraldehyde-3-phosphate dehydrogenase (NAD+) (non-phosphorylating) activity [GO:0043878];identical protein binding [GO:00…	axon [GO:0030424];cytoplasm [GO:0005737];cytosol [GO:0005829];nucleus [GO:0005634];synapse [GO:0045202];3-chloroallyl aldehyde dehydrogenase activity [GO:0004028];3-deoxyglucosone dehydrogenase activity [GO:0106373];aldehyde dehydrogenase (NAD+) activity [GO:0004029];aminobutyraldehyde dehydrogenase activity [GO:0019145];benzaldehyde dehydrogenase (NAD+) activity [GO:0018479];glyceraldehyde-3-pho…	GO:0001523;GO:0001758;GO:0002072;GO:0002138;GO:0004028;GO:0004029;GO:0005634;GO:0005737;GO:0005829;GO:0006001;GO:0006915;GO:0006979;GO:0009410;GO:0009449;GO:0018479;GO:0019145;GO:0030392;GO:0030424;GO:0036438;GO:0042572;GO:0042573;GO:0042802;GO:0042904;GO:0042905;GO:0043065;GO:0043878;GO:0045202;GO:0045471;GO:0048048;GO:0051287;GO:0106373;GO:0110095;GO:0120163	1.2.1.19;1.2.1.28;1.2.1.3;1.2.1.36
0.29036	0.7316	0.319785	1.05247	0.0432625	-0.00395584	0.0163097	0.0783854	-0.18545	-0.131128	0.583618	0.261508	0.339199	0.169748	0.23423	0.284575	0	FAD_binding_1;Flavodoxin_1;NAD_binding_1	+	4.93996	0.00406667	P37040	P37040	NCPR_MOUSE	Por	NADPH--cytochrome P450 reductase	3ga_3ea;3ab_3ea;3bb_3ea;3bb_3eb;3bb_3da;3bb_ctrl;3bb_3ca;3bb_3cb;3bb_3db;3bb_3ha;3bb_3fa;3bb_3fb;3bb_3ia	carnitine metabolic process [GO:0009437];cellular organofluorine metabolic process [GO:0090346];cellular response to follicle-stimulating hormone stimulus [GO:0071372];cellular response to peptide hormone stimulus [GO:0071375];demethylation [GO:0070988];electron transport chain [GO:0022900];fatty acid oxidation [GO:0019395];flavonoid metabolic process [GO:0009812];internal peptidyl-lysine acetyla…	cytosol [GO:0005829];endoplasmic reticulum membrane [GO:0005789];intracellular membrane-bounded organelle [GO:0043231];membrane [GO:0016020];mitochondrion [GO:0005739]	cytochrome-b5 reductase activity, acting on NAD(P)H [GO:0004128];electron transfer activity [GO:0009055];enzyme binding [GO:0019899];flavin adenine dinucleotide binding [GO:0050660];FMN binding [GO:0010181];hydrolase activity [GO:0016787];iron-cytochrome-c reductase activity [GO:0047726];NADP binding [GO:0050661];NADPH-hemoprotein reductase activity [GO:0003958];nitric oxide dioxygenase activity …	cytosol [GO:0005829];endoplasmic reticulum membrane [GO:0005789];intracellular membrane-bounded organelle [GO:0043231];membrane [GO:0016020];mitochondrion [GO:0005739];cytochrome-b5 reductase activity, acting on NAD(P)H [GO:0004128];electron transfer activity [GO:0009055];enzyme binding [GO:0019899];flavin adenine dinucleotide binding [GO:0050660];FMN binding [GO:0010181];hydrolase activity [GO:0…	GO:0003420;GO:0003958;GO:0004128;GO:0005739;GO:0005789;GO:0005829;GO:0007584;GO:0008941;GO:0009055;GO:0009410;GO:0009437;GO:0009725;GO:0009812;GO:0010181;GO:0016020;GO:0016491;GO:0016787;GO:0018393;GO:0019395;GO:0019899;GO:0022900;GO:0032332;GO:0032770;GO:0043066;GO:0043154;GO:0043231;GO:0043602;GO:0045542;GO:0045880;GO:0046210;GO:0047726;GO:0050660;GO:0050661;GO:0060192;GO:0070988;GO:0071372;GO:…	1.6.2.4
0.00581169	0.166695	0.0224323	0.0783215	0.0815887	0.0083046	0.0244408	-0.188707	0.165413	-0.0206203	0.0618629	0.475246	0.0945702	1.35001	0.594952	0.147652	0	HMGL-like	+	10.2982	0	P38060	P38060	HMGCL_MOUSE	Hmgcl	Hydroxymethylglutaryl-CoA lyase, mitochondrial	3gb_3cb;3ha_3cb;3fb_3cb;3gb_3db;3ha_3db;3fb_3db;3gb_3eb;3ha_3eb;3fb_3eb;3ha_ctrl;3fb_ctrl;3fb_3ia;3fb_3ca;3fb_3ba;3fb_3bb;3fb_3aa;3fb_3da;3fb_3ga;3fb_3fa;3fb_3ea;3fb_3ab;3fb_3gb	acyl-CoA metabolic process [GO:0006637];ketone body biosynthetic process [GO:0046951];leucine catabolic process [GO:0006552];lipid metabolic process [GO:0006629];mitochondrion organization [GO:0007005]	mitochondrial inner membrane [GO:0005743];mitochondrial matrix [GO:0005759];mitochondrion [GO:0005739];peroxisome [GO:0005777];protein-containing complex [GO:0032991]	carboxylic acid binding [GO:0031406];fatty-acyl-CoA binding [GO:0000062];hydroxymethylglutaryl-CoA lyase activity [GO:0004419];magnesium ion binding [GO:0000287];manganese ion binding [GO:0030145];metal ion binding [GO:0046872];structural molecule activity [GO:0005198]	mitochondrial inner membrane [GO:0005743];mitochondrial matrix [GO:0005759];mitochondrion [GO:0005739];peroxisome [GO:0005777];protein-containing complex [GO:0032991];carboxylic acid binding [GO:0031406];fatty-acyl-CoA binding [GO:0000062];hydroxymethylglutaryl-CoA lyase activity [GO:0004419];magnesium ion binding [GO:0000287];manganese ion binding [GO:0030145];metal ion binding [GO:0046872];stru…	GO:0000062;GO:0000287;GO:0004419;GO:0005198;GO:0005739;GO:0005743;GO:0005759;GO:0005777;GO:0006552;GO:0006629;GO:0006637;GO:0007005;GO:0030145;GO:0031406;GO:0032991;GO:0046872;GO:0046951	4.1.3.4
0.340238	0.160207	0.0530081	0.197543	0.12202	0.066411	0.246009	0.148593	0.0811663	0.100445	0.246488	0.35686	0.271874	1.5375	1.4874	0.386981	0	Aldedh	+	12.5189	0	P47740	P47740	AL3A2_MOUSE	Aldh3a2	Aldehyde dehydrogenase family 3 member A2	3ha_3ea;3fb_3ea;3ha_3eb;3fb_3eb;3ha_ctrl;3fb_ctrl;3ha_3db;3fb_3db;3ha_3da;3fb_3da;3ha_3ba;3fb_3ba;3ha_3ca;3fb_3ca;3ha_3bb;3fb_3bb;3ha_3cb;3fb_3cb;3ha_3ab;3fb_3ab;3ha_3fa;3fb_3fa;3ha_3ga;3fb_3ga;3ha_3aa;3fb_3aa;3ha_3gb;3fb_3gb;3ha_3ia;3fb_3ia	cellular aldehyde metabolic process [GO:0006081];central nervous system development [GO:0007417];epidermis development [GO:0008544];fatty acid metabolic process [GO:0006631];formaldehyde metabolic process [GO:0046292];hexadecanal metabolic process [GO:0046458];peripheral nervous system development [GO:0007422];phytol metabolic process [GO:0033306];response to reactive oxygen species [GO:0000302];…	cytoplasm [GO:0005737];cytosol [GO:0005829];endoplasmic reticulum [GO:0005783];endoplasmic reticulum membrane [GO:0005789];intracellular membrane-bounded organelle [GO:0043231];membrane [GO:0016020];mitochondrial inner membrane [GO:0005743];mitochondrion [GO:0005739];nucleus [GO:0005634];peroxisome [GO:0005777]	3-chloroallyl aldehyde dehydrogenase activity [GO:0004028];aldehyde dehydrogenase (NAD+) activity [GO:0004029];glyceraldehyde-3-phosphate dehydrogenase (NAD+) (non-phosphorylating) activity [GO:0043878];long-chain-alcohol oxidase activity [GO:0046577];long-chain-aldehyde dehydrogenase activity [GO:0050061];medium-chain-aldehyde dehydrogenase activity [GO:0052814];protein homodimerization activity…	cytoplasm [GO:0005737];cytosol [GO:0005829];endoplasmic reticulum [GO:0005783];endoplasmic reticulum membrane [GO:0005789];intracellular membrane-bounded organelle [GO:0043231];membrane [GO:0016020];mitochondrial inner membrane [GO:0005743];mitochondrion [GO:0005739];nucleus [GO:0005634];peroxisome [GO:0005777];3-chloroallyl aldehyde dehydrogenase activity [GO:0004028];aldehyde dehydrogenase (NAD…	GO:0000302;GO:0004028;GO:0004029;GO:0005634;GO:0005737;GO:0005739;GO:0005743;GO:0005777;GO:0005783;GO:0005789;GO:0005829;GO:0006081;GO:0006631;GO:0006714;GO:0007417;GO:0007422;GO:0008544;GO:0016020;GO:0033306;GO:0042803;GO:0043231;GO:0043878;GO:0046292;GO:0046458;GO:0046577;GO:0050061;GO:0052814	1.2.1.3;1.2.1.94
1.76633	0.808405	0.988784	0.797127	0.180367	0.0336275	-0.0822515	0.0731897	-0.372613	-0.191211	0.708798	0.196854	0.362083	-0.0561371	0.904092	0.624175	0	FMO-like	+	11.4997	0	P50285	P50285	FMO1_MOUSE	Fmo1	Flavin-containing monooxygenase 1	3bb_3ea;3ab_3ea;3ha_3ea;3ga_3ea;3ba_3ea;3aa_3ea;3ba_3eb;3aa_3eb;3ba_3fb;3aa_3fb;3ba_ctrl;3aa_ctrl;3aa_3ca;3aa_3db;3aa_3cb;3aa_3gb;3aa_3da;3aa_3fa;3aa_3ia;3aa_3bb;3aa_3ab;3aa_3ha;3aa_3ga;3aa_3ba	energy homeostasis [GO:0097009];NADPH oxidation [GO:0070995];negative regulation of fatty acid oxidation [GO:0046322];organic acid metabolic process [GO:0006082];response to lipopolysaccharide [GO:0032496];response to osmotic stress [GO:0006970];taurine biosynthetic process [GO:0042412];toxin metabolic process [GO:0009404];xenobiotic metabolic process [GO:0006805]	endoplasmic reticulum membrane [GO:0005789];intracellular membrane-bounded organelle [GO:0043231]	flavin adenine dinucleotide binding [GO:0050660];hypotaurine dehydrogenase activity [GO:0047822];monooxygenase activity [GO:0004497];N,N-dimethylaniline monooxygenase activity [GO:0004499];NADP binding [GO:0050661];trimethylamine monooxygenase activity [GO:0034899]	endoplasmic reticulum membrane [GO:0005789];intracellular membrane-bounded organelle [GO:0043231];flavin adenine dinucleotide binding [GO:0050660];hypotaurine dehydrogenase activity [GO:0047822];monooxygenase activity [GO:0004497];N,N-dimethylaniline monooxygenase activity [GO:0004499];NADP binding [GO:0050661];trimethylamine monooxygenase activity [GO:0034899];energy homeostasis [GO:0097009];NAD…	GO:0004497;GO:0004499;GO:0005789;GO:0006082;GO:0006805;GO:0006970;GO:0009404;GO:0032496;GO:0034899;GO:0042412;GO:0043231;GO:0046322;GO:0047822;GO:0050660;GO:0050661;GO:0070995;GO:0097009	1.14.13.148;1.14.13.8
0.295725	-0.00573921	0.235243	0.04459	0.0175915	-0.0278492	-0.0296783	-0.0618401	-0.0321369	0.00402832	0.722483	0.290865	0.175203	0.298407	0.449821	0.353464	0	Acyl-CoA_dh_1;Acyl-CoA_dh_M;Acyl-CoA_dh_N	+	6.68522	0.0006	P50544	P50544	ACADV_MOUSE	Acadvl	Very long-chain specific acyl-CoA dehydrogenase, mitochondrial	3ia_3ea;3ha_3ea;3ga_3ea;3ga_ctrl;3ga_3db;3ha_3cb;3ga_3cb;3ga_3ca;3ga_3ab;3ga_3da;3ga_3eb;3ga_3bb;3ga_3fa;3ga_3aa	epithelial cell differentiation [GO:0030855];fatty acid beta-oxidation [GO:0006635];fatty acid beta-oxidation using acyl-CoA dehydrogenase [GO:0033539];fatty acid catabolic process [GO:0009062];negative regulation of fatty acid biosynthetic process [GO:0045717];negative regulation of fatty acid oxidation [GO:0046322];regulation of cholesterol metabolic process [GO:0090181];response to cold [GO:00…	extrinsic component of mitochondrial inner membrane [GO:0031314];mitochondrial inner membrane [GO:0005743];mitochondrial membrane [GO:0031966];mitochondrial nucleoid [GO:0042645];mitochondrion [GO:0005739];nucleolus [GO:0005730];nucleoplasm [GO:0005654]	acyl-CoA dehydrogenase activity [GO:0003995];fatty-acyl-CoA binding [GO:0000062];flavin adenine dinucleotide binding [GO:0050660];identical protein binding [GO:0042802];long-chain-acyl-CoA dehydrogenase activity [GO:0004466];very-long-chain-acyl-CoA dehydrogenase activity [GO:0017099]	extrinsic component of mitochondrial inner membrane [GO:0031314];mitochondrial inner membrane [GO:0005743];mitochondrial membrane [GO:0031966];mitochondrial nucleoid [GO:0042645];mitochondrion [GO:0005739];nucleolus [GO:0005730];nucleoplasm [GO:0005654];acyl-CoA dehydrogenase activity [GO:0003995];fatty-acyl-CoA binding [GO:0000062];flavin adenine dinucleotide binding [GO:0050660];identical prote…	GO:0000062;GO:0001659;GO:0003995;GO:0004466;GO:0005654;GO:0005730;GO:0005739;GO:0005743;GO:0006635;GO:0009062;GO:0009409;GO:0017099;GO:0030855;GO:0031314;GO:0031966;GO:0033539;GO:0042645;GO:0042802;GO:0045717;GO:0046322;GO:0050660;GO:0090181	1.3.8.9
0.279016	0.0373793	0.46251	0.379906	0.558984	-0.0810881	-0.12272	-0.136826	-0.141942	0.0475693	0.640768	0.083333	0.243808	-0.185271	0.154376	0.296334	0	Amino_oxidase	+	3.95316	0.0162632	P51175	P51175	PPOX_MOUSE	Ppox	Protoporphyrinogen oxidase	3da_3cb;3ga_3cb;3da_3fb;3ga_3fb;3da_3ea;3ga_3ea	heme biosynthetic process [GO:0006783];porphyrin-containing compound biosynthetic process [GO:0006779];protoporphyrinogen IX biosynthetic process [GO:0006782];protoporphyrinogen IX metabolic process [GO:0046501];response to xenobiotic stimulus [GO:0009410]	mitochondrial inner membrane [GO:0005743];mitochondrial membrane [GO:0031966];mitochondrion [GO:0005739]	oxygen-dependent protoporphyrinogen oxidase activity [GO:0004729]	mitochondrial inner membrane [GO:0005743];mitochondrial membrane [GO:0031966];mitochondrion [GO:0005739];oxygen-dependent protoporphyrinogen oxidase activity [GO:0004729];heme biosynthetic process [GO:0006783];porphyrin-containing compound biosynthetic process [GO:0006779];protoporphyrinogen IX biosynthetic process [GO:0006782];protoporphyrinogen IX metabolic process [GO:0046501];response to xeno…	GO:0004729;GO:0005739;GO:0005743;GO:0006779;GO:0006782;GO:0006783;GO:0009410;GO:0031966;GO:0046501	1.3.3.4
0.718708	-0.218507	0.297898	0.0396605	-0.0257339	-0.200483	-0.012578	-0.160644	-0.376574	-0.336299	0.584748	-0.0740356	0.124455	-0.0578985	1.05713	0.261829	0	adh_short	+	6.18055	0.00104348	P51658	P51658	DHB2_MOUSE	Hsd17b2	Estradiol 17-beta-dehydrogenase 2	3aa_3eb;3ha_3eb;3aa_3ea;3ha_3ea;3aa_ctrl;3ha_ctrl;3aa_3ab;3ha_3ab;3aa_3db;3ha_3db;3aa_3gb;3ha_3gb;3aa_3fb;3ha_3fb;3aa_3cb;3ha_3cb;3aa_3bb;3ha_3bb;3aa_3da;3ha_3da;3ha_3fa;3ha_3ca	androgen biosynthetic process [GO:0006702];androgen metabolic process [GO:0008209];estrogen biosynthetic process [GO:0006703];in utero embryonic development [GO:0001701];placenta development [GO:0001890];response to retinoic acid [GO:0032526];steroid metabolic process [GO:0008202]	endoplasmic reticulum membrane [GO:0005789];intracellular membrane-bounded organelle [GO:0043231]	17-beta-hydroxysteroid dehydrogenase (NAD+) activity [GO:0044594];estradiol 17-beta-dehydrogenase [NAD(P)] activity [GO:0004303];testosterone dehydrogenase (NAD+) activity [GO:0047035]	endoplasmic reticulum membrane [GO:0005789];intracellular membrane-bounded organelle [GO:0043231];17-beta-hydroxysteroid dehydrogenase (NAD+) activity [GO:0044594];estradiol 17-beta-dehydrogenase [NAD(P)] activity [GO:0004303];testosterone dehydrogenase (NAD+) activity [GO:0047035];androgen biosynthetic process [GO:0006702];androgen metabolic process [GO:0008209];estrogen biosynthetic process [GO…	GO:0001701;GO:0001890;GO:0004303;GO:0005789;GO:0006702;GO:0006703;GO:0008202;GO:0008209;GO:0032526;GO:0043231;GO:0044594;GO:0047035	1.1.1.239;1.1.1.62
0.0937719	-0.0683708	-0.099884	-0.108706	-0.107911	0.0123825	-0.156548	-0.163496	-0.398352	-0.150515	0.481586	0.968191	-0.0222931	0.454252	0.378969	0.116734	0	ALO;FAD_binding_4	+	6.24197	0.00106667	P58710	P58710	GGLO_MOUSE	Gulo	L-gulonolactone oxidase	3fb_3ea;3ga_3ea;3gb_3ea;3ga_3eb;3gb_3eb;3ga_ctrl;3gb_ctrl;3ga_3ca;3gb_3ca;3ga_3ab;3gb_3ab;3ga_3ba;3gb_3ba;3gb_3bb;3ga_3cb;3gb_3cb;3gb_3fa;3gb_3da;3gb_3ia;3gb_3aa	L-ascorbic acid biosynthetic process [GO:0019853]	endoplasmic reticulum membrane [GO:0005789]	D-arabinono-1,4-lactone oxidase activity [GO:0003885];FAD binding [GO:0071949];flavin adenine dinucleotide binding [GO:0050660];L-gulonolactone oxidase activity [GO:0050105];oxidoreductase activity [GO:0016491]	endoplasmic reticulum membrane [GO:0005789];D-arabinono-1,4-lactone oxidase activity [GO:0003885];FAD binding [GO:0071949];flavin adenine dinucleotide binding [GO:0050660];L-gulonolactone oxidase activity [GO:0050105];oxidoreductase activity [GO:0016491];L-ascorbic acid biosynthetic process [GO:0019853]	GO:0003885;GO:0005789;GO:0016491;GO:0019853;GO:0050105;GO:0050660;GO:0071949	1.1.3.8
0.272943	0.131611	0.16374	0.195103	0.0574913	0.137375	0.134434	0.116344	-0.105627	0.114983	0.184502	0.102436	0.083168	0.226042	0.218344	0.375034	0	Ribosomal_S8	+	3.7176	0.0220476	P62245	P62245	RS15A_MOUSE	Rps15a	40S ribosomal protein S15a	3bb_3ea;3aa_3ea;3ia_3ea;3ia_3fa;3ia_ctrl	cytoplasmic translation [GO:0002181];positive regulation of cell cycle [GO:0045787];positive regulation of cell population proliferation [GO:0008284];response to virus [GO:0009615];ribosomal small subunit biogenesis [GO:0042274];translation at postsynapse [GO:0140242];translation at presynapse [GO:0140236]	cytoplasm [GO:0005737];cytosol [GO:0005829];cytosolic ribosome [GO:0022626];cytosolic small ribosomal subunit [GO:0022627];mitochondrion [GO:0005739];postsynapse [GO:0098794];presynapse [GO:0098793];ribosome [GO:0005840];small-subunit processome [GO:0032040];synapse [GO:0045202]	structural constituent of ribosome [GO:0003735]	cytoplasm [GO:0005737];cytosol [GO:0005829];cytosolic ribosome [GO:0022626];cytosolic small ribosomal subunit [GO:0022627];mitochondrion [GO:0005739];postsynapse [GO:0098794];presynapse [GO:0098793];ribosome [GO:0005840];small-subunit processome [GO:0032040];synapse [GO:0045202];structural constituent of ribosome [GO:0003735];cytoplasmic translation [GO:0002181];positive regulation of cell cycle …	GO:0002181;GO:0003735;GO:0005737;GO:0005739;GO:0005829;GO:0005840;GO:0008284;GO:0009615;GO:0022626;GO:0022627;GO:0032040;GO:0042274;GO:0045202;GO:0045787;GO:0098793;GO:0098794;GO:0140236;GO:0140242
-0.0336323	-0.178617	-0.0580807	-0.0797901	-0.357235	0.0156059	-0.158758	-0.188801	-0.415812	-0.0181847	0.0575848	-0.129015	-0.0898151	0.0138111	0.580505	-0.0437927	0	Tubulin;Tubulin_C	+	4.83872	0.0047619	P68372	P99024;Q9D6F9;P68372	TBB4B_MOUSE	Tubb4b	Tubulin beta-4B chain	3ga_3ea;3fb_3ea;3ha_3ea;3ha_3da;3ha_3cb;3ha_3ab;3ha_3ca;3ha_3eb;3ha_ctrl;3ha_3gb;3ha_3fa;3ha_3bb;3ha_3aa;3ha_3ba;3ha_3db	microtubule cytoskeleton organization [GO:0000226];microtubule-based process [GO:0007017];mitotic cell cycle [GO:0000278]	cytoplasm [GO:0005737];intercellular bridge [GO:0045171];microtubule [GO:0005874];microtubule cytoskeleton [GO:0015630];mitotic spindle [GO:0072686];myelin sheath [GO:0043209];tubulin complex [GO:0045298]	double-stranded RNA binding [GO:0003725];GTP binding [GO:0005525];GTPase activity [GO:0003924];metal ion binding [GO:0046872];structural constituent of cytoskeleton [GO:0005200]	cytoplasm [GO:0005737];intercellular bridge [GO:0045171];microtubule [GO:0005874];microtubule cytoskeleton [GO:0015630];mitotic spindle [GO:0072686];myelin sheath [GO:0043209];tubulin complex [GO:0045298];double-stranded RNA binding [GO:0003725];GTP binding [GO:0005525];GTPase activity [GO:0003924];metal ion binding [GO:0046872];structural constituent of cytoskeleton [GO:0005200];microtubule cyto…	GO:0000226;GO:0000278;GO:0003725;GO:0003924;GO:0005200;GO:0005525;GO:0005737;GO:0005874;GO:0007017;GO:0015630;GO:0043209;GO:0045171;GO:0045298;GO:0046872;GO:0072686
0.135433	0.0903673	-0.0193815	0.128787	-0.0794926	-0.0535717	0.0270481	0.00590706	-0.10077	-0.185021	-0.0298147	0.0157166	-0.0262012	0.173182	1.19098	0.153349	0	AIRS;AIRS_C	+	4.68199	0.00621538	P97364	P97364	SPS2_MOUSE	Sephs2	Selenide, water dikinase 2	3ha_3eb;3ha_3da;3ha_3ea;3ha_3db;3ha_3ba;3ha_3ca;3ha_ctrl;3ha_3cb;3ha_3ga;3ha_3gb;3ha_3fa;3ha_3bb;3ha_3ia;3ha_3ab;3ha_3aa;3ha_3fb	phosphorylation [GO:0016310];selenium compound metabolic process [GO:0001887];selenocysteine biosynthetic process [GO:0016260]	cytoplasm [GO:0005737]	ATP binding [GO:0005524];metal ion binding [GO:0046872];selenide, water dikinase activity [GO:0004756]	cytoplasm [GO:0005737];ATP binding [GO:0005524];metal ion binding [GO:0046872];selenide, water dikinase activity [GO:0004756];phosphorylation [GO:0016310];selenium compound metabolic process [GO:0001887];selenocysteine biosynthetic process [GO:0016260]	GO:0001887;GO:0004756;GO:0005524;GO:0005737;GO:0016260;GO:0016310;GO:0046872	2.7.9.3
0.951334	0.995153	1.06634	1.47309	0.423094	0.293398	0.701002	0.709578	0.403021	0.0175467	0.26919	0.153229	0.384846	0.826046	0.261875	0.113001	0	Ald_Xan_dh_C;Ald_Xan_dh_C2;CO_deh_flav_C;FAD_binding_5;Fer2;Fer2_2	+	10.4282	0	Q00519	Q00519	XDH_MOUSE	Xdh	Xanthine dehydrogenase/oxidase	3cb_ctrl;3ab_ctrl;3aa_ctrl;3ba_ctrl;3bb_ctrl;3ab_3eb;3aa_3eb;3ba_3eb;3bb_3eb;3ab_3ia;3aa_3ia;3ba_3ia;3bb_3ia;3ab_3gb;3aa_3gb;3ba_3gb;3bb_3gb;3ab_3ha;3aa_3ha;3ba_3ha;3bb_3ha;3aa_3ga;3ba_3ga;3bb_3ga;3ba_3db;3bb_3db;3bb_3da;3bb_3fa;3bb_3ea	activation of cysteine-type endopeptidase activity involved in apoptotic process [GO:0006919];adenosine catabolic process [GO:0006154];allantoin metabolic process [GO:0000255];amide catabolic process [GO:0043605];AMP catabolic process [GO:0006196];dAMP catabolic process [GO:0046059];deoxyadenosine catabolic process [GO:0006157];deoxyguanosine catabolic process [GO:0006161];deoxyinosine catabolic …	cytosol [GO:0005829];extracellular space [GO:0005615];peroxisome [GO:0005777];sarcoplasmic reticulum [GO:0016529]	2 iron, 2 sulfur cluster binding [GO:0051537];FAD binding [GO:0071949];flavin adenine dinucleotide binding [GO:0050660];hypoxanthine dehydrogenase activity [GO:0070674];hypoxanthine oxidase activity [GO:0070675];identical protein binding [GO:0042802];iron ion binding [GO:0005506];molybdenum ion binding [GO:0030151];molybdopterin cofactor binding [GO:0043546];nitrite reductase (NO-forming) activit…	cytosol [GO:0005829];extracellular space [GO:0005615];peroxisome [GO:0005777];sarcoplasmic reticulum [GO:0016529];2 iron, 2 sulfur cluster binding [GO:0051537];FAD binding [GO:0071949];flavin adenine dinucleotide binding [GO:0050660];hypoxanthine dehydrogenase activity [GO:0070674];hypoxanthine oxidase activity [GO:0070675];identical protein binding [GO:0042802];iron ion binding [GO:0005506];moly…	GO:0000255;GO:0001933;GO:0001937;GO:0004854;GO:0004855;GO:0005506;GO:0005615;GO:0005777;GO:0005829;GO:0006147;GO:0006148;GO:0006149;GO:0006154;GO:0006157;GO:0006161;GO:0006196;GO:0006204;GO:0006919;GO:0007595;GO:0009114;GO:0009115;GO:0010044;GO:0010629;GO:0016226;GO:0016491;GO:0016529;GO:0030151;GO:0030856;GO:0042802;GO:0042803;GO:0043546;GO:0043605;GO:0045602;GO:0046038;GO:0046055;GO:0046059;GO:…	1.17.1.4;1.17.3.2
-0.42835	-0.474722	-0.223644	-0.511251	-0.471979	-0.6359	-0.488123	-0.485905	-0.318426	-0.386099	0.132303	-0.0473042	-0.415339	-0.580423	-0.107328	0.609873	0	Apolipoprotein	+	3.24339	0.0491304	Q00623	Q00623	APOA1_MOUSE	Apoa1	Apolipoprotein A-I	3ga_3db;3ia_3db;3ia_3bb;3ia_3ca;3ia_3cb;3ia_3fb;3ia_3da;3ia_3fa;3ia_3ab	adrenal gland development [GO:0030325];animal organ regeneration [GO:0031100];blood vessel endothelial cell migration [GO:0043534];cholesterol biosynthetic process [GO:0006695];cholesterol efflux [GO:0033344];cholesterol homeostasis [GO:0042632];cholesterol import [GO:0070508];cholesterol metabolic process [GO:0008203];cholesterol transport [GO:0030301];endothelial cell proliferation [GO:0001935]…	cell surface [GO:0009986];cytoplasmic vesicle [GO:0031410];cytosol [GO:0005829];discoidal high-density lipoprotein particle [GO:0034365];endocytic vesicle [GO:0030139];extracellular region [GO:0005576];extracellular space [GO:0005615];high-density lipoprotein particle [GO:0034364];intermediate-density lipoprotein particle [GO:0034363];low-density lipoprotein particle [GO:0034362];nucleus [GO:0005…	amyloid-beta binding [GO:0001540];apolipoprotein A-I receptor binding [GO:0034191];apolipoprotein receptor binding [GO:0034190];chemorepellent activity [GO:0045499];cholesterol binding [GO:0015485];cholesterol transfer activity [GO:0120020];enzyme binding [GO:0019899];heat shock protein binding [GO:0031072];high-density lipoprotein particle binding [GO:0008035];high-density lipoprotein particle r…	cell surface [GO:0009986];cytoplasmic vesicle [GO:0031410];cytosol [GO:0005829];discoidal high-density lipoprotein particle [GO:0034365];endocytic vesicle [GO:0030139];extracellular region [GO:0005576];extracellular space [GO:0005615];high-density lipoprotein particle [GO:0034364];intermediate-density lipoprotein particle [GO:0034363];low-density lipoprotein particle [GO:0034362];nucleus [GO:0005…	GO:0001540;GO:0001932;GO:0001935;GO:0002719;GO:0005102;GO:0005319;GO:0005543;GO:0005576;GO:0005615;GO:0005634;GO:0005829;GO:0006644;GO:0006656;GO:0006695;GO:0007186;GO:0007229;GO:0008035;GO:0008203;GO:0008211;GO:0008289;GO:0009986;GO:0010804;GO:0010875;GO:0010903;GO:0015485;GO:0015914;GO:0018158;GO:0018206;GO:0019899;GO:0019915;GO:0030139;GO:0030300;GO:0030301;GO:0030325;GO:0031072;GO:0031100;GO:…
0.0797358	0.277184	-0.093771	0.124973	-0.0623951	0.0609703	0.203013	-0.332239	0.0126743	0.0775356	-0.079113	0.565536	0.0291691	1.56681	0.156563	-0.0514755	0	PseudoU_synth_2	+	4.25971	0.0102286	Q14AI6	Q14AI6	RUSD3_MOUSE	Rpusd3	Mitochondrial mRNA pseudouridine synthase Rpusd3	3fb_3cb;3fb_3ia;3fb_3ga;3fb_3db;3fb_3eb;3fb_3ba;3fb_3da;3fb_3bb;3fb_ctrl;3fb_3ea;3fb_3aa;3fb_3fa;3fb_3ca;3fb_3ab;3fb_3ha;3fb_3gb	mRNA processing [GO:0006397];positive regulation of mitochondrial translation [GO:0070131];pseudouridine synthesis [GO:0001522]	mitochondrial matrix [GO:0005759];mitochondrion [GO:0005739];ribonucleoprotein granule [GO:0035770]	pseudouridine synthase activity [GO:0009982];RNA binding [GO:0003723]	mitochondrial matrix [GO:0005759];mitochondrion [GO:0005739];ribonucleoprotein granule [GO:0035770];pseudouridine synthase activity [GO:0009982];RNA binding [GO:0003723];mRNA processing [GO:0006397];positive regulation of mitochondrial translation [GO:0070131];pseudouridine synthesis [GO:0001522]	GO:0001522;GO:0003723;GO:0005739;GO:0005759;GO:0006397;GO:0009982;GO:0035770;GO:0070131	5.4.99.-
0.94794	0.173235	0.413631	0.261095	0.277293	0.231366	0.296764	0.179632	-0.230858	0.113516	0.492593	0.300678	0.380693	0.266983	1.0966	0.481119	0	IIGP	+	4.35515	0.00917647	Q60766	Q60766	IRGM1_MOUSE	Irgm1	Immunity-related GTPase family M protein 1	3aa_3ea;3ha_3ea;3aa_ctrl;3ha_ctrl;3aa_3ab;3ha_3ab;3aa_3eb;3ha_3eb;3aa_3da;3ha_3da;3ha_3db;3ha_3fa;3aa_3cb;3ha_3cb	autophagosome assembly [GO:0000045];autophagosome maturation [GO:0097352];CAMKK-AMPK signaling cascade [GO:0061762];cellular response to interferon-beta [GO:0035458];cellular response to lipopolysaccharide [GO:0071222];cellular response to type II interferon [GO:0071346];cellular response to virus [GO:0098586];defense response [GO:0006952];defense response to bacterium [GO:0042742];defense respon…	autolysosome [GO:0044754];autophagosome [GO:0005776];autophagosome membrane [GO:0000421];cell projection [GO:0042995];cytosol [GO:0005829];endoplasmic reticulum [GO:0005783];endoplasmic reticulum membrane [GO:0005789];Golgi apparatus [GO:0005794];Golgi membrane [GO:0000139];late endosome [GO:0005770];late endosome membrane [GO:0031902];lysosomal membrane [GO:0005765];lysosome [GO:0005764];mitocho…	BH3 domain binding [GO:0051434];CARD domain binding [GO:0050700];cardiolipin binding [GO:1901612];GTP binding [GO:0005525];GTPase activity [GO:0003924];phosphatidylinositol-3,4,5-trisphosphate binding [GO:0005547];phosphatidylinositol-3,4-bisphosphate binding [GO:0043325];protein kinase binding [GO:0019901];protein serine/threonine kinase activator activity [GO:0043539]	autolysosome [GO:0044754];autophagosome [GO:0005776];autophagosome membrane [GO:0000421];cell projection [GO:0042995];cytosol [GO:0005829];endoplasmic reticulum [GO:0005783];endoplasmic reticulum membrane [GO:0005789];Golgi apparatus [GO:0005794];Golgi membrane [GO:0000139];late endosome [GO:0005770];late endosome membrane [GO:0031902];lysosomal membrane [GO:0005765];lysosome [GO:0005764];mitocho…	GO:0000045;GO:0000139;GO:0000421;GO:0001891;GO:0001934;GO:0003924;GO:0005525;GO:0005547;GO:0005739;GO:0005764;GO:0005765;GO:0005770;GO:0005776;GO:0005783;GO:0005789;GO:0005794;GO:0005829;GO:0006952;GO:0009617;GO:0010508;GO:0010800;GO:0019901;GO:0030670;GO:0031648;GO:0031902;GO:0031966;GO:0032480;GO:0032689;GO:0033138;GO:0035458;GO:0042742;GO:0042995;GO:0043032;GO:0043254;GO:0043325;GO:0043539;GO:…	3.6.5.-
2.08122	0.199365	1.00756	0.393637	-0.194954	0.287256	-0.00648594	0.266326	-0.386778	0.497572	0.12139	-0.063179	0.00748253	0.00806332	0.262272	0.470545	0	CD36	+	7.86482	0	Q61009	Q61009	SCRB1_MOUSE	Scarb1	Scavenger receptor class B member 1	3fa_3ea;3ga_3ea;3bb_3ea;3cb_3ea;3ha_3ea;3ab_3ea;3eb_3ea;3ia_3ea;3ba_3ea;3aa_3ea;3aa_3ca;3aa_3da;3aa_3gb;3aa_3fb;3aa_3db;3aa_ctrl;3aa_3fa;3aa_3ga;3aa_3bb;3aa_3cb;3aa_3ha;3aa_3ab;3aa_3eb;3aa_3ia	adhesion of symbiont to host [GO:0044406];androgen biosynthetic process [GO:0006702];blood vessel endothelial cell migration [GO:0043534];carotenoid transport [GO:0046867];cholesterol catabolic process [GO:0006707];cholesterol efflux [GO:0033344];cholesterol homeostasis [GO:0042632];cholesterol import [GO:0070508];cholesterol transport [GO:0030301];detection of lipopolysaccharide [GO:0032497];end…	caveola [GO:0005901];cell surface [GO:0009986];cytoplasm [GO:0005737];intracellular membrane-bounded organelle [GO:0043231];lysosome [GO:0005764];membrane [GO:0016020];microvillus membrane [GO:0031528];plasma membrane [GO:0005886]	amyloid-beta binding [GO:0001540];apolipoprotein A-I binding [GO:0034186];apolipoprotein binding [GO:0034185];high-density lipoprotein particle binding [GO:0008035];high-density lipoprotein particle receptor activity [GO:0070506];identical protein binding [GO:0042802];lipid binding [GO:0008289];lipopolysaccharide binding [GO:0001530];lipopolysaccharide immune receptor activity [GO:0001875];low-de…	caveola [GO:0005901];cell surface [GO:0009986];cytoplasm [GO:0005737];intracellular membrane-bounded organelle [GO:0043231];lysosome [GO:0005764];membrane [GO:0016020];microvillus membrane [GO:0031528];plasma membrane [GO:0005886];amyloid-beta binding [GO:0001540];apolipoprotein A-I binding [GO:0034186];apolipoprotein binding [GO:0034185];high-density lipoprotein particle binding [GO:0008035];hig…	GO:0001530;GO:0001540;GO:0001786;GO:0001875;GO:0001935;GO:0005044;GO:0005737;GO:0005764;GO:0005886;GO:0005901;GO:0006702;GO:0006707;GO:0006869;GO:0006910;GO:0008035;GO:0008289;GO:0009986;GO:0010867;GO:0010886;GO:0010899;GO:0015914;GO:0015920;GO:0016020;GO:0030169;GO:0030301;GO:0031528;GO:0032497;GO:0033344;GO:0034185;GO:0034186;GO:0034375;GO:0034381;GO:0034383;GO:0034384;GO:0035461;GO:0042632;GO:…
1.85432	1.57355	1.58188	0.998364	1.66741	-0.0934086	0.800075	1.27358	1.52655	1.49163	1.95838	1.91097	1.87353	1.55484	2.89059	1.80024	0	APOC4	+	3.38293	0.0388132	Q61268	Q61268	APOC4_MOUSE	Apoc4	Apolipoprotein C-IV	3ha_ctrl;3ha_3db;3ha_3ca;3ha_3bb;3ha_3ea;3ha_3cb;3ha_3ba	lipid transport [GO:0006869];positive regulation of sequestering of triglyceride [GO:0010890];triglyceride homeostasis [GO:0070328]	extracellular region [GO:0005576];high-density lipoprotein particle [GO:0034364];very-low-density lipoprotein particle [GO:0034361]		extracellular region [GO:0005576];high-density lipoprotein particle [GO:0034364];very-low-density lipoprotein particle [GO:0034361];lipid transport [GO:0006869];positive regulation of sequestering of triglyceride [GO:0010890];triglyceride homeostasis [GO:0070328]	GO:0005576;GO:0006869;GO:0010890;GO:0034361;GO:0034364;GO:0070328
0.0959606	0.541591	0.264896	1.00944	-0.00306702	-0.27429	0.0570736	-0.507292	0.0732098	-0.0244036	-0.0108528	-0.272884	-0.101522	-0.619715	-0.0208931	-0.0985565	0		+	14.1451	0	Q61578	Q61578	ADRO_MOUSE	Fdxr	NADPH:adrenodoxin oxidoreductase, mitochondrial	3ga_3fb;3ha_3fb;3eb_3fb;ctrl_3fb;3da_3fb;3ca_3fb;3ea_3fb;3aa_3fb;3ba_3fb;3ab_3fb;3bb_3fb;3ca_3cb;3ea_3cb;3aa_3cb;3ba_3cb;3ab_3cb;3bb_3cb;3ab_3db;3bb_3db;3ab_3gb;3bb_3gb;3ab_3ia;3bb_3ia;3ab_3fa;3bb_3fa;3ab_3ga;3bb_3ga;3ab_3ha;3bb_3ha;3ab_3eb;3bb_3eb;3ab_ctrl;3bb_ctrl;3ab_3da;3bb_3da;3ab_3ca;3bb_3ca;3bb_3ea;3bb_3aa;3bb_3ba	cholesterol metabolic process [GO:0008203];NADPH oxidation [GO:0070995];ubiquinone biosynthetic process [GO:0006744]	mitochondrial inner membrane [GO:0005743];mitochondrion [GO:0005739]	NADPH binding [GO:0070402];NADPH-adrenodoxin reductase activity [GO:0015039]	mitochondrial inner membrane [GO:0005743];mitochondrion [GO:0005739];NADPH binding [GO:0070402];NADPH-adrenodoxin reductase activity [GO:0015039];cholesterol metabolic process [GO:0008203];NADPH oxidation [GO:0070995];ubiquinone biosynthetic process [GO:0006744]	GO:0005739;GO:0005743;GO:0006744;GO:0008203;GO:0015039;GO:0070402;GO:0070995	1.18.1.6
0.536695	0.171527	0.397798	0.19533	-0.0389166	-0.495157	0.158748	-0.0634212	-0.0349531	-0.293004	1.52754	1.55673	1.12108	1.36714	0.807809	0.961711	0	Amino_oxidase	+	6.10157	0.001	Q64133	Q64133	AOFA_MOUSE	Maoa	Amine oxidase [flavin-containing] A	3gb_3ea;3fb_3ea;3ga_3ea;3gb_3eb;3fb_3eb;3ga_3eb;3gb_3db;3fb_3db;3ga_3db;3fb_3ca;3ga_3ca;3fb_3cb;3ga_3cb;3fb_3bb;3ga_3bb;3ga_3da;3ga_ctrl	dopamine catabolic process [GO:0042420];neurotransmitter catabolic process [GO:0042135];phenylethylamine metabolic process [GO:0042443];positive regulation of signal transduction [GO:0009967];serotonin metabolic process [GO:0042428]	cytosol [GO:0005829];mitochondrial outer membrane [GO:0005741];mitochondrion [GO:0005739]	aliphatic amine oxidase activity [GO:0052595];flavin adenine dinucleotide binding [GO:0050660];monoamine oxidase activity [GO:0097621];phenethylamine:oxygen oxidoreductase (deaminating) activity [GO:0052596];primary amine oxidase activity [GO:0008131];serotonin binding [GO:0051378]	cytosol [GO:0005829];mitochondrial outer membrane [GO:0005741];mitochondrion [GO:0005739];aliphatic amine oxidase activity [GO:0052595];flavin adenine dinucleotide binding [GO:0050660];monoamine oxidase activity [GO:0097621];phenethylamine:oxygen oxidoreductase (deaminating) activity [GO:0052596];primary amine oxidase activity [GO:0008131];serotonin binding [GO:0051378];dopamine catabolic process…	GO:0005739;GO:0005741;GO:0005829;GO:0008131;GO:0009967;GO:0042135;GO:0042420;GO:0042428;GO:0042443;GO:0050660;GO:0051378;GO:0052595;GO:0052596;GO:0097621	1.4.3.21;1.4.3.4
0.768966	0.692903	1.03395	1.36396	0.711997	0.701226	0.502933	0.609778	-0.0480194	0.071928	0.681087	0.629302	0.251143	0.70576	0.168321	0.453753	0	p450	+	4.8705	0.00464516	Q64464	Q64464	CP3AD_MOUSE	Cyp3a13	Cytochrome P450 3A13	3ba_3ea;3bb_3ea;3ba_ctrl;3bb_ctrl;3ba_3eb;3bb_3eb;3bb_3fa;3bb_3ha	alkaloid catabolic process [GO:0009822];estrogen metabolic process [GO:0008210];lipid hydroxylation [GO:0002933];oxidative demethylation [GO:0070989];positive regulation of gene expression [GO:0010628];retinoic acid metabolic process [GO:0042573];steroid metabolic process [GO:0008202];xenobiotic catabolic process [GO:0042178]	cytoplasm [GO:0005737];endoplasmic reticulum membrane [GO:0005789]	1-alpha,25-dihydroxyvitamin D3 23-hydroxylase activity [GO:0062181];aromatase activity [GO:0070330];caffeine oxidase activity [GO:0034875];enzyme binding [GO:0019899];estrogen 16-alpha-hydroxylase activity [GO:0101020];estrogen 2-hydroxylase activity [GO:0101021];heme binding [GO:0020037];iron ion binding [GO:0005506];monooxygenase activity [GO:0004497];oxidoreductase activity [GO:0016491];retino…	cytoplasm [GO:0005737];endoplasmic reticulum membrane [GO:0005789];1-alpha,25-dihydroxyvitamin D3 23-hydroxylase activity [GO:0062181];aromatase activity [GO:0070330];caffeine oxidase activity [GO:0034875];enzyme binding [GO:0019899];estrogen 16-alpha-hydroxylase activity [GO:0101020];estrogen 2-hydroxylase activity [GO:0101021];heme binding [GO:0020037];iron ion binding [GO:0005506];monooxygenas…	GO:0002933;GO:0004497;GO:0005496;GO:0005506;GO:0005737;GO:0005789;GO:0008202;GO:0008210;GO:0008395;GO:0008401;GO:0009822;GO:0010628;GO:0016491;GO:0019899;GO:0020037;GO:0030343;GO:0034875;GO:0042178;GO:0042573;GO:0050649;GO:0062181;GO:0070330;GO:0070576;GO:0070989;GO:0101020;GO:0101021	1.14.14.1
0.486863	0.136308	0.598306	0.513824	1.88097	0.543366	0.690042	0.708366	-0.126979	0.309126	1.82693	0.799055	1.16954	0.742804	0.335504	0.636205	0	DAO;EF-hand_7	+	7.18839	0.000125	Q64521	Q64521	GPDM_MOUSE	Gpd2	Glycerol-3-phosphate dehydrogenase, mitochondrial	3ca_3ea;3fa_3ea;3ga_3ea;3da_3ea;3ga_ctrl;3da_ctrl;3ga_3eb;3da_3eb;3ga_3ab;3da_3ab;3ga_3ha;3da_3ha;3ga_3db;3da_3db;3ga_3bb;3da_3bb;3ga_3ia;3da_3ia;3da_3aa;3da_3cb;3da_3ba	camera-type eye development [GO:0043010];gluconeogenesis [GO:0006094];glycerol catabolic process [GO:0019563];glycerol-3-phosphate metabolic process [GO:0006072];multicellular organism growth [GO:0035264];NADH metabolic process [GO:0006734]	glycerol-3-phosphate dehydrogenase complex [GO:0009331];mitochondrial inner membrane [GO:0005743];mitochondrion [GO:0005739]	calcium ion binding [GO:0005509];glycerol-3-phosphate dehydrogenase (quinone) activity [GO:0004368];glycerol-3-phosphate dehydrogenase [NAD(P)+] activity [GO:0047952];sn-glycerol-3-phosphate:ubiquinone-8 oxidoreductase activity [GO:0052591]	glycerol-3-phosphate dehydrogenase complex [GO:0009331];mitochondrial inner membrane [GO:0005743];mitochondrion [GO:0005739];calcium ion binding [GO:0005509];glycerol-3-phosphate dehydrogenase (quinone) activity [GO:0004368];glycerol-3-phosphate dehydrogenase [NAD(P)+] activity [GO:0047952];sn-glycerol-3-phosphate:ubiquinone-8 oxidoreductase activity [GO:0052591];camera-type eye development [GO:0…	GO:0004368;GO:0005509;GO:0005739;GO:0005743;GO:0006072;GO:0006094;GO:0006734;GO:0009331;GO:0019563;GO:0035264;GO:0043010;GO:0047952;GO:0052591	1.1.5.3
0.469818	0.850456	0.361841	1.50962	0.264933	0.233083	0.331114	0.46569	0.390602	-0.0400152	1.48674	1.99563	0.312763	0.89724	0.776251	0.694613	0	Flavodoxin_2	+	4.14363	0.0127222	Q64669	Q64669	NQO1_MOUSE	Nqo1	NAD(P)H dehydrogenase [quinone] 1	3gb_3db;3gb_3eb;3gb_ctrl;3gb_3ca;3gb_3da;3gb_3cb;3gb_3ea;3gb_3fa;3gb_3ba;3gb_3ha;3gb_3aa	aging [GO:0007568];cell redox homeostasis [GO:0045454];cellular response to hydrogen peroxide [GO:0070301];cellular response to metal ion [GO:0071248];cellular response to oxidative stress [GO:0034599];innate immune response [GO:0045087];NADH oxidation [GO:0006116];NADPH oxidation [GO:0070995];negative regulation of apoptotic process [GO:0043066];negative regulation of catalytic activity [GO:0043…	cytoplasm [GO:0005737];cytosol [GO:0005829];dendrite [GO:0030425];neuronal cell body [GO:0043025];nucleus [GO:0005634]	identical protein binding [GO:0042802];NAD(P)H dehydrogenase (quinone) activity [GO:0003955];NADH dehydrogenase (quinone) activity [GO:0050136];NADPH dehydrogenase (quinone) activity [GO:0008753];superoxide dismutase activity [GO:0004784]	cytoplasm [GO:0005737];cytosol [GO:0005829];dendrite [GO:0030425];neuronal cell body [GO:0043025];nucleus [GO:0005634];identical protein binding [GO:0042802];NAD(P)H dehydrogenase (quinone) activity [GO:0003955];NADH dehydrogenase (quinone) activity [GO:0050136];NADPH dehydrogenase (quinone) activity [GO:0008753];superoxide dismutase activity [GO:0004784];aging [GO:0007568];cell redox homeostasis…	GO:0000209;GO:0002931;GO:0003955;GO:0004784;GO:0005634;GO:0005737;GO:0005829;GO:0006116;GO:0006743;GO:0006801;GO:0006979;GO:0007568;GO:0007584;GO:0008753;GO:0009410;GO:0009725;GO:0009743;GO:0014075;GO:0019430;GO:0030163;GO:0030425;GO:0032355;GO:0032496;GO:0033574;GO:0034599;GO:0042177;GO:0042360;GO:0042373;GO:0042802;GO:0043025;GO:0043066;GO:0043086;GO:0043279;GO:0043525;GO:0045087;GO:0045454;GO:…	1.6.5.2
0.526038	0.15563	0.498619	0.217842	0.175001	0.499701	0.305269	0.230052	0.14597	0.457264	0.248317	0.15724	0.183673	0.211739	0.826583	0.354763	0	ATG_C;Chorein_N	+	7.51921	0	Q6P4T0	Q6P4T0	ATG2A_MOUSE	Atg2a	Autophagy-related protein 2 homolog A	3aa_ctrl;3ha_ctrl;3ha_3gb;3ha_3fb;3ha_3ea;3ha_3bb;3ha_3da;3ha_3ga;3ha_3fa;3ha_3ab;3ha_3ca;3ha_3cb;3ha_3ia	autophagosome assembly [GO:0000045];autophagy of mitochondrion [GO:0000422];late nucleophagy [GO:0044805];piecemeal microautophagy of the nucleus [GO:0034727];positive regulation of autophagosome assembly [GO:2000786];reticulophagy [GO:0061709]	endoplasmic reticulum membrane [GO:0005789];lipid droplet [GO:0005811];organelle membrane contact site [GO:0044232];phagophore assembly site [GO:0000407];phagophore assembly site membrane [GO:0034045]	lipid transfer activity [GO:0120013];phosphatidylinositol-3-phosphate binding [GO:0032266]	endoplasmic reticulum membrane [GO:0005789];lipid droplet [GO:0005811];organelle membrane contact site [GO:0044232];phagophore assembly site [GO:0000407];phagophore assembly site membrane [GO:0034045];lipid transfer activity [GO:0120013];phosphatidylinositol-3-phosphate binding [GO:0032266];autophagosome assembly [GO:0000045];autophagy of mitochondrion [GO:0000422];late nucleophagy [GO:0044805];p…	GO:0000045;GO:0000407;GO:0000422;GO:0005789;GO:0005811;GO:0032266;GO:0034045;GO:0034727;GO:0044232;GO:0044805;GO:0061709;GO:0120013;GO:2000786
0.157438	0.179251	0.00737	-0.134908	-0.0460491	-0.0272045	-0.171238	-0.0568933	0.144352	-0.742273	0.134477	0.0519047	0.122388	0.174888	0.534803	0.280211	0	PEX11	+	3.56069	0.0287273	Q6P6M5	Q6P6M5	PX11C_MOUSE	Pex11g	Peroxisomal membrane protein 11C	3cb_3eb;3bb_3eb;3gb_3eb;3db_3eb;3da_3eb;3ba_3eb;3ea_3eb;3ab_3eb;3fa_3eb;ctrl_3eb;3ga_3eb;3fb_3eb;3aa_3eb;3ia_3eb;3ha_3eb	peroxisome fission [GO:0016559];regulation of peroxisome size [GO:0044375]	peroxisomal membrane [GO:0005778];peroxisome [GO:0005777];protein-containing complex [GO:0032991]		peroxisomal membrane [GO:0005778];peroxisome [GO:0005777];protein-containing complex [GO:0032991];peroxisome fission [GO:0016559];regulation of peroxisome size [GO:0044375]	GO:0005777;GO:0005778;GO:0016559;GO:0032991;GO:0044375
1.07556	-0.636831	0.514502	-0.188077	-0.555536	0.311186	-0.187071	-0.457119	-0.141794	-0.0543442	0.336439	-0.738645	1.79328	-0.467201	2.17489	-0.558619	0	IPK	+	6.38538	0.00111628	Q6PD10	Q6PD10	IP6K1_MOUSE	Ip6k1	Inositol hexakisphosphate kinase 1	3fa_3gb;3ha_3gb;3fa_3ab;3ha_3ab;3fa_3da;3ha_3da;3fa_3ia;3ha_3ia;3fa_3fb;3ha_3fb;3fa_3ca;3ha_3ca;3fa_3eb;3ha_3eb;3fa_3bb;3ha_3bb;3ha_3ea;3ha_3cb;3ha_ctrl;3ha_3ga	inositol metabolic process [GO:0006020];inositol phosphate biosynthetic process [GO:0032958];negative regulation of cold-induced thermogenesis [GO:0120163];phosphatidylinositol phosphate biosynthetic process [GO:0046854];phosphorylation [GO:0016310]	cytoplasm [GO:0005737];cytosol [GO:0005829];fibrillar center [GO:0001650];nucleoplasm [GO:0005654];nucleus [GO:0005634]	ATP binding [GO:0005524];inositol hexakisphosphate 1-kinase activity [GO:0052723];inositol hexakisphosphate 3-kinase activity [GO:0052724];inositol hexakisphosphate 5-kinase activity [GO:0000832];inositol hexakisphosphate kinase activity [GO:0000828];inositol-1,3,4,5,6-pentakisphosphate kinase activity [GO:0000827]	cytoplasm [GO:0005737];cytosol [GO:0005829];fibrillar center [GO:0001650];nucleoplasm [GO:0005654];nucleus [GO:0005634];ATP binding [GO:0005524];inositol hexakisphosphate 1-kinase activity [GO:0052723];inositol hexakisphosphate 3-kinase activity [GO:0052724];inositol hexakisphosphate 5-kinase activity [GO:0000832];inositol hexakisphosphate kinase activity [GO:0000828];inositol-1,3,4,5,6-pentakisp…	GO:0000827;GO:0000828;GO:0000832;GO:0001650;GO:0005524;GO:0005634;GO:0005654;GO:0005737;GO:0005829;GO:0006020;GO:0016310;GO:0032958;GO:0046854;GO:0052723;GO:0052724;GO:0120163	2.7.4.21
0.346107	-0.176239	0.756351	0.0564938	0.0511808	-0.301516	-0.129236	-0.291063	-0.202383	-0.104245	0.203039	-0.0596905	0.173506	-0.293392	0.428333	0.42684	0	HlyIII	+	5.04889	0.00393103	Q6TCG2	Q6TCG2	PAQR9_MOUSE	Paqr9	Membrane progesterone receptor epsilon	3ba_3eb;3ba_3cb;3ba_3ab;3ba_3db;3ba_3fb;3ba_3ca;3ba_3ea;3ba_ctrl;3ba_3gb;3ba_3bb;3ba_3da		plasma membrane [GO:0005886]	signaling receptor activity [GO:0038023];steroid binding [GO:0005496]	plasma membrane [GO:0005886];signaling receptor activity [GO:0038023];steroid binding [GO:0005496]	GO:0005496;GO:0005886;GO:0038023
1.62901	0.192806	-0.171762	-0.139785	0.391161	-0.547885	0.232104	0.0383654	0.0669613	-0.0128584	0.709705	0.516109	0.472052	0.672411	0.367022	-0.0590305	0	VKOR	+	3.95214	0.0160519	Q6TEK5	Q6TEK5	VKORL_MOUSE	Vkorc1l1	Vitamin K epoxide reductase complex subunit 1-like protein 1	3aa_3bb;3aa_3db;3aa_ctrl;3aa_3ab;3aa_3ia;3aa_3ca;3aa_3ba;3aa_3cb;3aa_3ea;3aa_3eb;3aa_3gb;3aa_3da	cellular response to oxidative stress [GO:0034599];peptidyl-glutamic acid carboxylation [GO:0017187];vitamin K metabolic process [GO:0042373]	endoplasmic reticulum [GO:0005783];endoplasmic reticulum membrane [GO:0005789]	quinone binding [GO:0048038];vitamin-K-epoxide reductase (warfarin-sensitive) activity [GO:0047057]	endoplasmic reticulum [GO:0005783];endoplasmic reticulum membrane [GO:0005789];quinone binding [GO:0048038];vitamin-K-epoxide reductase (warfarin-sensitive) activity [GO:0047057];cellular response to oxidative stress [GO:0034599];peptidyl-glutamic acid carboxylation [GO:0017187];vitamin K metabolic process [GO:0042373]	GO:0005783;GO:0005789;GO:0017187;GO:0034599;GO:0042373;GO:0047057;GO:0048038	1.17.4.4
0.0537376	-0.111702	0.00283623	-0.105442	-0.272079	0.0324268	-0.238762	0.0361176	-0.303556	-0.0372953	-0.0105162	0.126472	0.124043	0.32185	0.589281	0.00437355	0	Tubulin;Tubulin_C	+	5.46334	0.00226415	Q7TMM9	Q7TMM9;Q9CWF2	TBB2A_MOUSE	Tubb2a	Tubulin beta-2A chain	3db_3ea;3gb_3ea;3fa_3ea;3fb_3ea;3ha_3ea;3fb_3da;3ha_3da;3ha_3ca;3ha_3eb;3ha_3ab;3ha_3bb;3ha_3ga;3ha_ctrl;3ha_3cb	cerebral cortex development [GO:0021987];microtubule cytoskeleton organization [GO:0000226];mitotic cell cycle [GO:0000278]	cytoplasm [GO:0005737];intercellular bridge [GO:0045171];microtubule [GO:0005874];microtubule cytoskeleton [GO:0015630];mitotic spindle [GO:0072686]	GTP binding [GO:0005525];GTPase activity [GO:0003924];metal ion binding [GO:0046872];structural constituent of cytoskeleton [GO:0005200]	cytoplasm [GO:0005737];intercellular bridge [GO:0045171];microtubule [GO:0005874];microtubule cytoskeleton [GO:0015630];mitotic spindle [GO:0072686];GTP binding [GO:0005525];GTPase activity [GO:0003924];metal ion binding [GO:0046872];structural constituent of cytoskeleton [GO:0005200];cerebral cortex development [GO:0021987];microtubule cytoskeleton organization [GO:0000226];mitotic cell cycle [G…	GO:0000226;GO:0000278;GO:0003924;GO:0005200;GO:0005525;GO:0005737;GO:0005874;GO:0015630;GO:0021987;GO:0045171;GO:0046872;GO:0072686
1.75114	1.55695	0.785026	1.7044	0.0249901	0.387341	0.197991	0.565187	0.322273	0.570586	1.21681	0.98698	0.285137	1.15266	-0.141921	0.0576525	0	Glutaredoxin	+	6.8105	0.000307692	Q80Y14	Q80Y14	GLRX5_MOUSE	Glrx5	Glutaredoxin-related protein 5, mitochondrial	3bb_ctrl;3ab_ctrl;3aa_ctrl;3bb_3ha;3ab_3ha;3aa_3ha;3bb_3fa;3ab_3fa;3aa_3fa;3bb_3da;3ab_3da;3aa_3da;3bb_3ia;3ab_3ia;3aa_3ia;3bb_3ca;3ab_3ca;3aa_3ca;3bb_3ea;3ab_3ea;3aa_3ea;3aa_3db	[2Fe-2S] cluster assembly [GO:0044571];hemopoiesis [GO:0030097];protein maturation by [2Fe-2S] cluster transfer [GO:0106034];protein maturation by [4Fe-4S] cluster transfer [GO:0106035]	dendrite [GO:0030425];iron-sulfur cluster assembly complex [GO:1990229];mitochondrial matrix [GO:0005759];mitochondrion [GO:0005739];neuronal cell body [GO:0043025];nucleus [GO:0005634]	2 iron, 2 sulfur cluster binding [GO:0051537];metal ion binding [GO:0046872]	dendrite [GO:0030425];iron-sulfur cluster assembly complex [GO:1990229];mitochondrial matrix [GO:0005759];mitochondrion [GO:0005739];neuronal cell body [GO:0043025];nucleus [GO:0005634];2 iron, 2 sulfur cluster binding [GO:0051537];metal ion binding [GO:0046872];[2Fe-2S] cluster assembly [GO:0044571];hemopoiesis [GO:0030097];protein maturation by [2Fe-2S] cluster transfer [GO:0106034];protein mat…	GO:0005634;GO:0005739;GO:0005759;GO:0030097;GO:0030425;GO:0043025;GO:0044571;GO:0046872;GO:0051537;GO:0106034;GO:0106035;GO:1990229
0.233425	0.0736732	0.154364	0.0890541	0.181263	0.0671577	0.152018	0.175934	0.0818901	0.141983	0.281876	0.163322	0.550323	0.531359	1.62343	0.849518	0	Aldedh	+	10.7389	0	Q8BH00	Q8BH00	AL8A1_MOUSE	Aldh8a1	2-aminomuconic semialdehyde dehydrogenase	3ia_ctrl;3ha_ctrl;3ia_3bb;3ha_3bb;3ia_3ab;3ha_3ab;3ia_3db;3ha_3db;3ia_3ea;3ha_3ea;3ia_3eb;3ha_3eb;3ia_3ca;3ha_3ca;3ha_3ba;3ha_3gb;3ha_3cb;3ha_3da;3ha_3aa;3ha_3ga;3ha_3fa;3ha_3fb;3ha_3ia	9-cis-retinoic acid biosynthetic process [GO:0042904];L-kynurenine catabolic process [GO:0097053];retinal metabolic process [GO:0042574];retinoic acid metabolic process [GO:0042573]	cytoplasm [GO:0005737]	aminomuconate-semialdehyde dehydrogenase activity [GO:0047102];retinal dehydrogenase activity [GO:0001758]	cytoplasm [GO:0005737];aminomuconate-semialdehyde dehydrogenase activity [GO:0047102];retinal dehydrogenase activity [GO:0001758];9-cis-retinoic acid biosynthetic process [GO:0042904];L-kynurenine catabolic process [GO:0097053];retinal metabolic process [GO:0042574];retinoic acid metabolic process [GO:0042573]	GO:0001758;GO:0005737;GO:0042573;GO:0042574;GO:0042904;GO:0047102;GO:0097053	1.2.1.32
0.266155	0.0359421	0.136694	0.170864	0.0989227	0.0864372	0.035284	-0.075139	0.113104	0.195274	0.136915	0.0254383	0.594522	0.0813961	0.996893	0.0824986	0	GMC_oxred_C;GMC_oxred_N	+	7.02306	0.000235294	Q8BJ64	Q8BJ64	CHDH_MOUSE	Chdh	Choline dehydrogenase, mitochondrial	3ha_3gb;3ha_3cb;3ha_3da;3ha_3ab;3ha_ctrl;3ha_3ea;3ha_3ca;3ha_3db;3ha_3bb;3ha_3fb;3ha_3ga;3ha_3eb;3ha_3ia;3ha_3ba;3ha_3aa;3ha_3fa	glycine betaine biosynthetic process from choline [GO:0019285]	mitochondrial inner membrane [GO:0005743];mitochondrion [GO:0005739]	choline dehydrogenase activity [GO:0008812];flavin adenine dinucleotide binding [GO:0050660]	mitochondrial inner membrane [GO:0005743];mitochondrion [GO:0005739];choline dehydrogenase activity [GO:0008812];flavin adenine dinucleotide binding [GO:0050660];glycine betaine biosynthetic process from choline [GO:0019285]	GO:0005739;GO:0005743;GO:0008812;GO:0019285;GO:0050660	1.1.99.1
-0.000372887	0.0254517	0.565306	0.162005	-0.0416393	-0.0970879	-0.0870209	0.0669336	-0.0550404	0.0355349	-0.00200653	0.151115	0.0113001	0.250435	0.299355	-0.131144	0	His_Phos_2	+	4.05564	0.0140541	Q8BP40	Q8BP40	PPA6_MOUSE	Acp6	Lysophosphatidic acid phosphatase type 6	3ba_3fa;3ba_3db;3ba_3ia;3ba_3ca;3ba_3ga;3ba_3ea;3ba_3aa;3ba_3da;3ba_ctrl;3ba_3ab;3ba_3eb;3ba_3cb;3ba_3gb	dephosphorylation [GO:0016311];hematopoietic progenitor cell differentiation [GO:0002244];lysobisphosphatidic acid metabolic process [GO:2001311];phospholipid metabolic process [GO:0006644]	cytoplasm [GO:0005737];mitochondrion [GO:0005739]	acid phosphatase activity [GO:0003993];lysophosphatidic acid phosphatase activity [GO:0052642]	cytoplasm [GO:0005737];mitochondrion [GO:0005739];acid phosphatase activity [GO:0003993];lysophosphatidic acid phosphatase activity [GO:0052642];dephosphorylation [GO:0016311];hematopoietic progenitor cell differentiation [GO:0002244];lysobisphosphatidic acid metabolic process [GO:2001311];phospholipid metabolic process [GO:0006644]	GO:0002244;GO:0003993;GO:0005737;GO:0005739;GO:0006644;GO:0016311;GO:0052642;GO:2001311	3.1.3.2
0.860109	-0.206691	0.556952	0.258899	-0.225437	0.154512	0.573518	0.374844	-0.0721369	-0.232861	0.651045	-0.263835	0.451068	0.00838852	1.24583	0.926864	0	adh_short	+	3.47887	0.0321333	Q8BTX9	Q8BTX9	HSDL1_MOUSE	Hsdl1	Inactive hydroxysteroid dehydrogenase-like protein 1	3ha_3eb;3ha_3gb		intermediate filament cytoskeleton [GO:0045111];intracellular membrane-bounded organelle [GO:0043231];mitochondrion [GO:0005739]		intermediate filament cytoskeleton [GO:0045111];intracellular membrane-bounded organelle [GO:0043231];mitochondrion [GO:0005739]	GO:0005739;GO:0043231;GO:0045111
0.0897341	-0.111057	0.108904	-0.00789738	-0.0546131	0.115612	0.0925636	0.195783	-0.327282	0.045804	0.370932	0.0566025	0.458781	0.333657	1.21463	0.321499	0	GST_C_3;GST_N_3	+	7.30754	0	Q8BWM0	Q8BWM0	PGES2_MOUSE	Ptges2	Prostaglandin E synthase 2	3fb_3ea;3fa_3ea;3ha_3ea;3ha_3ab;3ha_3da;3ha_ctrl;3ha_3eb;3ha_3bb;3ha_3ca;3ha_3aa;3ha_3gb;3ha_3ba;3ha_3db;3ha_3cb;3ha_3ga;3ha_3ia;3ha_3fb;3ha_3fa	lipid metabolic process [GO:0006629];positive regulation of DNA-templated transcription [GO:0045893];prostaglandin biosynthetic process [GO:0001516];secretion [GO:0046903]	cytosol [GO:0005829];Golgi membrane [GO:0000139];mitochondrion [GO:0005739];nucleus [GO:0005634]	12-hydroxyheptadecatrienoic acid synthase activity [GO:0036134];DNA binding [GO:0003677];glutathione binding [GO:0043295];heme binding [GO:0020037];lyase activity [GO:0016829];prostaglandin-E synthase activity [GO:0050220]	cytosol [GO:0005829];Golgi membrane [GO:0000139];mitochondrion [GO:0005739];nucleus [GO:0005634];12-hydroxyheptadecatrienoic acid synthase activity [GO:0036134];DNA binding [GO:0003677];glutathione binding [GO:0043295];heme binding [GO:0020037];lyase activity [GO:0016829];prostaglandin-E synthase activity [GO:0050220];lipid metabolic process [GO:0006629];positive regulation of DNA-templated trans…	GO:0000139;GO:0001516;GO:0003677;GO:0005634;GO:0005739;GO:0005829;GO:0006629;GO:0016829;GO:0020037;GO:0036134;GO:0043295;GO:0045893;GO:0046903;GO:0050220	5.3.99.3
2.39746	2.38812	1.74251	2.38012	1.94575	2.3111	1.01733	1.48992	1.03671	0.177821	1.75783	2.52141	1.58553	2.43761	0.153869	0.765483	0	BolA	+	15.0128	0	Q8CEI1	Q8CEI1	BOLA3_MOUSE	Bola3	BolA-like protein 3	3cb_ctrl;3fa_ctrl;3ba_ctrl;3da_ctrl;3ga_ctrl;3db_ctrl;3aa_ctrl;3ab_ctrl;3bb_ctrl;3gb_ctrl;3fb_ctrl;3ba_3eb;3da_3eb;3ga_3eb;3db_3eb;3aa_3eb;3ab_3eb;3bb_3eb;3gb_3eb;3fb_3eb;3fa_3ha;3ba_3ha;3da_3ha;3ga_3ha;3db_3ha;3aa_3ha;3ab_3ha;3bb_3ha;3gb_3ha;3fb_3ha;3da_3ia;3ga_3ia;3db_3ia;3aa_3ia;3ab_3ia;3bb_3ia;3gb_3ia;3fb_3ia;3aa_3ca;3ab_3ca;3bb_3ca;3gb_3ca;3fb_3ca;3ab_3ea;3bb_3ea;3gb_3ea;3fb_3ea	protein maturation by [4Fe-4S] cluster transfer [GO:0106035]	cytosol [GO:0005829];iron-sulfur cluster assembly complex [GO:1990229];mitochondrial matrix [GO:0005759];mitochondrion [GO:0005739];nuclear body [GO:0016604]		cytosol [GO:0005829];iron-sulfur cluster assembly complex [GO:1990229];mitochondrial matrix [GO:0005759];mitochondrion [GO:0005739];nuclear body [GO:0016604];protein maturation by [4Fe-4S] cluster transfer [GO:0106035]	GO:0005739;GO:0005759;GO:0005829;GO:0016604;GO:0106035;GO:1990229
0.339956	0.21908	0.382931	0.446465	0.348892	0.254107	0.513931	0.828325	0.0529575	0.171293	0.393766	0.386517	0.2864	1.22765	0.321095	0.332397	0	p450	+	6.64193	0.000585366	Q8CIM7	Q8CIM7	CP2DQ_MOUSE	Cyp2d26	Cytochrome P450 2D26	3cb_3ea;3fb_3ea;3cb_ctrl;3fb_ctrl;3fb_3eb;3fb_3fa;3fb_3ab;3fb_3db;3fb_3da;3fb_3aa;3fb_3ha;3fb_3gb;3fb_3ga;3fb_3ia;3fb_3ba;3fb_3bb;3fb_3ca	arachidonic acid metabolic process [GO:0019369];response to xenobiotic stimulus [GO:0009410];xenobiotic metabolic process [GO:0006805]	cytoplasm [GO:0005737];endoplasmic reticulum membrane [GO:0005789];intracellular membrane-bounded organelle [GO:0043231];mitochondrion [GO:0005739]	anandamide 11,12 epoxidase activity [GO:0062188];anandamide 14,15 epoxidase activity [GO:0062189];anandamide 8,9 epoxidase activity [GO:0062187];aromatase activity [GO:0070330];heme binding [GO:0020037];iron ion binding [GO:0005506];monooxygenase activity [GO:0004497];oxidoreductase activity [GO:0016491];oxidoreductase activity, acting on paired donors, with incorporation or reduction of molecula…	cytoplasm [GO:0005737];endoplasmic reticulum membrane [GO:0005789];intracellular membrane-bounded organelle [GO:0043231];mitochondrion [GO:0005739];anandamide 11,12 epoxidase activity [GO:0062188];anandamide 14,15 epoxidase activity [GO:0062189];anandamide 8,9 epoxidase activity [GO:0062187];aromatase activity [GO:0070330];heme binding [GO:0020037];iron ion binding [GO:0005506];monooxygenase acti…	GO:0004497;GO:0005506;GO:0005737;GO:0005739;GO:0005789;GO:0006805;GO:0009410;GO:0016491;GO:0016712;GO:0019369;GO:0020037;GO:0043231;GO:0062187;GO:0062188;GO:0062189;GO:0070330	1.14.14.1
-0.13926	0.0833988	-0.0205564	-0.014883	-0.145387	0.0642529	-0.275291	-0.16474	-0.155412	-0.00320053	-0.0540075	0.0254354	-0.162455	0.526542	-0.044816	-0.111448	0	DUF619	+	8.44805	0	Q8R4H7	Q8R4H7	NAGS_MOUSE	Nags	N-acetylglutamate synthase, mitochondrial	3ab_3ca;3fb_3ca;3fb_3da;3fb_3ea;3fb_3fa;3fb_3aa;3fb_3ga;3fb_3cb;3fb_3ia;3fb_3eb;3fb_3ba;3fb_3gb;3fb_3bb;3fb_3ha;3fb_ctrl;3fb_3db;3fb_3ab	arginine biosynthetic process [GO:0006526];glutamate metabolic process [GO:0006536];urea cycle [GO:0000050]	mitochondrial matrix [GO:0005759];mitochondrion [GO:0005739]	acetyl-CoA:L-glutamate N-acetyltransferase activity [GO:0004042];methione N-acyltransferase activity [GO:0103045]	mitochondrial matrix [GO:0005759];mitochondrion [GO:0005739];acetyl-CoA:L-glutamate N-acetyltransferase activity [GO:0004042];methione N-acyltransferase activity [GO:0103045];arginine biosynthetic process [GO:0006526];glutamate metabolic process [GO:0006536];urea cycle [GO:0000050]	GO:0000050;GO:0004042;GO:0005739;GO:0005759;GO:0006526;GO:0006536;GO:0103045	2.3.1.1
0.392172	0.144483	0.0837841	0.115786	0.0608006	-0.116306	0.0329762	0.21687	-1.20447	0.0895329	0.737762	-0.0906172	0.113898	-2.28013	0.183228	0.733755	0	PRA1	+	4.37887	0.00919403	Q8R5J9	Q8R5J9	PRAF3_MOUSE	Arl6ip5	PRA1 family protein 3	3cb_3fb;3eb_3fb;3bb_3fb;3ab_3fb;3da_3fb;3ha_3fb;3aa_3fb;3ia_3fb;3ga_3fb;3ga_3ea	cellular response to organic cyclic compound [GO:0071407];glutathione metabolic process [GO:0006749];intrinsic apoptotic signaling pathway in response to oxidative stress [GO:0008631];L-glutamate import across plasma membrane [GO:0098712];L-glutamate transmembrane transport [GO:0015813];learning or memory [GO:0007611];negative regulation of L-glutamate import across plasma membrane [GO:0002037];n…	cytoplasm [GO:0005737];cytoskeleton [GO:0005856];endoplasmic reticulum membrane [GO:0005789];membrane [GO:0016020];plasma membrane [GO:0005886];presynaptic cytosol [GO:0099523]	transmembrane transporter binding [GO:0044325]	cytoplasm [GO:0005737];cytoskeleton [GO:0005856];endoplasmic reticulum membrane [GO:0005789];membrane [GO:0016020];plasma membrane [GO:0005886];presynaptic cytosol [GO:0099523];transmembrane transporter binding [GO:0044325];cellular response to organic cyclic compound [GO:0071407];glutathione metabolic process [GO:0006749];intrinsic apoptotic signaling pathway in response to oxidative stress [GO:…	GO:0002037;GO:0005737;GO:0005789;GO:0005856;GO:0005886;GO:0006749;GO:0007611;GO:0008631;GO:0010917;GO:0015031;GO:0015813;GO:0016020;GO:0032874;GO:0036475;GO:0043065;GO:0043280;GO:0044325;GO:0051051;GO:0051580;GO:0071407;GO:0072659;GO:0098712;GO:0099523
0.678668	1.35033	0.825224	0.92404	-0.206578	-0.0453901	-0.63191	-0.0110683	-0.0875988	0.24748	0.0445213	0.373852	-0.0271683	0.207605	-0.916805	0.214268	0		+	3.79405	0.0203457	Q8VC10	Q8VC10	OSGI1_MOUSE	Osgin1	Oxidative stress-induced growth inhibitor 1	3bb_3ha;3ab_3ha;3bb_3ca;3ab_3ca;3ab_ctrl;3ab_3ga;3ab_3db	cell differentiation [GO:0030154];negative regulation of cell growth [GO:0030308];regulation of apoptotic process [GO:0042981];regulation of cell migration [GO:0030334];regulation of cell population proliferation [GO:0042127]		growth factor activity [GO:0008083]	growth factor activity [GO:0008083];cell differentiation [GO:0030154];negative regulation of cell growth [GO:0030308];regulation of apoptotic process [GO:0042981];regulation of cell migration [GO:0030334];regulation of cell population proliferation [GO:0042127]	GO:0008083;GO:0030154;GO:0030308;GO:0030334;GO:0042127;GO:0042981
0.290123	-0.0350676	0.0155811	-0.114247	-0.0568409	-0.0758562	-0.115519	-0.0532827	0.00139904	-0.0979919	0.0595112	-0.0311241	0.019556	-0.0460281	0.436239	0.0341644	0	ADH_zinc_N	+	3.8031	0.0201	Q8VDQ1	Q8VDQ1	PTGR2_MOUSE	Ptgr2	Prostaglandin reductase 2	3ha_3eb;3ha_3bb;3ha_3cb;3ha_3ca;3ha_3fb;3ha_ctrl;3ha_3db;3ha_3fa;3ha_3ba;3ha_3da;3ha_3ia;3ha_3ea;3ha_3ab;3ha_3ga	prostaglandin metabolic process [GO:0006693]	cytosol [GO:0005829];mitochondrion [GO:0005739]	13-prostaglandin reductase activity [GO:0036132];15-oxoprostaglandin 13-oxidase activity [GO:0047522]	cytosol [GO:0005829];mitochondrion [GO:0005739];13-prostaglandin reductase activity [GO:0036132];15-oxoprostaglandin 13-oxidase activity [GO:0047522];prostaglandin metabolic process [GO:0006693]	GO:0005739;GO:0005829;GO:0006693;GO:0036132;GO:0047522	1.3.1.48
0.092639	0.276623	0.0806389	0.510056	-0.0146532	0.580427	0.285236	0.350648	0.178982	0.0696554	0.133983	0.79727	-0.0455303	0.591705	0.170683	-0.0362463	0	NAD_binding_1	+	6.25985	0.00109091	Q8VE38	Q8VE38	OXND1_MOUSE	Oxnad1	Oxidoreductase NAD-binding domain-containing protein 1	3fb_3eb;3gb_3eb;3db_3ia;3fb_3ia;3gb_3ia;3db_3da;3fb_3da;3gb_3da;3db_ctrl;3fb_ctrl;3gb_ctrl;3db_3fa;3fb_3fa;3gb_3fa;3db_3ba;3fb_3ba;3gb_3ba;3fb_3aa;3gb_3aa;3fb_3ga;3gb_3ga		mitochondrion [GO:0005739]	oxidoreductase activity [GO:0016491]	mitochondrion [GO:0005739];oxidoreductase activity [GO:0016491]	GO:0005739;GO:0016491	1.-.-.-
0.885908	1.3414	0.8612	1.87508	1.3089	1.43753	0.880645	0.87048	0.77663	-0.772104	0.622738	1.08548	0.208451	1.50527	-0.410202	-0.64692	0	CIAPIN1	+	4.87771	0.00465574	Q8WTY4	Q8WTY4	CPIN1_MOUSE	Ciapin1	Anamorsin	3db_3eb;3ab_3eb;3fb_3eb;3bb_3eb;3ab_3ia;3fb_3ia;3bb_3ia;3fb_3ha;3bb_3ha	apoptotic process [GO:0006915];hemopoiesis [GO:0030097];iron-sulfur cluster assembly [GO:0016226];negative regulation of apoptotic process [GO:0043066];sequestering of metal ion [GO:0051238]	cytoplasm [GO:0005737];mitochondrial intermembrane space [GO:0005758];mitochondrion [GO:0005739];nucleolus [GO:0005730];nucleoplasm [GO:0005654]	2 iron, 2 sulfur cluster binding [GO:0051537];4 iron, 4 sulfur cluster binding [GO:0051539];electron transfer activity [GO:0009055];metal ion binding [GO:0046872];methyltransferase activity [GO:0008168]	cytoplasm [GO:0005737];mitochondrial intermembrane space [GO:0005758];mitochondrion [GO:0005739];nucleolus [GO:0005730];nucleoplasm [GO:0005654];2 iron, 2 sulfur cluster binding [GO:0051537];4 iron, 4 sulfur cluster binding [GO:0051539];electron transfer activity [GO:0009055];metal ion binding [GO:0046872];methyltransferase activity [GO:0008168];apoptotic process [GO:0006915];hemopoiesis [GO:0030…	GO:0005654;GO:0005730;GO:0005737;GO:0005739;GO:0005758;GO:0006915;GO:0008168;GO:0009055;GO:0016226;GO:0030097;GO:0043066;GO:0046872;GO:0051238;GO:0051537;GO:0051539
-0.0713978	-0.162955	-0.119875	0.0905685	0.0341988	0.0186329	0.0123806	-0.00831699	-0.0924349	-0.056386	-0.0990791	0.260843	-0.180828	0.702875	-0.280551	-0.149092	0	DUF1982;Molybdopterin;NADH-G_4Fe-4S_3	+	3.69384	0.0224471	Q91VD9	Q91VD9	NDUS1_MOUSE	Ndufs1	NADH-ubiquinone oxidoreductase 75 kDa subunit, mitochondrial	3gb_3ha;3fb_3ha;3fb_3fa;3fb_3ia;3fb_3ea;3fb_3ab;3fb_3ba;3fb_3ga;3fb_ctrl;3fb_3aa;3fb_3ca;3fb_3eb	aerobic respiration [GO:0009060];apoptotic mitochondrial changes [GO:0008637];ATP metabolic process [GO:0046034];cellular respiration [GO:0045333];mitochondrial electron transport, NADH to ubiquinone [GO:0006120];mitochondrial respiratory chain complex I assembly [GO:0032981];proton motive force-driven mitochondrial ATP synthesis [GO:0042776];reactive oxygen species metabolic process [GO:0072593]…	mitochondrial inner membrane [GO:0005743];mitochondrial intermembrane space [GO:0005758];mitochondrial respiratory chain complex I [GO:0005747];mitochondrion [GO:0005739];myelin sheath [GO:0043209]	2 iron, 2 sulfur cluster binding [GO:0051537];4 iron, 4 sulfur cluster binding [GO:0051539];electron transfer activity [GO:0009055];metal ion binding [GO:0046872];NADH dehydrogenase (ubiquinone) activity [GO:0008137]	mitochondrial inner membrane [GO:0005743];mitochondrial intermembrane space [GO:0005758];mitochondrial respiratory chain complex I [GO:0005747];mitochondrion [GO:0005739];myelin sheath [GO:0043209];2 iron, 2 sulfur cluster binding [GO:0051537];4 iron, 4 sulfur cluster binding [GO:0051539];electron transfer activity [GO:0009055];metal ion binding [GO:0046872];NADH dehydrogenase (ubiquinone) activi…	GO:0005739;GO:0005743;GO:0005747;GO:0005758;GO:0006120;GO:0008137;GO:0008637;GO:0009055;GO:0009060;GO:0032981;GO:0042776;GO:0043209;GO:0045333;GO:0046034;GO:0046872;GO:0051537;GO:0051539;GO:0051881;GO:0072593	7.1.1.2
-0.0957575	-0.238119	-0.219233	-0.1273	0.484528	-0.0647736	-0.0135612	-0.00830555	-0.178106	-0.240556	0.020318	-0.0889854	-0.126773	-0.108863	-0.198238	-0.0706263	0	Complex1_49kDa	+	3.7529	0.0213659	Q91WD5	Q91WD5	NDUS2_MOUSE	Ndufs2	NADH dehydrogenase [ubiquinone] iron-sulfur protein 2, mitochondrial	3da_3ha;3da_3fa;3da_3ba;3da_3ea;3da_3ab;3da_3fb;3da_3db;3da_3bb;3da_3gb;3da_3eb;3da_3ca;3da_3aa;3da_3cb;3da_3ia	aerobic respiration [GO:0009060];cellular response to oxygen levels [GO:0071453];gliogenesis [GO:0042063];mitochondrial ATP synthesis coupled electron transport [GO:0042775];mitochondrial electron transport, NADH to ubiquinone [GO:0006120];mitochondrial respiratory chain complex I assembly [GO:0032981];neural precursor cell proliferation [GO:0061351];neurogenesis [GO:0022008];proton motive force-…	mitochondrial inner membrane [GO:0005743];mitochondrial respiratory chain complex I [GO:0005747];mitochondrion [GO:0005739];nucleoplasm [GO:0005654]	4 iron, 4 sulfur cluster binding [GO:0051539];metal ion binding [GO:0046872];NAD binding [GO:0051287];NADH dehydrogenase (ubiquinone) activity [GO:0008137];NADH dehydrogenase activity [GO:0003954];oxygen sensor activity [GO:0019826];quinone binding [GO:0048038];ubiquitin protein ligase binding [GO:0031625]	mitochondrial inner membrane [GO:0005743];mitochondrial respiratory chain complex I [GO:0005747];mitochondrion [GO:0005739];nucleoplasm [GO:0005654];4 iron, 4 sulfur cluster binding [GO:0051539];metal ion binding [GO:0046872];NAD binding [GO:0051287];NADH dehydrogenase (ubiquinone) activity [GO:0008137];NADH dehydrogenase activity [GO:0003954];oxygen sensor activity [GO:0019826];quinone binding […	GO:0003954;GO:0005654;GO:0005739;GO:0005743;GO:0005747;GO:0006120;GO:0006979;GO:0008137;GO:0009060;GO:0019826;GO:0022008;GO:0031625;GO:0032981;GO:0042063;GO:0042775;GO:0042776;GO:0046872;GO:0048038;GO:0051287;GO:0051539;GO:0061351;GO:0071453	7.1.1.2
0.317505	0.721329	0.192698	1.57983	0.384003	0.556175	0.137018	0.592611	0.16202	0.0420227	0.344004	1.53495	0.0478745	1.28881	0.0626144	0.141218	0	MitoNEET_N;zf-CDGSH	+	4.10086	0.0134795	Q91WS0	Q91WS0	CISD1_MOUSE	Cisd1	CDGSH iron-sulfur domain-containing protein 1	3fb_3fa;3bb_3fa;3gb_3fa;3gb_3eb;3bb_3ha;3gb_3ha;3bb_3ea;3gb_3ea	protein maturation by [2Fe-2S] cluster transfer [GO:0106034];regulation of autophagy [GO:0010506];regulation of cellular respiration [GO:0043457]	cytoplasmic side of mitochondrial outer membrane [GO:0032473];mitochondrial outer membrane [GO:0005741];mitochondrion [GO:0005739]	2 iron, 2 sulfur cluster binding [GO:0051537];identical protein binding [GO:0042802];iron ion binding [GO:0005506];L-cysteine transaminase activity [GO:0047801];protein homodimerization activity [GO:0042803];pyridoxal phosphate binding [GO:0030170]	cytoplasmic side of mitochondrial outer membrane [GO:0032473];mitochondrial outer membrane [GO:0005741];mitochondrion [GO:0005739];2 iron, 2 sulfur cluster binding [GO:0051537];identical protein binding [GO:0042802];iron ion binding [GO:0005506];L-cysteine transaminase activity [GO:0047801];protein homodimerization activity [GO:0042803];pyridoxal phosphate binding [GO:0030170];protein maturation …	GO:0005506;GO:0005739;GO:0005741;GO:0010506;GO:0030170;GO:0032473;GO:0042802;GO:0042803;GO:0043457;GO:0047801;GO:0051537;GO:0106034	2.6.1.3
0.0533638	0.012104	-0.00887871	-0.112095	-0.204363	-0.121662	-0.188522	0.00741005	-0.214176	-0.154459	0.335632	0.0838089	-0.257389	-0.138718	-0.0421791	0.570555	0	COesterase	+	4.2878	0.010029	Q91WU0	Q91WU0	EST1F_MOUSE	Ces1f	Carboxylesterase 1F	3ia_3fa;3ia_3da;3ia_3fb;3ia_3eb;3ia_3db;3ia_3ca;3ia_3ea;3ia_3ba;3ia_ctrl;3ia_3ha;3ia_3bb;3ia_3cb;3ia_3ab	cellular response to cholesterol [GO:0071397];cellular response to low-density lipoprotein particle stimulus [GO:0071404];cholesterol biosynthetic process [GO:0006695];cholesterol homeostasis [GO:0042632];cholesterol metabolic process [GO:0008203];epithelial cell differentiation [GO:0030855];lipid catabolic process [GO:0016042];medium-chain fatty acid metabolic process [GO:0051791];negative regul…	cytoplasm [GO:0005737];cytosol [GO:0005829];endoplasmic reticulum [GO:0005783];intracellular membrane-bounded organelle [GO:0043231];lipid droplet [GO:0005811]	all-trans-retinyl-palmitate hydrolase, all-trans-retinol forming activity [GO:0047376];carboxylesterase activity [GO:0106435];carboxylic ester hydrolase activity [GO:0052689];retinyl-palmitate esterase activity [GO:0050253];sterol esterase activity [GO:0004771]	cytoplasm [GO:0005737];cytosol [GO:0005829];endoplasmic reticulum [GO:0005783];intracellular membrane-bounded organelle [GO:0043231];lipid droplet [GO:0005811];all-trans-retinyl-palmitate hydrolase, all-trans-retinol forming activity [GO:0047376];carboxylesterase activity [GO:0106435];carboxylic ester hydrolase activity [GO:0052689];retinyl-palmitate esterase activity [GO:0050253];sterol esterase…	GO:0004771;GO:0005737;GO:0005783;GO:0005811;GO:0005829;GO:0006695;GO:0008203;GO:0010875;GO:0010887;GO:0016042;GO:0019626;GO:0030855;GO:0042632;GO:0043231;GO:0043691;GO:0047376;GO:0050253;GO:0051791;GO:0052689;GO:0070857;GO:0071397;GO:0071404;GO:0090205;GO:0106435;GO:0120188	3.1.1.1
0.0353508	0.344978	0.0443707	0.645241	0.073988	0.447632	-0.0959435	0.383957	-0.0690002	-0.303595	0.163553	0.882448	0.0212727	1.20652	0.28595	-0.233658	0	Hemopexin	+	5.099	0.00350877	Q91X72	Q91X72	HEMO_MOUSE	Hpx	Hemopexin	3gb_3fa;3fb_3fa;3fb_3eb;3fb_3ia;3fb_3da;3fb_3ea;3fb_ctrl;3fb_3ca;3fb_3ba;3fb_3aa;3fb_3ha;3fb_3ga	heme metabolic process [GO:0042168];hemoglobin metabolic process [GO:0020027];intracellular iron ion homeostasis [GO:0006879];positive regulation of humoral immune response mediated by circulating immunoglobulin [GO:0002925];positive regulation of immunoglobulin production [GO:0002639];positive regulation of response to type II interferon [GO:0060332];positive regulation of type II interferon-med…	extracellular space [GO:0005615]	heme binding [GO:0020037];heme transmembrane transporter activity [GO:0015232];metal ion binding [GO:0046872]	extracellular space [GO:0005615];heme binding [GO:0020037];heme transmembrane transporter activity [GO:0015232];metal ion binding [GO:0046872];heme metabolic process [GO:0042168];hemoglobin metabolic process [GO:0020027];intracellular iron ion homeostasis [GO:0006879];positive regulation of humoral immune response mediated by circulating immunoglobulin [GO:0002925];positive regulation of immunogl…	GO:0002639;GO:0002925;GO:0005615;GO:0006879;GO:0007260;GO:0015232;GO:0020027;GO:0020037;GO:0042168;GO:0042531;GO:0046872;GO:0051246;GO:0060332;GO:0060333;GO:0060335
0.53026	0.729671	0.527595	1.49279	0.0751629	-0.019866	-0.0454826	0.0502567	-0.232098	-0.0543613	0.47689	-0.0330324	0.101859	0.108348	0.332152	0.479337	0	DAO	+	12.4562	0	Q91YP0	Q91YP0	L2HDH_MOUSE	L2hgdh	L-2-hydroxyglutarate dehydrogenase, mitochondrial	3ga_3ea;3aa_3ea;3ba_3ea;3ia_3ea;3ab_3ea;3bb_3ea;3ia_3gb;3ab_3gb;3bb_3gb;3ia_3ca;3ab_3ca;3bb_3ca;3ab_3eb;3bb_3eb;3ab_ctrl;3bb_ctrl;3ab_3db;3bb_3db;3ab_3cb;3bb_3cb;3ab_3fa;3bb_3fa;3bb_3da;3bb_3fb;3bb_3ha;3bb_3ga;3bb_3aa;3bb_3ba;3bb_3ia;3bb_3ab	small molecule metabolic process [GO:0044281]	membrane [GO:0016020];mitochondrion [GO:0005739]	2-hydroxyglutarate dehydrogenase activity [GO:0047545]	membrane [GO:0016020];mitochondrion [GO:0005739];2-hydroxyglutarate dehydrogenase activity [GO:0047545];small molecule metabolic process [GO:0044281]	GO:0005739;GO:0016020;GO:0044281;GO:0047545	1.1.99.2
0.0481377	0.2472	-0.0942402	0.6651	0.50415	1.00559	0.77112	1.10617	0.658104	0.161893	0.0714893	1.37139	0.787043	2.37268	0.581095	-0.108931	0	Complex1_51K;NADH_4Fe-4S;SLBB	+	7.81489	0	Q91YT0	Q91YT0	NDUV1_MOUSE	Ndufv1	NADH dehydrogenase [ubiquinone] flavoprotein 1, mitochondrial	3gb_3ia;3fb_3ia;3gb_3ba;3fb_3ba;3gb_ctrl;3fb_ctrl;3fb_3ga;3fb_3eb;3fb_3aa;3fb_3ab;3fb_3da;3fb_3ea;3fb_3ha;3fb_3bb;3fb_3ca;3fb_3fa;3fb_3cb	aerobic respiration [GO:0009060];mitochondrial ATP synthesis coupled electron transport [GO:0042775];mitochondrial electron transport, NADH to ubiquinone [GO:0006120];proton motive force-driven mitochondrial ATP synthesis [GO:0042776]	cytosol [GO:0005829];mitochondrial inner membrane [GO:0005743];mitochondrial respiratory chain complex I [GO:0005747];mitochondrion [GO:0005739]	4 iron, 4 sulfur cluster binding [GO:0051539];FMN binding [GO:0010181];metal ion binding [GO:0046872];NAD binding [GO:0051287];NADH dehydrogenase (ubiquinone) activity [GO:0008137]	cytosol [GO:0005829];mitochondrial inner membrane [GO:0005743];mitochondrial respiratory chain complex I [GO:0005747];mitochondrion [GO:0005739];4 iron, 4 sulfur cluster binding [GO:0051539];FMN binding [GO:0010181];metal ion binding [GO:0046872];NAD binding [GO:0051287];NADH dehydrogenase (ubiquinone) activity [GO:0008137];aerobic respiration [GO:0009060];mitochondrial ATP synthesis coupled elec…	GO:0005739;GO:0005743;GO:0005747;GO:0005829;GO:0006120;GO:0008137;GO:0009060;GO:0010181;GO:0042775;GO:0042776;GO:0046872;GO:0051287;GO:0051539	7.1.1.2
0.417247	0.215254	0.351112	0.34679	0.222881	0.0359716	0.148203	0.280261	0.0332355	0.197815	0.61895	0.299335	0.821814	0.747347	0.759745	0.365767	0	ETF_QO	+	5.30521	0.0025	Q921G7	Q921G7	ETFD_MOUSE	Etfdh	Electron transfer flavoprotein-ubiquinone oxidoreductase, mitochondrial	3fa_3ea;3fb_3ea;3ha_3ea;3fa_ctrl;3fb_ctrl;3ha_ctrl;3fa_3ca;3fb_3ca;3ha_3ca;3fa_3db;3fb_3db;3ha_3db;3fb_3ab;3ha_3ab	electron transport chain [GO:0022900];fatty acid beta-oxidation using acyl-CoA dehydrogenase [GO:0033539];response to oxidative stress [GO:0006979]	membrane [GO:0016020];mitochondrial electron transfer flavoprotein complex [GO:0017133];mitochondrial inner membrane [GO:0005743];mitochondrial membrane [GO:0031966];mitochondrion [GO:0005739]	4 iron, 4 sulfur cluster binding [GO:0051539];electron transfer activity [GO:0009055];electron-transferring-flavoprotein dehydrogenase activity [GO:0004174];iron-sulfur cluster binding [GO:0051536];metal ion binding [GO:0046872];oxidoreductase activity [GO:0016491];quinone binding [GO:0048038];ubiquinone binding [GO:0048039]	membrane [GO:0016020];mitochondrial electron transfer flavoprotein complex [GO:0017133];mitochondrial inner membrane [GO:0005743];mitochondrial membrane [GO:0031966];mitochondrion [GO:0005739];4 iron, 4 sulfur cluster binding [GO:0051539];electron transfer activity [GO:0009055];electron-transferring-flavoprotein dehydrogenase activity [GO:0004174];iron-sulfur cluster binding [GO:0051536];metal io…	GO:0004174;GO:0005739;GO:0005743;GO:0006979;GO:0009055;GO:0016020;GO:0016491;GO:0017133;GO:0022900;GO:0031966;GO:0033539;GO:0046872;GO:0048038;GO:0048039;GO:0051536;GO:0051539	1.5.5.1
0.266648	0.0487423	0.0966187	0.23753	0.348843	0.618046	0.213989	0.746799	-0.0812683	-0.269614	0.981321	1.46251	0.694754	1.46478	0.318184	0.462564	0	F420_oxidored;Ferric_reduct	+	7.87128	0	Q923B6	Q923B6	STEA4_MOUSE	Steap4	Metalloreductase STEAP4	3ga_3eb;3gb_3eb;3fb_3eb;3ga_3ea;3gb_3ea;3fb_3ea;3ga_ctrl;3gb_ctrl;3fb_ctrl;3gb_3ca;3fb_3ca;3gb_3ba;3fb_3ba;3gb_3ab;3fb_3ab;3gb_3bb;3fb_3bb;3gb_3aa;3fb_3aa;3gb_3ia;3fb_3ia;3fb_3ha;3fb_3da	copper ion import [GO:0015677];fat cell differentiation [GO:0045444];iron import into cell [GO:0033212];iron ion import across cell outer membrane [GO:0098706];protein homotrimerization [GO:0070207]	early endosome membrane [GO:0031901];endosome [GO:0005768];Golgi membrane [GO:0000139];membrane [GO:0016020];nucleoplasm [GO:0005654];plasma membrane [GO:0005886]	cupric reductase activity [GO:0008823];electron transfer activity [GO:0009055];FAD binding [GO:0071949];ferric-chelate reductase (NADPH) activity [GO:0052851];heme binding [GO:0020037];metal ion binding [GO:0046872]	early endosome membrane [GO:0031901];endosome [GO:0005768];Golgi membrane [GO:0000139];membrane [GO:0016020];nucleoplasm [GO:0005654];plasma membrane [GO:0005886];cupric reductase activity [GO:0008823];electron transfer activity [GO:0009055];FAD binding [GO:0071949];ferric-chelate reductase (NADPH) activity [GO:0052851];heme binding [GO:0020037];metal ion binding [GO:0046872];copper ion import [G…	GO:0000139;GO:0005654;GO:0005768;GO:0005886;GO:0008823;GO:0009055;GO:0015677;GO:0016020;GO:0020037;GO:0031901;GO:0033212;GO:0045444;GO:0046872;GO:0052851;GO:0070207;GO:0071949;GO:0098706	1.16.1.9
0.10355	0.994176	-0.0656052	0.580088	0.214334	-0.299267	-0.0428648	-0.174688	-0.0209484	-0.0124731	-0.152639	0.699754	0.331065	1.92154	0.433136	0.452898	0	GIDA;GIDA_assoc_3	+	5.52416	0.002	Q923Z3	Q923Z3	MTO1_MOUSE	Mto1	Protein MTO1 homolog, mitochondrial	3fb_3eb;3fb_3ga;3fb_3db;3fb_3cb;3fb_3aa;3fb_ctrl;3fb_3ca;3fb_3ba;3fb_3ea;3fb_3da;3fb_3ha;3fb_3fa;3fb_3ia	mitochondrial tRNA wobble uridine modification [GO:0070899];tRNA methylation [GO:0030488];tRNA wobble uridine modification [GO:0002098]	cytosol [GO:0005829];mitochondrion [GO:0005739]	flavin adenine dinucleotide binding [GO:0050660]	cytosol [GO:0005829];mitochondrion [GO:0005739];flavin adenine dinucleotide binding [GO:0050660];mitochondrial tRNA wobble uridine modification [GO:0070899];tRNA methylation [GO:0030488];tRNA wobble uridine modification [GO:0002098]	GO:0002098;GO:0005739;GO:0005829;GO:0030488;GO:0050660;GO:0070899
-0.0268097	-0.0418606	0.079525	-0.0138092	-0.0334053	0.0263252	0.0669823	-0.0673599	-0.0261745	0.0829277	1.03733	-0.0770912	-0.100603	-0.0457077	-0.0120964	2.77964	0	CRAL_TRIO;CRAL_TRIO_N	+	16.1074	0	Q99J08	Q99J08	S14L2_MOUSE	Sec14l2	SEC14-like protein 2	3ga_3fa;3ia_3fa;3ga_3gb;3ia_3gb;3ga_3da;3ia_3da;3ga_3ab;3ia_3ab;3ga_3bb;3ia_3bb;3ga_3fb;3ia_3fb;3ga_3cb;3ia_3cb;3ga_3ha;3ia_3ha;3ga_3ea;3ia_3ea;3ga_3ca;3ia_3ca;3ga_3aa;3ia_3aa;3ga_ctrl;3ia_ctrl;3ga_3db;3ia_3db;3ga_3ba;3ia_3ba;3ga_3eb;3ia_3eb;3ia_3ga	positive regulation of cholesterol biosynthetic process [GO:0045542]	cytoplasm [GO:0005737];cytosol [GO:0005829];nucleoplasm [GO:0005654]	enzyme activator activity [GO:0008047];lipid binding [GO:0008289];transferase activity, transferring alkyl or aryl (other than methyl) groups [GO:0016765]	cytoplasm [GO:0005737];cytosol [GO:0005829];nucleoplasm [GO:0005654];enzyme activator activity [GO:0008047];lipid binding [GO:0008289];transferase activity, transferring alkyl or aryl (other than methyl) groups [GO:0016765];positive regulation of cholesterol biosynthetic process [GO:0045542]	GO:0005654;GO:0005737;GO:0005829;GO:0008047;GO:0008289;GO:0016765;GO:0045542
0.573816	0.00844669	0.425162	0.154039	0.156803	0.229606	0.0795307	0.251271	0.00887012	0.165943	0.389781	-0.00829887	0.285185	-0.0727377	1.06851	0.371105	0	DER1	+	5.40692	0.00218182	Q99J56	Q99J56	DERL1_MOUSE	Derl1	Derlin-1	3ha_ctrl;3ha_3fb;3ha_3ab;3ha_3bb;3ha_3ca;3ha_3gb;3ha_3eb;3ha_3cb;3ha_3db;3ha_3fa;3ha_3ea;3ha_3da;3ha_3ba	cellular response to unfolded protein [GO:0034620];endoplasmic reticulum unfolded protein response [GO:0030968];ER-associated misfolded protein catabolic process [GO:0071712];ERAD pathway [GO:0036503];positive regulation of protein binding [GO:0032092];positive regulation of protein ubiquitination [GO:0031398];proteasome-mediated ubiquitin-dependent protein catabolic process [GO:0043161];protein …	Derlin-1 retrotranslocation complex [GO:0036513];Derlin-1-VIMP complex [GO:0036502];early endosome [GO:0005769];endoplasmic reticulum [GO:0005783];endoplasmic reticulum membrane [GO:0005789];endoplasmic reticulum quality control compartment [GO:0044322];Hrd1p ubiquitin ligase ERAD-L complex [GO:0000839];late endosome [GO:0005770];membrane [GO:0016020]	ATPase binding [GO:0051117];identical protein binding [GO:0042802];MHC class I protein binding [GO:0042288];misfolded protein binding [GO:0051787];protease binding [GO:0002020];protein-containing complex binding [GO:0044877];signal recognition particle binding [GO:0005047];ubiquitin protein ligase binding [GO:0031625];ubiquitin-specific protease binding [GO:1990381]	Derlin-1 retrotranslocation complex [GO:0036513];Derlin-1-VIMP complex [GO:0036502];early endosome [GO:0005769];endoplasmic reticulum [GO:0005783];endoplasmic reticulum membrane [GO:0005789];endoplasmic reticulum quality control compartment [GO:0044322];Hrd1p ubiquitin ligase ERAD-L complex [GO:0000839];late endosome [GO:0005770];membrane [GO:0016020];ATPase binding [GO:0051117];identical protein…	GO:0000839;GO:0002020;GO:0005047;GO:0005769;GO:0005770;GO:0005783;GO:0005789;GO:0006986;GO:0016020;GO:0030433;GO:0030968;GO:0030970;GO:0031398;GO:0031625;GO:0031648;GO:0032092;GO:0034620;GO:0036502;GO:0036503;GO:0036513;GO:0042288;GO:0042802;GO:0043161;GO:0044322;GO:0044877;GO:0051117;GO:0051787;GO:0071712;GO:1990381
0.407885	0.0779095	0.16176	0.247946	0.261768	0.369628	0.2026	0.30894	0.146523	-0.0148201	2.02771	0.63867	1.26462	0.867186	1.60958	1.11914	0	RPE65	+	6.94146	0.000216216	Q99NF1	Q99NF1	BCDO2_MOUSE	Bco2	Carotenoid-cleaving dioxygenase, mitochondrial	3fa_3ea;3ha_3ea;3ga_3ea;3ha_3ab;3ga_3ab;3ha_3eb;3ga_3eb;3ha_ctrl;3ga_ctrl;3ha_3bb;3ga_3bb;3ha_3da;3ga_3da;3ha_3ca;3ga_3ca;3ha_3cb;3ga_3cb;3ga_3ba;3ga_3aa;3ga_3db;3ga_3gb	carotene catabolic process [GO:0016121];carotene metabolic process [GO:0016119];carotenoid metabolic process [GO:0016116];lutein catabolic process [GO:0062172];lycopene catabolic process [GO:1901176];regulation of mitochondrial membrane potential [GO:0051881];regulation of reactive oxygen species metabolic process [GO:2000377];retinal metabolic process [GO:0042574];retinoic acid metabolic process…	mitochondrion [GO:0005739]	9,10 (9', 10')-carotenoid-cleaving dioxygenase activity [GO:0010437];beta,beta-carotene-9',10'-cleaving oxygenase activity [GO:0102076];beta-carotene 15,15'-dioxygenase activity [GO:0003834];carotenoid dioxygenase activity [GO:0010436];metal ion binding [GO:0046872];oxidoreductase activity, acting on single donors with incorporation of molecular oxygen, incorporation of two atoms of oxygen [GO:00…	mitochondrion [GO:0005739];9,10 (9', 10')-carotenoid-cleaving dioxygenase activity [GO:0010437];beta,beta-carotene-9',10'-cleaving oxygenase activity [GO:0102076];beta-carotene 15,15'-dioxygenase activity [GO:0003834];carotenoid dioxygenase activity [GO:0010436];metal ion binding [GO:0046872];oxidoreductase activity, acting on single donors with incorporation of molecular oxygen, incorporation of…	GO:0003834;GO:0005739;GO:0010436;GO:0010437;GO:0016116;GO:0016119;GO:0016121;GO:0016122;GO:0016124;GO:0016702;GO:0042573;GO:0042574;GO:0046872;GO:0051881;GO:0062172;GO:0102076;GO:1901176;GO:1901826;GO:2000377	1.13.11.-;1.13.11.71
0.1041	-0.0580492	-0.0712576	0.00816822	0.136697	-0.127763	-0.1221	0.0161352	0.00548458	-0.10517	0.295158	0.105882	0.0108652	0.999988	1.17757	0.0757532	0	Prenylcys_lyase	+	6.95457	0.000222222	Q9CQF9	Q9CQF9	PCYOX_MOUSE	Pcyox1	Prenylcysteine oxidase 1	3fb_3db;3ha_3db;3fb_3fa;3ha_3fa;3fb_ctrl;3ha_ctrl;3fb_3ca;3ha_3ca;3fb_3ba;3ha_3ba;3fb_3eb;3ha_3eb;3fb_3ab;3ha_3ab;3fb_3ea;3ha_3ea;3fb_3gb;3ha_3gb;3fb_3cb;3ha_3cb;3fb_3da;3ha_3da;3fb_3ia;3ha_3ia;3fb_3bb;3ha_3bb;3ha_3aa;3ha_3ga	chloride transmembrane transport [GO:1902476];prenylated protein catabolic process [GO:0030327];prenylcysteine catabolic process [GO:0030328]	lysosome [GO:0005764];plasma membrane [GO:0005886];very-low-density lipoprotein particle [GO:0034361]	FAD binding [GO:0071949];farnesylcysteine lyase activity [GO:0102149];prenylcysteine oxidase activity [GO:0001735]	lysosome [GO:0005764];plasma membrane [GO:0005886];very-low-density lipoprotein particle [GO:0034361];FAD binding [GO:0071949];farnesylcysteine lyase activity [GO:0102149];prenylcysteine oxidase activity [GO:0001735];chloride transmembrane transport [GO:1902476];prenylated protein catabolic process [GO:0030327];prenylcysteine catabolic process [GO:0030328]	GO:0001735;GO:0005764;GO:0005886;GO:0030327;GO:0030328;GO:0034361;GO:0071949;GO:0102149;GO:1902476	1.8.3.5
-0.103224	-0.0208082	0.05019	0.0451117	-0.309315	0.0513792	-0.0884686	-0.097415	-0.0661774	-0.152014	-0.188753	0.109173	-0.0234613	1.03458	-0.0305843	-0.0319824	0	Peptidase_M16;Peptidase_M16_C	+	5.81231	0.00156863	Q9CXT8	Q9CXT8	MPPB_MOUSE	Pmpcb	Mitochondrial-processing peptidase subunit beta	3fb_3da;3fb_3ea;3fb_3ga;3fb_3fa;3fb_3ca;3fb_ctrl;3fb_3eb;3fb_3aa;3fb_3ia;3fb_3ha;3fb_3cb;3fb_3ab;3fb_3ba;3fb_3bb;3fb_3db;3fb_3gb	protein processing [GO:0016485];protein processing involved in protein targeting to mitochondrion [GO:0006627]	mitochondrial inner membrane [GO:0005743];mitochondrial processing peptidase complex [GO:0017087];mitochondrion [GO:0005739]	endopeptidase activity [GO:0004175];metal ion binding [GO:0046872];metalloendopeptidase activity [GO:0004222];metallopeptidase activity [GO:0008237]	mitochondrial inner membrane [GO:0005743];mitochondrial processing peptidase complex [GO:0017087];mitochondrion [GO:0005739];endopeptidase activity [GO:0004175];metal ion binding [GO:0046872];metalloendopeptidase activity [GO:0004222];metallopeptidase activity [GO:0008237];protein processing [GO:0016485];protein processing involved in protein targeting to mitochondrion [GO:0006627]	GO:0004175;GO:0004222;GO:0005739;GO:0005743;GO:0006627;GO:0008237;GO:0016485;GO:0017087;GO:0046872	3.4.24.64
0.46529	0.118793	0.245251	0.229962	0.24757	0.17003	0.140121	0.12079	-0.00603199	-0.150478	0.465532	0.246902	0.172565	-0.0105495	0.498762	0.588793	0	Steroid_dh	+	5.42105	0.00222222	Q9CY27	Q9CY27	TECR_MOUSE	Tecr	Very-long-chain enoyl-CoA reductase	3aa_3eb;3ga_3eb;3ha_3eb;3ia_3eb;3ha_3ea;3ia_3ea;3ha_ctrl;3ia_ctrl;3ia_3ab;3ia_3fb;3ia_3db;3ia_3cb;3ia_3ca	fatty acid elongation [GO:0030497];sphingolipid metabolic process [GO:0006665];steroid biosynthetic process [GO:0006694];very long-chain fatty acid biosynthetic process [GO:0042761]	endoplasmic reticulum [GO:0005783];endoplasmic reticulum membrane [GO:0005789]	oxidoreductase activity [GO:0016491];very-long-chain enoyl-CoA reductase activity [GO:0102758]	endoplasmic reticulum [GO:0005783];endoplasmic reticulum membrane [GO:0005789];oxidoreductase activity [GO:0016491];very-long-chain enoyl-CoA reductase activity [GO:0102758];fatty acid elongation [GO:0030497];sphingolipid metabolic process [GO:0006665];steroid biosynthetic process [GO:0006694];very long-chain fatty acid biosynthetic process [GO:0042761]	GO:0005783;GO:0005789;GO:0006665;GO:0006694;GO:0016491;GO:0030497;GO:0042761;GO:0102758	1.3.1.93
1.56985	-0.134624	0.172316	0.109638	0.0825443	0.0664539	0.0346622	-0.129601	-0.143619	-0.161748	0.265833	-0.0310259	-0.320699	-0.211418	0.183666	0.480528	0	Sdh_cyt	+	7.09652	0.000121212	Q9CZB0	Q9CZB0	C560_MOUSE	Sdhc	Succinate dehydrogenase cytochrome b560 subunit, mitochondrial	3ia_3ea;3aa_3ea;3aa_3fa;3aa_3gb;3aa_3fb;3aa_3db;3aa_3ab;3aa_3cb;3aa_3eb;3aa_ctrl;3aa_3ca;3aa_3ha;3aa_3da;3aa_3bb;3aa_3ba;3aa_3ga;3aa_3ia	mitochondrial electron transport, succinate to ubiquinone [GO:0006121];proton motive force-driven mitochondrial ATP synthesis [GO:0042776];tricarboxylic acid cycle [GO:0006099]	mitochondrial inner membrane [GO:0005743];mitochondrial respiratory chain complex II, succinate dehydrogenase complex (ubiquinone) [GO:0005749];mitochondrion [GO:0005739];succinate dehydrogenase complex (ubiquinone) [GO:0045257]	electron transfer activity [GO:0009055];heme binding [GO:0020037];metal ion binding [GO:0046872];succinate dehydrogenase activity [GO:0000104]	mitochondrial inner membrane [GO:0005743];mitochondrial respiratory chain complex II, succinate dehydrogenase complex (ubiquinone) [GO:0005749];mitochondrion [GO:0005739];succinate dehydrogenase complex (ubiquinone) [GO:0045257];electron transfer activity [GO:0009055];heme binding [GO:0020037];metal ion binding [GO:0046872];succinate dehydrogenase activity [GO:0000104];mitochondrial electron tran…	GO:0000104;GO:0005739;GO:0005743;GO:0005749;GO:0006099;GO:0006121;GO:0009055;GO:0020037;GO:0042776;GO:0045257;GO:0046872
-0.0811815	0.545575	0.0917587	0.680021	-0.0109682	-0.0458183	-0.0454245	-0.148973	0.163304	0.111018	-0.0131407	1.91448	0.107	1.49795	0.0554771	-0.0426874	0	Pterin_4a	+	12.5214	0	Q9CZL5	Q9CZL5	PHS2_MOUSE	Pcbd2	Pterin-4-alpha-carbinolamine dehydratase 2	3fb_3ia;3gb_3ia;3fb_3cb;3gb_3cb;3fb_3eb;3gb_3eb;3fb_3db;3gb_3db;3fb_ctrl;3gb_ctrl;3fb_3ca;3gb_3ca;3fb_3da;3gb_3da;3fb_3ha;3gb_3ha;3fb_3aa;3gb_3aa;3fb_3ba;3gb_3ba;3fb_3ga;3gb_3ga;3fb_3fa;3gb_3fa;3fb_3ea;3gb_3ea;3gb_3ab;3gb_3bb	positive regulation of DNA-templated transcription [GO:0045893];tetrahydrobiopterin biosynthetic process [GO:0006729]	mitochondrion [GO:0005739];nucleus [GO:0005634]	4-alpha-hydroxytetrahydrobiopterin dehydratase activity [GO:0008124];identical protein binding [GO:0042802];phenylalanine 4-monooxygenase activity [GO:0004505]	mitochondrion [GO:0005739];nucleus [GO:0005634];4-alpha-hydroxytetrahydrobiopterin dehydratase activity [GO:0008124];identical protein binding [GO:0042802];phenylalanine 4-monooxygenase activity [GO:0004505];positive regulation of DNA-templated transcription [GO:0045893];tetrahydrobiopterin biosynthetic process [GO:0006729]	GO:0004505;GO:0005634;GO:0005739;GO:0006729;GO:0008124;GO:0042802;GO:0045893	4.2.1.96
0.0740528	0.142627	-0.054718	0.966181	0.0571861	-0.0816326	-0.0697556	0.019989	0.083415	0.028513	-0.156278	0.0191383	-0.0174236	0.11198	-0.131716	-0.179691	0	Transket_pyr;Transketolase_C	+	3.8632	0.0183797	Q9D051	Q9D051	ODPB_MOUSE	Pdhb	Pyruvate dehydrogenase E1 component subunit beta, mitochondrial	3bb_3ha;3bb_3fa;3bb_3ca;3bb_3ia;3bb_3ga;3bb_3db;3bb_3aa;3bb_3ea;3bb_3ba;3bb_ctrl;3bb_3da;3bb_3cb;3bb_3eb;3bb_3gb;3bb_3fb	acetyl-CoA biosynthetic process from pyruvate [GO:0006086];glucose metabolic process [GO:0006006];tricarboxylic acid cycle [GO:0006099]	acetyltransferase complex [GO:1902493];catalytic complex [GO:1902494];dihydrolipoyl dehydrogenase complex [GO:0045240];mitochondrial pyruvate dehydrogenase complex [GO:0005967];mitochondrion [GO:0005739];nucleoplasm [GO:0005654];pyruvate dehydrogenase complex [GO:0045254]	pyruvate dehydrogenase (acetyl-transferring) activity [GO:0004739];pyruvate dehydrogenase (NAD+) activity [GO:0034604]	acetyltransferase complex [GO:1902493];catalytic complex [GO:1902494];dihydrolipoyl dehydrogenase complex [GO:0045240];mitochondrial pyruvate dehydrogenase complex [GO:0005967];mitochondrion [GO:0005739];nucleoplasm [GO:0005654];pyruvate dehydrogenase complex [GO:0045254];pyruvate dehydrogenase (acetyl-transferring) activity [GO:0004739];pyruvate dehydrogenase (NAD+) activity [GO:0034604];acetyl-…	GO:0004739;GO:0005654;GO:0005739;GO:0005967;GO:0006006;GO:0006086;GO:0006099;GO:0034604;GO:0045240;GO:0045254;GO:1902493;GO:1902494	1.2.4.1
0.954685	0.388347	0.246489	-0.0228252	0.0030098	0.00617504	-0.2451	-0.00543213	0.129194	-0.10951	0.2816	0.126898	0.171886	0.0741825	0.728197	0.224554	0	Thioredoxin	+	6.17139	0.00102128	Q9D710	Q9D710	TMX2_MOUSE	Tmx2	Thioredoxin-related transmembrane protein 2	3ha_3ca;3aa_3ca;3ha_3db;3aa_3db;3ha_3eb;3aa_3eb;3ha_ctrl;3aa_ctrl;3ha_3bb;3aa_3bb;3ha_3da;3aa_3da;3ha_3fb;3aa_3fb;3ha_3gb;3aa_3gb;3ha_3cb;3aa_3cb;3aa_3fa;3aa_3ia;3aa_3ga;3aa_3ba	brain development [GO:0007420]	endoplasmic reticulum membrane [GO:0005789];membrane-bounded organelle [GO:0043227];mitochondria-associated endoplasmic reticulum membrane [GO:0044233];mitochondrial membrane [GO:0031966];mitochondrion [GO:0005739]	disulfide oxidoreductase activity [GO:0015036];identical protein binding [GO:0042802]	endoplasmic reticulum membrane [GO:0005789];membrane-bounded organelle [GO:0043227];mitochondria-associated endoplasmic reticulum membrane [GO:0044233];mitochondrial membrane [GO:0031966];mitochondrion [GO:0005739];disulfide oxidoreductase activity [GO:0015036];identical protein binding [GO:0042802];brain development [GO:0007420]	GO:0005739;GO:0005789;GO:0007420;GO:0015036;GO:0031966;GO:0042802;GO:0043227;GO:0044233
0.267035	0.0265551	0.0502167	-0.011775	-0.138518	-0.0443316	-0.301826	-0.174214	-0.142488	-0.0585804	0.163315	0.0784531	0.53179	-0.169964	2.64133	0.350562	0	Str_synth	+	21.0538	0	Q9D7N9	Q9D7N9	APMAP_MOUSE	Apmap	Adipocyte plasma membrane-associated protein	3fa_3ca;3ha_3ca;3ha_3da;3ha_3ea;3ha_3cb;3ha_3eb;3ha_3db;3ha_3ab;3ha_ctrl;3ha_3fb;3ha_3ba;3ha_3bb;3ha_3gb;3ha_3ga;3ha_3aa;3ha_3ia;3ha_3fa	biosynthetic process [GO:0009058]	cell surface [GO:0009986];membrane [GO:0016020]	arylesterase activity [GO:0004064];strictosidine synthase activity [GO:0016844]	cell surface [GO:0009986];membrane [GO:0016020];arylesterase activity [GO:0004064];strictosidine synthase activity [GO:0016844];biosynthetic process [GO:0009058]	GO:0004064;GO:0009058;GO:0009986;GO:0016020;GO:0016844
1.79289	1.21214	1.48602	1.81978	1.9996	1.81026	1.75696	1.77165	0.516326	0.107114	1.66898	1.96704	1.3829	2.00376	1.25819	1.00187	0	p450	+	7.37355	0	Q9DBG1	Q9DBG1	CP27A_MOUSE	Cyp27a1	Sterol 26-hydroxylase, mitochondrial	3ab_ctrl;3ba_ctrl;3cb_ctrl;3fa_ctrl;3db_ctrl;3ca_ctrl;3ga_ctrl;3bb_ctrl;3aa_ctrl;3gb_ctrl;3da_ctrl;3fb_ctrl;3ab_3eb;3ba_3eb;3cb_3eb;3fa_3eb;3db_3eb;3ca_3eb;3ga_3eb;3bb_3eb;3aa_3eb;3gb_3eb;3da_3eb;3fb_3eb;3gb_3ea;3da_3ea;3fb_3ea	bile acid biosynthetic process [GO:0006699];C21-steroid hormone biosynthetic process [GO:0006700];calcitriol biosynthetic process from calciol [GO:0036378];cholesterol catabolic process [GO:0006707];cholesterol metabolic process [GO:0008203]	mitochondrial envelope [GO:0005740];mitochondrial inner membrane [GO:0005743];mitochondrion [GO:0005739]	3-alpha,7-alpha,12-alpha-trihydroxycholestan-26-al 26-oxidoreductase activity [GO:0047103];cholestanetetraol 26-dehydrogenase activity [GO:0047748];cholestanetriol 26-monooxygenase activity [GO:0047749];cholesterol 26-hydroxylase activity [GO:0031073];cholesterol 7-alpha-monooxygenase activity [GO:0008123];cholesterol monooxygenase (side-chain-cleaving) activity [GO:0008386];heme binding [GO:0020…	mitochondrial envelope [GO:0005740];mitochondrial inner membrane [GO:0005743];mitochondrion [GO:0005739];3-alpha,7-alpha,12-alpha-trihydroxycholestan-26-al 26-oxidoreductase activity [GO:0047103];cholestanetetraol 26-dehydrogenase activity [GO:0047748];cholestanetriol 26-monooxygenase activity [GO:0047749];cholesterol 26-hydroxylase activity [GO:0031073];cholesterol 7-alpha-monooxygenase activity…	GO:0005506;GO:0005739;GO:0005740;GO:0005743;GO:0006699;GO:0006700;GO:0006707;GO:0008123;GO:0008203;GO:0008386;GO:0020037;GO:0030343;GO:0030544;GO:0031073;GO:0036378;GO:0047103;GO:0047748;GO:0047749	1.14.15.15
-0.0358505	-0.376709	-0.0710526	-0.138103	0.581226	-4.76837E-05	-0.110516	-0.0489874	-0.283838	-0.0927286	0.0334902	-0.0555735	-0.348715	-0.154903	-0.160435	-0.0531731	0	Oxidored_q6	+	3.74623	0.021253	Q9DC70	Q9DC70	NDUS7_MOUSE	Ndufs7	NADH dehydrogenase [ubiquinone] iron-sulfur protein 7, mitochondrial	3da_3ea;3da_3fa;3da_3ha;3da_3ab;3da_3bb;3da_3eb;3da_3fb;3da_3ca;3da_3gb;3da_3ga;3da_3ba;3da_ctrl;3da_3db;3da_3cb	aerobic respiration [GO:0009060];electron transport coupled proton transport [GO:0015990];mitochondrial electron transport, NADH to ubiquinone [GO:0006120];mitochondrial respiratory chain complex I assembly [GO:0032981];proton motive force-driven mitochondrial ATP synthesis [GO:0042776]	mitochondrial inner membrane [GO:0005743];mitochondrial respiratory chain complex I [GO:0005747];mitochondrion [GO:0005739];neuron projection [GO:0043005];neuronal cell body [GO:0043025];synaptic membrane [GO:0097060]	4 iron, 4 sulfur cluster binding [GO:0051539];metal ion binding [GO:0046872];NADH dehydrogenase (ubiquinone) activity [GO:0008137];NADH dehydrogenase activity [GO:0003954];protease binding [GO:0002020];quinone binding [GO:0048038]	mitochondrial inner membrane [GO:0005743];mitochondrial respiratory chain complex I [GO:0005747];mitochondrion [GO:0005739];neuron projection [GO:0043005];neuronal cell body [GO:0043025];synaptic membrane [GO:0097060];4 iron, 4 sulfur cluster binding [GO:0051539];metal ion binding [GO:0046872];NADH dehydrogenase (ubiquinone) activity [GO:0008137];NADH dehydrogenase activity [GO:0003954];protease …	GO:0002020;GO:0003954;GO:0005739;GO:0005743;GO:0005747;GO:0006120;GO:0008137;GO:0009060;GO:0015990;GO:0032981;GO:0042776;GO:0043005;GO:0043025;GO:0046872;GO:0048038;GO:0051539;GO:0097060	7.1.1.2
2.0644	1.34117	1.27798	2.48759	1.7119	2.34767	1.26615	2.14297	1.06841	-0.680694	2.03841	2.57668	2.05936	2.38317	0.318436	0.106651	0	Fe-S_biosyn	+	3.68185	0.0229767	Q9DCB8	Q9DCB8	ISCA2_MOUSE	Isca2	Iron-sulfur cluster assembly 2 homolog, mitochondrial	3fb_3eb;3gb_3eb;3fb_ctrl;3gb_ctrl;3gb_3ia	iron-sulfur cluster assembly [GO:0016226];protein maturation by [4Fe-4S] cluster transfer [GO:0106035]	mitochondrion [GO:0005739]	2 iron, 2 sulfur cluster binding [GO:0051537];4 iron, 4 sulfur cluster binding [GO:0051539];identical protein binding [GO:0042802];iron ion binding [GO:0005506]	mitochondrion [GO:0005739];2 iron, 2 sulfur cluster binding [GO:0051537];4 iron, 4 sulfur cluster binding [GO:0051539];identical protein binding [GO:0042802];iron ion binding [GO:0005506];iron-sulfur cluster assembly [GO:0016226];protein maturation by [4Fe-4S] cluster transfer [GO:0106035]	GO:0005506;GO:0005739;GO:0016226;GO:0042802;GO:0051537;GO:0051539;GO:0106035
0.925133	0.636404	1.55999	1.15521	-0.252197	-0.305088	-0.299406	0.0548401	-0.0575476	-0.0816488	-0.236942	-0.0156746	-0.203417	0.0682621	0.596064	-0.0683565	0	START	+	17.5783	0	Q9EPQ7	Q9EPQ7	STAR5_MOUSE	Stard5	StAR-related lipid transfer protein 5	3ha_3db;3ab_3db;3aa_3db;3bb_3db;3ba_3db;3ha_3ga;3ab_3ga;3aa_3ga;3bb_3ga;3ba_3ga;3ha_3ca;3ab_3ca;3aa_3ca;3bb_3ca;3ba_3ca;3ha_3da;3ab_3da;3aa_3da;3bb_3da;3ba_3da;3ab_3ia;3aa_3ia;3bb_3ia;3ba_3ia;3aa_3ea;3bb_3ea;3ba_3ea;3aa_3fa;3bb_3fa;3ba_3fa;3aa_3eb;3bb_3eb;3ba_3eb;3aa_3cb;3bb_3cb;3ba_3cb;3aa_3gb;3bb_3gb;3ba_3gb;3aa_ctrl;3bb_ctrl;3ba_ctrl;3aa_3fb;3bb_3fb;3ba_3fb;3ba_3ha;3ba_3ab	cholesterol import [GO:0070508]		cholesterol binding [GO:0015485];cholesterol transfer activity [GO:0120020]	cholesterol binding [GO:0015485];cholesterol transfer activity [GO:0120020];cholesterol import [GO:0070508]	GO:0015485;GO:0070508;GO:0120020
-0.0120049	-0.162502	-0.0907412	-0.16681	-0.103814	-0.248968	-0.138117	0.0215015	-0.338551	-0.0549278	-0.05972	-0.0358229	-0.0557671	-0.229095	-0.159691	0.742094	0	EMP70	+	4.20686	0.0109859	Q9ET30	Q9ET30	TM9S3_MOUSE	Tm9sf3	Transmembrane 9 superfamily member 3	3ia_3ea;3ia_3eb;3ia_3ca;3ia_3fb;3ia_3ab;3ia_3ha;3ia_3bb;3ia_3db;3ia_3ga;3ia_3ba;3ia_3da;3ia_3gb;3ia_3fa;3ia_ctrl;3ia_3cb;3ia_3aa	protein localization to membrane [GO:0072657]	membrane [GO:0016020]		membrane [GO:0016020];protein localization to membrane [GO:0072657]	GO:0016020;GO:0072657
0.682472	1.30255	0.638828	1.64956	0.133404	0.159088	0.1066	0.148609	0.0287018	0.175644	0.149426	0.220287	0.144463	0.327377	0.309523	0.161032	0	Flavodoxin_2	+	11.2624	0	Q9JI75	NQO2_HUMAN;Q9JI75	NQO2_MOUSE	Nqo2	Ribosyldihydronicotinamide dehydrogenase [quinone]	3ab_3ea;3bb_3ea;3ab_3fa;3bb_3fa;3ab_ctrl;3bb_ctrl;3ab_3ca;3bb_3ca;3ab_3cb;3bb_3cb;3ab_3eb;3bb_3eb;3ab_3da;3bb_3da;3ab_3ga;3bb_3ga;3ab_3ia;3bb_3ia;3ab_3db;3bb_3db;3ab_3ha;3bb_3ha;3ab_3gb;3bb_3gb;3ab_3fb;3bb_3fb;3bb_3ba;3bb_3aa	positive regulation of ERK1 and ERK2 cascade [GO:0070374];positive regulation of neuron apoptotic process [GO:0043525];positive regulation of reactive oxygen species metabolic process [GO:2000379];positive regulation of vascular associated smooth muscle cell proliferation [GO:1904707];quinone catabolic process [GO:1901662]	cytosol [GO:0005829];nucleoplasm [GO:0005654]	chloride ion binding [GO:0031404];dihydronicotinamide riboside quinone reductase activity [GO:0001512];electron transfer activity [GO:0009055];FAD binding [GO:0071949];melatonin binding [GO:1904408];NAD(P)H dehydrogenase (quinone) activity [GO:0003955];oxidoreductase activity [GO:0016491];oxidoreductase activity, acting on other nitrogenous compounds as donors [GO:0016661];protein homodimerizatio…	cytosol [GO:0005829];nucleoplasm [GO:0005654];chloride ion binding [GO:0031404];dihydronicotinamide riboside quinone reductase activity [GO:0001512];electron transfer activity [GO:0009055];FAD binding [GO:0071949];melatonin binding [GO:1904408];NAD(P)H dehydrogenase (quinone) activity [GO:0003955];oxidoreductase activity [GO:0016491];oxidoreductase activity, acting on other nitrogenous compounds …	GO:0001512;GO:0003955;GO:0005654;GO:0005829;GO:0008270;GO:0009055;GO:0016491;GO:0016661;GO:0031404;GO:0042803;GO:0043525;GO:0070374;GO:0071949;GO:1901662;GO:1904408;GO:1904707;GO:1905594;GO:2000379	1.10.5.1
1.07009	0.801246	0.651361	0.739988	1.46065	0.750926	1.40482	1.26893	0.24495	-0.211971	0.852712	0.416633	1.06681	1.14311	0.949025	0.21691	0	p450	+	4.74	0.0055625	Q9JKJ9	Q9JKJ9	CP39A_MOUSE	Cyp39a1	24-hydroxycholesterol 7-alpha-hydroxylase	3cb_3eb;3fb_3eb;3da_3eb;3ca_3eb;3cb_ctrl;3da_ctrl;3ca_ctrl;3da_3ea;3ca_3ea	bile acid biosynthetic process [GO:0006699];bile acid catabolic process [GO:0030573];cholesterol catabolic process [GO:0006707];cholesterol homeostasis [GO:0042632];digestion [GO:0007586]	endoplasmic reticulum membrane [GO:0005789];intracellular membrane-bounded organelle [GO:0043231]	24-hydroxycholesterol 7alpha-hydroxylase activity [GO:0033782];heme binding [GO:0020037];iron ion binding [GO:0005506];oxysterol 7-alpha-hydroxylase activity [GO:0008396];steroid 7-alpha-hydroxylase activity [GO:0008387]	endoplasmic reticulum membrane [GO:0005789];intracellular membrane-bounded organelle [GO:0043231];24-hydroxycholesterol 7alpha-hydroxylase activity [GO:0033782];heme binding [GO:0020037];iron ion binding [GO:0005506];oxysterol 7-alpha-hydroxylase activity [GO:0008396];steroid 7-alpha-hydroxylase activity [GO:0008387];bile acid biosynthetic process [GO:0006699];bile acid catabolic process [GO:0030…	GO:0005506;GO:0005789;GO:0006699;GO:0006707;GO:0007586;GO:0008387;GO:0008396;GO:0020037;GO:0030573;GO:0033782;GO:0042632;GO:0043231	1.14.14.26
0.0173874	0.0365944	0.00351715	0.0138969	0.0799408	-0.010685	-0.0170631	0.00662613	0.0434265	0.0218258	-0.0977154	-0.045948	0.052269	0.849903	0.551247	-0.0463715	0	Aldedh	+	3.94809	0.0158974	Q9JLJ2	Q9JLJ2	AL9A1_MOUSE	Aldh9a1	4-trimethylaminobutyraldehyde dehydrogenase	3fb_3db;3fb_3ga;3fb_3cb;3fb_3ia;3fb_3fa;3fb_3eb;3fb_ctrl;3fb_3gb;3fb_3bb;3fb_3ba;3fb_3ca;3fb_3aa;3fb_3ab;3fb_3ea;3fb_3da	carnitine biosynthetic process [GO:0045329];carnitine metabolic process [GO:0009437];cellular aldehyde metabolic process [GO:0006081];neurotransmitter biosynthetic process [GO:0042136];protein homotetramerization [GO:0051289]	cytosol [GO:0005829];mitochondrion [GO:0005739]	4-trimethylammoniobutyraldehyde dehydrogenase activity [GO:0047105];aldehyde dehydrogenase (NAD+) activity [GO:0004029];amine binding [GO:0043176];aminobutyraldehyde dehydrogenase activity [GO:0019145];glyceraldehyde-3-phosphate dehydrogenase (NAD+) (non-phosphorylating) activity [GO:0043878];identical protein binding [GO:0042802];NAD binding [GO:0051287];oxidoreductase activity, acting on the al…	cytosol [GO:0005829];mitochondrion [GO:0005739];4-trimethylammoniobutyraldehyde dehydrogenase activity [GO:0047105];aldehyde dehydrogenase (NAD+) activity [GO:0004029];amine binding [GO:0043176];aminobutyraldehyde dehydrogenase activity [GO:0019145];glyceraldehyde-3-phosphate dehydrogenase (NAD+) (non-phosphorylating) activity [GO:0043878];identical protein binding [GO:0042802];NAD binding [GO:00…	GO:0004029;GO:0005739;GO:0005829;GO:0006081;GO:0009437;GO:0016620;GO:0019145;GO:0036094;GO:0042136;GO:0042802;GO:0043176;GO:0043878;GO:0045329;GO:0047105;GO:0051287;GO:0051289	1.2.1.3;1.2.1.47
1.4791	1.48513	1.45686	1.73621	0.61345	1.61541	1.17889	1.63038	0.813712	1.38049	1.83517	2.45501	1.50266	3.62559	3.30742	2.95636	0	Nfu_N;NifU	+	6.99272	0.000228571	Q9QZ23	Q9QZ23	NFU1_MOUSE	Nfu1	NFU1 iron-sulfur cluster scaffold homolog, mitochondrial	3gb_ctrl;3ia_ctrl;3ha_ctrl;3fb_ctrl;3ia_3da;3ha_3da;3fb_3da;3ia_3ea;3ha_3ea;3fb_3ea;3fb_3ca;3fb_3fa;3fb_3eb;3fb_3ab;3fb_3ba;3fb_3aa	iron-sulfur cluster assembly [GO:0016226]	cytosol [GO:0005829];mitochondrion [GO:0005739];nucleoplasm [GO:0005654];nucleus [GO:0005634]	4 iron, 4 sulfur cluster binding [GO:0051539];iron ion binding [GO:0005506]	cytosol [GO:0005829];mitochondrion [GO:0005739];nucleoplasm [GO:0005654];nucleus [GO:0005634];4 iron, 4 sulfur cluster binding [GO:0051539];iron ion binding [GO:0005506];iron-sulfur cluster assembly [GO:0016226]	GO:0005506;GO:0005634;GO:0005654;GO:0005739;GO:0005829;GO:0016226;GO:0051539
1.44244	0.0895138	0.561038	0.295124	0.0461674	0.0600061	0.239934	0.110985	-0.202262	0.11307	0.34684	-0.0377417	0.564337	0.0456142	0.13047	0.0407524	0	Pro_dh	+	8.91076	0	Q9WU79	Q9WU79	PROD_MOUSE	Prodh	Proline dehydrogenase 1, mitochondrial	3fa_3ea;3ba_3ea;3aa_3ea;3aa_3gb;3aa_3da;3aa_ctrl;3aa_3eb;3aa_3ab;3aa_3db;3aa_3ia;3aa_3fb;3aa_3ha;3aa_3cb;3aa_3bb;3aa_3ca;3aa_3ga;3aa_3fa;3aa_3ba	positive regulation of cell death [GO:0010942];proline catabolic process to glutamate [GO:0010133]	intracellular membrane-bounded organelle [GO:0043231];mitochondrial inner membrane [GO:0005743];mitochondrial matrix [GO:0005759];mitochondrion [GO:0005739];nucleoplasm [GO:0005654]	amino acid binding [GO:0016597];FAD binding [GO:0071949];proline dehydrogenase activity [GO:0004657]	intracellular membrane-bounded organelle [GO:0043231];mitochondrial inner membrane [GO:0005743];mitochondrial matrix [GO:0005759];mitochondrion [GO:0005739];nucleoplasm [GO:0005654];amino acid binding [GO:0016597];FAD binding [GO:0071949];proline dehydrogenase activity [GO:0004657];positive regulation of cell death [GO:0010942];proline catabolic process to glutamate [GO:0010133]	GO:0004657;GO:0005654;GO:0005739;GO:0005743;GO:0005759;GO:0010133;GO:0010942;GO:0016597;GO:0043231;GO:0071949	1.5.5.2
1.16313	2.27448	0.715443	1.51098	-0.0125914	0.278728	0.131846	0.123841	0.026927	0.0864105	0.256882	1.22187	0.0870152	1.36555	0.15901	0.133215	0	Aminotran_5	+	16.8726	0	Q9Z1J3	Q9Z1J3	NFS1_MOUSE	Nfs1	Cysteine desulfurase	3aa_3da;3gb_3da;3fb_3da;3bb_3da;3ab_3da;3aa_3fa;3gb_3fa;3fb_3fa;3bb_3fa;3ab_3fa;3aa_ctrl;3gb_ctrl;3fb_ctrl;3bb_ctrl;3ab_ctrl;3aa_3eb;3gb_3eb;3fb_3eb;3bb_3eb;3ab_3eb;3aa_3ea;3gb_3ea;3fb_3ea;3bb_3ea;3ab_3ea;3aa_3ca;3gb_3ca;3fb_3ca;3bb_3ca;3ab_3ca;3aa_3ha;3gb_3ha;3fb_3ha;3bb_3ha;3ab_3ha;3aa_3ga;3gb_3ga;3fb_3ga;3bb_3ga;3ab_3ga;3aa_3cb;3gb_3cb;3fb_3cb;3bb_3cb;3ab_3cb;3gb_3ia;3fb_3ia;3bb_3ia;3ab_3ia;3f…	[2Fe-2S] cluster assembly [GO:0044571];[4Fe-4S] cluster assembly [GO:0044572];iron incorporation into metallo-sulfur cluster [GO:0018283];iron-sulfur cluster assembly [GO:0016226];Mo-molybdopterin cofactor biosynthetic process [GO:0006777];molybdopterin cofactor metabolic process [GO:0043545]	cytosol [GO:0005829];iron-sulfur cluster assembly complex [GO:1990229];mitochondrial iron-sulfur cluster assembly complex [GO:0099128];mitochondrial matrix [GO:0005759];mitochondrion [GO:0005739];nucleoplasm [GO:0005654];nucleus [GO:0005634]	cysteine desulfurase activity [GO:0031071];iron-sulfur cluster binding [GO:0051536];metal ion binding [GO:0046872];protein homodimerization activity [GO:0042803];pyridoxal phosphate binding [GO:0030170]	cytosol [GO:0005829];iron-sulfur cluster assembly complex [GO:1990229];mitochondrial iron-sulfur cluster assembly complex [GO:0099128];mitochondrial matrix [GO:0005759];mitochondrion [GO:0005739];nucleoplasm [GO:0005654];nucleus [GO:0005634];cysteine desulfurase activity [GO:0031071];iron-sulfur cluster binding [GO:0051536];metal ion binding [GO:0046872];protein homodimerization activity [GO:0042…	GO:0005634;GO:0005654;GO:0005739;GO:0005759;GO:0005829;GO:0006777;GO:0016226;GO:0018283;GO:0030170;GO:0031071;GO:0042803;GO:0043545;GO:0044571;GO:0044572;GO:0046872;GO:0051536;GO:0099128;GO:1990229	2.8.1.7
2.24171	2.20805	1.14738	1.70787	0.125373	-0.249103	-0.0477991	-0.0381813	-0.206021	-0.0157299	0.430995	0.15695	-0.0619602	0.0876284	0.48562	0.389857	0	Mito_carr	+	19.4325	0	Q9Z2Z6	Q9Z2Z6	MCAT_MOUSE	Slc25a20	Mitochondrial carnitine/acylcarnitine carrier protein	3ba_3fa;3bb_3fa;3aa_3fa;3ab_3fa;3ba_3ea;3bb_3ea;3aa_3ea;3ab_3ea;3ba_3db;3bb_3db;3aa_3db;3ab_3db;3ba_ctrl;3bb_ctrl;3aa_ctrl;3ab_ctrl;3ba_3ca;3bb_3ca;3aa_3ca;3ab_3ca;3ba_3cb;3bb_3cb;3aa_3cb;3ab_3cb;3ba_3da;3bb_3da;3aa_3da;3ab_3da;3ba_3gb;3bb_3gb;3aa_3gb;3ab_3gb;3bb_3eb;3aa_3eb;3ab_3eb;3bb_3fb;3aa_3fb;3ab_3fb;3bb_3ga;3aa_3ga;3ab_3ga;3bb_3ha;3aa_3ha;3ab_3ha;3bb_3ia;3aa_3ia;3ab_3ia;3aa_3ba;3ab_3ba	carnitine transmembrane transport [GO:1902603];in utero embryonic development [GO:0001701];lipid transport [GO:0006869];mitochondrial transport [GO:0006839]	cytosol [GO:0005829];mitochondrial envelope [GO:0005740];mitochondrial inner membrane [GO:0005743];mitochondrion [GO:0005739]	acyl carnitine transmembrane transporter activity [GO:0015227]	cytosol [GO:0005829];mitochondrial envelope [GO:0005740];mitochondrial inner membrane [GO:0005743];mitochondrion [GO:0005739];acyl carnitine transmembrane transporter activity [GO:0015227];carnitine transmembrane transport [GO:1902603];in utero embryonic development [GO:0001701];lipid transport [GO:0006869];mitochondrial transport [GO:0006839]	GO:0001701;GO:0005739;GO:0005740;GO:0005743;GO:0005829;GO:0006839;GO:0006869;GO:0015227;GO:1902603

## Sheet: ClusterAnalysis
3ha	3fb	3gb	3ia	3eb	3ea	3db	3cb	3ca	3da	3ga	3fa	3bb	3ab	3ba	3aa	C: Pfam	C: ANOVA Significant	N: -Log ANOVA p value	N: ANOVA q-value	T: Protein.Group	T: Protein.Ids	T: Protein.Names	T: Genes	T: First.Protein.Description	T: Significant pairs	T: Gene Ontology (biological process)	T: Gene Ontology (cellular component)	T: Gene Ontology (molecular function)	T: Gene Ontology (GO)	T: Gene Ontology IDs	T: EC number
0.153869	2.43761	2.52141	0.765483	0.177821	1.03671	2.3111	1.48992	1.01733	1.94575	1.75783	1.58553	2.38012	2.38812	1.74251	2.39746	BolA	+	15.0128	0	Q8CEI1	Q8CEI1	BOLA3_MOUSE	Bola3	BolA-like protein 3	3cb_ctrl;3fa_ctrl;3ba_ctrl;3da_ctrl;3ga_ctrl;3db_ctrl;3aa_ctrl;3ab_ctrl;3bb_ctrl;3gb_ctrl;3fb_ctrl;3ba_3eb;3da_3eb;3ga_3eb;3db_3eb;3aa_3eb;3ab_3eb;3bb_3eb;3gb_3eb;3fb_3eb;3fa_3ha;3ba_3ha;3da_3ha;3ga_3ha;3db_3ha;3aa_3ha;3ab_3ha;3bb_3ha;3gb_3ha;3fb_3ha;3da_3ia;3ga_3ia;3db_3ia;3aa_3ia;3ab_3ia;3bb_3ia;3gb_3ia;3fb_3ia;3aa_3ca;3ab_3ca;3bb_3ca;3gb_3ca;3fb_3ca;3ab_3ea;3bb_3ea;3gb_3ea;3fb_3ea	protein maturation by [4Fe-4S] cluster transfer [GO:0106035]	cytosol [GO:0005829];iron-sulfur cluster assembly complex [GO:1990229];mitochondrial matrix [GO:0005759];mitochondrion [GO:0005739];nuclear body [GO:0016604]		cytosol [GO:0005829];iron-sulfur cluster assembly complex [GO:1990229];mitochondrial matrix [GO:0005759];mitochondrion [GO:0005739];nuclear body [GO:0016604];protein maturation by [4Fe-4S] cluster transfer [GO:0106035]	GO:0005739;GO:0005759;GO:0005829;GO:0016604;GO:0106035;GO:1990229
0.318436	2.38317	2.57668	0.106651	-0.680694	1.06841	2.34767	2.14297	1.26615	1.7119	2.03841	2.05936	2.48759	1.34117	1.27798	2.0644	Fe-S_biosyn	+	3.68185	0.0229767	Q9DCB8	Q9DCB8	ISCA2_MOUSE	Isca2	Iron-sulfur cluster assembly 2 homolog, mitochondrial	3fb_3eb;3gb_3eb;3fb_ctrl;3gb_ctrl;3gb_3ia	iron-sulfur cluster assembly [GO:0016226];protein maturation by [4Fe-4S] cluster transfer [GO:0106035]	mitochondrion [GO:0005739]	2 iron, 2 sulfur cluster binding [GO:0051537];4 iron, 4 sulfur cluster binding [GO:0051539];identical protein binding [GO:0042802];iron ion binding [GO:0005506]	mitochondrion [GO:0005739];2 iron, 2 sulfur cluster binding [GO:0051537];4 iron, 4 sulfur cluster binding [GO:0051539];identical protein binding [GO:0042802];iron ion binding [GO:0005506];iron-sulfur cluster assembly [GO:0016226];protein maturation by [4Fe-4S] cluster transfer [GO:0106035]	GO:0005506;GO:0005739;GO:0016226;GO:0042802;GO:0051537;GO:0051539;GO:0106035
1.25819	2.00376	1.96704	1.00187	0.107114	0.516326	1.81026	1.77165	1.75696	1.9996	1.66898	1.3829	1.81978	1.21214	1.48602	1.79289	p450	+	7.37355	0	Q9DBG1	Q9DBG1	CP27A_MOUSE	Cyp27a1	Sterol 26-hydroxylase, mitochondrial	3ab_ctrl;3ba_ctrl;3cb_ctrl;3fa_ctrl;3db_ctrl;3ca_ctrl;3ga_ctrl;3bb_ctrl;3aa_ctrl;3gb_ctrl;3da_ctrl;3fb_ctrl;3ab_3eb;3ba_3eb;3cb_3eb;3fa_3eb;3db_3eb;3ca_3eb;3ga_3eb;3bb_3eb;3aa_3eb;3gb_3eb;3da_3eb;3fb_3eb;3gb_3ea;3da_3ea;3fb_3ea	bile acid biosynthetic process [GO:0006699];C21-steroid hormone biosynthetic process [GO:0006700];calcitriol biosynthetic process from calciol [GO:0036378];cholesterol catabolic process [GO:0006707];cholesterol metabolic process [GO:0008203]	mitochondrial envelope [GO:0005740];mitochondrial inner membrane [GO:0005743];mitochondrion [GO:0005739]	3-alpha,7-alpha,12-alpha-trihydroxycholestan-26-al 26-oxidoreductase activity [GO:0047103];cholestanetetraol 26-dehydrogenase activity [GO:0047748];cholestanetriol 26-monooxygenase activity [GO:0047749];cholesterol 26-hydroxylase activity [GO:0031073];cholesterol 7-alpha-monooxygenase activity [GO:0008123];cholesterol monooxygenase (side-chain-cleaving) activity [GO:0008386];heme binding [GO:0020…	mitochondrial envelope [GO:0005740];mitochondrial inner membrane [GO:0005743];mitochondrion [GO:0005739];3-alpha,7-alpha,12-alpha-trihydroxycholestan-26-al 26-oxidoreductase activity [GO:0047103];cholestanetetraol 26-dehydrogenase activity [GO:0047748];cholestanetriol 26-monooxygenase activity [GO:0047749];cholesterol 26-hydroxylase activity [GO:0031073];cholesterol 7-alpha-monooxygenase activity…	GO:0005506;GO:0005739;GO:0005740;GO:0005743;GO:0006699;GO:0006700;GO:0006707;GO:0008123;GO:0008203;GO:0008386;GO:0020037;GO:0030343;GO:0030544;GO:0031073;GO:0036378;GO:0047103;GO:0047748;GO:0047749	1.14.15.15
1.38026	1.79594	1.47655	1.51163	0.0799141	0.233292	1.13475	1.82218	2.33082	1.92237	1.68547	1.41776	1.14587	0.439297	0.818405	0.822325	p450	+	9.56824	0	P24456	P24456	CP2DA_MOUSE	Cyp2d10	Cytochrome P450 2D10	3fa_ctrl;3gb_ctrl;3ia_ctrl;3ha_ctrl;3cb_ctrl;3fb_ctrl;3ga_ctrl;3da_ctrl;3ca_ctrl;3ia_3eb;3ha_3eb;3cb_3eb;3fb_3eb;3ga_3eb;3da_3eb;3ca_3eb;3cb_3ea;3fb_3ea;3ga_3ea;3da_3ea;3ca_3ea;3fb_3ab;3ga_3ab;3da_3ab;3ca_3ab;3ca_3aa;3ca_3ba	arachidonic acid metabolic process [GO:0019369];xenobiotic metabolic process [GO:0006805]	cytoplasm [GO:0005737];endoplasmic reticulum membrane [GO:0005789];intracellular membrane-bounded organelle [GO:0043231];mitochondrion [GO:0005739]	anandamide 11,12 epoxidase activity [GO:0062188];anandamide 14,15 epoxidase activity [GO:0062189];anandamide 8,9 epoxidase activity [GO:0062187];aromatase activity [GO:0070330];heme binding [GO:0020037];iron ion binding [GO:0005506];monooxygenase activity [GO:0004497];oxidoreductase activity [GO:0016491];oxidoreductase activity, acting on paired donors, with incorporation or reduction of molecula…	cytoplasm [GO:0005737];endoplasmic reticulum membrane [GO:0005789];intracellular membrane-bounded organelle [GO:0043231];mitochondrion [GO:0005739];anandamide 11,12 epoxidase activity [GO:0062188];anandamide 14,15 epoxidase activity [GO:0062189];anandamide 8,9 epoxidase activity [GO:0062187];aromatase activity [GO:0070330];heme binding [GO:0020037];iron ion binding [GO:0005506];monooxygenase acti…	GO:0004497;GO:0005506;GO:0005737;GO:0005739;GO:0005789;GO:0006805;GO:0016491;GO:0016712;GO:0019369;GO:0020037;GO:0043231;GO:0062187;GO:0062188;GO:0062189;GO:0070330	1.14.14.1
3.30742	3.62559	2.45501	2.95636	1.38049	0.813712	1.61541	1.63038	1.17889	0.61345	1.83517	1.50266	1.73621	1.48513	1.45686	1.4791	Nfu_N;NifU	+	6.99272	0.000228571	Q9QZ23	Q9QZ23	NFU1_MOUSE	Nfu1	NFU1 iron-sulfur cluster scaffold homolog, mitochondrial	3gb_ctrl;3ia_ctrl;3ha_ctrl;3fb_ctrl;3ia_3da;3ha_3da;3fb_3da;3ia_3ea;3ha_3ea;3fb_3ea;3fb_3ca;3fb_3fa;3fb_3eb;3fb_3ab;3fb_3ba;3fb_3aa	iron-sulfur cluster assembly [GO:0016226]	cytosol [GO:0005829];mitochondrion [GO:0005739];nucleoplasm [GO:0005654];nucleus [GO:0005634]	4 iron, 4 sulfur cluster binding [GO:0051539];iron ion binding [GO:0005506]	cytosol [GO:0005829];mitochondrion [GO:0005739];nucleoplasm [GO:0005654];nucleus [GO:0005634];4 iron, 4 sulfur cluster binding [GO:0051539];iron ion binding [GO:0005506];iron-sulfur cluster assembly [GO:0016226]	GO:0005506;GO:0005634;GO:0005654;GO:0005739;GO:0005829;GO:0016226;GO:0051539
2.89059	1.55484	1.91097	1.80024	1.49163	1.52655	-0.0934086	1.27358	0.800075	1.66741	1.95838	1.87353	0.998364	1.57355	1.58188	1.85432	APOC4	+	3.38293	0.0388132	Q61268	Q61268	APOC4_MOUSE	Apoc4	Apolipoprotein C-IV	3ha_ctrl;3ha_3db;3ha_3ca;3ha_3bb;3ha_3ea;3ha_3cb;3ha_3ba	lipid transport [GO:0006869];positive regulation of sequestering of triglyceride [GO:0010890];triglyceride homeostasis [GO:0070328]	extracellular region [GO:0005576];high-density lipoprotein particle [GO:0034364];very-low-density lipoprotein particle [GO:0034361]		extracellular region [GO:0005576];high-density lipoprotein particle [GO:0034364];very-low-density lipoprotein particle [GO:0034361];lipid transport [GO:0006869];positive regulation of sequestering of triglyceride [GO:0010890];triglyceride homeostasis [GO:0070328]	GO:0005576;GO:0006869;GO:0010890;GO:0034361;GO:0034364;GO:0070328
0.183228	-2.28013	-0.0906172	0.733755	0.0895329	-1.20447	-0.116306	0.21687	0.0329762	0.0608006	0.737762	0.113898	0.115786	0.144483	0.0837841	0.392172	PRA1	+	4.37887	0.00919403	Q8R5J9	Q8R5J9	PRAF3_MOUSE	Arl6ip5	PRA1 family protein 3	3cb_3fb;3eb_3fb;3bb_3fb;3ab_3fb;3da_3fb;3ha_3fb;3aa_3fb;3ia_3fb;3ga_3fb;3ga_3ea	cellular response to organic cyclic compound [GO:0071407];glutathione metabolic process [GO:0006749];intrinsic apoptotic signaling pathway in response to oxidative stress [GO:0008631];L-glutamate import across plasma membrane [GO:0098712];L-glutamate transmembrane transport [GO:0015813];learning or memory [GO:0007611];negative regulation of L-glutamate import across plasma membrane [GO:0002037];n…	cytoplasm [GO:0005737];cytoskeleton [GO:0005856];endoplasmic reticulum membrane [GO:0005789];membrane [GO:0016020];plasma membrane [GO:0005886];presynaptic cytosol [GO:0099523]	transmembrane transporter binding [GO:0044325]	cytoplasm [GO:0005737];cytoskeleton [GO:0005856];endoplasmic reticulum membrane [GO:0005789];membrane [GO:0016020];plasma membrane [GO:0005886];presynaptic cytosol [GO:0099523];transmembrane transporter binding [GO:0044325];cellular response to organic cyclic compound [GO:0071407];glutathione metabolic process [GO:0006749];intrinsic apoptotic signaling pathway in response to oxidative stress [GO:…	GO:0002037;GO:0005737;GO:0005789;GO:0005856;GO:0005886;GO:0006749;GO:0007611;GO:0008631;GO:0010917;GO:0015031;GO:0015813;GO:0016020;GO:0032874;GO:0036475;GO:0043065;GO:0043280;GO:0044325;GO:0051051;GO:0051580;GO:0071407;GO:0072659;GO:0098712;GO:0099523
-0.410202	1.50527	1.08548	-0.64692	-0.772104	0.77663	1.43753	0.87048	0.880645	1.3089	0.622738	0.208451	1.87508	1.3414	0.8612	0.885908	CIAPIN1	+	4.87771	0.00465574	Q8WTY4	Q8WTY4	CPIN1_MOUSE	Ciapin1	Anamorsin	3db_3eb;3ab_3eb;3fb_3eb;3bb_3eb;3ab_3ia;3fb_3ia;3bb_3ia;3fb_3ha;3bb_3ha	apoptotic process [GO:0006915];hemopoiesis [GO:0030097];iron-sulfur cluster assembly [GO:0016226];negative regulation of apoptotic process [GO:0043066];sequestering of metal ion [GO:0051238]	cytoplasm [GO:0005737];mitochondrial intermembrane space [GO:0005758];mitochondrion [GO:0005739];nucleolus [GO:0005730];nucleoplasm [GO:0005654]	2 iron, 2 sulfur cluster binding [GO:0051537];4 iron, 4 sulfur cluster binding [GO:0051539];electron transfer activity [GO:0009055];metal ion binding [GO:0046872];methyltransferase activity [GO:0008168]	cytoplasm [GO:0005737];mitochondrial intermembrane space [GO:0005758];mitochondrion [GO:0005739];nucleolus [GO:0005730];nucleoplasm [GO:0005654];2 iron, 2 sulfur cluster binding [GO:0051537];4 iron, 4 sulfur cluster binding [GO:0051539];electron transfer activity [GO:0009055];metal ion binding [GO:0046872];methyltransferase activity [GO:0008168];apoptotic process [GO:0006915];hemopoiesis [GO:0030…	GO:0005654;GO:0005730;GO:0005737;GO:0005739;GO:0005758;GO:0006915;GO:0008168;GO:0009055;GO:0016226;GO:0030097;GO:0043066;GO:0046872;GO:0051238;GO:0051537;GO:0051539
0.436767	1.65154	1.52761	0.0483551	0.00537395	0.903546	1.19047	1.09418	1.04862	1.38352	1.41116	1.27255	1.57589	1.00679	1.28297	0.868582	Ald_Xan_dh_C;Ald_Xan_dh_C2;CO_deh_flav_C;FAD_binding_5;Fer2;Fer2_2	+	7.23067	0	O54754	O54754	AOXA_MOUSE	Aox1	Aldehyde oxidase 1	3fa_ctrl;3db_ctrl;3ba_ctrl;3bb_ctrl;3da_ctrl;3ga_ctrl;3fb_ctrl;3gb_ctrl;3fa_3ia;3db_3ia;3ba_3ia;3bb_3ia;3da_3ia;3ga_3ia;3fb_3ia;3gb_3ia;3db_3eb;3ba_3eb;3bb_3eb;3da_3eb;3ga_3eb;3fb_3eb;3gb_3eb;3fb_3ha;3gb_3ha	lipid metabolic process [GO:0006629];xenobiotic metabolic process [GO:0006805]	cytosol [GO:0005829]	2 iron, 2 sulfur cluster binding [GO:0051537];aldehyde oxidase activity [GO:0004031];electron transfer activity [GO:0009055];FAD binding [GO:0071949];flavin adenine dinucleotide binding [GO:0050660];identical protein binding [GO:0042802];iron ion binding [GO:0005506];molybdopterin cofactor binding [GO:0043546];NAD binding [GO:0051287];protein homodimerization activity [GO:0042803]	cytosol [GO:0005829];2 iron, 2 sulfur cluster binding [GO:0051537];aldehyde oxidase activity [GO:0004031];electron transfer activity [GO:0009055];FAD binding [GO:0071949];flavin adenine dinucleotide binding [GO:0050660];identical protein binding [GO:0042802];iron ion binding [GO:0005506];molybdopterin cofactor binding [GO:0043546];NAD binding [GO:0051287];protein homodimerization activity [GO:004…	GO:0004031;GO:0005506;GO:0005829;GO:0006629;GO:0006805;GO:0009055;GO:0042802;GO:0042803;GO:0043546;GO:0050660;GO:0051287;GO:0051537;GO:0071949	1.17.3.-;1.2.3.1
0.48562	0.0876284	0.15695	0.389857	-0.0157299	-0.206021	-0.249103	-0.0381813	-0.0477991	0.125373	0.430995	-0.0619602	1.70787	2.20805	1.14738	2.24171	Mito_carr	+	19.4325	0	Q9Z2Z6	Q9Z2Z6	MCAT_MOUSE	Slc25a20	Mitochondrial carnitine/acylcarnitine carrier protein	3ba_3fa;3bb_3fa;3aa_3fa;3ab_3fa;3ba_3ea;3bb_3ea;3aa_3ea;3ab_3ea;3ba_3db;3bb_3db;3aa_3db;3ab_3db;3ba_ctrl;3bb_ctrl;3aa_ctrl;3ab_ctrl;3ba_3ca;3bb_3ca;3aa_3ca;3ab_3ca;3ba_3cb;3bb_3cb;3aa_3cb;3ab_3cb;3ba_3da;3bb_3da;3aa_3da;3ab_3da;3ba_3gb;3bb_3gb;3aa_3gb;3ab_3gb;3bb_3eb;3aa_3eb;3ab_3eb;3bb_3fb;3aa_3fb;3ab_3fb;3bb_3ga;3aa_3ga;3ab_3ga;3bb_3ha;3aa_3ha;3ab_3ha;3bb_3ia;3aa_3ia;3ab_3ia;3aa_3ba;3ab_3ba	carnitine transmembrane transport [GO:1902603];in utero embryonic development [GO:0001701];lipid transport [GO:0006869];mitochondrial transport [GO:0006839]	cytosol [GO:0005829];mitochondrial envelope [GO:0005740];mitochondrial inner membrane [GO:0005743];mitochondrion [GO:0005739]	acyl carnitine transmembrane transporter activity [GO:0015227]	cytosol [GO:0005829];mitochondrial envelope [GO:0005740];mitochondrial inner membrane [GO:0005743];mitochondrion [GO:0005739];acyl carnitine transmembrane transporter activity [GO:0015227];carnitine transmembrane transport [GO:1902603];in utero embryonic development [GO:0001701];lipid transport [GO:0006869];mitochondrial transport [GO:0006839]	GO:0001701;GO:0005739;GO:0005740;GO:0005743;GO:0005829;GO:0006839;GO:0006869;GO:0015227;GO:1902603
0.15901	1.36555	1.22187	0.133215	0.0864105	0.026927	0.278728	0.123841	0.131846	-0.0125914	0.256882	0.0870152	1.51098	2.27448	0.715443	1.16313	Aminotran_5	+	16.8726	0	Q9Z1J3	Q9Z1J3	NFS1_MOUSE	Nfs1	Cysteine desulfurase	3aa_3da;3gb_3da;3fb_3da;3bb_3da;3ab_3da;3aa_3fa;3gb_3fa;3fb_3fa;3bb_3fa;3ab_3fa;3aa_ctrl;3gb_ctrl;3fb_ctrl;3bb_ctrl;3ab_ctrl;3aa_3eb;3gb_3eb;3fb_3eb;3bb_3eb;3ab_3eb;3aa_3ea;3gb_3ea;3fb_3ea;3bb_3ea;3ab_3ea;3aa_3ca;3gb_3ca;3fb_3ca;3bb_3ca;3ab_3ca;3aa_3ha;3gb_3ha;3fb_3ha;3bb_3ha;3ab_3ha;3aa_3ga;3gb_3ga;3fb_3ga;3bb_3ga;3ab_3ga;3aa_3cb;3gb_3cb;3fb_3cb;3bb_3cb;3ab_3cb;3gb_3ia;3fb_3ia;3bb_3ia;3ab_3ia;3f…	[2Fe-2S] cluster assembly [GO:0044571];[4Fe-4S] cluster assembly [GO:0044572];iron incorporation into metallo-sulfur cluster [GO:0018283];iron-sulfur cluster assembly [GO:0016226];Mo-molybdopterin cofactor biosynthetic process [GO:0006777];molybdopterin cofactor metabolic process [GO:0043545]	cytosol [GO:0005829];iron-sulfur cluster assembly complex [GO:1990229];mitochondrial iron-sulfur cluster assembly complex [GO:0099128];mitochondrial matrix [GO:0005759];mitochondrion [GO:0005739];nucleoplasm [GO:0005654];nucleus [GO:0005634]	cysteine desulfurase activity [GO:0031071];iron-sulfur cluster binding [GO:0051536];metal ion binding [GO:0046872];protein homodimerization activity [GO:0042803];pyridoxal phosphate binding [GO:0030170]	cytosol [GO:0005829];iron-sulfur cluster assembly complex [GO:1990229];mitochondrial iron-sulfur cluster assembly complex [GO:0099128];mitochondrial matrix [GO:0005759];mitochondrion [GO:0005739];nucleoplasm [GO:0005654];nucleus [GO:0005634];cysteine desulfurase activity [GO:0031071];iron-sulfur cluster binding [GO:0051536];metal ion binding [GO:0046872];protein homodimerization activity [GO:0042…	GO:0005634;GO:0005654;GO:0005739;GO:0005759;GO:0005829;GO:0006777;GO:0016226;GO:0018283;GO:0030170;GO:0031071;GO:0042803;GO:0043545;GO:0044571;GO:0044572;GO:0046872;GO:0051536;GO:0099128;GO:1990229	2.8.1.7
-0.141921	1.15266	0.98698	0.0576525	0.570586	0.322273	0.387341	0.565187	0.197991	0.0249901	1.21681	0.285137	1.7044	1.55695	0.785026	1.75114	Glutaredoxin	+	6.8105	0.000307692	Q80Y14	Q80Y14	GLRX5_MOUSE	Glrx5	Glutaredoxin-related protein 5, mitochondrial	3bb_ctrl;3ab_ctrl;3aa_ctrl;3bb_3ha;3ab_3ha;3aa_3ha;3bb_3fa;3ab_3fa;3aa_3fa;3bb_3da;3ab_3da;3aa_3da;3bb_3ia;3ab_3ia;3aa_3ia;3bb_3ca;3ab_3ca;3aa_3ca;3bb_3ea;3ab_3ea;3aa_3ea;3aa_3db	[2Fe-2S] cluster assembly [GO:0044571];hemopoiesis [GO:0030097];protein maturation by [2Fe-2S] cluster transfer [GO:0106034];protein maturation by [4Fe-4S] cluster transfer [GO:0106035]	dendrite [GO:0030425];iron-sulfur cluster assembly complex [GO:1990229];mitochondrial matrix [GO:0005759];mitochondrion [GO:0005739];neuronal cell body [GO:0043025];nucleus [GO:0005634]	2 iron, 2 sulfur cluster binding [GO:0051537];metal ion binding [GO:0046872]	dendrite [GO:0030425];iron-sulfur cluster assembly complex [GO:1990229];mitochondrial matrix [GO:0005759];mitochondrion [GO:0005739];neuronal cell body [GO:0043025];nucleus [GO:0005634];2 iron, 2 sulfur cluster binding [GO:0051537];metal ion binding [GO:0046872];[2Fe-2S] cluster assembly [GO:0044571];hemopoiesis [GO:0030097];protein maturation by [2Fe-2S] cluster transfer [GO:0106034];protein mat…	GO:0005634;GO:0005739;GO:0005759;GO:0030097;GO:0030425;GO:0043025;GO:0044571;GO:0046872;GO:0051537;GO:0106034;GO:0106035;GO:1990229
0.168321	0.70576	0.629302	0.453753	0.071928	-0.0480194	0.701226	0.609778	0.502933	0.711997	0.681087	0.251143	1.36396	0.692903	1.03395	0.768966	p450	+	4.8705	0.00464516	Q64464	Q64464	CP3AD_MOUSE	Cyp3a13	Cytochrome P450 3A13	3ba_3ea;3bb_3ea;3ba_ctrl;3bb_ctrl;3ba_3eb;3bb_3eb;3bb_3fa;3bb_3ha	alkaloid catabolic process [GO:0009822];estrogen metabolic process [GO:0008210];lipid hydroxylation [GO:0002933];oxidative demethylation [GO:0070989];positive regulation of gene expression [GO:0010628];retinoic acid metabolic process [GO:0042573];steroid metabolic process [GO:0008202];xenobiotic catabolic process [GO:0042178]	cytoplasm [GO:0005737];endoplasmic reticulum membrane [GO:0005789]	1-alpha,25-dihydroxyvitamin D3 23-hydroxylase activity [GO:0062181];aromatase activity [GO:0070330];caffeine oxidase activity [GO:0034875];enzyme binding [GO:0019899];estrogen 16-alpha-hydroxylase activity [GO:0101020];estrogen 2-hydroxylase activity [GO:0101021];heme binding [GO:0020037];iron ion binding [GO:0005506];monooxygenase activity [GO:0004497];oxidoreductase activity [GO:0016491];retino…	cytoplasm [GO:0005737];endoplasmic reticulum membrane [GO:0005789];1-alpha,25-dihydroxyvitamin D3 23-hydroxylase activity [GO:0062181];aromatase activity [GO:0070330];caffeine oxidase activity [GO:0034875];enzyme binding [GO:0019899];estrogen 16-alpha-hydroxylase activity [GO:0101020];estrogen 2-hydroxylase activity [GO:0101021];heme binding [GO:0020037];iron ion binding [GO:0005506];monooxygenas…	GO:0002933;GO:0004497;GO:0005496;GO:0005506;GO:0005737;GO:0005789;GO:0008202;GO:0008210;GO:0008395;GO:0008401;GO:0009822;GO:0010628;GO:0016491;GO:0019899;GO:0020037;GO:0030343;GO:0034875;GO:0042178;GO:0042573;GO:0050649;GO:0062181;GO:0070330;GO:0070576;GO:0070989;GO:0101020;GO:0101021	1.14.14.1
0.261875	0.826046	0.153229	0.113001	0.0175467	0.403021	0.293398	0.709578	0.701002	0.423094	0.26919	0.384846	1.47309	0.995153	1.06634	0.951334	Ald_Xan_dh_C;Ald_Xan_dh_C2;CO_deh_flav_C;FAD_binding_5;Fer2;Fer2_2	+	10.4282	0	Q00519	Q00519	XDH_MOUSE	Xdh	Xanthine dehydrogenase/oxidase	3cb_ctrl;3ab_ctrl;3aa_ctrl;3ba_ctrl;3bb_ctrl;3ab_3eb;3aa_3eb;3ba_3eb;3bb_3eb;3ab_3ia;3aa_3ia;3ba_3ia;3bb_3ia;3ab_3gb;3aa_3gb;3ba_3gb;3bb_3gb;3ab_3ha;3aa_3ha;3ba_3ha;3bb_3ha;3aa_3ga;3ba_3ga;3bb_3ga;3ba_3db;3bb_3db;3bb_3da;3bb_3fa;3bb_3ea	activation of cysteine-type endopeptidase activity involved in apoptotic process [GO:0006919];adenosine catabolic process [GO:0006154];allantoin metabolic process [GO:0000255];amide catabolic process [GO:0043605];AMP catabolic process [GO:0006196];dAMP catabolic process [GO:0046059];deoxyadenosine catabolic process [GO:0006157];deoxyguanosine catabolic process [GO:0006161];deoxyinosine catabolic …	cytosol [GO:0005829];extracellular space [GO:0005615];peroxisome [GO:0005777];sarcoplasmic reticulum [GO:0016529]	2 iron, 2 sulfur cluster binding [GO:0051537];FAD binding [GO:0071949];flavin adenine dinucleotide binding [GO:0050660];hypoxanthine dehydrogenase activity [GO:0070674];hypoxanthine oxidase activity [GO:0070675];identical protein binding [GO:0042802];iron ion binding [GO:0005506];molybdenum ion binding [GO:0030151];molybdopterin cofactor binding [GO:0043546];nitrite reductase (NO-forming) activit…	cytosol [GO:0005829];extracellular space [GO:0005615];peroxisome [GO:0005777];sarcoplasmic reticulum [GO:0016529];2 iron, 2 sulfur cluster binding [GO:0051537];FAD binding [GO:0071949];flavin adenine dinucleotide binding [GO:0050660];hypoxanthine dehydrogenase activity [GO:0070674];hypoxanthine oxidase activity [GO:0070675];identical protein binding [GO:0042802];iron ion binding [GO:0005506];moly…	GO:0000255;GO:0001933;GO:0001937;GO:0004854;GO:0004855;GO:0005506;GO:0005615;GO:0005777;GO:0005829;GO:0006147;GO:0006148;GO:0006149;GO:0006154;GO:0006157;GO:0006161;GO:0006196;GO:0006204;GO:0006919;GO:0007595;GO:0009114;GO:0009115;GO:0010044;GO:0010629;GO:0016226;GO:0016491;GO:0016529;GO:0030151;GO:0030856;GO:0042802;GO:0042803;GO:0043546;GO:0043605;GO:0045602;GO:0046038;GO:0046055;GO:0046059;GO:…	1.17.1.4;1.17.3.2
0.776251	0.89724	1.99563	0.694613	-0.0400152	0.390602	0.233083	0.46569	0.331114	0.264933	1.48674	0.312763	1.50962	0.850456	0.361841	0.469818	Flavodoxin_2	+	4.14363	0.0127222	Q64669	Q64669	NQO1_MOUSE	Nqo1	NAD(P)H dehydrogenase [quinone] 1	3gb_3db;3gb_3eb;3gb_ctrl;3gb_3ca;3gb_3da;3gb_3cb;3gb_3ea;3gb_3fa;3gb_3ba;3gb_3ha;3gb_3aa	aging [GO:0007568];cell redox homeostasis [GO:0045454];cellular response to hydrogen peroxide [GO:0070301];cellular response to metal ion [GO:0071248];cellular response to oxidative stress [GO:0034599];innate immune response [GO:0045087];NADH oxidation [GO:0006116];NADPH oxidation [GO:0070995];negative regulation of apoptotic process [GO:0043066];negative regulation of catalytic activity [GO:0043…	cytoplasm [GO:0005737];cytosol [GO:0005829];dendrite [GO:0030425];neuronal cell body [GO:0043025];nucleus [GO:0005634]	identical protein binding [GO:0042802];NAD(P)H dehydrogenase (quinone) activity [GO:0003955];NADH dehydrogenase (quinone) activity [GO:0050136];NADPH dehydrogenase (quinone) activity [GO:0008753];superoxide dismutase activity [GO:0004784]	cytoplasm [GO:0005737];cytosol [GO:0005829];dendrite [GO:0030425];neuronal cell body [GO:0043025];nucleus [GO:0005634];identical protein binding [GO:0042802];NAD(P)H dehydrogenase (quinone) activity [GO:0003955];NADH dehydrogenase (quinone) activity [GO:0050136];NADPH dehydrogenase (quinone) activity [GO:0008753];superoxide dismutase activity [GO:0004784];aging [GO:0007568];cell redox homeostasis…	GO:0000209;GO:0002931;GO:0003955;GO:0004784;GO:0005634;GO:0005737;GO:0005829;GO:0006116;GO:0006743;GO:0006801;GO:0006979;GO:0007568;GO:0007584;GO:0008753;GO:0009410;GO:0009725;GO:0009743;GO:0014075;GO:0019430;GO:0030163;GO:0030425;GO:0032355;GO:0032496;GO:0033574;GO:0034599;GO:0042177;GO:0042360;GO:0042373;GO:0042802;GO:0043025;GO:0043066;GO:0043086;GO:0043279;GO:0043525;GO:0045087;GO:0045454;GO:…	1.6.5.2
0.807809	1.36714	1.55673	0.961711	-0.293004	-0.0349531	-0.495157	-0.0634212	0.158748	-0.0389166	1.52754	1.12108	0.19533	0.171527	0.397798	0.536695	Amino_oxidase	+	6.10157	0.001	Q64133	Q64133	AOFA_MOUSE	Maoa	Amine oxidase [flavin-containing] A	3gb_3ea;3fb_3ea;3ga_3ea;3gb_3eb;3fb_3eb;3ga_3eb;3gb_3db;3fb_3db;3ga_3db;3fb_3ca;3ga_3ca;3fb_3cb;3ga_3cb;3fb_3bb;3ga_3bb;3ga_3da;3ga_ctrl	dopamine catabolic process [GO:0042420];neurotransmitter catabolic process [GO:0042135];phenylethylamine metabolic process [GO:0042443];positive regulation of signal transduction [GO:0009967];serotonin metabolic process [GO:0042428]	cytosol [GO:0005829];mitochondrial outer membrane [GO:0005741];mitochondrion [GO:0005739]	aliphatic amine oxidase activity [GO:0052595];flavin adenine dinucleotide binding [GO:0050660];monoamine oxidase activity [GO:0097621];phenethylamine:oxygen oxidoreductase (deaminating) activity [GO:0052596];primary amine oxidase activity [GO:0008131];serotonin binding [GO:0051378]	cytosol [GO:0005829];mitochondrial outer membrane [GO:0005741];mitochondrion [GO:0005739];aliphatic amine oxidase activity [GO:0052595];flavin adenine dinucleotide binding [GO:0050660];monoamine oxidase activity [GO:0097621];phenethylamine:oxygen oxidoreductase (deaminating) activity [GO:0052596];primary amine oxidase activity [GO:0008131];serotonin binding [GO:0051378];dopamine catabolic process…	GO:0005739;GO:0005741;GO:0005829;GO:0008131;GO:0009967;GO:0042135;GO:0042420;GO:0042428;GO:0042443;GO:0050660;GO:0051378;GO:0052595;GO:0052596;GO:0097621	1.4.3.21;1.4.3.4
1.60958	0.867186	0.63867	1.11914	-0.0148201	0.146523	0.369628	0.30894	0.2026	0.261768	2.02771	1.26462	0.247946	0.0779095	0.16176	0.407885	RPE65	+	6.94146	0.000216216	Q99NF1	Q99NF1	BCDO2_MOUSE	Bco2	Carotenoid-cleaving dioxygenase, mitochondrial	3fa_3ea;3ha_3ea;3ga_3ea;3ha_3ab;3ga_3ab;3ha_3eb;3ga_3eb;3ha_ctrl;3ga_ctrl;3ha_3bb;3ga_3bb;3ha_3da;3ga_3da;3ha_3ca;3ga_3ca;3ha_3cb;3ga_3cb;3ga_3ba;3ga_3aa;3ga_3db;3ga_3gb	carotene catabolic process [GO:0016121];carotene metabolic process [GO:0016119];carotenoid metabolic process [GO:0016116];lutein catabolic process [GO:0062172];lycopene catabolic process [GO:1901176];regulation of mitochondrial membrane potential [GO:0051881];regulation of reactive oxygen species metabolic process [GO:2000377];retinal metabolic process [GO:0042574];retinoic acid metabolic process…	mitochondrion [GO:0005739]	9,10 (9', 10')-carotenoid-cleaving dioxygenase activity [GO:0010437];beta,beta-carotene-9',10'-cleaving oxygenase activity [GO:0102076];beta-carotene 15,15'-dioxygenase activity [GO:0003834];carotenoid dioxygenase activity [GO:0010436];metal ion binding [GO:0046872];oxidoreductase activity, acting on single donors with incorporation of molecular oxygen, incorporation of two atoms of oxygen [GO:00…	mitochondrion [GO:0005739];9,10 (9', 10')-carotenoid-cleaving dioxygenase activity [GO:0010437];beta,beta-carotene-9',10'-cleaving oxygenase activity [GO:0102076];beta-carotene 15,15'-dioxygenase activity [GO:0003834];carotenoid dioxygenase activity [GO:0010436];metal ion binding [GO:0046872];oxidoreductase activity, acting on single donors with incorporation of molecular oxygen, incorporation of…	GO:0003834;GO:0005739;GO:0010436;GO:0010437;GO:0016116;GO:0016119;GO:0016121;GO:0016122;GO:0016124;GO:0016702;GO:0042573;GO:0042574;GO:0046872;GO:0051881;GO:0062172;GO:0102076;GO:1901176;GO:1901826;GO:2000377	1.13.11.-;1.13.11.71
0.335504	0.742804	0.799055	0.636205	0.309126	-0.126979	0.543366	0.708366	0.690042	1.88097	1.82693	1.16954	0.513824	0.136308	0.598306	0.486863	DAO;EF-hand_7	+	7.18839	0.000125	Q64521	Q64521	GPDM_MOUSE	Gpd2	Glycerol-3-phosphate dehydrogenase, mitochondrial	3ca_3ea;3fa_3ea;3ga_3ea;3da_3ea;3ga_ctrl;3da_ctrl;3ga_3eb;3da_3eb;3ga_3ab;3da_3ab;3ga_3ha;3da_3ha;3ga_3db;3da_3db;3ga_3bb;3da_3bb;3ga_3ia;3da_3ia;3da_3aa;3da_3cb;3da_3ba	camera-type eye development [GO:0043010];gluconeogenesis [GO:0006094];glycerol catabolic process [GO:0019563];glycerol-3-phosphate metabolic process [GO:0006072];multicellular organism growth [GO:0035264];NADH metabolic process [GO:0006734]	glycerol-3-phosphate dehydrogenase complex [GO:0009331];mitochondrial inner membrane [GO:0005743];mitochondrion [GO:0005739]	calcium ion binding [GO:0005509];glycerol-3-phosphate dehydrogenase (quinone) activity [GO:0004368];glycerol-3-phosphate dehydrogenase [NAD(P)+] activity [GO:0047952];sn-glycerol-3-phosphate:ubiquinone-8 oxidoreductase activity [GO:0052591]	glycerol-3-phosphate dehydrogenase complex [GO:0009331];mitochondrial inner membrane [GO:0005743];mitochondrion [GO:0005739];calcium ion binding [GO:0005509];glycerol-3-phosphate dehydrogenase (quinone) activity [GO:0004368];glycerol-3-phosphate dehydrogenase [NAD(P)+] activity [GO:0047952];sn-glycerol-3-phosphate:ubiquinone-8 oxidoreductase activity [GO:0052591];camera-type eye development [GO:0…	GO:0004368;GO:0005509;GO:0005739;GO:0005743;GO:0006072;GO:0006094;GO:0006734;GO:0009331;GO:0019563;GO:0035264;GO:0043010;GO:0047952;GO:0052591	1.1.5.3
0.5453	0.747634	0.888149	0.654845	-0.0428162	-0.131462	0.429814	0.530034	0.785539	1.05173	1.03965	0.39497	0.789948	0.145283	0.50574	0.41173	p450	+	3.9652	0.0162133	P24457	P24457	CP2DB_MOUSE	Cyp2d11	Cytochrome P450 2D11	3da_ctrl;3ga_ctrl;3da_3ea;3ga_3ea;3da_3eb;3ga_3eb;3ga_3ab	arachidonic acid metabolic process [GO:0019369];xenobiotic metabolic process [GO:0006805]	cytoplasm [GO:0005737];endoplasmic reticulum membrane [GO:0005789];intracellular membrane-bounded organelle [GO:0043231];mitochondrion [GO:0005739]	anandamide 11,12 epoxidase activity [GO:0062188];anandamide 14,15 epoxidase activity [GO:0062189];anandamide 8,9 epoxidase activity [GO:0062187];aromatase activity [GO:0070330];heme binding [GO:0020037];iron ion binding [GO:0005506];monooxygenase activity [GO:0004497];oxidoreductase activity [GO:0016491];oxidoreductase activity, acting on paired donors, with incorporation or reduction of molecula…	cytoplasm [GO:0005737];endoplasmic reticulum membrane [GO:0005789];intracellular membrane-bounded organelle [GO:0043231];mitochondrion [GO:0005739];anandamide 11,12 epoxidase activity [GO:0062188];anandamide 14,15 epoxidase activity [GO:0062189];anandamide 8,9 epoxidase activity [GO:0062187];aromatase activity [GO:0070330];heme binding [GO:0020037];iron ion binding [GO:0005506];monooxygenase acti…	GO:0004497;GO:0005506;GO:0005737;GO:0005739;GO:0005789;GO:0006805;GO:0016491;GO:0016712;GO:0019369;GO:0020037;GO:0043231;GO:0062187;GO:0062188;GO:0062189;GO:0070330	1.14.14.1
0.949025	1.14311	0.416633	0.21691	-0.211971	0.24495	0.750926	1.26893	1.40482	1.46065	0.852712	1.06681	0.739988	0.801246	0.651361	1.07009	p450	+	4.74	0.0055625	Q9JKJ9	Q9JKJ9	CP39A_MOUSE	Cyp39a1	24-hydroxycholesterol 7-alpha-hydroxylase	3cb_3eb;3fb_3eb;3da_3eb;3ca_3eb;3cb_ctrl;3da_ctrl;3ca_ctrl;3da_3ea;3ca_3ea	bile acid biosynthetic process [GO:0006699];bile acid catabolic process [GO:0030573];cholesterol catabolic process [GO:0006707];cholesterol homeostasis [GO:0042632];digestion [GO:0007586]	endoplasmic reticulum membrane [GO:0005789];intracellular membrane-bounded organelle [GO:0043231]	24-hydroxycholesterol 7alpha-hydroxylase activity [GO:0033782];heme binding [GO:0020037];iron ion binding [GO:0005506];oxysterol 7-alpha-hydroxylase activity [GO:0008396];steroid 7-alpha-hydroxylase activity [GO:0008387]	endoplasmic reticulum membrane [GO:0005789];intracellular membrane-bounded organelle [GO:0043231];24-hydroxycholesterol 7alpha-hydroxylase activity [GO:0033782];heme binding [GO:0020037];iron ion binding [GO:0005506];oxysterol 7-alpha-hydroxylase activity [GO:0008396];steroid 7-alpha-hydroxylase activity [GO:0008387];bile acid biosynthetic process [GO:0006699];bile acid catabolic process [GO:0030…	GO:0005506;GO:0005789;GO:0006699;GO:0006707;GO:0007586;GO:0008387;GO:0008396;GO:0020037;GO:0030573;GO:0033782;GO:0042632;GO:0043231	1.14.14.26
0.692141	0.940936	0.865919	0.42152	0.238706	0.282407	0.898328	0.818364	1.02489	1.22309	1.12771	0.526065	0.948138	0.595401	0.953641	1.09858	p450	+	7.44297	0	O09158	O09158	CP3AP_MOUSE	Cyp3a25	Cytochrome P450 3A25	3ab_ctrl;3db_ctrl;3cb_ctrl;3gb_ctrl;3ba_ctrl;3aa_ctrl;3fb_ctrl;3bb_ctrl;3ca_ctrl;3ga_ctrl;3da_ctrl;3aa_3eb;3fb_3eb;3bb_3eb;3ca_3eb;3ga_3eb;3da_3eb;3aa_3ea;3fb_3ea;3bb_3ea;3ca_3ea;3ga_3ea;3da_3ea;3da_3ia	oxidative demethylation [GO:0070989];response to bacterium [GO:0009617]	endoplasmic reticulum membrane [GO:0005789]	aromatase activity [GO:0070330];estrogen 16-alpha-hydroxylase activity [GO:0101020];estrogen 2-hydroxylase activity [GO:0101021];heme binding [GO:0020037];iron ion binding [GO:0005506];retinoic acid 4-hydroxylase activity [GO:0008401];steroid hydroxylase activity [GO:0008395];testosterone 16-alpha-hydroxylase activity [GO:0008390];testosterone 6-beta-hydroxylase activity [GO:0050649]	endoplasmic reticulum membrane [GO:0005789];aromatase activity [GO:0070330];estrogen 16-alpha-hydroxylase activity [GO:0101020];estrogen 2-hydroxylase activity [GO:0101021];heme binding [GO:0020037];iron ion binding [GO:0005506];retinoic acid 4-hydroxylase activity [GO:0008401];steroid hydroxylase activity [GO:0008395];testosterone 16-alpha-hydroxylase activity [GO:0008390];testosterone 6-beta-hy…	GO:0005506;GO:0005789;GO:0008390;GO:0008395;GO:0008401;GO:0009617;GO:0020037;GO:0050649;GO:0070330;GO:0070989;GO:0101020;GO:0101021	1.14.14.1
1.57698	0.706154	0.802305	1.18404	-0.102245	0.028511	0.400958	0.774116	1.36506	1.35796	1.36224	0.949465	0.88068	0.282255	1.06011	1.44927	Heme_oxygenase	+	5.91137	0.00128	O70252	O70252	HMOX2_MOUSE	Hmox2	Heme oxygenase 2	3ca_3eb;3da_3eb;3ga_3eb;3ha_3eb;3aa_3eb;3ca_3ea;3da_3ea;3ga_3ea;3ha_3ea;3aa_3ea;3ca_ctrl;3da_ctrl;3ga_ctrl;3ha_ctrl;3aa_ctrl	heme catabolic process [GO:0042167];heme oxidation [GO:0006788];response to hypoxia [GO:0001666];response to oxidative stress [GO:0006979]	endoplasmic reticulum membrane [GO:0005789];plasma membrane [GO:0005886]	heme binding [GO:0020037];heme oxygenase (decyclizing) activity [GO:0004392];metal ion binding [GO:0046872]	endoplasmic reticulum membrane [GO:0005789];plasma membrane [GO:0005886];heme binding [GO:0020037];heme oxygenase (decyclizing) activity [GO:0004392];metal ion binding [GO:0046872];heme catabolic process [GO:0042167];heme oxidation [GO:0006788];response to hypoxia [GO:0001666];response to oxidative stress [GO:0006979]	GO:0001666;GO:0004392;GO:0005789;GO:0005886;GO:0006788;GO:0006979;GO:0020037;GO:0042167;GO:0046872	1.14.14.18
1.00359	0.526991	0.300025	0.948613	0.352967	0.256934	0.255729	0.302175	1.22486	1.41154	1.01508	0.794521	-0.133602	-0.138203	0.939779	1.0972	zf-CDGSH	+	3.5462	0.0290337	B1AR13	B1AR13	CISD3_MOUSE	Cisd3	CDGSH iron-sulfur domain-containing protein 3, mitochondrial		protein maturation by [2Fe-2S] cluster transfer [GO:0106034]	mitochondrion [GO:0005739]	2 iron, 2 sulfur cluster binding [GO:0051537];metal ion binding [GO:0046872]	mitochondrion [GO:0005739];2 iron, 2 sulfur cluster binding [GO:0051537];metal ion binding [GO:0046872];protein maturation by [2Fe-2S] cluster transfer [GO:0106034]	GO:0005739;GO:0046872;GO:0051537;GO:0106034
-0.0120964	-0.0457077	-0.0770912	2.77964	0.0829277	-0.0261745	0.0263252	-0.0673599	0.0669823	-0.0334053	1.03733	-0.100603	-0.0138092	-0.0418606	0.079525	-0.0268097	CRAL_TRIO;CRAL_TRIO_N	+	16.1074	0	Q99J08	Q99J08	S14L2_MOUSE	Sec14l2	SEC14-like protein 2	3ga_3fa;3ia_3fa;3ga_3gb;3ia_3gb;3ga_3da;3ia_3da;3ga_3ab;3ia_3ab;3ga_3bb;3ia_3bb;3ga_3fb;3ia_3fb;3ga_3cb;3ia_3cb;3ga_3ha;3ia_3ha;3ga_3ea;3ia_3ea;3ga_3ca;3ia_3ca;3ga_3aa;3ia_3aa;3ga_ctrl;3ia_ctrl;3ga_3db;3ia_3db;3ga_3ba;3ia_3ba;3ga_3eb;3ia_3eb;3ia_3ga	positive regulation of cholesterol biosynthetic process [GO:0045542]	cytoplasm [GO:0005737];cytosol [GO:0005829];nucleoplasm [GO:0005654]	enzyme activator activity [GO:0008047];lipid binding [GO:0008289];transferase activity, transferring alkyl or aryl (other than methyl) groups [GO:0016765]	cytoplasm [GO:0005737];cytosol [GO:0005829];nucleoplasm [GO:0005654];enzyme activator activity [GO:0008047];lipid binding [GO:0008289];transferase activity, transferring alkyl or aryl (other than methyl) groups [GO:0016765];positive regulation of cholesterol biosynthetic process [GO:0045542]	GO:0005654;GO:0005737;GO:0005829;GO:0008047;GO:0008289;GO:0016765;GO:0045542
0.318184	1.46478	1.46251	0.462564	-0.269614	-0.0812683	0.618046	0.746799	0.213989	0.348843	0.981321	0.694754	0.23753	0.0487423	0.0966187	0.266648	F420_oxidored;Ferric_reduct	+	7.87128	0	Q923B6	Q923B6	STEA4_MOUSE	Steap4	Metalloreductase STEAP4	3ga_3eb;3gb_3eb;3fb_3eb;3ga_3ea;3gb_3ea;3fb_3ea;3ga_ctrl;3gb_ctrl;3fb_ctrl;3gb_3ca;3fb_3ca;3gb_3ba;3fb_3ba;3gb_3ab;3fb_3ab;3gb_3bb;3fb_3bb;3gb_3aa;3fb_3aa;3gb_3ia;3fb_3ia;3fb_3ha;3fb_3da	copper ion import [GO:0015677];fat cell differentiation [GO:0045444];iron import into cell [GO:0033212];iron ion import across cell outer membrane [GO:0098706];protein homotrimerization [GO:0070207]	early endosome membrane [GO:0031901];endosome [GO:0005768];Golgi membrane [GO:0000139];membrane [GO:0016020];nucleoplasm [GO:0005654];plasma membrane [GO:0005886]	cupric reductase activity [GO:0008823];electron transfer activity [GO:0009055];FAD binding [GO:0071949];ferric-chelate reductase (NADPH) activity [GO:0052851];heme binding [GO:0020037];metal ion binding [GO:0046872]	early endosome membrane [GO:0031901];endosome [GO:0005768];Golgi membrane [GO:0000139];membrane [GO:0016020];nucleoplasm [GO:0005654];plasma membrane [GO:0005886];cupric reductase activity [GO:0008823];electron transfer activity [GO:0009055];FAD binding [GO:0071949];ferric-chelate reductase (NADPH) activity [GO:0052851];heme binding [GO:0020037];metal ion binding [GO:0046872];copper ion import [G…	GO:0000139;GO:0005654;GO:0005768;GO:0005886;GO:0008823;GO:0009055;GO:0015677;GO:0016020;GO:0020037;GO:0031901;GO:0033212;GO:0045444;GO:0046872;GO:0052851;GO:0070207;GO:0071949;GO:0098706	1.16.1.9
0.581095	2.37268	1.37139	-0.108931	0.161893	0.658104	1.00559	1.10617	0.77112	0.50415	0.0714893	0.787043	0.6651	0.2472	-0.0942402	0.0481377	Complex1_51K;NADH_4Fe-4S;SLBB	+	7.81489	0	Q91YT0	Q91YT0	NDUV1_MOUSE	Ndufv1	NADH dehydrogenase [ubiquinone] flavoprotein 1, mitochondrial	3gb_3ia;3fb_3ia;3gb_3ba;3fb_3ba;3gb_ctrl;3fb_ctrl;3fb_3ga;3fb_3eb;3fb_3aa;3fb_3ab;3fb_3da;3fb_3ea;3fb_3ha;3fb_3bb;3fb_3ca;3fb_3fa;3fb_3cb	aerobic respiration [GO:0009060];mitochondrial ATP synthesis coupled electron transport [GO:0042775];mitochondrial electron transport, NADH to ubiquinone [GO:0006120];proton motive force-driven mitochondrial ATP synthesis [GO:0042776]	cytosol [GO:0005829];mitochondrial inner membrane [GO:0005743];mitochondrial respiratory chain complex I [GO:0005747];mitochondrion [GO:0005739]	4 iron, 4 sulfur cluster binding [GO:0051539];FMN binding [GO:0010181];metal ion binding [GO:0046872];NAD binding [GO:0051287];NADH dehydrogenase (ubiquinone) activity [GO:0008137]	cytosol [GO:0005829];mitochondrial inner membrane [GO:0005743];mitochondrial respiratory chain complex I [GO:0005747];mitochondrion [GO:0005739];4 iron, 4 sulfur cluster binding [GO:0051539];FMN binding [GO:0010181];metal ion binding [GO:0046872];NAD binding [GO:0051287];NADH dehydrogenase (ubiquinone) activity [GO:0008137];aerobic respiration [GO:0009060];mitochondrial ATP synthesis coupled elec…	GO:0005739;GO:0005743;GO:0005747;GO:0005829;GO:0006120;GO:0008137;GO:0009060;GO:0010181;GO:0042775;GO:0042776;GO:0046872;GO:0051287;GO:0051539	7.1.1.2
0.0626144	1.28881	1.53495	0.141218	0.0420227	0.16202	0.556175	0.592611	0.137018	0.384003	0.344004	0.0478745	1.57983	0.721329	0.192698	0.317505	MitoNEET_N;zf-CDGSH	+	4.10086	0.0134795	Q91WS0	Q91WS0	CISD1_MOUSE	Cisd1	CDGSH iron-sulfur domain-containing protein 1	3fb_3fa;3bb_3fa;3gb_3fa;3gb_3eb;3bb_3ha;3gb_3ha;3bb_3ea;3gb_3ea	protein maturation by [2Fe-2S] cluster transfer [GO:0106034];regulation of autophagy [GO:0010506];regulation of cellular respiration [GO:0043457]	cytoplasmic side of mitochondrial outer membrane [GO:0032473];mitochondrial outer membrane [GO:0005741];mitochondrion [GO:0005739]	2 iron, 2 sulfur cluster binding [GO:0051537];identical protein binding [GO:0042802];iron ion binding [GO:0005506];L-cysteine transaminase activity [GO:0047801];protein homodimerization activity [GO:0042803];pyridoxal phosphate binding [GO:0030170]	cytoplasmic side of mitochondrial outer membrane [GO:0032473];mitochondrial outer membrane [GO:0005741];mitochondrion [GO:0005739];2 iron, 2 sulfur cluster binding [GO:0051537];identical protein binding [GO:0042802];iron ion binding [GO:0005506];L-cysteine transaminase activity [GO:0047801];protein homodimerization activity [GO:0042803];pyridoxal phosphate binding [GO:0030170];protein maturation …	GO:0005506;GO:0005739;GO:0005741;GO:0010506;GO:0030170;GO:0032473;GO:0042802;GO:0042803;GO:0043457;GO:0047801;GO:0051537;GO:0106034	2.6.1.3
0.0554771	1.49795	1.91448	-0.0426874	0.111018	0.163304	-0.0458183	-0.148973	-0.0454245	-0.0109682	-0.0131407	0.107	0.680021	0.545575	0.0917587	-0.0811815	Pterin_4a	+	12.5214	0	Q9CZL5	Q9CZL5	PHS2_MOUSE	Pcbd2	Pterin-4-alpha-carbinolamine dehydratase 2	3fb_3ia;3gb_3ia;3fb_3cb;3gb_3cb;3fb_3eb;3gb_3eb;3fb_3db;3gb_3db;3fb_ctrl;3gb_ctrl;3fb_3ca;3gb_3ca;3fb_3da;3gb_3da;3fb_3ha;3gb_3ha;3fb_3aa;3gb_3aa;3fb_3ba;3gb_3ba;3fb_3ga;3gb_3ga;3fb_3fa;3gb_3fa;3fb_3ea;3gb_3ea;3gb_3ab;3gb_3bb	positive regulation of DNA-templated transcription [GO:0045893];tetrahydrobiopterin biosynthetic process [GO:0006729]	mitochondrion [GO:0005739];nucleus [GO:0005634]	4-alpha-hydroxytetrahydrobiopterin dehydratase activity [GO:0008124];identical protein binding [GO:0042802];phenylalanine 4-monooxygenase activity [GO:0004505]	mitochondrion [GO:0005739];nucleus [GO:0005634];4-alpha-hydroxytetrahydrobiopterin dehydratase activity [GO:0008124];identical protein binding [GO:0042802];phenylalanine 4-monooxygenase activity [GO:0004505];positive regulation of DNA-templated transcription [GO:0045893];tetrahydrobiopterin biosynthetic process [GO:0006729]	GO:0004505;GO:0005634;GO:0005739;GO:0006729;GO:0008124;GO:0042802;GO:0045893	4.2.1.96
0.433136	1.92154	0.699754	0.452898	-0.0124731	-0.0209484	-0.299267	-0.174688	-0.0428648	0.214334	-0.152639	0.331065	0.580088	0.994176	-0.0656052	0.10355	GIDA;GIDA_assoc_3	+	5.52416	0.002	Q923Z3	Q923Z3	MTO1_MOUSE	Mto1	Protein MTO1 homolog, mitochondrial	3fb_3eb;3fb_3ga;3fb_3db;3fb_3cb;3fb_3aa;3fb_ctrl;3fb_3ca;3fb_3ba;3fb_3ea;3fb_3da;3fb_3ha;3fb_3fa;3fb_3ia	mitochondrial tRNA wobble uridine modification [GO:0070899];tRNA methylation [GO:0030488];tRNA wobble uridine modification [GO:0002098]	cytosol [GO:0005829];mitochondrion [GO:0005739]	flavin adenine dinucleotide binding [GO:0050660]	cytosol [GO:0005829];mitochondrion [GO:0005739];flavin adenine dinucleotide binding [GO:0050660];mitochondrial tRNA wobble uridine modification [GO:0070899];tRNA methylation [GO:0030488];tRNA wobble uridine modification [GO:0002098]	GO:0002098;GO:0005739;GO:0005829;GO:0030488;GO:0050660;GO:0070899
2.64133	-0.169964	0.0784531	0.350562	-0.0585804	-0.142488	-0.0443316	-0.174214	-0.301826	-0.138518	0.163315	0.53179	-0.011775	0.0265551	0.0502167	0.267035	Str_synth	+	21.0538	0	Q9D7N9	Q9D7N9	APMAP_MOUSE	Apmap	Adipocyte plasma membrane-associated protein	3fa_3ca;3ha_3ca;3ha_3da;3ha_3ea;3ha_3cb;3ha_3eb;3ha_3db;3ha_3ab;3ha_ctrl;3ha_3fb;3ha_3ba;3ha_3bb;3ha_3gb;3ha_3ga;3ha_3aa;3ha_3ia;3ha_3fa	biosynthetic process [GO:0009058]	cell surface [GO:0009986];membrane [GO:0016020]	arylesterase activity [GO:0004064];strictosidine synthase activity [GO:0016844]	cell surface [GO:0009986];membrane [GO:0016020];arylesterase activity [GO:0004064];strictosidine synthase activity [GO:0016844];biosynthetic process [GO:0009058]	GO:0004064;GO:0009058;GO:0009986;GO:0016020;GO:0016844
2.11982	0.200958	-0.042408	0.389341	-0.0501261	-0.265358	-0.0971966	-0.0602846	-0.000164986	-0.00443077	0.417234	0.512506	0.0371647	-0.0748549	-0.14749	-0.0225182	NNMT_PNMT_TEMT	+	5.93979	0.00130612	O55239	O55239	NNMT_MOUSE	Nnmt	Nicotinamide N-methyltransferase	3ha_3eb;3ha_3gb;3ha_3ea;3ha_3ba;3ha_3db;3ha_3ab;3ha_3cb;3ha_3da;3ha_ctrl;3ha_3aa;3ha_3bb;3ha_3ca;3ha_3fb;3ha_3ga;3ha_3ia;3ha_3fa	animal organ regeneration [GO:0031100];methylation [GO:0032259];nicotinamide metabolic process [GO:0006769];positive regulation of gluconeogenesis [GO:0045722];positive regulation of protein deacetylation [GO:0090312];regulation of histone methylation [GO:0031060];response to organonitrogen compound [GO:0010243];response to xenobiotic stimulus [GO:0009410]	cytosol [GO:0005829]	nicotinamide N-methyltransferase activity [GO:0008112]	cytosol [GO:0005829];nicotinamide N-methyltransferase activity [GO:0008112];animal organ regeneration [GO:0031100];methylation [GO:0032259];nicotinamide metabolic process [GO:0006769];positive regulation of gluconeogenesis [GO:0045722];positive regulation of protein deacetylation [GO:0090312];regulation of histone methylation [GO:0031060];response to organonitrogen compound [GO:0010243];response …	GO:0005829;GO:0006769;GO:0008112;GO:0009410;GO:0010243;GO:0031060;GO:0031100;GO:0032259;GO:0045722;GO:0090312	2.1.1.1
2.17489	-0.467201	-0.738645	-0.558619	-0.0543442	-0.141794	0.311186	-0.457119	-0.187071	-0.555536	0.336439	1.79328	-0.188077	-0.636831	0.514502	1.07556	IPK	+	6.38538	0.00111628	Q6PD10	Q6PD10	IP6K1_MOUSE	Ip6k1	Inositol hexakisphosphate kinase 1	3fa_3gb;3ha_3gb;3fa_3ab;3ha_3ab;3fa_3da;3ha_3da;3fa_3ia;3ha_3ia;3fa_3fb;3ha_3fb;3fa_3ca;3ha_3ca;3fa_3eb;3ha_3eb;3fa_3bb;3ha_3bb;3ha_3ea;3ha_3cb;3ha_ctrl;3ha_3ga	inositol metabolic process [GO:0006020];inositol phosphate biosynthetic process [GO:0032958];negative regulation of cold-induced thermogenesis [GO:0120163];phosphatidylinositol phosphate biosynthetic process [GO:0046854];phosphorylation [GO:0016310]	cytoplasm [GO:0005737];cytosol [GO:0005829];fibrillar center [GO:0001650];nucleoplasm [GO:0005654];nucleus [GO:0005634]	ATP binding [GO:0005524];inositol hexakisphosphate 1-kinase activity [GO:0052723];inositol hexakisphosphate 3-kinase activity [GO:0052724];inositol hexakisphosphate 5-kinase activity [GO:0000832];inositol hexakisphosphate kinase activity [GO:0000828];inositol-1,3,4,5,6-pentakisphosphate kinase activity [GO:0000827]	cytoplasm [GO:0005737];cytosol [GO:0005829];fibrillar center [GO:0001650];nucleoplasm [GO:0005654];nucleus [GO:0005634];ATP binding [GO:0005524];inositol hexakisphosphate 1-kinase activity [GO:0052723];inositol hexakisphosphate 3-kinase activity [GO:0052724];inositol hexakisphosphate 5-kinase activity [GO:0000832];inositol hexakisphosphate kinase activity [GO:0000828];inositol-1,3,4,5,6-pentakisp…	GO:0000827;GO:0000828;GO:0000832;GO:0001650;GO:0005524;GO:0005634;GO:0005654;GO:0005737;GO:0005829;GO:0006020;GO:0016310;GO:0032958;GO:0046854;GO:0052723;GO:0052724;GO:0120163	2.7.4.21
-0.107328	-0.580423	-0.0473042	0.609873	-0.386099	-0.318426	-0.6359	-0.485905	-0.488123	-0.471979	0.132303	-0.415339	-0.511251	-0.474722	-0.223644	-0.42835	Apolipoprotein	+	3.24339	0.0491304	Q00623	Q00623	APOA1_MOUSE	Apoa1	Apolipoprotein A-I	3ga_3db;3ia_3db;3ia_3bb;3ia_3ca;3ia_3cb;3ia_3fb;3ia_3da;3ia_3fa;3ia_3ab	adrenal gland development [GO:0030325];animal organ regeneration [GO:0031100];blood vessel endothelial cell migration [GO:0043534];cholesterol biosynthetic process [GO:0006695];cholesterol efflux [GO:0033344];cholesterol homeostasis [GO:0042632];cholesterol import [GO:0070508];cholesterol metabolic process [GO:0008203];cholesterol transport [GO:0030301];endothelial cell proliferation [GO:0001935]…	cell surface [GO:0009986];cytoplasmic vesicle [GO:0031410];cytosol [GO:0005829];discoidal high-density lipoprotein particle [GO:0034365];endocytic vesicle [GO:0030139];extracellular region [GO:0005576];extracellular space [GO:0005615];high-density lipoprotein particle [GO:0034364];intermediate-density lipoprotein particle [GO:0034363];low-density lipoprotein particle [GO:0034362];nucleus [GO:0005…	amyloid-beta binding [GO:0001540];apolipoprotein A-I receptor binding [GO:0034191];apolipoprotein receptor binding [GO:0034190];chemorepellent activity [GO:0045499];cholesterol binding [GO:0015485];cholesterol transfer activity [GO:0120020];enzyme binding [GO:0019899];heat shock protein binding [GO:0031072];high-density lipoprotein particle binding [GO:0008035];high-density lipoprotein particle r…	cell surface [GO:0009986];cytoplasmic vesicle [GO:0031410];cytosol [GO:0005829];discoidal high-density lipoprotein particle [GO:0034365];endocytic vesicle [GO:0030139];extracellular region [GO:0005576];extracellular space [GO:0005615];high-density lipoprotein particle [GO:0034364];intermediate-density lipoprotein particle [GO:0034363];low-density lipoprotein particle [GO:0034362];nucleus [GO:0005…	GO:0001540;GO:0001932;GO:0001935;GO:0002719;GO:0005102;GO:0005319;GO:0005543;GO:0005576;GO:0005615;GO:0005634;GO:0005829;GO:0006644;GO:0006656;GO:0006695;GO:0007186;GO:0007229;GO:0008035;GO:0008203;GO:0008211;GO:0008289;GO:0009986;GO:0010804;GO:0010875;GO:0010903;GO:0015485;GO:0015914;GO:0018158;GO:0018206;GO:0019899;GO:0019915;GO:0030139;GO:0030300;GO:0030301;GO:0030325;GO:0031072;GO:0031100;GO:…
0.367022	0.672411	0.516109	-0.0590305	-0.0128584	0.0669613	-0.547885	0.0383654	0.232104	0.391161	0.709705	0.472052	-0.139785	0.192806	-0.171762	1.62901	VKOR	+	3.95214	0.0160519	Q6TEK5	Q6TEK5	VKORL_MOUSE	Vkorc1l1	Vitamin K epoxide reductase complex subunit 1-like protein 1	3aa_3bb;3aa_3db;3aa_ctrl;3aa_3ab;3aa_3ia;3aa_3ca;3aa_3ba;3aa_3cb;3aa_3ea;3aa_3eb;3aa_3gb;3aa_3da	cellular response to oxidative stress [GO:0034599];peptidyl-glutamic acid carboxylation [GO:0017187];vitamin K metabolic process [GO:0042373]	endoplasmic reticulum [GO:0005783];endoplasmic reticulum membrane [GO:0005789]	quinone binding [GO:0048038];vitamin-K-epoxide reductase (warfarin-sensitive) activity [GO:0047057]	endoplasmic reticulum [GO:0005783];endoplasmic reticulum membrane [GO:0005789];quinone binding [GO:0048038];vitamin-K-epoxide reductase (warfarin-sensitive) activity [GO:0047057];cellular response to oxidative stress [GO:0034599];peptidyl-glutamic acid carboxylation [GO:0017187];vitamin K metabolic process [GO:0042373]	GO:0005783;GO:0005789;GO:0017187;GO:0034599;GO:0042373;GO:0047057;GO:0048038	1.17.4.4
0.904092	-0.0561371	0.196854	0.624175	-0.191211	-0.372613	0.0336275	0.0731897	-0.0822515	0.180367	0.708798	0.362083	0.797127	0.808405	0.988784	1.76633	FMO-like	+	11.4997	0	P50285	P50285	FMO1_MOUSE	Fmo1	Flavin-containing monooxygenase 1	3bb_3ea;3ab_3ea;3ha_3ea;3ga_3ea;3ba_3ea;3aa_3ea;3ba_3eb;3aa_3eb;3ba_3fb;3aa_3fb;3ba_ctrl;3aa_ctrl;3aa_3ca;3aa_3db;3aa_3cb;3aa_3gb;3aa_3da;3aa_3fa;3aa_3ia;3aa_3bb;3aa_3ab;3aa_3ha;3aa_3ga;3aa_3ba	energy homeostasis [GO:0097009];NADPH oxidation [GO:0070995];negative regulation of fatty acid oxidation [GO:0046322];organic acid metabolic process [GO:0006082];response to lipopolysaccharide [GO:0032496];response to osmotic stress [GO:0006970];taurine biosynthetic process [GO:0042412];toxin metabolic process [GO:0009404];xenobiotic metabolic process [GO:0006805]	endoplasmic reticulum membrane [GO:0005789];intracellular membrane-bounded organelle [GO:0043231]	flavin adenine dinucleotide binding [GO:0050660];hypotaurine dehydrogenase activity [GO:0047822];monooxygenase activity [GO:0004497];N,N-dimethylaniline monooxygenase activity [GO:0004499];NADP binding [GO:0050661];trimethylamine monooxygenase activity [GO:0034899]	endoplasmic reticulum membrane [GO:0005789];intracellular membrane-bounded organelle [GO:0043231];flavin adenine dinucleotide binding [GO:0050660];hypotaurine dehydrogenase activity [GO:0047822];monooxygenase activity [GO:0004497];N,N-dimethylaniline monooxygenase activity [GO:0004499];NADP binding [GO:0050661];trimethylamine monooxygenase activity [GO:0034899];energy homeostasis [GO:0097009];NAD…	GO:0004497;GO:0004499;GO:0005789;GO:0006082;GO:0006805;GO:0006970;GO:0009404;GO:0032496;GO:0034899;GO:0042412;GO:0043231;GO:0046322;GO:0047822;GO:0050660;GO:0050661;GO:0070995;GO:0097009	1.14.13.148;1.14.13.8
0.785343	0.0530434	0.139202	1.24676	0.0756168	-0.058567	0.105431	0.0294819	0.201101	0.0956688	0.442749	0.0805664	0.396755	0.949739	1.03631	2.53456	adh_short	+	22.3419	0	O88451	O88451;Q9R092	RDH7_MOUSE	Rdh7	Retinol dehydrogenase 7	3ha_ctrl;3ab_ctrl;3ba_ctrl;3ia_ctrl;3aa_ctrl;3ha_3ea;3ab_3ea;3ba_3ea;3ia_3ea;3aa_3ea;3ha_3cb;3ab_3cb;3ba_3cb;3ia_3cb;3aa_3cb;3ha_3db;3ab_3db;3ba_3db;3ia_3db;3aa_3db;3ha_3fb;3ab_3fb;3ba_3fb;3ia_3fb;3aa_3fb;3ab_3eb;3ba_3eb;3ia_3eb;3aa_3eb;3ab_3da;3ba_3da;3ia_3da;3aa_3da;3ab_3fa;3ba_3fa;3ia_3fa;3aa_3fa;3ab_3gb;3ba_3gb;3ia_3gb;3aa_3gb;3ab_3ca;3ba_3ca;3ia_3ca;3aa_3ca;3aa_3bb;3aa_3ga;3aa_3ha;3aa_3ab;3a…	retinol metabolic process [GO:0042572];steroid metabolic process [GO:0008202]	endoplasmic reticulum [GO:0005783];intracellular membrane-bounded organelle [GO:0043231]	androstan-3-alpha,17-beta-diol dehydrogenase activity [GO:0047044];androsterone dehydrogenase activity [GO:0047023];catalytic activity [GO:0003824];NAD-retinol dehydrogenase activity [GO:0004745]	endoplasmic reticulum [GO:0005783];intracellular membrane-bounded organelle [GO:0043231];androstan-3-alpha,17-beta-diol dehydrogenase activity [GO:0047044];androsterone dehydrogenase activity [GO:0047023];catalytic activity [GO:0003824];NAD-retinol dehydrogenase activity [GO:0004745];retinol metabolic process [GO:0042572];steroid metabolic process [GO:0008202]	GO:0003824;GO:0004745;GO:0005783;GO:0008202;GO:0042572;GO:0043231;GO:0047023;GO:0047044	1.1.1.105
0.262272	0.00806332	-0.063179	0.470545	0.497572	-0.386778	0.287256	0.266326	-0.00648594	-0.194954	0.12139	0.00748253	0.393637	0.199365	1.00756	2.08122	CD36	+	7.86482	0	Q61009	Q61009	SCRB1_MOUSE	Scarb1	Scavenger receptor class B member 1	3fa_3ea;3ga_3ea;3bb_3ea;3cb_3ea;3ha_3ea;3ab_3ea;3eb_3ea;3ia_3ea;3ba_3ea;3aa_3ea;3aa_3ca;3aa_3da;3aa_3gb;3aa_3fb;3aa_3db;3aa_ctrl;3aa_3fa;3aa_3ga;3aa_3bb;3aa_3cb;3aa_3ha;3aa_3ab;3aa_3eb;3aa_3ia	adhesion of symbiont to host [GO:0044406];androgen biosynthetic process [GO:0006702];blood vessel endothelial cell migration [GO:0043534];carotenoid transport [GO:0046867];cholesterol catabolic process [GO:0006707];cholesterol efflux [GO:0033344];cholesterol homeostasis [GO:0042632];cholesterol import [GO:0070508];cholesterol transport [GO:0030301];detection of lipopolysaccharide [GO:0032497];end…	caveola [GO:0005901];cell surface [GO:0009986];cytoplasm [GO:0005737];intracellular membrane-bounded organelle [GO:0043231];lysosome [GO:0005764];membrane [GO:0016020];microvillus membrane [GO:0031528];plasma membrane [GO:0005886]	amyloid-beta binding [GO:0001540];apolipoprotein A-I binding [GO:0034186];apolipoprotein binding [GO:0034185];high-density lipoprotein particle binding [GO:0008035];high-density lipoprotein particle receptor activity [GO:0070506];identical protein binding [GO:0042802];lipid binding [GO:0008289];lipopolysaccharide binding [GO:0001530];lipopolysaccharide immune receptor activity [GO:0001875];low-de…	caveola [GO:0005901];cell surface [GO:0009986];cytoplasm [GO:0005737];intracellular membrane-bounded organelle [GO:0043231];lysosome [GO:0005764];membrane [GO:0016020];microvillus membrane [GO:0031528];plasma membrane [GO:0005886];amyloid-beta binding [GO:0001540];apolipoprotein A-I binding [GO:0034186];apolipoprotein binding [GO:0034185];high-density lipoprotein particle binding [GO:0008035];hig…	GO:0001530;GO:0001540;GO:0001786;GO:0001875;GO:0001935;GO:0005044;GO:0005737;GO:0005764;GO:0005886;GO:0005901;GO:0006702;GO:0006707;GO:0006869;GO:0006910;GO:0008035;GO:0008289;GO:0009986;GO:0010867;GO:0010886;GO:0010899;GO:0015914;GO:0015920;GO:0016020;GO:0030169;GO:0030301;GO:0031528;GO:0032497;GO:0033344;GO:0034185;GO:0034186;GO:0034375;GO:0034381;GO:0034383;GO:0034384;GO:0035461;GO:0042632;GO:…
0.13047	0.0456142	-0.0377417	0.0407524	0.11307	-0.202262	0.0600061	0.110985	0.239934	0.0461674	0.34684	0.564337	0.295124	0.0895138	0.561038	1.44244	Pro_dh	+	8.91076	0	Q9WU79	Q9WU79	PROD_MOUSE	Prodh	Proline dehydrogenase 1, mitochondrial	3fa_3ea;3ba_3ea;3aa_3ea;3aa_3gb;3aa_3da;3aa_ctrl;3aa_3eb;3aa_3ab;3aa_3db;3aa_3ia;3aa_3fb;3aa_3ha;3aa_3cb;3aa_3bb;3aa_3ca;3aa_3ga;3aa_3fa;3aa_3ba	positive regulation of cell death [GO:0010942];proline catabolic process to glutamate [GO:0010133]	intracellular membrane-bounded organelle [GO:0043231];mitochondrial inner membrane [GO:0005743];mitochondrial matrix [GO:0005759];mitochondrion [GO:0005739];nucleoplasm [GO:0005654]	amino acid binding [GO:0016597];FAD binding [GO:0071949];proline dehydrogenase activity [GO:0004657]	intracellular membrane-bounded organelle [GO:0043231];mitochondrial inner membrane [GO:0005743];mitochondrial matrix [GO:0005759];mitochondrion [GO:0005739];nucleoplasm [GO:0005654];amino acid binding [GO:0016597];FAD binding [GO:0071949];proline dehydrogenase activity [GO:0004657];positive regulation of cell death [GO:0010942];proline catabolic process to glutamate [GO:0010133]	GO:0004657;GO:0005654;GO:0005739;GO:0005743;GO:0005759;GO:0010133;GO:0010942;GO:0016597;GO:0043231;GO:0071949	1.5.5.2
0.183666	-0.211418	-0.0310259	0.480528	-0.161748	-0.143619	0.0664539	-0.129601	0.0346622	0.0825443	0.265833	-0.320699	0.109638	-0.134624	0.172316	1.56985	Sdh_cyt	+	7.09652	0.000121212	Q9CZB0	Q9CZB0	C560_MOUSE	Sdhc	Succinate dehydrogenase cytochrome b560 subunit, mitochondrial	3ia_3ea;3aa_3ea;3aa_3fa;3aa_3gb;3aa_3fb;3aa_3db;3aa_3ab;3aa_3cb;3aa_3eb;3aa_ctrl;3aa_3ca;3aa_3ha;3aa_3da;3aa_3bb;3aa_3ba;3aa_3ga;3aa_3ia	mitochondrial electron transport, succinate to ubiquinone [GO:0006121];proton motive force-driven mitochondrial ATP synthesis [GO:0042776];tricarboxylic acid cycle [GO:0006099]	mitochondrial inner membrane [GO:0005743];mitochondrial respiratory chain complex II, succinate dehydrogenase complex (ubiquinone) [GO:0005749];mitochondrion [GO:0005739];succinate dehydrogenase complex (ubiquinone) [GO:0045257]	electron transfer activity [GO:0009055];heme binding [GO:0020037];metal ion binding [GO:0046872];succinate dehydrogenase activity [GO:0000104]	mitochondrial inner membrane [GO:0005743];mitochondrial respiratory chain complex II, succinate dehydrogenase complex (ubiquinone) [GO:0005749];mitochondrion [GO:0005739];succinate dehydrogenase complex (ubiquinone) [GO:0045257];electron transfer activity [GO:0009055];heme binding [GO:0020037];metal ion binding [GO:0046872];succinate dehydrogenase activity [GO:0000104];mitochondrial electron tran…	GO:0000104;GO:0005739;GO:0005743;GO:0005749;GO:0006099;GO:0006121;GO:0009055;GO:0020037;GO:0042776;GO:0045257;GO:0046872
-0.916805	0.207605	0.373852	0.214268	0.24748	-0.0875988	-0.0453901	-0.0110683	-0.63191	-0.206578	0.0445213	-0.0271683	0.92404	1.35033	0.825224	0.678668		+	3.79405	0.0203457	Q8VC10	Q8VC10	OSGI1_MOUSE	Osgin1	Oxidative stress-induced growth inhibitor 1	3bb_3ha;3ab_3ha;3bb_3ca;3ab_3ca;3ab_ctrl;3ab_3ga;3ab_3db	cell differentiation [GO:0030154];negative regulation of cell growth [GO:0030308];regulation of apoptotic process [GO:0042981];regulation of cell migration [GO:0030334];regulation of cell population proliferation [GO:0042127]		growth factor activity [GO:0008083]	growth factor activity [GO:0008083];cell differentiation [GO:0030154];negative regulation of cell growth [GO:0030308];regulation of apoptotic process [GO:0042981];regulation of cell migration [GO:0030334];regulation of cell population proliferation [GO:0042127]	GO:0008083;GO:0030154;GO:0030308;GO:0030334;GO:0042127;GO:0042981
0.596064	0.0682621	-0.0156746	-0.0683565	-0.0816488	-0.0575476	-0.305088	0.0548401	-0.299406	-0.252197	-0.236942	-0.203417	1.15521	0.636404	1.55999	0.925133	START	+	17.5783	0	Q9EPQ7	Q9EPQ7	STAR5_MOUSE	Stard5	StAR-related lipid transfer protein 5	3ha_3db;3ab_3db;3aa_3db;3bb_3db;3ba_3db;3ha_3ga;3ab_3ga;3aa_3ga;3bb_3ga;3ba_3ga;3ha_3ca;3ab_3ca;3aa_3ca;3bb_3ca;3ba_3ca;3ha_3da;3ab_3da;3aa_3da;3bb_3da;3ba_3da;3ab_3ia;3aa_3ia;3bb_3ia;3ba_3ia;3aa_3ea;3bb_3ea;3ba_3ea;3aa_3fa;3bb_3fa;3ba_3fa;3aa_3eb;3bb_3eb;3ba_3eb;3aa_3cb;3bb_3cb;3ba_3cb;3aa_3gb;3bb_3gb;3ba_3gb;3aa_ctrl;3bb_ctrl;3ba_ctrl;3aa_3fb;3bb_3fb;3ba_3fb;3ba_3ha;3ba_3ab	cholesterol import [GO:0070508]		cholesterol binding [GO:0015485];cholesterol transfer activity [GO:0120020]	cholesterol binding [GO:0015485];cholesterol transfer activity [GO:0120020];cholesterol import [GO:0070508]	GO:0015485;GO:0070508;GO:0120020
-0.131716	0.11198	0.0191383	-0.179691	0.028513	0.083415	-0.0816326	0.019989	-0.0697556	0.0571861	-0.156278	-0.0174236	0.966181	0.142627	-0.054718	0.0740528	Transket_pyr;Transketolase_C	+	3.8632	0.0183797	Q9D051	Q9D051	ODPB_MOUSE	Pdhb	Pyruvate dehydrogenase E1 component subunit beta, mitochondrial	3bb_3ha;3bb_3fa;3bb_3ca;3bb_3ia;3bb_3ga;3bb_3db;3bb_3aa;3bb_3ea;3bb_3ba;3bb_ctrl;3bb_3da;3bb_3cb;3bb_3eb;3bb_3gb;3bb_3fb	acetyl-CoA biosynthetic process from pyruvate [GO:0006086];glucose metabolic process [GO:0006006];tricarboxylic acid cycle [GO:0006099]	acetyltransferase complex [GO:1902493];catalytic complex [GO:1902494];dihydrolipoyl dehydrogenase complex [GO:0045240];mitochondrial pyruvate dehydrogenase complex [GO:0005967];mitochondrion [GO:0005739];nucleoplasm [GO:0005654];pyruvate dehydrogenase complex [GO:0045254]	pyruvate dehydrogenase (acetyl-transferring) activity [GO:0004739];pyruvate dehydrogenase (NAD+) activity [GO:0034604]	acetyltransferase complex [GO:1902493];catalytic complex [GO:1902494];dihydrolipoyl dehydrogenase complex [GO:0045240];mitochondrial pyruvate dehydrogenase complex [GO:0005967];mitochondrion [GO:0005739];nucleoplasm [GO:0005654];pyruvate dehydrogenase complex [GO:0045254];pyruvate dehydrogenase (acetyl-transferring) activity [GO:0004739];pyruvate dehydrogenase (NAD+) activity [GO:0034604];acetyl-…	GO:0004739;GO:0005654;GO:0005739;GO:0005967;GO:0006006;GO:0006086;GO:0006099;GO:0034604;GO:0045240;GO:0045254;GO:1902493;GO:1902494	1.2.4.1
-0.0208931	-0.619715	-0.272884	-0.0985565	-0.0244036	0.0732098	-0.27429	-0.507292	0.0570736	-0.00306702	-0.0108528	-0.101522	1.00944	0.541591	0.264896	0.0959606		+	14.1451	0	Q61578	Q61578	ADRO_MOUSE	Fdxr	NADPH:adrenodoxin oxidoreductase, mitochondrial	3ga_3fb;3ha_3fb;3eb_3fb;ctrl_3fb;3da_3fb;3ca_3fb;3ea_3fb;3aa_3fb;3ba_3fb;3ab_3fb;3bb_3fb;3ca_3cb;3ea_3cb;3aa_3cb;3ba_3cb;3ab_3cb;3bb_3cb;3ab_3db;3bb_3db;3ab_3gb;3bb_3gb;3ab_3ia;3bb_3ia;3ab_3fa;3bb_3fa;3ab_3ga;3bb_3ga;3ab_3ha;3bb_3ha;3ab_3eb;3bb_3eb;3ab_ctrl;3bb_ctrl;3ab_3da;3bb_3da;3ab_3ca;3bb_3ca;3bb_3ea;3bb_3aa;3bb_3ba	cholesterol metabolic process [GO:0008203];NADPH oxidation [GO:0070995];ubiquinone biosynthetic process [GO:0006744]	mitochondrial inner membrane [GO:0005743];mitochondrion [GO:0005739]	NADPH binding [GO:0070402];NADPH-adrenodoxin reductase activity [GO:0015039]	mitochondrial inner membrane [GO:0005743];mitochondrion [GO:0005739];NADPH binding [GO:0070402];NADPH-adrenodoxin reductase activity [GO:0015039];cholesterol metabolic process [GO:0008203];NADPH oxidation [GO:0070995];ubiquinone biosynthetic process [GO:0006744]	GO:0005739;GO:0005743;GO:0006744;GO:0008203;GO:0015039;GO:0070402;GO:0070995	1.18.1.6
0.309523	0.327377	0.220287	0.161032	0.175644	0.0287018	0.159088	0.148609	0.1066	0.133404	0.149426	0.144463	1.64956	1.30255	0.638828	0.682472	Flavodoxin_2	+	11.2624	0	Q9JI75	NQO2_HUMAN;Q9JI75	NQO2_MOUSE	Nqo2	Ribosyldihydronicotinamide dehydrogenase [quinone]	3ab_3ea;3bb_3ea;3ab_3fa;3bb_3fa;3ab_ctrl;3bb_ctrl;3ab_3ca;3bb_3ca;3ab_3cb;3bb_3cb;3ab_3eb;3bb_3eb;3ab_3da;3bb_3da;3ab_3ga;3bb_3ga;3ab_3ia;3bb_3ia;3ab_3db;3bb_3db;3ab_3ha;3bb_3ha;3ab_3gb;3bb_3gb;3ab_3fb;3bb_3fb;3bb_3ba;3bb_3aa	positive regulation of ERK1 and ERK2 cascade [GO:0070374];positive regulation of neuron apoptotic process [GO:0043525];positive regulation of reactive oxygen species metabolic process [GO:2000379];positive regulation of vascular associated smooth muscle cell proliferation [GO:1904707];quinone catabolic process [GO:1901662]	cytosol [GO:0005829];nucleoplasm [GO:0005654]	chloride ion binding [GO:0031404];dihydronicotinamide riboside quinone reductase activity [GO:0001512];electron transfer activity [GO:0009055];FAD binding [GO:0071949];melatonin binding [GO:1904408];NAD(P)H dehydrogenase (quinone) activity [GO:0003955];oxidoreductase activity [GO:0016491];oxidoreductase activity, acting on other nitrogenous compounds as donors [GO:0016661];protein homodimerizatio…	cytosol [GO:0005829];nucleoplasm [GO:0005654];chloride ion binding [GO:0031404];dihydronicotinamide riboside quinone reductase activity [GO:0001512];electron transfer activity [GO:0009055];FAD binding [GO:0071949];melatonin binding [GO:1904408];NAD(P)H dehydrogenase (quinone) activity [GO:0003955];oxidoreductase activity [GO:0016491];oxidoreductase activity, acting on other nitrogenous compounds …	GO:0001512;GO:0003955;GO:0005654;GO:0005829;GO:0008270;GO:0009055;GO:0016491;GO:0016661;GO:0031404;GO:0042803;GO:0043525;GO:0070374;GO:0071949;GO:1901662;GO:1904408;GO:1904707;GO:1905594;GO:2000379	1.10.5.1
0.332152	0.108348	-0.0330324	0.479337	-0.0543613	-0.232098	-0.019866	0.0502567	-0.0454826	0.0751629	0.47689	0.101859	1.49279	0.729671	0.527595	0.53026	DAO	+	12.4562	0	Q91YP0	Q91YP0	L2HDH_MOUSE	L2hgdh	L-2-hydroxyglutarate dehydrogenase, mitochondrial	3ga_3ea;3aa_3ea;3ba_3ea;3ia_3ea;3ab_3ea;3bb_3ea;3ia_3gb;3ab_3gb;3bb_3gb;3ia_3ca;3ab_3ca;3bb_3ca;3ab_3eb;3bb_3eb;3ab_ctrl;3bb_ctrl;3ab_3db;3bb_3db;3ab_3cb;3bb_3cb;3ab_3fa;3bb_3fa;3bb_3da;3bb_3fb;3bb_3ha;3bb_3ga;3bb_3aa;3bb_3ba;3bb_3ia;3bb_3ab	small molecule metabolic process [GO:0044281]	membrane [GO:0016020];mitochondrion [GO:0005739]	2-hydroxyglutarate dehydrogenase activity [GO:0047545]	membrane [GO:0016020];mitochondrion [GO:0005739];2-hydroxyglutarate dehydrogenase activity [GO:0047545];small molecule metabolic process [GO:0044281]	GO:0005739;GO:0016020;GO:0044281;GO:0047545	1.1.99.2
0.23423	0.169748	0.261508	0.284575	-0.131128	-0.18545	-0.00395584	0.0783854	0.0163097	0.0432625	0.583618	0.339199	1.05247	0.7316	0.319785	0.29036	FAD_binding_1;Flavodoxin_1;NAD_binding_1	+	4.93996	0.00406667	P37040	P37040	NCPR_MOUSE	Por	NADPH--cytochrome P450 reductase	3ga_3ea;3ab_3ea;3bb_3ea;3bb_3eb;3bb_3da;3bb_ctrl;3bb_3ca;3bb_3cb;3bb_3db;3bb_3ha;3bb_3fa;3bb_3fb;3bb_3ia	carnitine metabolic process [GO:0009437];cellular organofluorine metabolic process [GO:0090346];cellular response to follicle-stimulating hormone stimulus [GO:0071372];cellular response to peptide hormone stimulus [GO:0071375];demethylation [GO:0070988];electron transport chain [GO:0022900];fatty acid oxidation [GO:0019395];flavonoid metabolic process [GO:0009812];internal peptidyl-lysine acetyla…	cytosol [GO:0005829];endoplasmic reticulum membrane [GO:0005789];intracellular membrane-bounded organelle [GO:0043231];membrane [GO:0016020];mitochondrion [GO:0005739]	cytochrome-b5 reductase activity, acting on NAD(P)H [GO:0004128];electron transfer activity [GO:0009055];enzyme binding [GO:0019899];flavin adenine dinucleotide binding [GO:0050660];FMN binding [GO:0010181];hydrolase activity [GO:0016787];iron-cytochrome-c reductase activity [GO:0047726];NADP binding [GO:0050661];NADPH-hemoprotein reductase activity [GO:0003958];nitric oxide dioxygenase activity …	cytosol [GO:0005829];endoplasmic reticulum membrane [GO:0005789];intracellular membrane-bounded organelle [GO:0043231];membrane [GO:0016020];mitochondrion [GO:0005739];cytochrome-b5 reductase activity, acting on NAD(P)H [GO:0004128];electron transfer activity [GO:0009055];enzyme binding [GO:0019899];flavin adenine dinucleotide binding [GO:0050660];FMN binding [GO:0010181];hydrolase activity [GO:0…	GO:0003420;GO:0003958;GO:0004128;GO:0005739;GO:0005789;GO:0005829;GO:0007584;GO:0008941;GO:0009055;GO:0009410;GO:0009437;GO:0009725;GO:0009812;GO:0010181;GO:0016020;GO:0016491;GO:0016787;GO:0018393;GO:0019395;GO:0019899;GO:0022900;GO:0032332;GO:0032770;GO:0043066;GO:0043154;GO:0043231;GO:0043602;GO:0045542;GO:0045880;GO:0046210;GO:0047726;GO:0050660;GO:0050661;GO:0060192;GO:0070988;GO:0071372;GO:…	1.6.2.4
0.00892639	0.668156	0.0760746	-0.132221	-0.100086	0.155384	-0.03088	0.0238609	-0.0184174	0.169998	0.101707	0.00884247	1.84887	0.318237	0.417097	0.245758	Pyr_redox;Pyr_redox_2;Pyr_redox_dim	+	6.86657	0.000210526	O08749	O08749	DLDH_MOUSE	Dld	Dihydrolipoyl dehydrogenase, mitochondrial	3bb_3ia;3bb_3eb;3bb_ctrl;3bb_3db;3bb_3fa;3bb_3ha;3bb_3gb;3bb_3ca;3bb_3cb;3bb_3ga;3bb_3da;3bb_3ea;3bb_3ab;3bb_3aa;3bb_3ba;3bb_3fb	2-oxoglutarate metabolic process [GO:0006103];acetyl-CoA biosynthetic process from pyruvate [GO:0006086];branched-chain amino acid catabolic process [GO:0009083];dihydrolipoamide metabolic process [GO:0051068];gastrulation [GO:0007369];histone succinylation [GO:0106077];lipoate metabolic process [GO:0009106];mitochondrial electron transport, NADH to ubiquinone [GO:0006120];proteolysis [GO:0006508…	acetyltransferase complex [GO:1902493];acrosomal matrix [GO:0043159];cilium [GO:0005929];dihydrolipoyl dehydrogenase complex [GO:0045240];mitochondrial alpha-ketoglutarate dehydrogenase complex [GO:0005947];mitochondrial matrix [GO:0005759];mitochondrial pyruvate dehydrogenase complex [GO:0005967];mitochondrion [GO:0005739];motile cilium [GO:0031514];myelin sheath [GO:0043209];nucleus [GO:0005634…	dihydrolipoyl dehydrogenase activity [GO:0004148];flavin adenine dinucleotide binding [GO:0050660];lipoamide binding [GO:0043544];NAD binding [GO:0051287];pyruvate dehydrogenase (NAD+) activity [GO:0034604]	acetyltransferase complex [GO:1902493];acrosomal matrix [GO:0043159];cilium [GO:0005929];dihydrolipoyl dehydrogenase complex [GO:0045240];mitochondrial alpha-ketoglutarate dehydrogenase complex [GO:0005947];mitochondrial matrix [GO:0005759];mitochondrial pyruvate dehydrogenase complex [GO:0005967];mitochondrion [GO:0005739];motile cilium [GO:0031514];myelin sheath [GO:0043209];nucleus [GO:0005634…	GO:0004148;GO:0005634;GO:0005739;GO:0005759;GO:0005929;GO:0005947;GO:0005967;GO:0006086;GO:0006103;GO:0006120;GO:0006508;GO:0007369;GO:0009083;GO:0009106;GO:0031514;GO:0034604;GO:0042391;GO:0043159;GO:0043209;GO:0043544;GO:0045240;GO:0045252;GO:0045254;GO:0048240;GO:0050660;GO:0051068;GO:0051287;GO:0106077;GO:1902493	1.8.1.4
1.62343	0.531359	0.163322	0.849518	0.141983	0.0818901	0.0671577	0.175934	0.152018	0.181263	0.281876	0.550323	0.0890541	0.0736732	0.154364	0.233425	Aldedh	+	10.7389	0	Q8BH00	Q8BH00	AL8A1_MOUSE	Aldh8a1	2-aminomuconic semialdehyde dehydrogenase	3ia_ctrl;3ha_ctrl;3ia_3bb;3ha_3bb;3ia_3ab;3ha_3ab;3ia_3db;3ha_3db;3ia_3ea;3ha_3ea;3ia_3eb;3ha_3eb;3ia_3ca;3ha_3ca;3ha_3ba;3ha_3gb;3ha_3cb;3ha_3da;3ha_3aa;3ha_3ga;3ha_3fa;3ha_3fb;3ha_3ia	9-cis-retinoic acid biosynthetic process [GO:0042904];L-kynurenine catabolic process [GO:0097053];retinal metabolic process [GO:0042574];retinoic acid metabolic process [GO:0042573]	cytoplasm [GO:0005737]	aminomuconate-semialdehyde dehydrogenase activity [GO:0047102];retinal dehydrogenase activity [GO:0001758]	cytoplasm [GO:0005737];aminomuconate-semialdehyde dehydrogenase activity [GO:0047102];retinal dehydrogenase activity [GO:0001758];9-cis-retinoic acid biosynthetic process [GO:0042904];L-kynurenine catabolic process [GO:0097053];retinal metabolic process [GO:0042574];retinoic acid metabolic process [GO:0042573]	GO:0001758;GO:0005737;GO:0042573;GO:0042574;GO:0042904;GO:0047102;GO:0097053	1.2.1.32
1.4874	1.5375	0.35686	0.386981	0.100445	0.0811663	0.066411	0.148593	0.246009	0.12202	0.246488	0.271874	0.197543	0.160207	0.0530081	0.340238	Aldedh	+	12.5189	0	P47740	P47740	AL3A2_MOUSE	Aldh3a2	Aldehyde dehydrogenase family 3 member A2	3ha_3ea;3fb_3ea;3ha_3eb;3fb_3eb;3ha_ctrl;3fb_ctrl;3ha_3db;3fb_3db;3ha_3da;3fb_3da;3ha_3ba;3fb_3ba;3ha_3ca;3fb_3ca;3ha_3bb;3fb_3bb;3ha_3cb;3fb_3cb;3ha_3ab;3fb_3ab;3ha_3fa;3fb_3fa;3ha_3ga;3fb_3ga;3ha_3aa;3fb_3aa;3ha_3gb;3fb_3gb;3ha_3ia;3fb_3ia	cellular aldehyde metabolic process [GO:0006081];central nervous system development [GO:0007417];epidermis development [GO:0008544];fatty acid metabolic process [GO:0006631];formaldehyde metabolic process [GO:0046292];hexadecanal metabolic process [GO:0046458];peripheral nervous system development [GO:0007422];phytol metabolic process [GO:0033306];response to reactive oxygen species [GO:0000302];…	cytoplasm [GO:0005737];cytosol [GO:0005829];endoplasmic reticulum [GO:0005783];endoplasmic reticulum membrane [GO:0005789];intracellular membrane-bounded organelle [GO:0043231];membrane [GO:0016020];mitochondrial inner membrane [GO:0005743];mitochondrion [GO:0005739];nucleus [GO:0005634];peroxisome [GO:0005777]	3-chloroallyl aldehyde dehydrogenase activity [GO:0004028];aldehyde dehydrogenase (NAD+) activity [GO:0004029];glyceraldehyde-3-phosphate dehydrogenase (NAD+) (non-phosphorylating) activity [GO:0043878];long-chain-alcohol oxidase activity [GO:0046577];long-chain-aldehyde dehydrogenase activity [GO:0050061];medium-chain-aldehyde dehydrogenase activity [GO:0052814];protein homodimerization activity…	cytoplasm [GO:0005737];cytosol [GO:0005829];endoplasmic reticulum [GO:0005783];endoplasmic reticulum membrane [GO:0005789];intracellular membrane-bounded organelle [GO:0043231];membrane [GO:0016020];mitochondrial inner membrane [GO:0005743];mitochondrion [GO:0005739];nucleus [GO:0005634];peroxisome [GO:0005777];3-chloroallyl aldehyde dehydrogenase activity [GO:0004028];aldehyde dehydrogenase (NAD…	GO:0000302;GO:0004028;GO:0004029;GO:0005634;GO:0005737;GO:0005739;GO:0005743;GO:0005777;GO:0005783;GO:0005789;GO:0005829;GO:0006081;GO:0006631;GO:0006714;GO:0007417;GO:0007422;GO:0008544;GO:0016020;GO:0033306;GO:0042803;GO:0043231;GO:0043878;GO:0046292;GO:0046458;GO:0046577;GO:0050061;GO:0052814	1.2.1.3;1.2.1.94
0.321095	1.22765	0.386517	0.332397	0.171293	0.0529575	0.254107	0.828325	0.513931	0.348892	0.393766	0.2864	0.446465	0.21908	0.382931	0.339956	p450	+	6.64193	0.000585366	Q8CIM7	Q8CIM7	CP2DQ_MOUSE	Cyp2d26	Cytochrome P450 2D26	3cb_3ea;3fb_3ea;3cb_ctrl;3fb_ctrl;3fb_3eb;3fb_3fa;3fb_3ab;3fb_3db;3fb_3da;3fb_3aa;3fb_3ha;3fb_3gb;3fb_3ga;3fb_3ia;3fb_3ba;3fb_3bb;3fb_3ca	arachidonic acid metabolic process [GO:0019369];response to xenobiotic stimulus [GO:0009410];xenobiotic metabolic process [GO:0006805]	cytoplasm [GO:0005737];endoplasmic reticulum membrane [GO:0005789];intracellular membrane-bounded organelle [GO:0043231];mitochondrion [GO:0005739]	anandamide 11,12 epoxidase activity [GO:0062188];anandamide 14,15 epoxidase activity [GO:0062189];anandamide 8,9 epoxidase activity [GO:0062187];aromatase activity [GO:0070330];heme binding [GO:0020037];iron ion binding [GO:0005506];monooxygenase activity [GO:0004497];oxidoreductase activity [GO:0016491];oxidoreductase activity, acting on paired donors, with incorporation or reduction of molecula…	cytoplasm [GO:0005737];endoplasmic reticulum membrane [GO:0005789];intracellular membrane-bounded organelle [GO:0043231];mitochondrion [GO:0005739];anandamide 11,12 epoxidase activity [GO:0062188];anandamide 14,15 epoxidase activity [GO:0062189];anandamide 8,9 epoxidase activity [GO:0062187];aromatase activity [GO:0070330];heme binding [GO:0020037];iron ion binding [GO:0005506];monooxygenase acti…	GO:0004497;GO:0005506;GO:0005737;GO:0005739;GO:0005789;GO:0006805;GO:0009410;GO:0016491;GO:0016712;GO:0019369;GO:0020037;GO:0043231;GO:0062187;GO:0062188;GO:0062189;GO:0070330	1.14.14.1
0.759745	0.747347	0.299335	0.365767	0.197815	0.0332355	0.0359716	0.280261	0.148203	0.222881	0.61895	0.821814	0.34679	0.215254	0.351112	0.417247	ETF_QO	+	5.30521	0.0025	Q921G7	Q921G7	ETFD_MOUSE	Etfdh	Electron transfer flavoprotein-ubiquinone oxidoreductase, mitochondrial	3fa_3ea;3fb_3ea;3ha_3ea;3fa_ctrl;3fb_ctrl;3ha_ctrl;3fa_3ca;3fb_3ca;3ha_3ca;3fa_3db;3fb_3db;3ha_3db;3fb_3ab;3ha_3ab	electron transport chain [GO:0022900];fatty acid beta-oxidation using acyl-CoA dehydrogenase [GO:0033539];response to oxidative stress [GO:0006979]	membrane [GO:0016020];mitochondrial electron transfer flavoprotein complex [GO:0017133];mitochondrial inner membrane [GO:0005743];mitochondrial membrane [GO:0031966];mitochondrion [GO:0005739]	4 iron, 4 sulfur cluster binding [GO:0051539];electron transfer activity [GO:0009055];electron-transferring-flavoprotein dehydrogenase activity [GO:0004174];iron-sulfur cluster binding [GO:0051536];metal ion binding [GO:0046872];oxidoreductase activity [GO:0016491];quinone binding [GO:0048038];ubiquinone binding [GO:0048039]	membrane [GO:0016020];mitochondrial electron transfer flavoprotein complex [GO:0017133];mitochondrial inner membrane [GO:0005743];mitochondrial membrane [GO:0031966];mitochondrion [GO:0005739];4 iron, 4 sulfur cluster binding [GO:0051539];electron transfer activity [GO:0009055];electron-transferring-flavoprotein dehydrogenase activity [GO:0004174];iron-sulfur cluster binding [GO:0051536];metal io…	GO:0004174;GO:0005739;GO:0005743;GO:0006979;GO:0009055;GO:0016020;GO:0016491;GO:0017133;GO:0022900;GO:0031966;GO:0033539;GO:0046872;GO:0048038;GO:0048039;GO:0051536;GO:0051539	1.5.5.1
1.24583	0.00838852	-0.263835	0.926864	-0.232861	-0.0721369	0.154512	0.374844	0.573518	-0.225437	0.651045	0.451068	0.258899	-0.206691	0.556952	0.860109	adh_short	+	3.47887	0.0321333	Q8BTX9	Q8BTX9	HSDL1_MOUSE	Hsdl1	Inactive hydroxysteroid dehydrogenase-like protein 1	3ha_3eb;3ha_3gb		intermediate filament cytoskeleton [GO:0045111];intracellular membrane-bounded organelle [GO:0043231];mitochondrion [GO:0005739]		intermediate filament cytoskeleton [GO:0045111];intracellular membrane-bounded organelle [GO:0043231];mitochondrion [GO:0005739]	GO:0005739;GO:0043231;GO:0045111
1.0966	0.266983	0.300678	0.481119	0.113516	-0.230858	0.231366	0.179632	0.296764	0.277293	0.492593	0.380693	0.261095	0.173235	0.413631	0.94794	IIGP	+	4.35515	0.00917647	Q60766	Q60766	IRGM1_MOUSE	Irgm1	Immunity-related GTPase family M protein 1	3aa_3ea;3ha_3ea;3aa_ctrl;3ha_ctrl;3aa_3ab;3ha_3ab;3aa_3eb;3ha_3eb;3aa_3da;3ha_3da;3ha_3db;3ha_3fa;3aa_3cb;3ha_3cb	autophagosome assembly [GO:0000045];autophagosome maturation [GO:0097352];CAMKK-AMPK signaling cascade [GO:0061762];cellular response to interferon-beta [GO:0035458];cellular response to lipopolysaccharide [GO:0071222];cellular response to type II interferon [GO:0071346];cellular response to virus [GO:0098586];defense response [GO:0006952];defense response to bacterium [GO:0042742];defense respon…	autolysosome [GO:0044754];autophagosome [GO:0005776];autophagosome membrane [GO:0000421];cell projection [GO:0042995];cytosol [GO:0005829];endoplasmic reticulum [GO:0005783];endoplasmic reticulum membrane [GO:0005789];Golgi apparatus [GO:0005794];Golgi membrane [GO:0000139];late endosome [GO:0005770];late endosome membrane [GO:0031902];lysosomal membrane [GO:0005765];lysosome [GO:0005764];mitocho…	BH3 domain binding [GO:0051434];CARD domain binding [GO:0050700];cardiolipin binding [GO:1901612];GTP binding [GO:0005525];GTPase activity [GO:0003924];phosphatidylinositol-3,4,5-trisphosphate binding [GO:0005547];phosphatidylinositol-3,4-bisphosphate binding [GO:0043325];protein kinase binding [GO:0019901];protein serine/threonine kinase activator activity [GO:0043539]	autolysosome [GO:0044754];autophagosome [GO:0005776];autophagosome membrane [GO:0000421];cell projection [GO:0042995];cytosol [GO:0005829];endoplasmic reticulum [GO:0005783];endoplasmic reticulum membrane [GO:0005789];Golgi apparatus [GO:0005794];Golgi membrane [GO:0000139];late endosome [GO:0005770];late endosome membrane [GO:0031902];lysosomal membrane [GO:0005765];lysosome [GO:0005764];mitocho…	GO:0000045;GO:0000139;GO:0000421;GO:0001891;GO:0001934;GO:0003924;GO:0005525;GO:0005547;GO:0005739;GO:0005764;GO:0005765;GO:0005770;GO:0005776;GO:0005783;GO:0005789;GO:0005794;GO:0005829;GO:0006952;GO:0009617;GO:0010508;GO:0010800;GO:0019901;GO:0030670;GO:0031648;GO:0031902;GO:0031966;GO:0032480;GO:0032689;GO:0033138;GO:0035458;GO:0042742;GO:0042995;GO:0043032;GO:0043254;GO:0043325;GO:0043539;GO:…	3.6.5.-
0.960083	0.136893	0.268483	0.534714	0.283126	0.0708313	0.374868	0.349772	0.283604	0.302504	0.452454	0.400643	0.446465	0.217982	0.691894	1.29719	adh_short	+	7.36977	0	O54909	O54909	RDH16_MOUSE	Rdh16	Retinol dehydrogenase 16	3ha_3ea;3aa_3ea;3ha_ctrl;3aa_ctrl;3aa_3fb;3aa_3da;3aa_3ab;3aa_3eb;3aa_3ca;3aa_3db;3aa_3gb;3aa_3cb;3aa_3fa;3aa_3bb;3aa_3ga;3aa_3ia;3aa_3ba	9-cis-retinoic acid biosynthetic process [GO:0042904];positive regulation of retinoic acid biosynthetic process [GO:1900054];retinoic acid metabolic process [GO:0042573];retinoid metabolic process [GO:0001523];retinol metabolic process [GO:0042572];steroid metabolic process [GO:0008202]	endoplasmic reticulum lumen [GO:0005788];endoplasmic reticulum membrane [GO:0005789];intracellular membrane-bounded organelle [GO:0043231];organelle membrane [GO:0031090]	11-cis-retinol dehydrogenase [GO:0106429];androstan-3-alpha,17-beta-diol dehydrogenase activity [GO:0047044];androsterone dehydrogenase activity [GO:0047023];identical protein binding [GO:0042802];NAD-retinol dehydrogenase activity [GO:0004745]	endoplasmic reticulum lumen [GO:0005788];endoplasmic reticulum membrane [GO:0005789];intracellular membrane-bounded organelle [GO:0043231];organelle membrane [GO:0031090];11-cis-retinol dehydrogenase [GO:0106429];androstan-3-alpha,17-beta-diol dehydrogenase activity [GO:0047044];androsterone dehydrogenase activity [GO:0047023];identical protein binding [GO:0042802];NAD-retinol dehydrogenase activ…	GO:0001523;GO:0004745;GO:0005788;GO:0005789;GO:0008202;GO:0031090;GO:0042572;GO:0042573;GO:0042802;GO:0042904;GO:0043231;GO:0047023;GO:0047044;GO:0106429;GO:1900054	1.1.1.105;1.1.1.209;1.1.1.315;1.1.1.53
1.78358	0.414396	0.509239	1.20975	0.139162	0.230978	0.125347	0.174152	0.0938339	0.138233	1.07605	0.189417	0.300014	0.187565	1.04951	0.946659	Aldedh	+	10.7429	0	O35945	O35945	AL1A7_MOUSE	Aldh1a7	Aldehyde dehydrogenase, cytosolic 1	3ia_ctrl;3aa_ctrl;3ba_ctrl;3ga_ctrl;3ha_ctrl;3ia_3cb;3aa_3cb;3ba_3cb;3ga_3cb;3ha_3cb;3aa_3ca;3ba_3ca;3ga_3ca;3ha_3ca;3aa_3db;3ba_3db;3ga_3db;3ha_3db;3ba_3eb;3ga_3eb;3ha_3eb;3ba_3da;3ga_3da;3ha_3da;3ba_3ea;3ga_3ea;3ha_3ea;3ba_3ab;3ga_3ab;3ha_3ab;3ba_3fa;3ga_3fa;3ha_3fa;3ba_3bb;3ga_3bb;3ha_3bb;3ha_3gb;3ha_3fb	cellular detoxification of aldehyde [GO:0110095];ethanol catabolic process [GO:0006068];fructosamine catabolic process [GO:0030392];fructose catabolic process [GO:0006001]	cytosol [GO:0005829]	3-chloroallyl aldehyde dehydrogenase activity [GO:0004028];3-deoxyglucosone dehydrogenase activity [GO:0106373];aldehyde dehydrogenase (NAD+) activity [GO:0004029];benzaldehyde dehydrogenase (NAD+) activity [GO:0018479];glyceraldehyde-3-phosphate dehydrogenase (NAD+) (non-phosphorylating) activity [GO:0043878];identical protein binding [GO:0042802]	cytosol [GO:0005829];3-chloroallyl aldehyde dehydrogenase activity [GO:0004028];3-deoxyglucosone dehydrogenase activity [GO:0106373];aldehyde dehydrogenase (NAD+) activity [GO:0004029];benzaldehyde dehydrogenase (NAD+) activity [GO:0018479];glyceraldehyde-3-phosphate dehydrogenase (NAD+) (non-phosphorylating) activity [GO:0043878];identical protein binding [GO:0042802];cellular detoxification of …	GO:0004028;GO:0004029;GO:0005829;GO:0006001;GO:0006068;GO:0018479;GO:0030392;GO:0042802;GO:0043878;GO:0106373;GO:0110095	1.2.1.3
0.28595	1.20652	0.882448	-0.233658	-0.303595	-0.0690002	0.447632	0.383957	-0.0959435	0.073988	0.163553	0.0212727	0.645241	0.344978	0.0443707	0.0353508	Hemopexin	+	5.099	0.00350877	Q91X72	Q91X72	HEMO_MOUSE	Hpx	Hemopexin	3gb_3fa;3fb_3fa;3fb_3eb;3fb_3ia;3fb_3da;3fb_3ea;3fb_ctrl;3fb_3ca;3fb_3ba;3fb_3aa;3fb_3ha;3fb_3ga	heme metabolic process [GO:0042168];hemoglobin metabolic process [GO:0020027];intracellular iron ion homeostasis [GO:0006879];positive regulation of humoral immune response mediated by circulating immunoglobulin [GO:0002925];positive regulation of immunoglobulin production [GO:0002639];positive regulation of response to type II interferon [GO:0060332];positive regulation of type II interferon-med…	extracellular space [GO:0005615]	heme binding [GO:0020037];heme transmembrane transporter activity [GO:0015232];metal ion binding [GO:0046872]	extracellular space [GO:0005615];heme binding [GO:0020037];heme transmembrane transporter activity [GO:0015232];metal ion binding [GO:0046872];heme metabolic process [GO:0042168];hemoglobin metabolic process [GO:0020027];intracellular iron ion homeostasis [GO:0006879];positive regulation of humoral immune response mediated by circulating immunoglobulin [GO:0002925];positive regulation of immunogl…	GO:0002639;GO:0002925;GO:0005615;GO:0006879;GO:0007260;GO:0015232;GO:0020027;GO:0020037;GO:0042168;GO:0042531;GO:0046872;GO:0051246;GO:0060332;GO:0060333;GO:0060335
0.170683	0.591705	0.79727	-0.0362463	0.0696554	0.178982	0.580427	0.350648	0.285236	-0.0146532	0.133983	-0.0455303	0.510056	0.276623	0.0806389	0.092639	NAD_binding_1	+	6.25985	0.00109091	Q8VE38	Q8VE38	OXND1_MOUSE	Oxnad1	Oxidoreductase NAD-binding domain-containing protein 1	3fb_3eb;3gb_3eb;3db_3ia;3fb_3ia;3gb_3ia;3db_3da;3fb_3da;3gb_3da;3db_ctrl;3fb_ctrl;3gb_ctrl;3db_3fa;3fb_3fa;3gb_3fa;3db_3ba;3fb_3ba;3gb_3ba;3fb_3aa;3gb_3aa;3fb_3ga;3gb_3ga		mitochondrion [GO:0005739]	oxidoreductase activity [GO:0016491]	mitochondrion [GO:0005739];oxidoreductase activity [GO:0016491]	GO:0005739;GO:0016491	1.-.-.-
0.378969	0.454252	0.968191	0.116734	-0.150515	-0.398352	0.0123825	-0.163496	-0.156548	-0.107911	0.481586	-0.0222931	-0.108706	-0.0683708	-0.099884	0.0937719	ALO;FAD_binding_4	+	6.24197	0.00106667	P58710	P58710	GGLO_MOUSE	Gulo	L-gulonolactone oxidase	3fb_3ea;3ga_3ea;3gb_3ea;3ga_3eb;3gb_3eb;3ga_ctrl;3gb_ctrl;3ga_3ca;3gb_3ca;3ga_3ab;3gb_3ab;3ga_3ba;3gb_3ba;3gb_3bb;3ga_3cb;3gb_3cb;3gb_3fa;3gb_3da;3gb_3ia;3gb_3aa	L-ascorbic acid biosynthetic process [GO:0019853]	endoplasmic reticulum membrane [GO:0005789]	D-arabinono-1,4-lactone oxidase activity [GO:0003885];FAD binding [GO:0071949];flavin adenine dinucleotide binding [GO:0050660];L-gulonolactone oxidase activity [GO:0050105];oxidoreductase activity [GO:0016491]	endoplasmic reticulum membrane [GO:0005789];D-arabinono-1,4-lactone oxidase activity [GO:0003885];FAD binding [GO:0071949];flavin adenine dinucleotide binding [GO:0050660];L-gulonolactone oxidase activity [GO:0050105];oxidoreductase activity [GO:0016491];L-ascorbic acid biosynthetic process [GO:0019853]	GO:0003885;GO:0005789;GO:0016491;GO:0019853;GO:0050105;GO:0050660;GO:0071949	1.1.3.8
-0.0305843	1.03458	0.109173	-0.0319824	-0.152014	-0.0661774	0.0513792	-0.097415	-0.0884686	-0.309315	-0.188753	-0.0234613	0.0451117	-0.0208082	0.05019	-0.103224	Peptidase_M16;Peptidase_M16_C	+	5.81231	0.00156863	Q9CXT8	Q9CXT8	MPPB_MOUSE	Pmpcb	Mitochondrial-processing peptidase subunit beta	3fb_3da;3fb_3ea;3fb_3ga;3fb_3fa;3fb_3ca;3fb_ctrl;3fb_3eb;3fb_3aa;3fb_3ia;3fb_3ha;3fb_3cb;3fb_3ab;3fb_3ba;3fb_3bb;3fb_3db;3fb_3gb	protein processing [GO:0016485];protein processing involved in protein targeting to mitochondrion [GO:0006627]	mitochondrial inner membrane [GO:0005743];mitochondrial processing peptidase complex [GO:0017087];mitochondrion [GO:0005739]	endopeptidase activity [GO:0004175];metal ion binding [GO:0046872];metalloendopeptidase activity [GO:0004222];metallopeptidase activity [GO:0008237]	mitochondrial inner membrane [GO:0005743];mitochondrial processing peptidase complex [GO:0017087];mitochondrion [GO:0005739];endopeptidase activity [GO:0004175];metal ion binding [GO:0046872];metalloendopeptidase activity [GO:0004222];metallopeptidase activity [GO:0008237];protein processing [GO:0016485];protein processing involved in protein targeting to mitochondrion [GO:0006627]	GO:0004175;GO:0004222;GO:0005739;GO:0005743;GO:0006627;GO:0008237;GO:0016485;GO:0017087;GO:0046872	3.4.24.64
-0.280551	0.702875	0.260843	-0.149092	-0.056386	-0.0924349	0.0186329	-0.00831699	0.0123806	0.0341988	-0.0990791	-0.180828	0.0905685	-0.162955	-0.119875	-0.0713978	DUF1982;Molybdopterin;NADH-G_4Fe-4S_3	+	3.69384	0.0224471	Q91VD9	Q91VD9	NDUS1_MOUSE	Ndufs1	NADH-ubiquinone oxidoreductase 75 kDa subunit, mitochondrial	3gb_3ha;3fb_3ha;3fb_3fa;3fb_3ia;3fb_3ea;3fb_3ab;3fb_3ba;3fb_3ga;3fb_ctrl;3fb_3aa;3fb_3ca;3fb_3eb	aerobic respiration [GO:0009060];apoptotic mitochondrial changes [GO:0008637];ATP metabolic process [GO:0046034];cellular respiration [GO:0045333];mitochondrial electron transport, NADH to ubiquinone [GO:0006120];mitochondrial respiratory chain complex I assembly [GO:0032981];proton motive force-driven mitochondrial ATP synthesis [GO:0042776];reactive oxygen species metabolic process [GO:0072593]…	mitochondrial inner membrane [GO:0005743];mitochondrial intermembrane space [GO:0005758];mitochondrial respiratory chain complex I [GO:0005747];mitochondrion [GO:0005739];myelin sheath [GO:0043209]	2 iron, 2 sulfur cluster binding [GO:0051537];4 iron, 4 sulfur cluster binding [GO:0051539];electron transfer activity [GO:0009055];metal ion binding [GO:0046872];NADH dehydrogenase (ubiquinone) activity [GO:0008137]	mitochondrial inner membrane [GO:0005743];mitochondrial intermembrane space [GO:0005758];mitochondrial respiratory chain complex I [GO:0005747];mitochondrion [GO:0005739];myelin sheath [GO:0043209];2 iron, 2 sulfur cluster binding [GO:0051537];4 iron, 4 sulfur cluster binding [GO:0051539];electron transfer activity [GO:0009055];metal ion binding [GO:0046872];NADH dehydrogenase (ubiquinone) activi…	GO:0005739;GO:0005743;GO:0005747;GO:0005758;GO:0006120;GO:0008137;GO:0008637;GO:0009055;GO:0009060;GO:0032981;GO:0042776;GO:0043209;GO:0045333;GO:0046034;GO:0046872;GO:0051537;GO:0051539;GO:0051881;GO:0072593	7.1.1.2
-0.044816	0.526542	0.0254354	-0.111448	-0.00320053	-0.155412	0.0642529	-0.16474	-0.275291	-0.145387	-0.0540075	-0.162455	-0.014883	0.0833988	-0.0205564	-0.13926	DUF619	+	8.44805	0	Q8R4H7	Q8R4H7	NAGS_MOUSE	Nags	N-acetylglutamate synthase, mitochondrial	3ab_3ca;3fb_3ca;3fb_3da;3fb_3ea;3fb_3fa;3fb_3aa;3fb_3ga;3fb_3cb;3fb_3ia;3fb_3eb;3fb_3ba;3fb_3gb;3fb_3bb;3fb_3ha;3fb_ctrl;3fb_3db;3fb_3ab	arginine biosynthetic process [GO:0006526];glutamate metabolic process [GO:0006536];urea cycle [GO:0000050]	mitochondrial matrix [GO:0005759];mitochondrion [GO:0005739]	acetyl-CoA:L-glutamate N-acetyltransferase activity [GO:0004042];methione N-acyltransferase activity [GO:0103045]	mitochondrial matrix [GO:0005759];mitochondrion [GO:0005739];acetyl-CoA:L-glutamate N-acetyltransferase activity [GO:0004042];methione N-acyltransferase activity [GO:0103045];arginine biosynthetic process [GO:0006526];glutamate metabolic process [GO:0006536];urea cycle [GO:0000050]	GO:0000050;GO:0004042;GO:0005739;GO:0005759;GO:0006526;GO:0006536;GO:0103045	2.3.1.1
1.17757	0.999988	0.105882	0.0757532	-0.10517	0.00548458	-0.127763	0.0161352	-0.1221	0.136697	0.295158	0.0108652	0.00816822	-0.0580492	-0.0712576	0.1041	Prenylcys_lyase	+	6.95457	0.000222222	Q9CQF9	Q9CQF9	PCYOX_MOUSE	Pcyox1	Prenylcysteine oxidase 1	3fb_3db;3ha_3db;3fb_3fa;3ha_3fa;3fb_ctrl;3ha_ctrl;3fb_3ca;3ha_3ca;3fb_3ba;3ha_3ba;3fb_3eb;3ha_3eb;3fb_3ab;3ha_3ab;3fb_3ea;3ha_3ea;3fb_3gb;3ha_3gb;3fb_3cb;3ha_3cb;3fb_3da;3ha_3da;3fb_3ia;3ha_3ia;3fb_3bb;3ha_3bb;3ha_3aa;3ha_3ga	chloride transmembrane transport [GO:1902476];prenylated protein catabolic process [GO:0030327];prenylcysteine catabolic process [GO:0030328]	lysosome [GO:0005764];plasma membrane [GO:0005886];very-low-density lipoprotein particle [GO:0034361]	FAD binding [GO:0071949];farnesylcysteine lyase activity [GO:0102149];prenylcysteine oxidase activity [GO:0001735]	lysosome [GO:0005764];plasma membrane [GO:0005886];very-low-density lipoprotein particle [GO:0034361];FAD binding [GO:0071949];farnesylcysteine lyase activity [GO:0102149];prenylcysteine oxidase activity [GO:0001735];chloride transmembrane transport [GO:1902476];prenylated protein catabolic process [GO:0030327];prenylcysteine catabolic process [GO:0030328]	GO:0001735;GO:0005764;GO:0005886;GO:0030327;GO:0030328;GO:0034361;GO:0071949;GO:0102149;GO:1902476	1.8.3.5
0.551247	0.849903	-0.045948	-0.0463715	0.0218258	0.0434265	-0.010685	0.00662613	-0.0170631	0.0799408	-0.0977154	0.052269	0.0138969	0.0365944	0.00351715	0.0173874	Aldedh	+	3.94809	0.0158974	Q9JLJ2	Q9JLJ2	AL9A1_MOUSE	Aldh9a1	4-trimethylaminobutyraldehyde dehydrogenase	3fb_3db;3fb_3ga;3fb_3cb;3fb_3ia;3fb_3fa;3fb_3eb;3fb_ctrl;3fb_3gb;3fb_3bb;3fb_3ba;3fb_3ca;3fb_3aa;3fb_3ab;3fb_3ea;3fb_3da	carnitine biosynthetic process [GO:0045329];carnitine metabolic process [GO:0009437];cellular aldehyde metabolic process [GO:0006081];neurotransmitter biosynthetic process [GO:0042136];protein homotetramerization [GO:0051289]	cytosol [GO:0005829];mitochondrion [GO:0005739]	4-trimethylammoniobutyraldehyde dehydrogenase activity [GO:0047105];aldehyde dehydrogenase (NAD+) activity [GO:0004029];amine binding [GO:0043176];aminobutyraldehyde dehydrogenase activity [GO:0019145];glyceraldehyde-3-phosphate dehydrogenase (NAD+) (non-phosphorylating) activity [GO:0043878];identical protein binding [GO:0042802];NAD binding [GO:0051287];oxidoreductase activity, acting on the al…	cytosol [GO:0005829];mitochondrion [GO:0005739];4-trimethylammoniobutyraldehyde dehydrogenase activity [GO:0047105];aldehyde dehydrogenase (NAD+) activity [GO:0004029];amine binding [GO:0043176];aminobutyraldehyde dehydrogenase activity [GO:0019145];glyceraldehyde-3-phosphate dehydrogenase (NAD+) (non-phosphorylating) activity [GO:0043878];identical protein binding [GO:0042802];NAD binding [GO:00…	GO:0004029;GO:0005739;GO:0005829;GO:0006081;GO:0009437;GO:0016620;GO:0019145;GO:0036094;GO:0042136;GO:0042802;GO:0043176;GO:0043878;GO:0045329;GO:0047105;GO:0051287;GO:0051289	1.2.1.3;1.2.1.47
0.156563	1.56681	0.565536	-0.0514755	0.0775356	0.0126743	0.0609703	-0.332239	0.203013	-0.0623951	-0.079113	0.0291691	0.124973	0.277184	-0.093771	0.0797358	PseudoU_synth_2	+	4.25971	0.0102286	Q14AI6	Q14AI6	RUSD3_MOUSE	Rpusd3	Mitochondrial mRNA pseudouridine synthase Rpusd3	3fb_3cb;3fb_3ia;3fb_3ga;3fb_3db;3fb_3eb;3fb_3ba;3fb_3da;3fb_3bb;3fb_ctrl;3fb_3ea;3fb_3aa;3fb_3fa;3fb_3ca;3fb_3ab;3fb_3ha;3fb_3gb	mRNA processing [GO:0006397];positive regulation of mitochondrial translation [GO:0070131];pseudouridine synthesis [GO:0001522]	mitochondrial matrix [GO:0005759];mitochondrion [GO:0005739];ribonucleoprotein granule [GO:0035770]	pseudouridine synthase activity [GO:0009982];RNA binding [GO:0003723]	mitochondrial matrix [GO:0005759];mitochondrion [GO:0005739];ribonucleoprotein granule [GO:0035770];pseudouridine synthase activity [GO:0009982];RNA binding [GO:0003723];mRNA processing [GO:0006397];positive regulation of mitochondrial translation [GO:0070131];pseudouridine synthesis [GO:0001522]	GO:0001522;GO:0003723;GO:0005739;GO:0005759;GO:0006397;GO:0009982;GO:0035770;GO:0070131	5.4.99.-
0.594952	1.35001	0.475246	0.147652	-0.0206203	0.165413	0.0083046	-0.188707	0.0244408	0.0815887	0.0618629	0.0945702	0.0783215	0.166695	0.0224323	0.00581169	HMGL-like	+	10.2982	0	P38060	P38060	HMGCL_MOUSE	Hmgcl	Hydroxymethylglutaryl-CoA lyase, mitochondrial	3gb_3cb;3ha_3cb;3fb_3cb;3gb_3db;3ha_3db;3fb_3db;3gb_3eb;3ha_3eb;3fb_3eb;3ha_ctrl;3fb_ctrl;3fb_3ia;3fb_3ca;3fb_3ba;3fb_3bb;3fb_3aa;3fb_3da;3fb_3ga;3fb_3fa;3fb_3ea;3fb_3ab;3fb_3gb	acyl-CoA metabolic process [GO:0006637];ketone body biosynthetic process [GO:0046951];leucine catabolic process [GO:0006552];lipid metabolic process [GO:0006629];mitochondrion organization [GO:0007005]	mitochondrial inner membrane [GO:0005743];mitochondrial matrix [GO:0005759];mitochondrion [GO:0005739];peroxisome [GO:0005777];protein-containing complex [GO:0032991]	carboxylic acid binding [GO:0031406];fatty-acyl-CoA binding [GO:0000062];hydroxymethylglutaryl-CoA lyase activity [GO:0004419];magnesium ion binding [GO:0000287];manganese ion binding [GO:0030145];metal ion binding [GO:0046872];structural molecule activity [GO:0005198]	mitochondrial inner membrane [GO:0005743];mitochondrial matrix [GO:0005759];mitochondrion [GO:0005739];peroxisome [GO:0005777];protein-containing complex [GO:0032991];carboxylic acid binding [GO:0031406];fatty-acyl-CoA binding [GO:0000062];hydroxymethylglutaryl-CoA lyase activity [GO:0004419];magnesium ion binding [GO:0000287];manganese ion binding [GO:0030145];metal ion binding [GO:0046872];stru…	GO:0000062;GO:0000287;GO:0004419;GO:0005198;GO:0005739;GO:0005743;GO:0005759;GO:0005777;GO:0006552;GO:0006629;GO:0006637;GO:0007005;GO:0030145;GO:0031406;GO:0032991;GO:0046872;GO:0046951	4.1.3.4
0.428333	-0.293392	-0.0596905	0.42684	-0.104245	-0.202383	-0.301516	-0.291063	-0.129236	0.0511808	0.203039	0.173506	0.0564938	-0.176239	0.756351	0.346107	HlyIII	+	5.04889	0.00393103	Q6TCG2	Q6TCG2	PAQR9_MOUSE	Paqr9	Membrane progesterone receptor epsilon	3ba_3eb;3ba_3cb;3ba_3ab;3ba_3db;3ba_3fb;3ba_3ca;3ba_3ea;3ba_ctrl;3ba_3gb;3ba_3bb;3ba_3da		plasma membrane [GO:0005886]	signaling receptor activity [GO:0038023];steroid binding [GO:0005496]	plasma membrane [GO:0005886];signaling receptor activity [GO:0038023];steroid binding [GO:0005496]	GO:0005496;GO:0005886;GO:0038023
0.154376	-0.185271	0.083333	0.296334	0.0475693	-0.141942	-0.0810881	-0.136826	-0.12272	0.558984	0.640768	0.243808	0.379906	0.0373793	0.46251	0.279016	Amino_oxidase	+	3.95316	0.0162632	P51175	P51175	PPOX_MOUSE	Ppox	Protoporphyrinogen oxidase	3da_3cb;3ga_3cb;3da_3fb;3ga_3fb;3da_3ea;3ga_3ea	heme biosynthetic process [GO:0006783];porphyrin-containing compound biosynthetic process [GO:0006779];protoporphyrinogen IX biosynthetic process [GO:0006782];protoporphyrinogen IX metabolic process [GO:0046501];response to xenobiotic stimulus [GO:0009410]	mitochondrial inner membrane [GO:0005743];mitochondrial membrane [GO:0031966];mitochondrion [GO:0005739]	oxygen-dependent protoporphyrinogen oxidase activity [GO:0004729]	mitochondrial inner membrane [GO:0005743];mitochondrial membrane [GO:0031966];mitochondrion [GO:0005739];oxygen-dependent protoporphyrinogen oxidase activity [GO:0004729];heme biosynthetic process [GO:0006783];porphyrin-containing compound biosynthetic process [GO:0006779];protoporphyrinogen IX biosynthetic process [GO:0006782];protoporphyrinogen IX metabolic process [GO:0046501];response to xeno…	GO:0004729;GO:0005739;GO:0005743;GO:0006779;GO:0006782;GO:0006783;GO:0009410;GO:0031966;GO:0046501	1.3.3.4
1.05713	-0.0578985	-0.0740356	0.261829	-0.336299	-0.376574	-0.200483	-0.160644	-0.012578	-0.0257339	0.584748	0.124455	0.0396605	-0.218507	0.297898	0.718708	adh_short	+	6.18055	0.00104348	P51658	P51658	DHB2_MOUSE	Hsd17b2	Estradiol 17-beta-dehydrogenase 2	3aa_3eb;3ha_3eb;3aa_3ea;3ha_3ea;3aa_ctrl;3ha_ctrl;3aa_3ab;3ha_3ab;3aa_3db;3ha_3db;3aa_3gb;3ha_3gb;3aa_3fb;3ha_3fb;3aa_3cb;3ha_3cb;3aa_3bb;3ha_3bb;3aa_3da;3ha_3da;3ha_3fa;3ha_3ca	androgen biosynthetic process [GO:0006702];androgen metabolic process [GO:0008209];estrogen biosynthetic process [GO:0006703];in utero embryonic development [GO:0001701];placenta development [GO:0001890];response to retinoic acid [GO:0032526];steroid metabolic process [GO:0008202]	endoplasmic reticulum membrane [GO:0005789];intracellular membrane-bounded organelle [GO:0043231]	17-beta-hydroxysteroid dehydrogenase (NAD+) activity [GO:0044594];estradiol 17-beta-dehydrogenase [NAD(P)] activity [GO:0004303];testosterone dehydrogenase (NAD+) activity [GO:0047035]	endoplasmic reticulum membrane [GO:0005789];intracellular membrane-bounded organelle [GO:0043231];17-beta-hydroxysteroid dehydrogenase (NAD+) activity [GO:0044594];estradiol 17-beta-dehydrogenase [NAD(P)] activity [GO:0004303];testosterone dehydrogenase (NAD+) activity [GO:0047035];androgen biosynthetic process [GO:0006702];androgen metabolic process [GO:0008209];estrogen biosynthetic process [GO…	GO:0001701;GO:0001890;GO:0004303;GO:0005789;GO:0006702;GO:0006703;GO:0008202;GO:0008209;GO:0032526;GO:0043231;GO:0044594;GO:0047035	1.1.1.239;1.1.1.62
1.06851	-0.0727377	-0.00829887	0.371105	0.165943	0.00887012	0.229606	0.251271	0.0795307	0.156803	0.389781	0.285185	0.154039	0.00844669	0.425162	0.573816	DER1	+	5.40692	0.00218182	Q99J56	Q99J56	DERL1_MOUSE	Derl1	Derlin-1	3ha_ctrl;3ha_3fb;3ha_3ab;3ha_3bb;3ha_3ca;3ha_3gb;3ha_3eb;3ha_3cb;3ha_3db;3ha_3fa;3ha_3ea;3ha_3da;3ha_3ba	cellular response to unfolded protein [GO:0034620];endoplasmic reticulum unfolded protein response [GO:0030968];ER-associated misfolded protein catabolic process [GO:0071712];ERAD pathway [GO:0036503];positive regulation of protein binding [GO:0032092];positive regulation of protein ubiquitination [GO:0031398];proteasome-mediated ubiquitin-dependent protein catabolic process [GO:0043161];protein …	Derlin-1 retrotranslocation complex [GO:0036513];Derlin-1-VIMP complex [GO:0036502];early endosome [GO:0005769];endoplasmic reticulum [GO:0005783];endoplasmic reticulum membrane [GO:0005789];endoplasmic reticulum quality control compartment [GO:0044322];Hrd1p ubiquitin ligase ERAD-L complex [GO:0000839];late endosome [GO:0005770];membrane [GO:0016020]	ATPase binding [GO:0051117];identical protein binding [GO:0042802];MHC class I protein binding [GO:0042288];misfolded protein binding [GO:0051787];protease binding [GO:0002020];protein-containing complex binding [GO:0044877];signal recognition particle binding [GO:0005047];ubiquitin protein ligase binding [GO:0031625];ubiquitin-specific protease binding [GO:1990381]	Derlin-1 retrotranslocation complex [GO:0036513];Derlin-1-VIMP complex [GO:0036502];early endosome [GO:0005769];endoplasmic reticulum [GO:0005783];endoplasmic reticulum membrane [GO:0005789];endoplasmic reticulum quality control compartment [GO:0044322];Hrd1p ubiquitin ligase ERAD-L complex [GO:0000839];late endosome [GO:0005770];membrane [GO:0016020];ATPase binding [GO:0051117];identical protein…	GO:0000839;GO:0002020;GO:0005047;GO:0005769;GO:0005770;GO:0005783;GO:0005789;GO:0006986;GO:0016020;GO:0030433;GO:0030968;GO:0030970;GO:0031398;GO:0031625;GO:0031648;GO:0032092;GO:0034620;GO:0036502;GO:0036503;GO:0036513;GO:0042288;GO:0042802;GO:0043161;GO:0044322;GO:0044877;GO:0051117;GO:0051787;GO:0071712;GO:1990381
0.826583	0.211739	0.15724	0.354763	0.457264	0.14597	0.499701	0.230052	0.305269	0.175001	0.248317	0.183673	0.217842	0.15563	0.498619	0.526038	ATG_C;Chorein_N	+	7.51921	0	Q6P4T0	Q6P4T0	ATG2A_MOUSE	Atg2a	Autophagy-related protein 2 homolog A	3aa_ctrl;3ha_ctrl;3ha_3gb;3ha_3fb;3ha_3ea;3ha_3bb;3ha_3da;3ha_3ga;3ha_3fa;3ha_3ab;3ha_3ca;3ha_3cb;3ha_3ia	autophagosome assembly [GO:0000045];autophagy of mitochondrion [GO:0000422];late nucleophagy [GO:0044805];piecemeal microautophagy of the nucleus [GO:0034727];positive regulation of autophagosome assembly [GO:2000786];reticulophagy [GO:0061709]	endoplasmic reticulum membrane [GO:0005789];lipid droplet [GO:0005811];organelle membrane contact site [GO:0044232];phagophore assembly site [GO:0000407];phagophore assembly site membrane [GO:0034045]	lipid transfer activity [GO:0120013];phosphatidylinositol-3-phosphate binding [GO:0032266]	endoplasmic reticulum membrane [GO:0005789];lipid droplet [GO:0005811];organelle membrane contact site [GO:0044232];phagophore assembly site [GO:0000407];phagophore assembly site membrane [GO:0034045];lipid transfer activity [GO:0120013];phosphatidylinositol-3-phosphate binding [GO:0032266];autophagosome assembly [GO:0000045];autophagy of mitochondrion [GO:0000422];late nucleophagy [GO:0044805];p…	GO:0000045;GO:0000407;GO:0000422;GO:0005789;GO:0005811;GO:0032266;GO:0034045;GO:0034727;GO:0044232;GO:0044805;GO:0061709;GO:0120013;GO:2000786
0.996893	0.0813961	0.0254383	0.0824986	0.195274	0.113104	0.0864372	-0.075139	0.035284	0.0989227	0.136915	0.594522	0.170864	0.0359421	0.136694	0.266155	GMC_oxred_C;GMC_oxred_N	+	7.02306	0.000235294	Q8BJ64	Q8BJ64	CHDH_MOUSE	Chdh	Choline dehydrogenase, mitochondrial	3ha_3gb;3ha_3cb;3ha_3da;3ha_3ab;3ha_ctrl;3ha_3ea;3ha_3ca;3ha_3db;3ha_3bb;3ha_3fb;3ha_3ga;3ha_3eb;3ha_3ia;3ha_3ba;3ha_3aa;3ha_3fa	glycine betaine biosynthetic process from choline [GO:0019285]	mitochondrial inner membrane [GO:0005743];mitochondrion [GO:0005739]	choline dehydrogenase activity [GO:0008812];flavin adenine dinucleotide binding [GO:0050660]	mitochondrial inner membrane [GO:0005743];mitochondrion [GO:0005739];choline dehydrogenase activity [GO:0008812];flavin adenine dinucleotide binding [GO:0050660];glycine betaine biosynthetic process from choline [GO:0019285]	GO:0005739;GO:0005743;GO:0008812;GO:0019285;GO:0050660	1.1.99.1
0.966789	0.141935	0.11343	0.158073	0.128305	0.173529	-0.0304642	0.0908871	0.151821	0.0896187	0.111729	0.16185	0.143227	0.332596	0.0851936	0.471405	Aldedh	+	4.99162	0.0040678	P24549	P24549	AL1A1_MOUSE	Aldh1a1	Aldehyde dehydrogenase 1A1	3ha_3db;3ha_ctrl;3ha_3cb;3ha_3gb;3ha_3da;3ha_3eb;3ha_3fa;3ha_3ca;3ha_3ea;3ha_3bb;3ha_3ba;3ha_3fb;3ha_3ia;3ha_3ga;3ha_3ab;3ha_3aa	9-cis-retinoic acid biosynthetic process [GO:0042904];9-cis-retinoic acid metabolic process [GO:0042905];apoptotic process [GO:0006915];cellular detoxification of aldehyde [GO:0110095];embryonic eye morphogenesis [GO:0048048];fructosamine catabolic process [GO:0030392];fructose catabolic process [GO:0006001];gamma-aminobutyric acid biosynthetic process [GO:0009449];maintenance of lens transparenc…	axon [GO:0030424];cytoplasm [GO:0005737];cytosol [GO:0005829];nucleus [GO:0005634];synapse [GO:0045202]	3-chloroallyl aldehyde dehydrogenase activity [GO:0004028];3-deoxyglucosone dehydrogenase activity [GO:0106373];aldehyde dehydrogenase (NAD+) activity [GO:0004029];aminobutyraldehyde dehydrogenase activity [GO:0019145];benzaldehyde dehydrogenase (NAD+) activity [GO:0018479];glyceraldehyde-3-phosphate dehydrogenase (NAD+) (non-phosphorylating) activity [GO:0043878];identical protein binding [GO:00…	axon [GO:0030424];cytoplasm [GO:0005737];cytosol [GO:0005829];nucleus [GO:0005634];synapse [GO:0045202];3-chloroallyl aldehyde dehydrogenase activity [GO:0004028];3-deoxyglucosone dehydrogenase activity [GO:0106373];aldehyde dehydrogenase (NAD+) activity [GO:0004029];aminobutyraldehyde dehydrogenase activity [GO:0019145];benzaldehyde dehydrogenase (NAD+) activity [GO:0018479];glyceraldehyde-3-pho…	GO:0001523;GO:0001758;GO:0002072;GO:0002138;GO:0004028;GO:0004029;GO:0005634;GO:0005737;GO:0005829;GO:0006001;GO:0006915;GO:0006979;GO:0009410;GO:0009449;GO:0018479;GO:0019145;GO:0030392;GO:0030424;GO:0036438;GO:0042572;GO:0042573;GO:0042802;GO:0042904;GO:0042905;GO:0043065;GO:0043878;GO:0045202;GO:0045471;GO:0048048;GO:0051287;GO:0106373;GO:0110095;GO:0120163	1.2.1.19;1.2.1.28;1.2.1.3;1.2.1.36
1.21463	0.333657	0.0566025	0.321499	0.045804	-0.327282	0.115612	0.195783	0.0925636	-0.0546131	0.370932	0.458781	-0.00789738	-0.111057	0.108904	0.0897341	GST_C_3;GST_N_3	+	7.30754	0	Q8BWM0	Q8BWM0	PGES2_MOUSE	Ptges2	Prostaglandin E synthase 2	3fb_3ea;3fa_3ea;3ha_3ea;3ha_3ab;3ha_3da;3ha_ctrl;3ha_3eb;3ha_3bb;3ha_3ca;3ha_3aa;3ha_3gb;3ha_3ba;3ha_3db;3ha_3cb;3ha_3ga;3ha_3ia;3ha_3fb;3ha_3fa	lipid metabolic process [GO:0006629];positive regulation of DNA-templated transcription [GO:0045893];prostaglandin biosynthetic process [GO:0001516];secretion [GO:0046903]	cytosol [GO:0005829];Golgi membrane [GO:0000139];mitochondrion [GO:0005739];nucleus [GO:0005634]	12-hydroxyheptadecatrienoic acid synthase activity [GO:0036134];DNA binding [GO:0003677];glutathione binding [GO:0043295];heme binding [GO:0020037];lyase activity [GO:0016829];prostaglandin-E synthase activity [GO:0050220]	cytosol [GO:0005829];Golgi membrane [GO:0000139];mitochondrion [GO:0005739];nucleus [GO:0005634];12-hydroxyheptadecatrienoic acid synthase activity [GO:0036134];DNA binding [GO:0003677];glutathione binding [GO:0043295];heme binding [GO:0020037];lyase activity [GO:0016829];prostaglandin-E synthase activity [GO:0050220];lipid metabolic process [GO:0006629];positive regulation of DNA-templated trans…	GO:0000139;GO:0001516;GO:0003677;GO:0005634;GO:0005739;GO:0005829;GO:0006629;GO:0016829;GO:0020037;GO:0036134;GO:0043295;GO:0045893;GO:0046903;GO:0050220	5.3.99.3
1.19098	0.173182	0.0157166	0.153349	-0.185021	-0.10077	-0.0535717	0.00590706	0.0270481	-0.0794926	-0.0298147	-0.0262012	0.128787	0.0903673	-0.0193815	0.135433	AIRS;AIRS_C	+	4.68199	0.00621538	P97364	P97364	SPS2_MOUSE	Sephs2	Selenide, water dikinase 2	3ha_3eb;3ha_3da;3ha_3ea;3ha_3db;3ha_3ba;3ha_3ca;3ha_ctrl;3ha_3cb;3ha_3ga;3ha_3gb;3ha_3fa;3ha_3bb;3ha_3ia;3ha_3ab;3ha_3aa;3ha_3fb	phosphorylation [GO:0016310];selenium compound metabolic process [GO:0001887];selenocysteine biosynthetic process [GO:0016260]	cytoplasm [GO:0005737]	ATP binding [GO:0005524];metal ion binding [GO:0046872];selenide, water dikinase activity [GO:0004756]	cytoplasm [GO:0005737];ATP binding [GO:0005524];metal ion binding [GO:0046872];selenide, water dikinase activity [GO:0004756];phosphorylation [GO:0016310];selenium compound metabolic process [GO:0001887];selenocysteine biosynthetic process [GO:0016260]	GO:0001887;GO:0004756;GO:0005524;GO:0005737;GO:0016260;GO:0016310;GO:0046872	2.7.9.3
1.23124	0.056241	0.138318	0.612143	-0.172029	0.116972	-0.0825262	0.0893793	0.0680437	0.0809212	0.357089	-0.00547695	0.311096	-0.0386543	-0.0712595	0.118064	ERG2_Sigma1R	+	6.60728	0.000571429	O55242	O55242	SGMR1_MOUSE	Sigmar1	Sigma non-opioid intracellular receptor 1	3ha_3eb;3ha_3fa;3ha_3ca;3ha_3da;3ha_3ea;3ha_3gb;3ha_3ab;3ha_3ba;3ha_ctrl;3ha_3db;3ha_3cb;3ha_3fb;3ha_3aa;3ha_3bb;3ha_3ga	cell death in response to hydrogen peroxide [GO:0036474];lipid transport [GO:0006869];nervous system development [GO:0007399];protein homotrimerization [GO:0070207];regulation of neuron apoptotic process [GO:0043523]	anchoring junction [GO:0070161];cytoplasmic vesicle [GO:0031410];endoplasmic reticulum [GO:0005783];endoplasmic reticulum membrane [GO:0005789];growth cone [GO:0030426];lipid droplet [GO:0005811];membrane [GO:0016020];nuclear envelope [GO:0005635];nuclear inner membrane [GO:0005637];nuclear outer membrane [GO:0005640];postsynaptic density [GO:0014069];postsynaptic density membrane [GO:0098839]	G protein-coupled opioid receptor activity [GO:0004985];identical protein binding [GO:0042802];signaling receptor activity [GO:0038023]	anchoring junction [GO:0070161];cytoplasmic vesicle [GO:0031410];endoplasmic reticulum [GO:0005783];endoplasmic reticulum membrane [GO:0005789];growth cone [GO:0030426];lipid droplet [GO:0005811];membrane [GO:0016020];nuclear envelope [GO:0005635];nuclear inner membrane [GO:0005637];nuclear outer membrane [GO:0005640];postsynaptic density [GO:0014069];postsynaptic density membrane [GO:0098839];G …	GO:0004985;GO:0005635;GO:0005637;GO:0005640;GO:0005783;GO:0005789;GO:0005811;GO:0006869;GO:0007399;GO:0014069;GO:0016020;GO:0030426;GO:0031410;GO:0036474;GO:0038023;GO:0042802;GO:0043523;GO:0070161;GO:0070207;GO:0098839
0.299355	0.250435	0.151115	-0.131144	0.0355349	-0.0550404	-0.0970879	0.0669336	-0.0870209	-0.0416393	-0.00200653	0.0113001	0.162005	0.0254517	0.565306	-0.000372887	His_Phos_2	+	4.05564	0.0140541	Q8BP40	Q8BP40	PPA6_MOUSE	Acp6	Lysophosphatidic acid phosphatase type 6	3ba_3fa;3ba_3db;3ba_3ia;3ba_3ca;3ba_3ga;3ba_3ea;3ba_3aa;3ba_3da;3ba_ctrl;3ba_3ab;3ba_3eb;3ba_3cb;3ba_3gb	dephosphorylation [GO:0016311];hematopoietic progenitor cell differentiation [GO:0002244];lysobisphosphatidic acid metabolic process [GO:2001311];phospholipid metabolic process [GO:0006644]	cytoplasm [GO:0005737];mitochondrion [GO:0005739]	acid phosphatase activity [GO:0003993];lysophosphatidic acid phosphatase activity [GO:0052642]	cytoplasm [GO:0005737];mitochondrion [GO:0005739];acid phosphatase activity [GO:0003993];lysophosphatidic acid phosphatase activity [GO:0052642];dephosphorylation [GO:0016311];hematopoietic progenitor cell differentiation [GO:0002244];lysobisphosphatidic acid metabolic process [GO:2001311];phospholipid metabolic process [GO:0006644]	GO:0002244;GO:0003993;GO:0005737;GO:0005739;GO:0006644;GO:0016311;GO:0052642;GO:2001311	3.1.3.2
0.589281	0.32185	0.126472	0.00437355	-0.0372953	-0.303556	0.0324268	0.0361176	-0.238762	-0.272079	-0.0105162	0.124043	-0.105442	-0.111702	0.00283623	0.0537376	Tubulin;Tubulin_C	+	5.46334	0.00226415	Q7TMM9	Q7TMM9;Q9CWF2	TBB2A_MOUSE	Tubb2a	Tubulin beta-2A chain	3db_3ea;3gb_3ea;3fa_3ea;3fb_3ea;3ha_3ea;3fb_3da;3ha_3da;3ha_3ca;3ha_3eb;3ha_3ab;3ha_3bb;3ha_3ga;3ha_ctrl;3ha_3cb	cerebral cortex development [GO:0021987];microtubule cytoskeleton organization [GO:0000226];mitotic cell cycle [GO:0000278]	cytoplasm [GO:0005737];intercellular bridge [GO:0045171];microtubule [GO:0005874];microtubule cytoskeleton [GO:0015630];mitotic spindle [GO:0072686]	GTP binding [GO:0005525];GTPase activity [GO:0003924];metal ion binding [GO:0046872];structural constituent of cytoskeleton [GO:0005200]	cytoplasm [GO:0005737];intercellular bridge [GO:0045171];microtubule [GO:0005874];microtubule cytoskeleton [GO:0015630];mitotic spindle [GO:0072686];GTP binding [GO:0005525];GTPase activity [GO:0003924];metal ion binding [GO:0046872];structural constituent of cytoskeleton [GO:0005200];cerebral cortex development [GO:0021987];microtubule cytoskeleton organization [GO:0000226];mitotic cell cycle [G…	GO:0000226;GO:0000278;GO:0003924;GO:0005200;GO:0005525;GO:0005737;GO:0005874;GO:0015630;GO:0021987;GO:0045171;GO:0046872;GO:0072686
0.580505	0.0138111	-0.129015	-0.0437927	-0.0181847	-0.415812	0.0156059	-0.188801	-0.158758	-0.357235	0.0575848	-0.0898151	-0.0797901	-0.178617	-0.0580807	-0.0336323	Tubulin;Tubulin_C	+	4.83872	0.0047619	P68372	P99024;Q9D6F9;P68372	TBB4B_MOUSE	Tubb4b	Tubulin beta-4B chain	3ga_3ea;3fb_3ea;3ha_3ea;3ha_3da;3ha_3cb;3ha_3ab;3ha_3ca;3ha_3eb;3ha_ctrl;3ha_3gb;3ha_3fa;3ha_3bb;3ha_3aa;3ha_3ba;3ha_3db	microtubule cytoskeleton organization [GO:0000226];microtubule-based process [GO:0007017];mitotic cell cycle [GO:0000278]	cytoplasm [GO:0005737];intercellular bridge [GO:0045171];microtubule [GO:0005874];microtubule cytoskeleton [GO:0015630];mitotic spindle [GO:0072686];myelin sheath [GO:0043209];tubulin complex [GO:0045298]	double-stranded RNA binding [GO:0003725];GTP binding [GO:0005525];GTPase activity [GO:0003924];metal ion binding [GO:0046872];structural constituent of cytoskeleton [GO:0005200]	cytoplasm [GO:0005737];intercellular bridge [GO:0045171];microtubule [GO:0005874];microtubule cytoskeleton [GO:0015630];mitotic spindle [GO:0072686];myelin sheath [GO:0043209];tubulin complex [GO:0045298];double-stranded RNA binding [GO:0003725];GTP binding [GO:0005525];GTPase activity [GO:0003924];metal ion binding [GO:0046872];structural constituent of cytoskeleton [GO:0005200];microtubule cyto…	GO:0000226;GO:0000278;GO:0003725;GO:0003924;GO:0005200;GO:0005525;GO:0005737;GO:0005874;GO:0007017;GO:0015630;GO:0043209;GO:0045171;GO:0045298;GO:0046872;GO:0072686
0.534803	0.174888	0.0519047	0.280211	-0.742273	0.144352	-0.0272045	-0.0568933	-0.171238	-0.0460491	0.134477	0.122388	-0.134908	0.179251	0.00737	0.157438	PEX11	+	3.56069	0.0287273	Q6P6M5	Q6P6M5	PX11C_MOUSE	Pex11g	Peroxisomal membrane protein 11C	3cb_3eb;3bb_3eb;3gb_3eb;3db_3eb;3da_3eb;3ba_3eb;3ea_3eb;3ab_3eb;3fa_3eb;ctrl_3eb;3ga_3eb;3fb_3eb;3aa_3eb;3ia_3eb;3ha_3eb	peroxisome fission [GO:0016559];regulation of peroxisome size [GO:0044375]	peroxisomal membrane [GO:0005778];peroxisome [GO:0005777];protein-containing complex [GO:0032991]		peroxisomal membrane [GO:0005778];peroxisome [GO:0005777];protein-containing complex [GO:0032991];peroxisome fission [GO:0016559];regulation of peroxisome size [GO:0044375]	GO:0005777;GO:0005778;GO:0016559;GO:0032991;GO:0044375
0.728197	0.0741825	0.126898	0.224554	-0.10951	0.129194	0.00617504	-0.00543213	-0.2451	0.0030098	0.2816	0.171886	-0.0228252	0.388347	0.246489	0.954685	Thioredoxin	+	6.17139	0.00102128	Q9D710	Q9D710	TMX2_MOUSE	Tmx2	Thioredoxin-related transmembrane protein 2	3ha_3ca;3aa_3ca;3ha_3db;3aa_3db;3ha_3eb;3aa_3eb;3ha_ctrl;3aa_ctrl;3ha_3bb;3aa_3bb;3ha_3da;3aa_3da;3ha_3fb;3aa_3fb;3ha_3gb;3aa_3gb;3ha_3cb;3aa_3cb;3aa_3fa;3aa_3ia;3aa_3ga;3aa_3ba	brain development [GO:0007420]	endoplasmic reticulum membrane [GO:0005789];membrane-bounded organelle [GO:0043227];mitochondria-associated endoplasmic reticulum membrane [GO:0044233];mitochondrial membrane [GO:0031966];mitochondrion [GO:0005739]	disulfide oxidoreductase activity [GO:0015036];identical protein binding [GO:0042802]	endoplasmic reticulum membrane [GO:0005789];membrane-bounded organelle [GO:0043227];mitochondria-associated endoplasmic reticulum membrane [GO:0044233];mitochondrial membrane [GO:0031966];mitochondrion [GO:0005739];disulfide oxidoreductase activity [GO:0015036];identical protein binding [GO:0042802];brain development [GO:0007420]	GO:0005739;GO:0005789;GO:0007420;GO:0015036;GO:0031966;GO:0042802;GO:0043227;GO:0044233
0.449821	0.298407	0.290865	0.353464	0.00402832	-0.0321369	-0.0278492	-0.0618401	-0.0296783	0.0175915	0.722483	0.175203	0.04459	-0.00573921	0.235243	0.295725	Acyl-CoA_dh_1;Acyl-CoA_dh_M;Acyl-CoA_dh_N	+	6.68522	0.0006	P50544	P50544	ACADV_MOUSE	Acadvl	Very long-chain specific acyl-CoA dehydrogenase, mitochondrial	3ia_3ea;3ha_3ea;3ga_3ea;3ga_ctrl;3ga_3db;3ha_3cb;3ga_3cb;3ga_3ca;3ga_3ab;3ga_3da;3ga_3eb;3ga_3bb;3ga_3fa;3ga_3aa	epithelial cell differentiation [GO:0030855];fatty acid beta-oxidation [GO:0006635];fatty acid beta-oxidation using acyl-CoA dehydrogenase [GO:0033539];fatty acid catabolic process [GO:0009062];negative regulation of fatty acid biosynthetic process [GO:0045717];negative regulation of fatty acid oxidation [GO:0046322];regulation of cholesterol metabolic process [GO:0090181];response to cold [GO:00…	extrinsic component of mitochondrial inner membrane [GO:0031314];mitochondrial inner membrane [GO:0005743];mitochondrial membrane [GO:0031966];mitochondrial nucleoid [GO:0042645];mitochondrion [GO:0005739];nucleolus [GO:0005730];nucleoplasm [GO:0005654]	acyl-CoA dehydrogenase activity [GO:0003995];fatty-acyl-CoA binding [GO:0000062];flavin adenine dinucleotide binding [GO:0050660];identical protein binding [GO:0042802];long-chain-acyl-CoA dehydrogenase activity [GO:0004466];very-long-chain-acyl-CoA dehydrogenase activity [GO:0017099]	extrinsic component of mitochondrial inner membrane [GO:0031314];mitochondrial inner membrane [GO:0005743];mitochondrial membrane [GO:0031966];mitochondrial nucleoid [GO:0042645];mitochondrion [GO:0005739];nucleolus [GO:0005730];nucleoplasm [GO:0005654];acyl-CoA dehydrogenase activity [GO:0003995];fatty-acyl-CoA binding [GO:0000062];flavin adenine dinucleotide binding [GO:0050660];identical prote…	GO:0000062;GO:0001659;GO:0003995;GO:0004466;GO:0005654;GO:0005730;GO:0005739;GO:0005743;GO:0006635;GO:0009062;GO:0009409;GO:0017099;GO:0030855;GO:0031314;GO:0031966;GO:0033539;GO:0042645;GO:0042802;GO:0045717;GO:0046322;GO:0050660;GO:0090181	1.3.8.9
0.218344	0.226042	0.102436	0.375034	0.114983	-0.105627	0.137375	0.116344	0.134434	0.0574913	0.184502	0.083168	0.195103	0.131611	0.16374	0.272943	Ribosomal_S8	+	3.7176	0.0220476	P62245	P62245	RS15A_MOUSE	Rps15a	40S ribosomal protein S15a	3bb_3ea;3aa_3ea;3ia_3ea;3ia_3fa;3ia_ctrl	cytoplasmic translation [GO:0002181];positive regulation of cell cycle [GO:0045787];positive regulation of cell population proliferation [GO:0008284];response to virus [GO:0009615];ribosomal small subunit biogenesis [GO:0042274];translation at postsynapse [GO:0140242];translation at presynapse [GO:0140236]	cytoplasm [GO:0005737];cytosol [GO:0005829];cytosolic ribosome [GO:0022626];cytosolic small ribosomal subunit [GO:0022627];mitochondrion [GO:0005739];postsynapse [GO:0098794];presynapse [GO:0098793];ribosome [GO:0005840];small-subunit processome [GO:0032040];synapse [GO:0045202]	structural constituent of ribosome [GO:0003735]	cytoplasm [GO:0005737];cytosol [GO:0005829];cytosolic ribosome [GO:0022626];cytosolic small ribosomal subunit [GO:0022627];mitochondrion [GO:0005739];postsynapse [GO:0098794];presynapse [GO:0098793];ribosome [GO:0005840];small-subunit processome [GO:0032040];synapse [GO:0045202];structural constituent of ribosome [GO:0003735];cytoplasmic translation [GO:0002181];positive regulation of cell cycle …	GO:0002181;GO:0003735;GO:0005737;GO:0005739;GO:0005829;GO:0005840;GO:0008284;GO:0009615;GO:0022626;GO:0022627;GO:0032040;GO:0042274;GO:0045202;GO:0045787;GO:0098793;GO:0098794;GO:0140236;GO:0140242
0.498762	-0.0105495	0.246902	0.588793	-0.150478	-0.00603199	0.17003	0.12079	0.140121	0.24757	0.465532	0.172565	0.229962	0.118793	0.245251	0.46529	Steroid_dh	+	5.42105	0.00222222	Q9CY27	Q9CY27	TECR_MOUSE	Tecr	Very-long-chain enoyl-CoA reductase	3aa_3eb;3ga_3eb;3ha_3eb;3ia_3eb;3ha_3ea;3ia_3ea;3ha_ctrl;3ia_ctrl;3ia_3ab;3ia_3fb;3ia_3db;3ia_3cb;3ia_3ca	fatty acid elongation [GO:0030497];sphingolipid metabolic process [GO:0006665];steroid biosynthetic process [GO:0006694];very long-chain fatty acid biosynthetic process [GO:0042761]	endoplasmic reticulum [GO:0005783];endoplasmic reticulum membrane [GO:0005789]	oxidoreductase activity [GO:0016491];very-long-chain enoyl-CoA reductase activity [GO:0102758]	endoplasmic reticulum [GO:0005783];endoplasmic reticulum membrane [GO:0005789];oxidoreductase activity [GO:0016491];very-long-chain enoyl-CoA reductase activity [GO:0102758];fatty acid elongation [GO:0030497];sphingolipid metabolic process [GO:0006665];steroid biosynthetic process [GO:0006694];very long-chain fatty acid biosynthetic process [GO:0042761]	GO:0005783;GO:0005789;GO:0006665;GO:0006694;GO:0016491;GO:0030497;GO:0042761;GO:0102758	1.3.1.93
0.533103	-0.00365734	0.181191	0.395783	-0.0137939	-0.128009	0.080781	0.0505171	0.119624	0.130377	0.320247	0.252259	0.0984573	-0.0431023	0.206885	0.468219	AMP-binding;AMP-binding_C	+	8.01702	0	O35488	O35488	S27A2_MOUSE	Slc27a2	Long-chain fatty acid transport protein 2	3ga_3ea;3ia_3ea;3aa_3ea;3ha_3ea;3ga_3eb;3ia_3eb;3aa_3eb;3ha_3eb;3ga_3ab;3ia_3ab;3aa_3ab;3ha_3ab;3aa_3fb;3ha_3fb;3aa_3db;3ha_3db;3aa_3cb;3ha_3cb;3aa_ctrl;3ha_ctrl;3ha_3bb;3ha_3da;3ha_3ca;3ha_3ba;3ha_3gb;3ha_3fa	bile acid biosynthetic process [GO:0006699];fatty acid alpha-oxidation [GO:0001561];fatty acid beta-oxidation [GO:0006635];fatty acid transport [GO:0015908];long-chain fatty acid import into cell [GO:0044539];long-chain fatty acid metabolic process [GO:0001676];methyl-branched fatty acid metabolic process [GO:0097089];very long-chain fatty acid catabolic process [GO:0042760];very long-chain fatty…	endoplasmic reticulum [GO:0005783];endoplasmic reticulum lumen [GO:0005788];endoplasmic reticulum membrane [GO:0005789];intracellular membrane-bounded organelle [GO:0043231];mitochondrion [GO:0005739];peroxisomal membrane [GO:0005778];peroxisome [GO:0005777];plasma membrane [GO:0005886]	arachidonate-CoA ligase activity [GO:0047676];ATP binding [GO:0005524];cholate-CoA ligase activity [GO:0047747];enzyme binding [GO:0019899];fatty acid transmembrane transporter activity [GO:0015245];long-chain fatty acid transporter activity [GO:0005324];long-chain fatty acid-CoA ligase activity [GO:0004467];oleate transmembrane transporter activity [GO:1901480];phytanate-CoA ligase activity [GO:…	endoplasmic reticulum [GO:0005783];endoplasmic reticulum lumen [GO:0005788];endoplasmic reticulum membrane [GO:0005789];intracellular membrane-bounded organelle [GO:0043231];mitochondrion [GO:0005739];peroxisomal membrane [GO:0005778];peroxisome [GO:0005777];plasma membrane [GO:0005886];arachidonate-CoA ligase activity [GO:0047676];ATP binding [GO:0005524];cholate-CoA ligase activity [GO:0047747]…	GO:0000038;GO:0001561;GO:0001676;GO:0004467;GO:0005324;GO:0005524;GO:0005739;GO:0005777;GO:0005778;GO:0005783;GO:0005788;GO:0005789;GO:0005886;GO:0006635;GO:0006699;GO:0015245;GO:0015908;GO:0019899;GO:0031957;GO:0042760;GO:0043231;GO:0044539;GO:0047676;GO:0047747;GO:0050197;GO:0070251;GO:0097089;GO:1901480	6.2.1.-;6.2.1.15;6.2.1.24;6.2.1.3;6.2.1.7
0.436239	-0.0460281	-0.0311241	0.0341644	-0.0979919	0.00139904	-0.0758562	-0.0532827	-0.115519	-0.0568409	0.0595112	0.019556	-0.114247	-0.0350676	0.0155811	0.290123	ADH_zinc_N	+	3.8031	0.0201	Q8VDQ1	Q8VDQ1	PTGR2_MOUSE	Ptgr2	Prostaglandin reductase 2	3ha_3eb;3ha_3bb;3ha_3cb;3ha_3ca;3ha_3fb;3ha_ctrl;3ha_3db;3ha_3fa;3ha_3ba;3ha_3da;3ha_3ia;3ha_3ea;3ha_3ab;3ha_3ga	prostaglandin metabolic process [GO:0006693]	cytosol [GO:0005829];mitochondrion [GO:0005739]	13-prostaglandin reductase activity [GO:0036132];15-oxoprostaglandin 13-oxidase activity [GO:0047522]	cytosol [GO:0005829];mitochondrion [GO:0005739];13-prostaglandin reductase activity [GO:0036132];15-oxoprostaglandin 13-oxidase activity [GO:0047522];prostaglandin metabolic process [GO:0006693]	GO:0005739;GO:0005829;GO:0006693;GO:0036132;GO:0047522	1.3.1.48
0.3289	-0.134787	-0.0344362	0.391081	-0.0938568	-0.100357	-0.10527	-0.0455618	-0.167509	0.0176191	0.290886	0.0771093	0.00196743	-0.0899887	0.136903	0.334404	ApoB100_C;DUF1081;DUF1943;Vitellogenin_N	+	4.47758	0.00806061	E9Q414	E9Q414	APOB_MOUSE	Apob	Apolipoprotein B-100	3ia_3ea;3ia_3ab;3ia_3ca;3ia_3db;3ia_3fb;3ia_3gb;3ia_3fa	artery morphogenesis [GO:0048844];cellular response to prostaglandin stimulus [GO:0071379];cellular response to tumor necrosis factor [GO:0071356];cholesterol efflux [GO:0033344];cholesterol homeostasis [GO:0042632];cholesterol metabolic process [GO:0008203];cholesterol transport [GO:0030301];establishment of localization in cell [GO:0051649];fertilization [GO:0009566];flagellated sperm motility …	chylomicron [GO:0042627];cytoplasm [GO:0005737];cytosol [GO:0005829];endoplasmic reticulum [GO:0005783];endoplasmic reticulum exit site [GO:0070971];extracellular region [GO:0005576];extracellular space [GO:0005615];high-density lipoprotein particle [GO:0034364];intermediate-density lipoprotein particle [GO:0034363];intracellular membrane-bounded organelle [GO:0043231];lipid droplet [GO:0005811];…	cholesterol transfer activity [GO:0120020];heparin binding [GO:0008201];lipase binding [GO:0035473];low-density lipoprotein particle receptor binding [GO:0050750];phospholipid binding [GO:0005543]	chylomicron [GO:0042627];cytoplasm [GO:0005737];cytosol [GO:0005829];endoplasmic reticulum [GO:0005783];endoplasmic reticulum exit site [GO:0070971];extracellular region [GO:0005576];extracellular space [GO:0005615];high-density lipoprotein particle [GO:0034364];intermediate-density lipoprotein particle [GO:0034363];intracellular membrane-bounded organelle [GO:0043231];lipid droplet [GO:0005811];…	GO:0001701;GO:0005543;GO:0005576;GO:0005615;GO:0005737;GO:0005783;GO:0005811;GO:0005829;GO:0006629;GO:0006642;GO:0007283;GO:0007399;GO:0008201;GO:0008203;GO:0009566;GO:0009615;GO:0009743;GO:0009791;GO:0010269;GO:0010628;GO:0010744;GO:0010884;GO:0010886;GO:0012506;GO:0016042;GO:0019433;GO:0030301;GO:0030317;GO:0031983;GO:0032355;GO:0032496;GO:0033344;GO:0034359;GO:0034361;GO:0034362;GO:0034363;GO:…
-0.159691	-0.229095	-0.0358229	0.742094	-0.0549278	-0.338551	-0.248968	0.0215015	-0.138117	-0.103814	-0.05972	-0.0557671	-0.16681	-0.162502	-0.0907412	-0.0120049	EMP70	+	4.20686	0.0109859	Q9ET30	Q9ET30	TM9S3_MOUSE	Tm9sf3	Transmembrane 9 superfamily member 3	3ia_3ea;3ia_3eb;3ia_3ca;3ia_3fb;3ia_3ab;3ia_3ha;3ia_3bb;3ia_3db;3ia_3ga;3ia_3ba;3ia_3da;3ia_3gb;3ia_3fa;3ia_ctrl;3ia_3cb;3ia_3aa	protein localization to membrane [GO:0072657]	membrane [GO:0016020]		membrane [GO:0016020];protein localization to membrane [GO:0072657]	GO:0016020;GO:0072657
-0.0421791	-0.138718	0.0838089	0.570555	-0.154459	-0.214176	-0.121662	0.00741005	-0.188522	-0.204363	0.335632	-0.257389	-0.112095	0.012104	-0.00887871	0.0533638	COesterase	+	4.2878	0.010029	Q91WU0	Q91WU0	EST1F_MOUSE	Ces1f	Carboxylesterase 1F	3ia_3fa;3ia_3da;3ia_3fb;3ia_3eb;3ia_3db;3ia_3ca;3ia_3ea;3ia_3ba;3ia_ctrl;3ia_3ha;3ia_3bb;3ia_3cb;3ia_3ab	cellular response to cholesterol [GO:0071397];cellular response to low-density lipoprotein particle stimulus [GO:0071404];cholesterol biosynthetic process [GO:0006695];cholesterol homeostasis [GO:0042632];cholesterol metabolic process [GO:0008203];epithelial cell differentiation [GO:0030855];lipid catabolic process [GO:0016042];medium-chain fatty acid metabolic process [GO:0051791];negative regul…	cytoplasm [GO:0005737];cytosol [GO:0005829];endoplasmic reticulum [GO:0005783];intracellular membrane-bounded organelle [GO:0043231];lipid droplet [GO:0005811]	all-trans-retinyl-palmitate hydrolase, all-trans-retinol forming activity [GO:0047376];carboxylesterase activity [GO:0106435];carboxylic ester hydrolase activity [GO:0052689];retinyl-palmitate esterase activity [GO:0050253];sterol esterase activity [GO:0004771]	cytoplasm [GO:0005737];cytosol [GO:0005829];endoplasmic reticulum [GO:0005783];intracellular membrane-bounded organelle [GO:0043231];lipid droplet [GO:0005811];all-trans-retinyl-palmitate hydrolase, all-trans-retinol forming activity [GO:0047376];carboxylesterase activity [GO:0106435];carboxylic ester hydrolase activity [GO:0052689];retinyl-palmitate esterase activity [GO:0050253];sterol esterase…	GO:0004771;GO:0005737;GO:0005783;GO:0005811;GO:0005829;GO:0006695;GO:0008203;GO:0010875;GO:0010887;GO:0016042;GO:0019626;GO:0030855;GO:0042632;GO:0043231;GO:0043691;GO:0047376;GO:0050253;GO:0051791;GO:0052689;GO:0070857;GO:0071397;GO:0071404;GO:0090205;GO:0106435;GO:0120188	3.1.1.1
-0.160435	-0.154903	-0.0555735	-0.0531731	-0.0927286	-0.283838	-4.76837E-05	-0.0489874	-0.110516	0.581226	0.0334902	-0.348715	-0.138103	-0.376709	-0.0710526	-0.0358505	Oxidored_q6	+	3.74623	0.021253	Q9DC70	Q9DC70	NDUS7_MOUSE	Ndufs7	NADH dehydrogenase [ubiquinone] iron-sulfur protein 7, mitochondrial	3da_3ea;3da_3fa;3da_3ha;3da_3ab;3da_3bb;3da_3eb;3da_3fb;3da_3ca;3da_3gb;3da_3ga;3da_3ba;3da_ctrl;3da_3db;3da_3cb	aerobic respiration [GO:0009060];electron transport coupled proton transport [GO:0015990];mitochondrial electron transport, NADH to ubiquinone [GO:0006120];mitochondrial respiratory chain complex I assembly [GO:0032981];proton motive force-driven mitochondrial ATP synthesis [GO:0042776]	mitochondrial inner membrane [GO:0005743];mitochondrial respiratory chain complex I [GO:0005747];mitochondrion [GO:0005739];neuron projection [GO:0043005];neuronal cell body [GO:0043025];synaptic membrane [GO:0097060]	4 iron, 4 sulfur cluster binding [GO:0051539];metal ion binding [GO:0046872];NADH dehydrogenase (ubiquinone) activity [GO:0008137];NADH dehydrogenase activity [GO:0003954];protease binding [GO:0002020];quinone binding [GO:0048038]	mitochondrial inner membrane [GO:0005743];mitochondrial respiratory chain complex I [GO:0005747];mitochondrion [GO:0005739];neuron projection [GO:0043005];neuronal cell body [GO:0043025];synaptic membrane [GO:0097060];4 iron, 4 sulfur cluster binding [GO:0051539];metal ion binding [GO:0046872];NADH dehydrogenase (ubiquinone) activity [GO:0008137];NADH dehydrogenase activity [GO:0003954];protease …	GO:0002020;GO:0003954;GO:0005739;GO:0005743;GO:0005747;GO:0006120;GO:0008137;GO:0009060;GO:0015990;GO:0032981;GO:0042776;GO:0043005;GO:0043025;GO:0046872;GO:0048038;GO:0051539;GO:0097060	7.1.1.2
[truncated: 3 more rows]
