# Supplementary material for: A general approach for activity-based protein profiling of oxidoreductases with redox-differentiated diarylhalonium warheads
Source: Chem Sci. 2025 Mar 11;16(15):6240–56. doi: 10.1039/d4sc08454c (PMC11912224; doi:10.1039/d4sc08454c)
Supplement: SC-016-D4SC08454C-s003 [file SC-016-D4SC08454C-s003.xlsx]

## Sheet: Structural Overview
Residual modification after copper-click and acidic elution of probed peptides
3aa	iodonium				3ha	chloronium
3ga	bromonium

## Sheet: 3aa_modified peptides
Peptide Sequence	Modified Sequence	Prev AA	Next AA	Start	End	Peptide Length	Charges	Assigned Modifications	Protein	Protein ID	Entry Name	Gene	Protein Description	Mapped Genes	Mapped Proteins	IBC_202406_acidicEl_DDA_1a1_GE6_1_4480 Spectral Count	IBC_202406_acidicEl_DDA_1a2_GC2_1_4457 Spectral Count	IBC_202406_acidicEl_DDA_1a3_GC6_1_4461 Spectral Count	IBC_202406_acidicEl_DDA_1a4_GD2_1_4465 Spectral Count	IBC_202406_acidicEl_DDA_1a5_GD6_1_4469 Spectral Count	IBC_202406_acidicEl_DDA_1a6_GE2_1_4476 Spectral Count	IBC_202406_acidicEl_DDA_no1_GE5_1_4479 Spectral Count	IBC_202406_acidicEl_DDA_no2_GC1_1_4456 Spectral Count	IBC_202406_acidicEl_DDA_no3_GC5_1_4460 Spectral Count	IBC_202406_acidicEl_DDA_no4_GD1_1_4464 Spectral Count	IBC_202406_acidicEl_DDA_no5_GD5_1_4468 Spectral Count	IBC_202406_acidicEl_DDA_no6_GE1_1_4475 Spectral Count	IBC_202406_acidicEl_DDA_1a1_GE6_1_4480 Intensity	IBC_202406_acidicEl_DDA_1a2_GC2_1_4457 Intensity	IBC_202406_acidicEl_DDA_1a3_GC6_1_4461 Intensity	IBC_202406_acidicEl_DDA_1a4_GD2_1_4465 Intensity	IBC_202406_acidicEl_DDA_1a5_GD6_1_4469 Intensity	IBC_202406_acidicEl_DDA_1a6_GE2_1_4476 Intensity	IBC_202406_acidicEl_DDA_no1_GE5_1_4479 Intensity	IBC_202406_acidicEl_DDA_no2_GC1_1_4456 Intensity	IBC_202406_acidicEl_DDA_no3_GC5_1_4460 Intensity	IBC_202406_acidicEl_DDA_no4_GD1_1_4464 Intensity	IBC_202406_acidicEl_DDA_no5_GD5_1_4468 Intensity	IBC_202406_acidicEl_DDA_no6_GE1_1_4475 Intensity	IBC_202406_acidicEl_DDA_1a1_GE6_1_4480 MaxLFQ Intensity	IBC_202406_acidicEl_DDA_1a2_GC2_1_4457 MaxLFQ Intensity	IBC_202406_acidicEl_DDA_1a3_GC6_1_4461 MaxLFQ Intensity	IBC_202406_acidicEl_DDA_1a4_GD2_1_4465 MaxLFQ Intensity	IBC_202406_acidicEl_DDA_1a5_GD6_1_4469 MaxLFQ Intensity	IBC_202406_acidicEl_DDA_1a6_GE2_1_4476 MaxLFQ Intensity	IBC_202406_acidicEl_DDA_no1_GE5_1_4479 MaxLFQ Intensity	IBC_202406_acidicEl_DDA_no2_GC1_1_4456 MaxLFQ Intensity	IBC_202406_acidicEl_DDA_no3_GC5_1_4460 MaxLFQ Intensity	IBC_202406_acidicEl_DDA_no4_GD1_1_4464 MaxLFQ Intensity
AADKDTCFSTEGPNLVTR	AADKDT[384.2525]CFSTEGPNLVTR	K	C	585	602	18	4	6T(384.2525)	sp|P07724|ALBU_MOUSE	P07724	ALBU_MOUSE	Alb	Albumin			0	0	0	0	0	1	0	0	0	0	0	0	0	0	0	0	0	1063.19	0	0	0	0	0	0	0	0	0	0	0	0	0	0	0	0
AAGCDFNNVVK	AAGC[384.2525]DFNNVVK	K	T	68	78	11	3	4C(384.2525)	sp|P52760|RIDA_MOUSE	P52760	RIDA_MOUSE	Rida	2-iminobutanoate/2-iminopropanoate deaminase			0	0	0	0	0	1	0	0	0	0	0	0	0	0	0	0	0	6718.39	0	0	0	0	0	0	0	0	0	0	0	0	0	0	0	0
AAGCDFNNVVK	AAG[384.2525]CDFNNVVK	K	T	68	78	11	3	3G(384.2525)	sp|P52760|RIDA_MOUSE	P52760	RIDA_MOUSE	Rida	2-iminobutanoate/2-iminopropanoate deaminase			0	0	0	0	1	1	0	0	0	0	0	0	0	0	0	0	4477.29	6820.56	0	0	0	0	0	0	0	0	0	0	4477.29	6820.56	0	0	0	0
AAICSGK	AAIC[384.2525]SGK	R	V	19	25	7	2	4C(384.2525)	sp|P16858|G3P_MOUSE	P16858	G3P_MOUSE	Gapdh	Glyceraldehyde-3-phosphate dehydrogenase			0	2	0	0	5	1	0	0	0	0	0	0	0	11782.5	10115.8	0	15483.9	21001.9	0	0	0	0	0	0	0	11782.5	10115.8	0	15483.9	21001.9	0	0	0	0
AADKDTCFSTEGPNLVTR	A[384.2525]ADKDTCFSTEGPNLVTR	K	C	585	602	18	4	1A(384.2525)	sp|P07724|ALBU_MOUSE	P07724	ALBU_MOUSE	Alb	Albumin			0	0	0	0	2	1	0	0	0	0	0	0	0	0	0	0	1526.79	1148.25	0	0	0	0	0	0	0	0	0	0	1526.79	1148.25	0	0	0	0
AAGCDFNNVVK	A[384.2525]AGCDFNNVVK	K	T	68	78	11	3	1A(384.2525)	sp|P52760|RIDA_MOUSE	P52760	RIDA_MOUSE	Rida	2-iminobutanoate/2-iminopropanoate deaminase			0	0	0	0	1	0	0	0	0	0	0	0	0	0	0	0	4511.98	0	0	0	0	0	0	0	0	0	0	0	0	0	0	0	0	0
CCSGSLVER	C[384.2525]C[125.0477]SGSLVER	K	R	500	508	9	2	1C(384.2525),2C(125.0477)	sp|P07724|ALBU_MOUSE	P07724	ALBU_MOUSE	Alb	Albumin			0	0	0	0	0	1	0	0	0	0	0	0	0	0	0	0	0	4433.41	0	0	0	0	0	0	0	0	0	0	0	0	0	0	0	0
CDPNDQNP	C[384.2525]DPNDQNP	K	-	350	357	8	2	1C(384.2525)	sp|Q64442|DHSO_MOUSE	Q64442	DHSO_MOUSE	Sord	Sorbitol dehydrogenase			0	4	4	0	2	2	0	0	0	0	0	0	0	12897.5	14411.8	0	14668.8	17253.9	0	0	0	0	0	0	0	12897.5	14411.8	0	14668.8	17253.9	0	0	0	0
CLGLTEAQTR	C[384.2525]LGLTEAQTR	K	E	920	929	10	2	1C(384.2525)	sp|Q8C196|CPSM_MOUSE	Q8C196	CPSM_MOUSE	Cps1	Carbamoyl-phosphate synthase [ammonia], mitochondrial			0	0	0	0	0	2	0	0	0	0	0	0	0	0	0	0	0	6656.19	0	0	0	0	0	0	0	0	0	0	0	0	0	0	0	0
CMALSTAILVGEAK	C[384.2525]MALSTAILVGEAK	R	K	317	330	14	3	1C(384.2525)	sp|Q9EQ20|MMSA_MOUSE	Q9EQ20	MMSA_MOUSE	Aldh6a1	Methylmalonate-semialdehyde/malonate-semialdehyde dehydrogenase [acylating], mitochondrial			0	0	9	11	12	17	0	0	0	0	0	0	0	0	13151.3	5362.62	12411.4	10677.7	0	0	0	0	0	0	0	0	13151.3	5362.62	12411.4	10677.7	0	0	0	0
CMALSTAILVGEAK	C[384.2525]M[15.9949]ALSTAILVGEAK	R	K	317	330	14	3	1C(384.2525),2M(15.9949)	sp|Q9EQ20|MMSA_MOUSE	Q9EQ20	MMSA_MOUSE	Aldh6a1	Methylmalonate-semialdehyde/malonate-semialdehyde dehydrogenase [acylating], mitochondrial			0	0	2	0	0	1	0	0	0	0	0	0	0	0	5024.84	0	3574.86	3107.3	0	0	0	0	0	0	0	0	5024.84	0	3574.86	3107.3	0	0	0	0
DFTPVCTTELGR	DFTPVC[384.2525]TTELGR	R	A	42	53	12	3	6C(384.2525)	sp|O08709|PRDX6_MOUSE	O08709	PRDX6_MOUSE	Prdx6	Peroxiredoxin-6			0	0	0	0	0	3	0	0	0	0	0	0	0	0	1449.82	0	0	6724.88	0	0	0	0	0	0	0	0	1449.82	0	0	6724.88	0	0	0	0
DFTPVCTTELGR	DFTPV[384.2525]CTTELGR	R	A	42	53	12	3	5V(384.2525)	sp|O08709|PRDX6_MOUSE	O08709	PRDX6_MOUSE	Prdx6	Peroxiredoxin-6			0	0	0	0	0	1	0	0	0	0	0	0	0	0	0	0	0	6472.55	0	0	0	0	0	0	0	0	0	0	0	0	0	0	0	0
DVALSSGSACTSASLEPSYVLR	DVALSSGSACTS[384.2525]ASLEPSYVLR	K	A	374	395	22	3	12S(384.2525)	sp|Q9Z1J3|NFS1_MOUSE	Q9Z1J3	NFS1_MOUSE	Nfs1	Cysteine desulfurase			0	0	0	0	1	1	0	0	0	0	0	0	0	0	1749.6	0	9389.97	11096.1	0	0	0	0	0	0	0	0	1749.6	0	9389.97	11096.1	0	0	0	0
DVALSSGSACTSASLEPSYVLR	DVALSSGSAC[384.2525]TSASLEPSYVLR	K	A	374	395	22	3	10C(384.2525)	sp|Q9Z1J3|NFS1_MOUSE	Q9Z1J3	NFS1_MOUSE	Nfs1	Cysteine desulfurase			0	0	0	0	1	2	0	0	0	0	0	0	0	0	0	0	9749.49	11702.1	0	0	0	0	0	0	0	0	0	0	9749.49	11702.1	0	0	0	0
DVALSSGSACTSASLEPSYVLR	DVALSSGSA[384.2525]CTSASLEPSYVLR	K	A	374	395	22	3	9A(384.2525)	sp|Q9Z1J3|NFS1_MOUSE	Q9Z1J3	NFS1_MOUSE	Nfs1	Cysteine desulfurase			0	0	0	0	0	1	0	0	0	0	0	0	0	0	0	0	0	11905.8	0	0	0	0	0	0	0	0	0	0	0	0	0	0	0	0
DVALSSGSACTSASLEPSYVLR	DVALSS[384.2525]GSACTSASLEPSYVLR	K	A	374	395	22	3	6S(384.2525)	sp|Q9Z1J3|NFS1_MOUSE	Q9Z1J3	NFS1_MOUSE	Nfs1	Cysteine desulfurase			0	0	0	0	1	0	0	0	0	0	0	0	0	0	0	0	10214.6	0	0	0	0	0	0	0	0	0	0	0	0	0	0	0	0	0
DYSEMYVTCAR	DYSEMYVTC[384.2525]AR	K	D	254	264	11	3	9C(384.2525)	sp|Q64374|RGN_MOUSE	Q64374	RGN_MOUSE	Rgn	Regucalcin			0	0	0	0	0	1	0	0	0	0	0	0	0	0	0	0	0	5184.85	0	0	0	0	0	0	0	0	0	0	0	0	0	0	0	0
EGVVECSFVQSK	EGVVEC[384.2525]SFVQSK	K	E	270	281	12	3	6C(384.2525)	sp|P08249|MDHM_MOUSE	P08249	MDHM_MOUSE	Mdh2	Malate dehydrogenase, mitochondrial			0	0	0	0	0	2	0	0	0	0	0	0	0	0	0	0	0	4972.84	0	0	0	0	0	0	0	0	0	0	0	0	0	0	0	0
GEVITTYCPANNEPIAR	GEVITTYC[384.2525]PANNEPIAR	R	V	63	79	17	3	8C(384.2525)	sp|Q9DBF1|AL7A1_MOUSE	Q9DBF1	AL7A1_MOUSE	Aldh7a1	Alpha-aminoadipic semialdehyde dehydrogenase			0	0	0	0	0	3	0	0	0	0	0	0	0	0	0	0	0	3765.07	0	0	0	0	0	0	0	0	0	0	0	0	0	0	0	0
GTFASLSELHCDK	GTFASLSELHCD[384.2525]K	K	L	84	96	13	3	12D(384.2525)	sp|P02088|HBB1_MOUSE	P02088	HBB1_MOUSE	Hbb-b1	Hemoglobin subunit beta-1	Hbb-b2	sp|P02089|HBB2_MOUSE	0	0	0	0	0	1	0	0	0	0	0	0	0	0	0	0	0	8864.76	0	0	0	0	0	0	0	0	0	0	0	0	0	0	0	0
GTFASLSELHCDK	GTFASLSELHC[384.2525]DK	K	L	84	96	13	3	11C(384.2525)	sp|P02088|HBB1_MOUSE	P02088	HBB1_MOUSE	Hbb-b1	Hemoglobin subunit beta-1	Hbb-b2	sp|P02089|HBB2_MOUSE	0	0	0	0	5	16	0	0	0	0	0	0	0	0	3045.92	0	5258.51	11452.6	0	0	0	0	0	0	0	0	3045.92	0	5258.51	11452.6	0	0	0	0
GTFASLSELHCDK	GTFASLSELH[384.2525]CDK	K	L	84	96	13	3	10H(384.2525)	sp|P02088|HBB1_MOUSE	P02088	HBB1_MOUSE	Hbb-b1	Hemoglobin subunit beta-1	Hbb-b2	sp|P02089|HBB2_MOUSE	0	0	0	0	1	3	0	0	0	0	0	0	0	0	0	0	1750.81	7216.91	0	0	0	0	0	0	0	0	0	0	1750.81	7216.91	0	0	0	0
IADQCPSSLAIQENANALAR	IADQC[384.2525]PSSLAIQENANALAR	R	Y	154	173	20	3	5C(384.2525)	sp|Q91Y97|ALDOB_MOUSE	Q91Y97	ALDOB_MOUSE	Aldob	Fructose-bisphosphate aldolase B			0	2	5	5	4	3	0	0	0	0	0	0	0	11771	28911.1	10947.6	31136.3	34114.7	0	0	0	0	0	0	0	11771	28911.1	10947.6	31136.3	34114.7	0	0	0	0
IADQCPSSLAIQENANALAR	IADQ[384.2525]CPSSLAIQENANALAR	R	Y	154	173	20	3	4Q(384.2525)	sp|Q91Y97|ALDOB_MOUSE	Q91Y97	ALDOB_MOUSE	Aldob	Fructose-bisphosphate aldolase B			0	2	1	0	0	2	0	0	0	0	0	0	0	13052.8	15663.9	0	0	34702.8	0	0	0	0	0	0	0	13052.8	15663.9	0	0	34702.8	0	0	0	0
IAVAAQNCYK	IAVAAQNC[384.2525]YK	K	V	60	69	10	3	8C(384.2525)	sp|P17751|TPIS_MOUSE	P17751	TPIS_MOUSE	Tpi1	Triosephosphate isomerase			0	0	0	0	0	1	0	0	0	0	0	0	0	0	0	0	0	3679.35	0	0	0	0	0	0	0	0	0	0	0	0	0	0	0	0
IIYGGSVTGATCK	IIYGGSVTGATC[384.2525]K	R	E	207	219	13	3	12C(384.2525)	sp|P17751|TPIS_MOUSE	P17751	TPIS_MOUSE	Tpi1	Triosephosphate isomerase			0	0	0	0	0	1	0	0	0	0	0	0	0	0	0	0	0	6624.13	0	0	0	0	0	0	0	0	0	0	0	0	0	0	0	0
IIYGGSVTGATCK	IIYGGSVTGAT[384.2525]CK	R	E	207	219	13	3	11T(384.2525)	sp|P17751|TPIS_MOUSE	P17751	TPIS_MOUSE	Tpi1	Triosephosphate isomerase			0	0	0	0	1	6	0	0	0	0	0	0	0	0	0	0	4875.66	6681.32	0	0	0	0	0	0	0	0	0	0	4875.66	6681.32	0	0	0	0
IVSNASCTTNCLAPLAK	IVSNASCTTN[384.2525]C[125.0477]LAPLAK	K	V	144	160	17	3	10N(384.2525),11C(125.0477)	sp|P16858|G3P_MOUSE	P16858	G3P_MOUSE	Gapdh	Glyceraldehyde-3-phosphate dehydrogenase			0	0	1	0	0	0	0	0	0	0	0	0	0	0	9837.23	0	11685.5	0	0	0	0	0	0	0	0	0	9837.23	0	11685.5	0	0	0	0	0
IVSNASCTTNCLAPLAK	IVSNASC[125.0477]TTNC[384.2525]LAPLAK	K	V	144	160	17	3	11C(384.2525),7C(125.0477)	sp|P16858|G3P_MOUSE	P16858	G3P_MOUSE	Gapdh	Glyceraldehyde-3-phosphate dehydrogenase			0	0	1	0	0	1	0	0	0	0	0	0	0	0	12187.9	0	0	16083.4	0	0	0	0	0	0	0	0	12187.9	0	0	16083.4	0	0	0	0
IVSNASCTTNCLAPLAK	IVSNASC[125.0477]TTN[384.2525]CLAPLAK	K	V	144	160	17	3	10N(384.2525),7C(125.0477)	sp|P16858|G3P_MOUSE	P16858	G3P_MOUSE	Gapdh	Glyceraldehyde-3-phosphate dehydrogenase			0	0	0	1	0	0	0	0	0	0	0	0	0	0	0	3909.3	0	0	0	0	0	0	0	0	0	0	0	0	0	0	0	0	0	0
IVSNASCTTNCLAPLAK	IVSNASC[125.0477]TT[384.2525]NCLAPLAK	K	V	144	160	17	3	7C(125.0477),9T(384.2525)	sp|P16858|G3P_MOUSE	P16858	G3P_MOUSE	Gapdh	Glyceraldehyde-3-phosphate dehydrogenase			0	1	0	0	0	1	0	0	0	0	0	0	0	2613.41	5140.46	0	13747	18655.2	0	0	0	0	0	0	0	2613.41	5140.46	0	13747	18655.2	0	0	0	0
IVSNASCTTNCLAPLAK	IVSNASC[125.0477]T[384.2525]TNCLAPLAK	K	V	144	160	17	3	7C(125.0477),8T(384.2525)	sp|P16858|G3P_MOUSE	P16858	G3P_MOUSE	Gapdh	Glyceraldehyde-3-phosphate dehydrogenase			0	0	0	0	0	1	0	0	0	0	0	0	0	0	0	0	0	19093	0	0	0	0	0	0	0	0	0	0	0	0	0	0	0	0
IVSNASCTTNCLAPLAK	IVSNASC[384.2525]TTNC[125.0477]LAPLAK	K	V	144	160	17	3	11C(125.0477),7C(384.2525)	sp|P16858|G3P_MOUSE	P16858	G3P_MOUSE	Gapdh	Glyceraldehyde-3-phosphate dehydrogenase			0	1	2	0	5	4	0	0	0	0	0	0	0	13199.2	13726.6	0	14491.6	22067.8	0	0	0	0	0	0	0	13199.2	13726.6	0	14491.6	22067.8	0	0	0	0
IVSNASCTTNCLAPLAK	IVSNAS[384.2525]CTTNC[125.0477]LAPLAK	K	V	144	160	17	3	11C(125.0477),6S(384.2525)	sp|P16858|G3P_MOUSE	P16858	G3P_MOUSE	Gapdh	Glyceraldehyde-3-phosphate dehydrogenase			0	1	2	1	4	0	0	0	0	0	0	0	0	12417.3	13080.6	223.167	13836.6	0	0	0	0	0	0	0	0	12417.3	13080.6	223.167	13836.6	0	0	0	0	0
IVSNASCTTNCLAPLAK	IVSNAS[384.2525]C[125.0477]TTNCLAPLAK	K	V	144	160	17	2,3	6S(384.2525),7C(125.0477)	sp|P16858|G3P_MOUSE	P16858	G3P_MOUSE	Gapdh	Glyceraldehyde-3-phosphate dehydrogenase			0	0	0	0	0	2	0	0	0	0	0	0	0	0	0	0	0	16755.1	0	0	0	0	0	0	0	0	0	0	0	0	0	0	0	0
IVSNASCTTNCLAPLAK	IVSN[384.2525]ASCTTNC[125.0477]LAPLAK	K	V	144	160	17	3	11C(125.0477),4N(384.2525)	sp|P16858|G3P_MOUSE	P16858	G3P_MOUSE	Gapdh	Glyceraldehyde-3-phosphate dehydrogenase			0	0	1	0	0	0	0	0	0	0	0	0	0	0	13522.9	0	0	0	0	0	0	0	0	0	0	0	0	0	0	0	0	0	0	0
IVSNASCTTNCLAPLAK	IVS[384.2525]NASCTTNC[125.0477]LAPLAK	K	V	144	160	17	3	11C(125.0477),3S(384.2525)	sp|P16858|G3P_MOUSE	P16858	G3P_MOUSE	Gapdh	Glyceraldehyde-3-phosphate dehydrogenase			0	0	2	0	0	0	0	0	0	0	0	0	0	0	14786	0	0	0	0	0	0	0	0	0	0	0	0	0	0	0	0	0	0	0
IADQCPSSLAIQENANALAR	I[384.2525]ADQCPSSLAIQENANALAR	R	Y	154	173	20	3	1I(384.2525)	sp|Q91Y97|ALDOB_MOUSE	Q91Y97	ALDOB_MOUSE	Aldob	Fructose-bisphosphate aldolase B			0	2	0	3	1	3	0	0	0	0	0	0	0	12649.8	0	11361.6	31048	34995.1	0	0	0	0	0	0	0	12649.8	0	11361.6	31048	34995.1	0	0	0	0
LECGGGR	LEC[384.2525]GGGR	K	W	368	374	7	2	3C(384.2525)	sp|P24549|AL1A1_MOUSE	P24549	AL1A1_MOUSE	Aldh1a1	Aldehyde dehydrogenase 1A1	Aldh1a7	sp|O35945|AL1A7_MOUSE	0	0	0	0	0	2	0	0	0	0	0	0	0	0	0	0	0	9241.89	0	0	0	0	0	0	0	0	0	0	0	0	0	0	0	0
LQVEGGGCSGFQYK	LQVEGGGC[384.2525]SGFQYK	R	F	72	85	14	3	8C(384.2525)	sp|Q9DCB8|ISCA2_MOUSE	Q9DCB8	ISCA2_MOUSE	Isca2	Iron-sulfur cluster assembly 2 homolog, mitochondrial			0	0	0	0	1	0	0	0	0	0	0	0	0	0	996.36	0	9154.65	0	0	0	0	0	0	0	0	0	996.36	0	9154.65	0	0	0	0	0
LQVEGGGCSGFQYK	LQVEGGG[384.2525]CSGFQYK	R	F	72	85	14	3	7G(384.2525)	sp|Q9DCB8|ISCA2_MOUSE	Q9DCB8	ISCA2_MOUSE	Isca2	Iron-sulfur cluster assembly 2 homolog, mitochondrial			0	0	0	0	1	0	0	0	0	0	0	0	0	0	0	0	9507.73	0	0	0	0	0	0	0	0	0	0	0	0	0	0	0	0	0
LQVEGGGCSGFQYK	LQVEGG[384.2525]GCSGFQYK	R	F	72	85	14	3	6G(384.2525)	sp|Q9DCB8|ISCA2_MOUSE	Q9DCB8	ISCA2_MOUSE	Isca2	Iron-sulfur cluster assembly 2 homolog, mitochondrial			0	0	0	0	1	3	0	0	0	0	0	0	0	0	0	0	7268.28	6803.17	0	0	0	0	0	0	0	0	0	0	7268.28	6803.17	0	0	0	0
LQVEGGGCSGFQYK	LQVEG[384.2525]GGCSGFQYK	R	F	72	85	14	3	5G(384.2525)	sp|Q9DCB8|ISCA2_MOUSE	Q9DCB8	ISCA2_MOUSE	Isca2	Iron-sulfur cluster assembly 2 homolog, mitochondrial			0	0	0	0	1	1	0	0	0	0	0	0	0	0	0	0	6687.49	6743.9	0	0	0	0	0	0	0	0	0	0	6687.49	6743.9	0	0	0	0
LQVEGGGCSGFQYK	LQVE[384.2525]GGGCSGFQYK	R	F	72	85	14	3	4E(384.2525)	sp|Q9DCB8|ISCA2_MOUSE	Q9DCB8	ISCA2_MOUSE	Isca2	Iron-sulfur cluster assembly 2 homolog, mitochondrial			0	0	0	0	0	1	0	0	0	0	0	0	0	0	0	0	0	5662.89	0	0	0	0	0	0	0	0	0	0	0	0	0	0	0	0
MVATGVCR	MVATGVC[384.2525]R	K	S	41	48	8	2	7C(384.2525)	sp|P00329|ADH1_MOUSE	P00329	ADH1_MOUSE	Adh1	Alcohol dehydrogenase 1			0	0	0	0	0	1	0	0	0	0	0	0	0	0	0	0	0	3183.62	0	0	0	0	0	0	0	0	0	0	0	0	0	0	0	0
NEDLNAEEVYGR	NEDLNAEEVY[384.2525]GR	K	L	122	133	12	3	10Y(384.2525)	sp|Q8K0C4|CP51A_MOUSE	Q8K0C4	CP51A_MOUSE	Cyp51a1	Lanosterol 14-alpha demethylase			0	0	0	0	0	4	0	0	0	0	0	0	0	0	0	0	1681.43	5130.68	0	0	0	0	0	0	0	0	0	0	1681.43	5130.68	0	0	0	0
NEFTLGEECELETMTGEK	NEFTLG[384.2525]EECELETMTGEK	R	V	61	78	18	3	6G(384.2525)	sp|P12710|FABPL_MOUSE	P12710	FABPL_MOUSE	Fabp1	Fatty acid-binding protein, liver			0	0	0	0	0	1	0	0	0	0	0	0	0	0	0	0	0	1733.39	0	0	0	0	0	0	0	0	0	0	0	0	0	0	0	0
NYDYILSTGCAPPGK	NYDY[384.2525]ILSTGCAPPGK	R	N	177	191	15	3	4Y(384.2525)	sp|Q9QXF8|GNMT_MOUSE	Q9QXF8	GNMT_MOUSE	Gnmt	Glycine N-methyltransferase			0	0	0	0	0	1	0	0	0	0	0	0	0	0	0	0	1652.01	1116.21	0	0	0	0	0	0	0	0	0	0	1652.01	1116.21	0	0	0	0
QVADEGDALVAGGVSQTPSYLSCK	QVADEGDALVAGGVSQTPSYLSC[384.2525]K	R	S	109	132	24	3	23C(384.2525)	sp|O35490|BHMT1_MOUSE	O35490	BHMT1_MOUSE	Bhmt	Betaine--homocysteine S-methyltransferase 1			0	0	0	0	2	4	0	0	0	0	0	0	0	0	0	0	14645.8	19482.8	0	0	0	0	0	0	0	0	0	0	14645.8	19482.8	0	0	0	0
QVADEGDALVAGGVSQTPSYLSCK	QVADEGDALVAGGVSQTPSYLS[384.2525]CK	R	S	109	132	24	3	22S(384.2525)	sp|O35490|BHMT1_MOUSE	O35490	BHMT1_MOUSE	Bhmt	Betaine--homocysteine S-methyltransferase 1			0	0	0	0	3	3	0	0	0	0	0	0	0	0	0	0	15137	19782.4	0	0	0	0	0	0	0	0	0	0	15137	19782.4	0	0	0	0
QVIDCQLADVNNLGK	QVIDC[384.2525]QLADVNNLGK	R	Y	441	455	15	3	5C(384.2525)	sp|Q9CPY7|AMPL_MOUSE	Q9CPY7	AMPL_MOUSE	Lap3	Cytosol aminopeptidase			0	0	0	0	0	1	0	0	0	0	0	0	0	0	0	0	0	5895.77	0	0	0	0	0	0	0	0	0	0	0	0	0	0	0	0
QVIDCQLADVNNLGK	Q[384.2525]VIDCQLADVNNLGK	R	Y	441	455	15	3	1Q(384.2525)	sp|Q9CPY7|AMPL_MOUSE	Q9CPY7	AMPL_MOUSE	Lap3	Cytosol aminopeptidase			0	0	0	0	0	1	0	0	0	0	0	0	0	0	0	0	0	5781.61	0	0	0	0	0	0	0	0	0	0	0	0	0	0	0	0
TCVADESAANCDK	TC[125.0477]VADESAANC[384.2525]DK	K	S	76	88	13	3	11C(384.2525),2C(125.0477)	sp|P07724|ALBU_MOUSE	P07724	ALBU_MOUSE	Alb	Albumin			0	0	2	1	2	1	0	0	0	0	0	0	0	0	10942.6	3187.38	12256.5	13497.7	0	0	0	0	0	0	0	0	10942.6	3187.38	12256.5	13497.7	0	0	0	0
TCVADESAANCDK	TC[125.0477]VADESAAN[384.2525]CDK	K	S	76	88	13	3	10N(384.2525),2C(125.0477)	sp|P07724|ALBU_MOUSE	P07724	ALBU_MOUSE	Alb	Albumin			0	1	0	1	0	1	0	0	0	0	0	0	0	3505.65	0	3753.4	578.174	12105.7	0	0	0	0	0	0	0	3505.65	0	3753.4	578.174	12105.7	0	0	0	0
TCVADESAANCDK	TC[125.0477]VADESAA[384.2525]NCDK	K	S	76	88	13	3	2C(125.0477),9A(384.2525)	sp|P07724|ALBU_MOUSE	P07724	ALBU_MOUSE	Alb	Albumin			0	0	2	3	0	0	0	0	0	0	0	0	0	0	11387.1	4005.69	10902.5	0	0	0	0	0	0	0	0	0	11387.1	4005.69	10902.5	0	0	0	0	0
TCVADESAANCDK	TC[384.2525]VADESAANC[125.0477]DK	K	S	76	88	13	3	11C(125.0477),2C(384.2525)	sp|P07724|ALBU_MOUSE	P07724	ALBU_MOUSE	Alb	Albumin			0	0	0	0	0	1	0	0	0	0	0	0	0	0	3100.65	0	0	10651.5	0	0	0	0	0	0	0	0	3100.65	0	0	10651.5	0	0	0	0
TNCDLYEK	TNC[384.2525]DLYEK	K	L	414	421	8	2	3C(384.2525)	sp|P07724|ALBU_MOUSE	P07724	ALBU_MOUSE	Alb	Albumin			0	0	0	0	1	0	0	0	0	0	0	0	0	0	10197	0	5743.98	0	0	0	0	0	0	0	0	0	10197	0	5743.98	0	0	0	0	0
TCVADESAANCDK	T[384.2525]CVADESAANC[125.0477]DK	K	S	76	88	13	3	11C(125.0477),1T(384.2525)	sp|P07724|ALBU_MOUSE	P07724	ALBU_MOUSE	Alb	Albumin			0	0	0	0	5	1	0	0	0	0	0	0	0	0	3772.78	0	9382.58	10456.8	0	0	0	0	0	0	0	0	3772.78	0	9382.58	10456.8	0	0	0	0
TNCDLYEK	T[384.2525]NCDLYEK	K	L	414	421	8	2	1T(384.2525)	sp|P07724|ALBU_MOUSE	P07724	ALBU_MOUSE	Alb	Albumin			0	0	0	0	1	1	0	0	0	0	0	0	0	0	13574.5	0	7372.34	11962.3	0	0	0	0	0	0	0	0	13574.5	0	7372.34	11962.3	0	0	0	0
TSACFEPSLDYMVTK	T[384.2525]SACFEPSLDYMVTK	K	I	758	772	15	3	1T(384.2525)	sp|Q8C196|CPSM_MOUSE	Q8C196	CPSM_MOUSE	Cps1	Carbamoyl-phosphate synthase [ammonia], mitochondrial			0	0	0	0	0	1	0	0	0	0	0	0	0	0	0	0	0	5003.49	0	0	0	0	0	0	0	0	0	0	0	0	0	0	0	0
VFANPEDCAGFGK	VFANPEDC[384.2525]AGFGK	K	G	43	55	13	2,3	8C(384.2525)	sp|Q91VS7|MGST1_MOUSE	Q91VS7	MGST1_MOUSE	Mgst1	Microsomal glutathione S-transferase 1			0	1	1	1	3	2	0	0	0	0	0	0	0	3496.53	23688.5	9309.89	35402.7	14746.7	0	0	0	0	0	0	0	3310.1	13582.3	8813.51	20235.5	21641.1	0	0	0	0
VFANPEDCAGFGK	VFANPED[384.2525]CAGFGK	K	G	43	55	13	3	7D(384.2525)	sp|Q91VS7|MGST1_MOUSE	Q91VS7	MGST1_MOUSE	Mgst1	Microsomal glutathione S-transferase 1			0	1	0	1	1	2	0	0	0	0	0	0	0	11345.3	0	8784.4	23377.6	40248.6	0	0	0	0	0	0	0	11345.3	0	8784.4	23377.6	40248.6	0	0	0	0
VFANPEDCAGFGK	VFANP[384.2525]EDCAGFGK	K	G	43	55	13	3	5P(384.2525)	sp|Q91VS7|MGST1_MOUSE	Q91VS7	MGST1_MOUSE	Mgst1	Microsomal glutathione S-transferase 1			0	0	1	0	0	0	0	0	0	0	0	0	0	0	14872.2	0	0	0	0	0	0	0	0	0	0	0	0	0	0	0	0	0	0	0
VIGSGCNLDSAR	VIGSGC[384.2525]NLDSAR	R	F	159	170	12	3	6C(384.2525)	sp|P16125|LDHB_MOUSE	P16125	LDHB_MOUSE	Ldhb	L-lactate dehydrogenase B chain	Ldha, Ldhc	sp|P00342|LDHC_MOUSE, sp|P06151|LDHA_MOUSE	0	0	0	0	0	2	0	0	0	0	0	0	0	0	4688.47	0	0	10065	0	0	0	0	0	0	0	0	4688.47	0	0	10065	0	0	0	0
VIGSGCNLDSAR	VIGSG[384.2525]CNLDSAR	R	F	159	170	12	3	5G(384.2525)	sp|P16125|LDHB_MOUSE	P16125	LDHB_MOUSE	Ldhb	L-lactate dehydrogenase B chain	Ldha, Ldhc	sp|P00342|LDHC_MOUSE, sp|P06151|LDHA_MOUSE	0	0	0	0	1	2	0	0	0	0	0	0	0	0	0	0	3782.7	10065	0	0	0	0	0	0	0	0	0	0	3782.7	10065	0	0	0	0
VIVVGNPANTNCLTASK	VIVVGNPANT[384.2525]NCLTASK	K	S	126	142	17	3	10T(384.2525)	sp|P14152|MDHC_MOUSE	P14152	MDHC_MOUSE	Mdh1	Malate dehydrogenase, cytoplasmic			0	0	0	0	0	1	0	0	0	0	0	0	0	0	0	0	10787	10743.8	0	0	0	0	0	0	0	0	0	0	10787	10743.8	0	0	0	0
VLLIENVASLUGTTIR	VLLIENVASLU[384.2525]GTTIR	K	D	37	52	16	3	11U(384.2525)	sp|P11352|GPX1_MOUSE	P11352	GPX1_MOUSE	Gpx1	Glutathione peroxidase 1			0	0	0	0	0	1	0	0	0	0	0	0	0	0	0	0	0	6449.11	0	0	0	0	0	0	0	0	0	0	0	0	0	0	0	0
VNEAACDIAR	VNEAAC[384.2525]DIAR	K	Q	99	108	10	2	6C(384.2525)	sp|O35490|BHMT1_MOUSE	O35490	BHMT1_MOUSE	Bhmt	Betaine--homocysteine S-methyltransferase 1			0	0	0	0	3	1	0	0	0	0	0	0	0	0	3830.74	0	12285.2	15952.4	0	0	0	0	0	0	0	0	3830.74	0	12285.2	15952.4	0	0	0	0
VNEAACDIAR	VNEAA[384.2525]CDIAR	K	Q	99	108	10	2	5A(384.2525)	sp|O35490|BHMT1_MOUSE	O35490	BHMT1_MOUSE	Bhmt	Betaine--homocysteine S-methyltransferase 1			0	0	0	0	0	1	0	0	0	0	0	0	0	0	0	0	0	15217	0	0	0	0	0	0	0	0	0	0	0	0	0	0	0	0
VNQIGSVTESLQACK	VNQIGSVTESLQAC[384.2525]K	K	L	344	358	15	3	14C(384.2525)	sp|P17182|ENOA_MOUSE	P17182	ENOA_MOUSE	Eno1	Alpha-enolase	Eno3	sp|P21550|ENOB_MOUSE	0	0	0	0	2	2	0	0	0	0	0	0	0	0	0	0	8835.49	11525.9	0	0	0	0	0	0	0	0	0	0	8835.49	11525.9	0	0	0	0
VNQIGSVTESLQACK	VNQIGSVTESLQA[384.2525]CK	K	L	344	358	15	3	13A(384.2525)	sp|P17182|ENOA_MOUSE	P17182	ENOA_MOUSE	Eno1	Alpha-enolase	Eno3	sp|P21550|ENOB_MOUSE	0	0	0	0	1	0	0	0	0	0	0	0	0	0	3808.08	0	8957.7	0	0	0	0	0	0	0	0	0	3808.08	0	8957.7	0	0	0	0	0
VNQIGSVTESLQACK	VNQIGSVTESLQ[384.2525]ACK	K	L	344	358	15	3	12Q(384.2525)	sp|P17182|ENOA_MOUSE	P17182	ENOA_MOUSE	Eno1	Alpha-enolase	Eno3	sp|P21550|ENOB_MOUSE	0	0	0	0	1	0	0	0	0	0	0	0	0	0	0	0	6597.38	0	0	0	0	0	0	0	0	0	0	0	0	0	0	0	0	0
VPTPNVSVVDLTCR	VPTPNVSVVDLTC[384.2525]R	R	L	233	246	14	3	13C(384.2525)	sp|P16858|G3P_MOUSE	P16858	G3P_MOUSE	Gapdh	Glyceraldehyde-3-phosphate dehydrogenase	Gapdhs	sp|Q64467|G3PT_MOUSE	0	0	1	0	3	0	0	0	0	0	0	0	0	0	11340.9	0	9500.62	0	0	0	0	0	0	0	0	0	11340.9	0	9500.62	0	0	0	0	0
VPTPNVSVVDLTCR	VPTPNVSVVDLT[384.2525]CR	R	L	233	246	14	3	12T(384.2525)	sp|P16858|G3P_MOUSE	P16858	G3P_MOUSE	Gapdh	Glyceraldehyde-3-phosphate dehydrogenase	Gapdhs	sp|Q64467|G3PT_MOUSE	0	0	1	0	2	2	0	0	0	0	0	0	0	0	8585.4	0	8966.99	13535.7	0	0	0	0	0	0	0	0	8585.4	0	8966.99	13535.7	0	0	0	0
VSLCGGGYCISK	VSLCGGG[384.2525]YC[125.0477]ISK	R	Y	168	179	12	3	7G(384.2525),9C(125.0477)	sp|O88451|RDH7_MOUSE	O88451	RDH7_MOUSE	Rdh7	Retinol dehydrogenase 7			1	0	0	0	0	0	0	0	0	0	0	0	6777.72	0	0	0	0	0	0	0	0	0	0	0	0	0	0	0	0	0	0	0	0	0
VSLCGGGYCISK	VSLCG[384.2525]GGYC[125.0477]ISK	R	Y	168	179	12	2,3	5G(384.2525),9C(125.0477)	sp|O88451|RDH7_MOUSE	O88451	RDH7_MOUSE	Rdh7	Retinol dehydrogenase 7			0	1	1	0	0	1	0	0	0	0	0	0	0	28098.8	62592.3	0	0	77689.5	0	0	0	0	0	0	0	28098.8	0	0	0	77689.5	0	0	0	0
VSLCGGGYCISK	VSLC[384.2525]GGGYC[125.0477]ISK	R	Y	168	179	12	3	4C(384.2525),9C(125.0477)	sp|O88451|RDH7_MOUSE	O88451	RDH7_MOUSE	Rdh7	Retinol dehydrogenase 7			2	5	0	3	7	6	0	0	0	0	0	0	6148.53	176309	158860	117537	389879	503537	0	0	0	0	0	0	6148.53	176309	158860	117537	389879	503537	0	0	0	0
VVAVDCGIK	VVAVDC[384.2525]GIK	K	N	220	228	9	2	6C(384.2525)	sp|Q8C196|CPSM_MOUSE	Q8C196	CPSM_MOUSE	Cps1	Carbamoyl-phosphate synthase [ammonia], mitochondrial			0	0	0	0	0	2	0	0	0	0	0	0	0	0	11544	0	13527.7	16160	0	0	0	0	0	0	0	0	11544	0	13527.7	16160	0	0	0	0
VSLCGGGYCISK	V[384.2525]SLCGGGYC[125.0477]ISK	R	Y	168	179	12	2	1V(384.2525),9C(125.0477)	sp|O88451|RDH7_MOUSE	O88451	RDH7_MOUSE	Rdh7	Retinol dehydrogenase 7			0	11	3	3	2	2	0	0	0	0	0	0	0	30298.3	21746.9	17072.4	44643.7	99910.9	0	0	0	0	0	0	0	30298.3	21746.9	17072.4	44643.7	99910.9	0	0	0	0
YMCENQATISSK	YMC[384.2525]ENQATISSK	K	L	287	298	12	3	3C(384.2525)	sp|P07724|ALBU_MOUSE	P07724	ALBU_MOUSE	Alb	Albumin			0	0	0	0	3	1	0	0	0	0	0	0	0	0	3665.68	0	8669.04	12752	0	0	0	0	0	0	0	0	3665.68	0	8669.04	12752	0	0	0	0
YVDLGGSYVGPTQNR	YVDLGGS[384.2525]YVGPTQNR	K	I	53	67	15	3	7S(384.2525)	sp|Q8BW75|AOFB_MOUSE	Q8BW75	AOFB_MOUSE	Maob	Amine oxidase [flavin-containing] B			0	0	0	1	0	0	0	0	0	0	0	0	0	0	0	19307.8	0	0	0	0	0	0	0	0	0	0	0	0	0	0	0	0	0	0
YVDLGGSYVGPTQNR	YVDLGG[384.2525]SYVGPTQNR	K	I	53	67	15	3	6G(384.2525)	sp|Q8BW75|AOFB_MOUSE	Q8BW75	AOFB_MOUSE	Maob	Amine oxidase [flavin-containing] B			0	0	0	0	0	1	0	0	0	0	0	0	0	0	0	0	0	598.344	0	0	0	0	0	0	0	0	0	0	0	0	0	0	0	0
YVDLGGSYVGPTQNR	YVDLG[384.2525]GSYVGPTQNR	K	I	53	67	15	3	5G(384.2525)	sp|Q8BW75|AOFB_MOUSE	Q8BW75	AOFB_MOUSE	Maob	Amine oxidase [flavin-containing] B			0	0	0	1	0	0	0	0	0	0	0	0	0	0	0	14653.2	0	0	0	0	0	0	0	0	0	0	0	0	0	0	0	0	0	0
YIQDIVAATLK	Y[384.2525]IQDIVAATLK	K	L	775	785	11	2,3	1Y(384.2525)	sp|O54754|AOXA_MOUSE	O54754	AOXA_MOUSE	Aox1	Aldehyde oxidase 1			0	0	0	0	1	4	0	0	0	0	0	0	0	0	0	0	5311.13	7079.32	0	0	0	0	0	0	0	0	0	0	2962.82	4002.99	0	0	0	0
YMCENQATISSK	Y[384.2525]MCENQATISSK	K	L	287	298	12	3	1Y(384.2525)	sp|P07724|ALBU_MOUSE	P07724	ALBU_MOUSE	Alb	Albumin			0	0	0	0	1	0	0	0	0	0	0	0	0	0	0	0	8886.21	0	0	0	0	0	0	0	0	0	0	0	0	0	0	0	0	0
[truncated: 26 more columns]

## Sheet: 3ga_modified_peptides
Peptide Sequence	Modified Sequence	Prev AA	Next AA	Start	End	Peptide Length	Charges	Assigned Modifications	Protein	Protein ID	Entry Name	Gene	Protein Description	Mapped Genes	Mapped Proteins	IBC_202406_acidicEl_DDA_6a1_GE7_1_4481 Spectral Count	IBC_202406_acidicEl_DDA_6a2_GC3_1_4458 Spectral Count	IBC_202406_acidicEl_DDA_6a3_GC7_1_4462 Spectral Count	IBC_202406_acidicEl_DDA_6a4_GD3_1_4466 Spectral Count	IBC_202406_acidicEl_DDA_6a5_GD7_1_4470 Spectral Count	IBC_202406_acidicEl_DDA_6a6_GE3_1_4477 Spectral Count	IBC_202406_acidicEl_DDA_no1_GE5_1_4479 Spectral Count	IBC_202406_acidicEl_DDA_no2_GC1_1_4456 Spectral Count	IBC_202406_acidicEl_DDA_no3_GC5_1_4460 Spectral Count	IBC_202406_acidicEl_DDA_no4_GD1_1_4464 Spectral Count	IBC_202406_acidicEl_DDA_no5_GD5_1_4468 Spectral Count	IBC_202406_acidicEl_DDA_no6_GE1_1_4475 Spectral Count	IBC_202406_acidicEl_DDA_6a1_GE7_1_4481 Intensity	IBC_202406_acidicEl_DDA_6a2_GC3_1_4458 Intensity	IBC_202406_acidicEl_DDA_6a3_GC7_1_4462 Intensity	IBC_202406_acidicEl_DDA_6a4_GD3_1_4466 Intensity	IBC_202406_acidicEl_DDA_6a5_GD7_1_4470 Intensity	IBC_202406_acidicEl_DDA_6a6_GE3_1_4477 Intensity	IBC_202406_acidicEl_DDA_no1_GE5_1_4479 Intensity	IBC_202406_acidicEl_DDA_no2_GC1_1_4456 Intensity	IBC_202406_acidicEl_DDA_no3_GC5_1_4460 Intensity	IBC_202406_acidicEl_DDA_no4_GD1_1_4464 Intensity	IBC_202406_acidicEl_DDA_no5_GD5_1_4468 Intensity	IBC_202406_acidicEl_DDA_no6_GE1_1_4475 Intensity	IBC_202406_acidicEl_DDA_6a1_GE7_1_4481 MaxLFQ Intensity	IBC_202406_acidicEl_DDA_6a2_GC3_1_4458 MaxLFQ Intensity	IBC_202406_acidicEl_DDA_6a3_GC7_1_4462 MaxLFQ Intensity	IBC_202406_acidicEl_DDA_6a4_GD3_1_4466 MaxLFQ Intensity	IBC_202406_acidicEl_DDA_6a5_GD7_1_4470 MaxLFQ Intensity	IBC_202406_acidicEl_DDA_6a6_GE3_1_4477 MaxLFQ Intensity	IBC_202406_acidicEl_DDA_no1_GE5_1_4479 MaxLFQ Intensity	IBC_202406_acidicEl_DDA_no2_GC1_1_4456 MaxLFQ Intensity	IBC_202406_acidicEl_DDA_no3_GC5_1_4460 MaxLFQ Intensity	IBC_202406_acidicEl_DDA_no4_GD1_1_4464 MaxLFQ Intensity
SSFANQGEICLCTSR	SSFANQGEIC[538.1943]LC[125.0477]TSR	R	I	278	292	15	3	10C(538.1943),12C(125.0477)	sp|Q8BH00|AL8A1_MOUSE	Q8BH00	AL8A1_MOUSE	Aldh8a1	2-aminomuconic semialdehyde dehydrogenase			0	0	3	0	3	0	0	0	0	0	0	0	0	0	7944.17	0	7105.06	0	0	0	0	0	0	0	0	0	7944.17	0	7105.06	0	0	0	0	0
SSFANQGEICLCTSR	SSFANQG[538.1943]EICLC[125.0477]TSR	R	I	278	292	15	3	12C(125.0477),7G(538.1943)	sp|Q8BH00|AL8A1_MOUSE	Q8BH00	AL8A1_MOUSE	Aldh8a1	2-aminomuconic semialdehyde dehydrogenase			0	0	1	0	0	0	0	0	0	0	0	0	0	0	7678.67	0	0	0	0	0	0	0	0	0	0	0	0	0	0	0	0	0	0	0
SFLVGSAAQSLSK	S[538.1943]FLVGSAAQSLSK	R	A	283	295	13	3	1S(538.1943)	sp|Q9R0H0|ACOX1_MOUSE	Q9R0H0	ACOX1_MOUSE	Acox1	Peroxisomal acyl-coenzyme A oxidase 1			0	0	3	0	0	0	0	0	0	0	0	0	0	0	1040.43	0	0	0	0	0	0	0	0	0	0	0	0	0	0	0	0	0	0	0
[truncated: 26 more columns]

## Sheet: 3ha_modified_peptides
Peptide Sequence	Modified Sequence	Prev AA	Next AA	Start	End	Peptide Length	Charges	Assigned Modifications	Protein	Protein ID	Entry Name	Gene	Protein Description	Mapped Genes	Mapped Proteins	IBC_202406_acidicEl_DDA_8a1_GE8_1_4482 Spectral Count	IBC_202406_acidicEl_DDA_8a2_GC4_1_4459 Spectral Count	IBC_202406_acidicEl_DDA_8a3_GC8_1_4463 Spectral Count	IBC_202406_acidicEl_DDA_8a4_GD4_1_4467 Spectral Count	IBC_202406_acidicEl_DDA_8a5_GD8_1_4471 Spectral Count	IBC_202406_acidicEl_DDA_8a6_GE4_1_4478 Spectral Count	IBC_202406_acidicEl_DDA_no1_GE5_1_4479 Spectral Count	IBC_202406_acidicEl_DDA_no2_GC1_1_4456 Spectral Count	IBC_202406_acidicEl_DDA_no3_GC5_1_4460 Spectral Count	IBC_202406_acidicEl_DDA_no4_GD1_1_4464 Spectral Count	IBC_202406_acidicEl_DDA_no5_GD5_1_4468 Spectral Count	IBC_202406_acidicEl_DDA_no6_GE1_1_4475 Spectral Count	IBC_202406_acidicEl_DDA_8a1_GE8_1_4482 Intensity	IBC_202406_acidicEl_DDA_8a2_GC4_1_4459 Intensity	IBC_202406_acidicEl_DDA_8a3_GC8_1_4463 Intensity	IBC_202406_acidicEl_DDA_8a4_GD4_1_4467 Intensity	IBC_202406_acidicEl_DDA_8a5_GD8_1_4471 Intensity	IBC_202406_acidicEl_DDA_8a6_GE4_1_4478 Intensity	IBC_202406_acidicEl_DDA_no1_GE5_1_4479 Intensity	IBC_202406_acidicEl_DDA_no2_GC1_1_4456 Intensity	IBC_202406_acidicEl_DDA_no3_GC5_1_4460 Intensity	IBC_202406_acidicEl_DDA_no4_GD1_1_4464 Intensity	IBC_202406_acidicEl_DDA_no5_GD5_1_4468 Intensity	IBC_202406_acidicEl_DDA_no6_GE1_1_4475 Intensity	IBC_202406_acidicEl_DDA_8a1_GE8_1_4482 MaxLFQ Intensity	IBC_202406_acidicEl_DDA_8a2_GC4_1_4459 MaxLFQ Intensity	IBC_202406_acidicEl_DDA_8a3_GC8_1_4463 MaxLFQ Intensity	IBC_202406_acidicEl_DDA_8a4_GD4_1_4467 MaxLFQ Intensity	IBC_202406_acidicEl_DDA_8a5_GD8_1_4471 MaxLFQ Intensity	IBC_202406_acidicEl_DDA_8a6_GE4_1_4478 MaxLFQ Intensity	IBC_202406_acidicEl_DDA_no1_GE5_1_4479 MaxLFQ Intensity	IBC_202406_acidicEl_DDA_no2_GC1_1_4456 MaxLFQ Intensity	IBC_202406_acidicEl_DDA_no3_GC5_1_4460 MaxLFQ Intensity	IBC_202406_acidicEl_DDA_no4_GD1_1_4464 MaxLFQ Intensity
AAGCDFNNVVK	AAG[494.2448]CDFNNVVK	K	T	68	78	11	3	3G(494.2448)	sp|P52760|RIDA_MOUSE	P52760	RIDA_MOUSE	Rida	2-iminobutanoate/2-iminopropanoate deaminase			0	1	0	0	0	0	0	0	0	0	0	0	0	5264.29	0	0	0	0	0	0	0	0	0	0	0	0	0	0	0	0	0	0	0	0
AGASIVGVNCHFDPSVSLQTVK	AGASIVGV[494.2448]NCHFDPSVSLQTVK	K	L	208	229	22	3	8V(494.2448)	sp|O35490|BHMT1_MOUSE	O35490	BHMT1_MOUSE	Bhmt	Betaine--homocysteine S-methyltransferase 1			0	1	0	0	0	0	0	0	0	0	0	0	0	15936.7	0	0	0	0	0	0	0	0	0	0	0	0	0	0	0	0	0	0	0	0
AGASIVGVNCHFDPSVSLQTVK	AGASIV[494.2448]GVNCHFDPSVSLQTVK	K	L	208	229	22	3,4	6V(494.2448)	sp|O35490|BHMT1_MOUSE	O35490	BHMT1_MOUSE	Bhmt	Betaine--homocysteine S-methyltransferase 1			0	2	0	0	0	0	0	0	0	0	0	0	0	25441.7	0	0	0	0	0	0	0	0	0	0	0	0	0	0	0	0	0	0	0	0
AQCPIVER	AQC[494.2448]PIVER	K	L	64	71	8	3	3C(494.2448)	sp|P97461|RS5_MOUSE	P97461	RS5_MOUSE	Rps5	Small ribosomal subunit protein uS7			0	2	1	0	0	0	0	0	0	0	0	0	0	20324.4	9871.88	0	0	0	0	0	0	0	0	0	0	20324.4	9871.88	0	0	0	0	0	0	0
AVQMGMSSVFFNKGENCIAAGR	AVQMGMSSV[494.2448]FFNKGENCIAAGR	K	L	691	712	22	3	9V(494.2448)	sp|Q8R0Y6|AL1L1_MOUSE	Q8R0Y6	AL1L1_MOUSE	Aldh1l1	Cytosolic 10-formyltetrahydrofolate dehydrogenase			0	1	0	0	0	0	0	0	0	0	0	0	0	16927.6	0	0	0	0	0	0	0	0	0	0	0	0	0	0	0	0	0	0	0	0
AQCPIVER	A[494.2448]QCPIVER	K	L	64	71	8	2,3	1A(494.2448)	sp|P97461|RS5_MOUSE	P97461	RS5_MOUSE	Rps5	Small ribosomal subunit protein uS7			0	3	0	0	0	0	0	0	0	0	0	0	0	35398	0	0	0	0	0	0	0	0	0	0	0	0	0	0	0	0	0	0	0	0
CLGLTEAQTR	C[494.2448]LGLTEAQTR	K	E	920	929	10	3	1C(494.2448)	sp|Q8C196|CPSM_MOUSE	Q8C196	CPSM_MOUSE	Cps1	Carbamoyl-phosphate synthase [ammonia], mitochondrial			0	1	0	0	0	0	0	0	0	0	0	0	0	3861.72	0	0	0	0	0	0	0	0	0	0	0	0	0	0	0	0	0	0	0	0
DFTPVCTTELGR	DFTPV[494.2448]CTTELGR	R	A	42	53	12	3	5V(494.2448)	sp|O08709|PRDX6_MOUSE	O08709	PRDX6_MOUSE	Prdx6	Peroxiredoxin-6			0	1	0	0	0	0	0	0	0	0	0	0	0	3516.87	0	0	0	0	0	0	0	0	0	0	0	0	0	0	0	0	0	0	0	0
GENCIAAGR	GENC[494.2448]IAAGR	K	L	704	712	9	2	4C(494.2448)	sp|Q8R0Y6|AL1L1_MOUSE	Q8R0Y6	AL1L1_MOUSE	Aldh1l1	Cytosolic 10-formyltetrahydrofolate dehydrogenase	Aldh1l2	sp|Q8K009|AL1L2_MOUSE	0	1	0	1	1	0	0	0	0	0	0	0	0	197027	0	44220.1	56123.2	0	0	0	0	0	0	0	0	197027	0	44220.1	56123.2	0	0	0	0	0
GEVITTYCPANNEPIAR	GEVITTYC[494.2448]PANNEPIAR	R	V	63	79	17	3	8C(494.2448)	sp|Q9DBF1|AL7A1_MOUSE	Q9DBF1	AL7A1_MOUSE	Aldh7a1	Alpha-aminoadipic semialdehyde dehydrogenase			0	6	0	0	0	0	0	0	0	0	0	0	0	15499.7	0	0	0	0	0	0	0	0	0	0	0	0	0	0	0	0	0	0	0	0
GEVITTYCPANNEPIAR	GEVITT[494.2448]YCPANNEPIAR	R	V	63	79	17	3	6T(494.2448)	sp|Q9DBF1|AL7A1_MOUSE	Q9DBF1	AL7A1_MOUSE	Aldh7a1	Alpha-aminoadipic semialdehyde dehydrogenase			0	1	0	0	0	0	0	0	0	0	0	0	0	14370.6	0	0	0	0	0	0	0	0	0	0	0	0	0	0	0	0	0	0	0	0
GSEVNVIGIGTSVVTCPK	GSEVNVIGIGTSVVTC[494.2448]PK	K	Q	370	387	18	3	16C(494.2448)	sp|Q8CC86|PNCB_MOUSE	Q8CC86	PNCB_MOUSE	Naprt	Nicotinate phosphoribosyltransferase			0	1	0	0	0	0	0	0	0	0	0	0	0	1514.5	0	0	0	0	0	0	0	0	0	0	0	0	0	0	0	0	0	0	0	0
GSEVNVIGIGTSVVTCPK	GSEVNVIGIGTSVVT[494.2448]CPK	K	Q	370	387	18	3	15T(494.2448)	sp|Q8CC86|PNCB_MOUSE	Q8CC86	PNCB_MOUSE	Naprt	Nicotinate phosphoribosyltransferase			0	1	0	0	0	0	0	0	0	0	0	0	0	1526.74	0	0	0	0	0	0	0	0	0	0	0	0	0	0	0	0	0	0	0	0
GTFASLSELHCDK	GTFASLSELHC[494.2448]DK	K	L	84	96	13	3	11C(494.2448)	sp|P02088|HBB1_MOUSE	P02088	HBB1_MOUSE	Hbb-b1	Hemoglobin subunit beta-1	Hbb-b2	sp|P02089|HBB2_MOUSE	0	3	0	0	0	0	0	0	0	0	0	0	0	39559.2	0	0	0	0	0	0	0	0	0	0	0	0	0	0	0	0	0	0	0	0
GYVSCALGCPYEGK	GYVSC[125.0477]ALG[494.2448]CPYEGK	R	V	166	179	14	3	5C(125.0477),8G(494.2448)	sp|P38060|HMGCL_MOUSE	P38060	HMGCL_MOUSE	Hmgcl	Hydroxymethylglutaryl-CoA lyase, mitochondrial			0	2	0	0	0	0	0	0	0	0	0	0	0	16249.4	0	0	0	0	0	0	0	0	0	0	0	0	0	0	0	0	0	0	0	0
GENCIAAGR	G[494.2448]ENCIAAGR	K	L	704	712	9	2	1G(494.2448)	sp|Q8R0Y6|AL1L1_MOUSE	Q8R0Y6	AL1L1_MOUSE	Aldh1l1	Cytosolic 10-formyltetrahydrofolate dehydrogenase	Aldh1l2	sp|Q8K009|AL1L2_MOUSE	0	0	0	0	0	1	0	0	0	0	0	0	0	0	0	0	0	16777.5	0	0	0	0	0	0	0	0	0	0	0	0	0	0	0	0
IADQCPSSLAIQENANALAR	IADQC[494.2448]PSSLAIQENANALAR	R	Y	154	173	20	3	5C(494.2448)	sp|Q91Y97|ALDOB_MOUSE	Q91Y97	ALDOB_MOUSE	Aldob	Fructose-bisphosphate aldolase B			0	10	6	0	0	0	0	0	0	0	0	0	0	64538.3	24516.3	0	0	0	0	0	0	0	0	0	0	64538.3	24516.3	0	0	0	0	0	0	0
IADQCPSSLAIQENANALAR	IADQ[494.2448]CPSSLAIQENANALAR	R	Y	154	173	20	3	4Q(494.2448)	sp|Q91Y97|ALDOB_MOUSE	Q91Y97	ALDOB_MOUSE	Aldob	Fructose-bisphosphate aldolase B			0	2	1	0	0	0	0	0	0	0	0	0	0	69043	3227.25	0	0	0	0	0	0	0	0	0	0	69043	3227.25	0	0	0	0	0	0	0
IVSNASCTTNCLAPLAK	IVSNASC[125.0477]TTNC[494.2448]LAPLAK	K	V	144	160	17	3	11C(494.2448),7C(125.0477)	sp|P16858|G3P_MOUSE	P16858	G3P_MOUSE	Gapdh	Glyceraldehyde-3-phosphate dehydrogenase			0	3	1	0	0	0	0	0	0	0	0	0	0	74166.8	49848	0	0	0	0	0	0	0	0	0	0	74166.8	49848	0	0	0	0	0	0	0
IVSNASCTTNCLAPLAK	IVSNASC[125.0477]TTN[494.2448]CLAPLAK	K	V	144	160	17	3	10N(494.2448),7C(125.0477)	sp|P16858|G3P_MOUSE	P16858	G3P_MOUSE	Gapdh	Glyceraldehyde-3-phosphate dehydrogenase			0	1	1	0	1	0	0	0	0	0	0	0	0	74166.8	53146.3	0	14825.2	0	0	0	0	0	0	0	0	74166.8	53146.3	0	14825.2	0	0	0	0	0
IVSNASCTTNCLAPLAK	IVSNASC[125.0477]TT[494.2448]NCLAPLAK	K	V	144	160	17	3	7C(125.0477),9T(494.2448)	sp|P16858|G3P_MOUSE	P16858	G3P_MOUSE	Gapdh	Glyceraldehyde-3-phosphate dehydrogenase			0	0	1	0	0	0	0	0	0	0	0	0	0	0	53146.3	0	0	0	0	0	0	0	0	0	0	0	0	0	0	0	0	0	0	0
IVSNASCTTNCLAPLAK	IVSNASC[125.0477]T[494.2448]TNCLAPLAK	K	V	144	160	17	3	7C(125.0477),8T(494.2448)	sp|P16858|G3P_MOUSE	P16858	G3P_MOUSE	Gapdh	Glyceraldehyde-3-phosphate dehydrogenase			0	0	1	1	1	0	0	0	0	0	0	0	0	0	55931.3	14014.3	14934.1	0	0	0	0	0	0	0	0	0	55931.3	14014.3	14934.1	0	0	0	0	0
IVSNASCTTNCLAPLAK	IVSNASC[494.2448]TTNC[125.0477]LAPLAK	K	V	144	160	17	3	11C(125.0477),7C(494.2448)	sp|P16858|G3P_MOUSE	P16858	G3P_MOUSE	Gapdh	Glyceraldehyde-3-phosphate dehydrogenase			0	9	3	1	1	0	0	0	0	0	0	0	0	73164.5	30916.5	9822.87	511.784	0	0	0	0	0	0	0	0	73164.5	30916.5	9822.87	511.784	0	0	0	0	0
IVSNASCTTNCLAPLAK	IVSNAS[494.2448]CTTNC[125.0477]LAPLAK	K	V	144	160	17	2,3	11C(125.0477),6S(494.2448)	sp|P16858|G3P_MOUSE	P16858	G3P_MOUSE	Gapdh	Glyceraldehyde-3-phosphate dehydrogenase			0	1	4	0	2	0	0	0	0	0	0	0	0	2198.36	29878.6	0	856.639	0	0	0	0	0	0	0	0	0	29878.6	0	856.639	0	0	0	0	0
IVSNASCTTNCLAPLAK	IVSNAS[494.2448]C[125.0477]TTNCLAPLAK	K	V	144	160	17	3	6S(494.2448),7C(125.0477)	sp|P16858|G3P_MOUSE	P16858	G3P_MOUSE	Gapdh	Glyceraldehyde-3-phosphate dehydrogenase			0	0	0	1	1	0	0	0	0	0	0	0	0	0	0	14035.9	14852.3	0	0	0	0	0	0	0	0	0	0	14035.9	14852.3	0	0	0	0	0
IYQIYEGTAQIQR	IYQIY[494.2448]EGTAQIQR	K	L	396	408	13	3	5Y(494.2448)	sp|P45952|ACADM_MOUSE	P45952	ACADM_MOUSE	Acadm	Medium-chain specific acyl-CoA dehydrogenase, mitochondrial			0	1	0	0	0	0	0	0	0	0	0	0	0	2232.27	0	0	0	0	0	0	0	0	0	0	0	0	0	0	0	0	0	0	0	0
IADQCPSSLAIQENANALAR	I[494.2448]ADQCPSSLAIQENANALAR	R	Y	154	173	20	3	1I(494.2448)	sp|Q91Y97|ALDOB_MOUSE	Q91Y97	ALDOB_MOUSE	Aldob	Fructose-bisphosphate aldolase B			0	7	2	0	0	0	0	0	0	0	0	0	0	83310	12662.6	0	0	0	0	0	0	0	0	0	0	83310	12662.6	0	0	0	0	0	0	0
KPTQQEAYQVHVGTMR	KPTQQEAYQVH[494.2448]VGTMR	R	A	415	430	16	4	11H(494.2448)	sp|Q8BJ64|CHDH_MOUSE	Q8BJ64	CHDH_MOUSE	Chdh	Choline dehydrogenase, mitochondrial			0	7	0	0	1	4	0	0	0	0	0	0	0	40278.6	0	0	2258.27	30050.3	0	0	0	0	0	0	0	40278.6	0	0	2258.27	30050.3	0	0	0	0
KPTQQEAYQVHVGTMR	KPTQQEAYQV[494.2448]HVGTMR	R	A	415	430	16	4	10V(494.2448)	sp|Q8BJ64|CHDH_MOUSE	Q8BJ64	CHDH_MOUSE	Chdh	Choline dehydrogenase, mitochondrial			0	3	0	0	1	3	0	0	0	0	0	0	0	16440.9	0	0	4609.63	20914.7	0	0	0	0	0	0	0	16440.9	0	0	4609.63	20914.7	0	0	0	0
KPTQQEAYQVHVGTMR	KPTQQEAYQ[494.2448]VHVGTMR	R	A	415	430	16	4	9Q(494.2448)	sp|Q8BJ64|CHDH_MOUSE	Q8BJ64	CHDH_MOUSE	Chdh	Choline dehydrogenase, mitochondrial			0	2	0	0	0	3	0	0	0	0	0	0	0	28688.5	0	0	0	32473.5	0	0	0	0	0	0	0	28688.5	0	0	0	32473.5	0	0	0	0
KPTQQEAYQVHVGTMR	KPTQQEAY[494.2448]QVHVGTMR	R	A	415	430	16	4	8Y(494.2448)	sp|Q8BJ64|CHDH_MOUSE	Q8BJ64	CHDH_MOUSE	Chdh	Choline dehydrogenase, mitochondrial			0	0	0	0	0	1	0	0	0	0	0	0	0	0	0	0	0	14564.9	0	0	0	0	0	0	0	0	0	0	0	0	0	0	0	0
MREIVHLQAGQCGNQIGAK	M[15.9949]REIVHLQA[494.2448]GQCGNQIGAK	-	F	1	19	19	4	1M(15.9949),9A(494.2448)	sp|P68372|TBB4B_MOUSE	P68372	TBB4B_MOUSE	Tubb4b	Tubulin beta-4B chain	Tubb2a, Tubb2b, Tubb3, Tubb4a, Tubb5	sp|P99024|TBB5_MOUSE, sp|Q7TMM9|TBB2A_MOUSE, sp|Q9CWF2|TBB2B_MOUSE, sp|Q9D6F9|TBB4A_MOUSE, sp|Q9ERD7|TBB3_MOUSE	0	1	0	0	0	0	0	0	0	0	0	0	0	2152.34	0	0	0	0	0	0	0	0	0	0	0	0	0	0	0	0	0	0	0	0
MREIVHLQAGQCGNQIGAK	M[15.9949]REIVHL[494.2448]QAGQCGNQIGAK	-	F	1	19	19	4	1M(15.9949),7L(494.2448)	sp|P68372|TBB4B_MOUSE	P68372	TBB4B_MOUSE	Tubb4b	Tubulin beta-4B chain	Tubb2a, Tubb2b, Tubb3, Tubb4a, Tubb5	sp|P99024|TBB5_MOUSE, sp|Q7TMM9|TBB2A_MOUSE, sp|Q9CWF2|TBB2B_MOUSE, sp|Q9D6F9|TBB4A_MOUSE, sp|Q9ERD7|TBB3_MOUSE	0	1	0	0	0	0	0	0	0	0	0	0	0	1820.68	0	0	0	0	0	0	0	0	0	0	0	0	0	0	0	0	0	0	0	0
NETLGGTCLNVGCIPSK	NETLGGTC[494.2448]LNVGC[125.0477]IPSK	K	A	73	89	17	3	13C(125.0477),8C(494.2448)	sp|O08749|DLDH_MOUSE	O08749	DLDH_MOUSE	Dld	Dihydrolipoyl dehydrogenase, mitochondrial			0	0	0	0	0	1	0	0	0	0	0	0	0	0	0	0	0	4782.99	0	0	0	0	0	0	0	0	0	0	0	0	0	0	0	0
NETLGGTCLNVGCIPSK	NETLGGT[494.2448]CLNVGC[125.0477]IPSK	K	A	73	89	17	3	13C(125.0477),7T(494.2448)	sp|O08749|DLDH_MOUSE	O08749	DLDH_MOUSE	Dld	Dihydrolipoyl dehydrogenase, mitochondrial			0	0	0	0	0	1	0	0	0	0	0	0	0	0	0	0	0	4914.6	0	0	0	0	0	0	0	0	0	0	0	0	0	0	0	0
NQQEGVCPEGSIDNSPVK	NQQEGVC[494.2448]PEGSIDNSPVK	R	W	344	361	18	3	7C(494.2448)	sp|Q921I1|TRFE_MOUSE	Q921I1	TRFE_MOUSE	Tf	Serotransferrin			0	4	5	0	0	0	0	0	0	0	0	0	0	16896.1	13607.4	0	0	0	0	0	0	0	0	0	0	16896.1	13607.4	0	0	0	0	0	0	0
NQQEGVCPEGSIDNSPVK	NQQEGV[494.2448]CPEGSIDNSPVK	R	W	344	361	18	3	6V(494.2448)	sp|Q921I1|TRFE_MOUSE	Q921I1	TRFE_MOUSE	Tf	Serotransferrin			0	1	0	0	0	0	0	0	0	0	0	0	0	12461.3	0	0	0	0	0	0	0	0	0	0	0	0	0	0	0	0	0	0	0	0
QVADEGDALVAGGVSQTPSYLSCK	QVADEGDALVAGGVSQTPSYLSC[494.2448]K	R	S	109	132	24	3	23C(494.2448)	sp|O35490|BHMT1_MOUSE	O35490	BHMT1_MOUSE	Bhmt	Betaine--homocysteine S-methyltransferase 1			0	1	0	0	0	0	0	0	0	0	0	0	0	17607.5	0	0	0	0	0	0	0	0	0	0	0	0	0	0	0	0	0	0	0	0
QVADEGDALVAGGVSQTPSYLSCK	QVADEGDALVAGGVSQTPSYLS[494.2448]CK	R	S	109	132	24	3	22S(494.2448)	sp|O35490|BHMT1_MOUSE	O35490	BHMT1_MOUSE	Bhmt	Betaine--homocysteine S-methyltransferase 1			0	1	0	0	0	0	0	0	0	0	0	0	0	18275	0	0	0	0	0	0	0	0	0	0	0	0	0	0	0	0	0	0	0	0
QVADEGDALVAGGVSQTPSYLSCK	QVADEGDALVAGGVSQTP[494.2448]SYLSCK	R	S	109	132	24	3	18P(494.2448)	sp|O35490|BHMT1_MOUSE	O35490	BHMT1_MOUSE	Bhmt	Betaine--homocysteine S-methyltransferase 1			0	1	0	0	0	0	0	0	0	0	0	0	0	16573.5	0	0	0	0	0	0	0	0	0	0	0	0	0	0	0	0	0	0	0	0
SDGALVDCGTSAQK	SDGALVDC[494.2448]GTSAQK	K	L	228	241	14	3	8C(494.2448)	sp|Q64105|SPRE_MOUSE	Q64105	SPRE_MOUSE	Spr	Sepiapterin reductase			0	1	0	0	0	0	0	0	0	0	0	0	0	8787.61	0	0	0	0	0	0	0	0	0	0	0	0	0	0	0	0	0	0	0	0
SDGALVDCGTSAQK	SDGALVD[494.2448]CGTSAQK	K	L	228	241	14	3	7D(494.2448)	sp|Q64105|SPRE_MOUSE	Q64105	SPRE_MOUSE	Spr	Sepiapterin reductase			0	1	0	0	0	0	0	0	0	0	0	0	0	12976	0	0	0	0	0	0	0	0	0	0	0	0	0	0	0	0	0	0	0	0
TCVADESAANCDK	TC[125.0477]VADESAANC[494.2448]DK	K	S	76	88	13	2,3	11C(494.2448),2C(125.0477)	sp|P07724|ALBU_MOUSE	P07724	ALBU_MOUSE	Alb	Albumin			0	8	4	1	5	0	0	0	0	0	0	0	0	58362.6	61477.5	8389.29	10947	0	0	0	0	0	0	0	0	43060.1	61477.5	8389.29	10947	0	0	0	0	0
TCVADESAANCDK	TC[125.0477]VADESAAN[494.2448]CDK	K	S	76	88	13	3	10N(494.2448),2C(125.0477)	sp|P07724|ALBU_MOUSE	P07724	ALBU_MOUSE	Alb	Albumin			0	0	2	0	1	0	0	0	0	0	0	0	0	0	50737.6	0	10996.3	0	0	0	0	0	0	0	0	0	50737.6	0	10996.3	0	0	0	0	0
TCVADESAANCDK	TC[125.0477]VADESAA[494.2448]NCDK	K	S	76	88	13	3	2C(125.0477),9A(494.2448)	sp|P07724|ALBU_MOUSE	P07724	ALBU_MOUSE	Alb	Albumin			0	1	0	0	0	0	0	0	0	0	0	0	0	50279.9	0	0	0	0	0	0	0	0	0	0	0	0	0	0	0	0	0	0	0	0
TCVADESAANCDK	TC[125.0477]VADESA[494.2448]ANCDK	K	S	76	88	13	2,3	2C(125.0477),8A(494.2448)	sp|P07724|ALBU_MOUSE	P07724	ALBU_MOUSE	Alb	Albumin			0	1	0	1	0	0	0	0	0	0	0	0	0	18126.9	0	7218.02	0	0	0	0	0	0	0	0	0	0	0	0	0	0	0	0	0	0
TGSQGQCTQVR	TGSQGQC[494.2448]TQVR	R	V	21	31	11	3	7C(494.2448)	sp|P62858|RS28_MOUSE	P62858	RS28_MOUSE	Rps28	Small ribosomal subunit protein eS28			0	4	0	0	0	0	0	0	0	0	0	0	0	16482.4	0	0	0	0	0	0	0	0	0	0	0	0	0	0	0	0	0	0	0	0
TGSQGQCTQVR	TGSQGQ[494.2448]CTQVR	R	V	21	31	11	3	6Q(494.2448)	sp|P62858|RS28_MOUSE	P62858	RS28_MOUSE	Rps28	Small ribosomal subunit protein eS28			0	1	0	0	0	0	0	0	0	0	0	0	0	15189.3	0	0	0	0	0	0	0	0	0	0	0	0	0	0	0	0	0	0	0	0
TCVADESAANCDK	T[494.2448]CVADESAANC[125.0477]DK	K	S	76	88	13	3	11C(125.0477),1T(494.2448)	sp|P07724|ALBU_MOUSE	P07724	ALBU_MOUSE	Alb	Albumin			0	2	1	0	0	0	0	0	0	0	0	0	0	24914.2	29540.1	0	0	0	0	0	0	0	0	0	0	24914.2	29540.1	0	0	0	0	0	0	0
VFANPEDCAGFGK	VFANPEDC[494.2448]AGFGK	K	G	43	55	13	2,3	8C(494.2448)	sp|Q91VS7|MGST1_MOUSE	Q91VS7	MGST1_MOUSE	Mgst1	Microsomal glutathione S-transferase 1			0	4	2	0	3	0	0	0	0	0	0	0	0	36943.9	28459.9	0	12827.9	0	0	0	0	0	0	0	0	36943.9	28459.9	0	0	0	0	0	0	0
VFANPEDCAGFGK	VFANPED[494.2448]CAGFGK	K	G	43	55	13	2,3	7D(494.2448)	sp|Q91VS7|MGST1_MOUSE	Q91VS7	MGST1_MOUSE	Mgst1	Microsomal glutathione S-transferase 1			0	1	1	1	0	1	0	0	0	0	0	0	0	30006.1	15062.1	11376.1	0	11617.8	0	0	0	0	0	0	0	30006.1	15062.1	11376.1	0	11617.8	0	0	0	0
VFANPEDCAGFGK	VFANP[494.2448]EDCAGFGK	K	G	43	55	13	3	5P(494.2448)	sp|Q91VS7|MGST1_MOUSE	Q91VS7	MGST1_MOUSE	Mgst1	Microsomal glutathione S-transferase 1			0	1	1	0	1	1	0	0	0	0	0	0	0	15739.4	26540	0	16155.7	8316.66	0	0	0	0	0	0	0	15739.4	26540	0	16155.7	8316.66	0	0	0	0
VIVVGNPANTNCLTASK	VIVVGNPANTNC[494.2448]LTASK	K	S	126	142	17	3	12C(494.2448)	sp|P14152|MDHC_MOUSE	P14152	MDHC_MOUSE	Mdh1	Malate dehydrogenase, cytoplasmic			0	1	1	0	0	0	0	0	0	0	0	0	0	17593	4345.87	0	0	0	0	0	0	0	0	0	0	17593	4345.87	0	0	0	0	0	0	0
VIVVGNPANTNCLTASK	VIVVGNPAN[494.2448]TNCLTASK	K	S	126	142	17	3	9N(494.2448)	sp|P14152|MDHC_MOUSE	P14152	MDHC_MOUSE	Mdh1	Malate dehydrogenase, cytoplasmic			0	1	0	0	0	0	0	0	0	0	0	0	0	15668.9	0	0	0	0	0	0	0	0	0	0	0	0	0	0	0	0	0	0	0	0
VIVVGNPANTNCLTASK	VIVVGNPA[494.2448]NTNCLTASK	K	S	126	142	17	3	8A(494.2448)	sp|P14152|MDHC_MOUSE	P14152	MDHC_MOUSE	Mdh1	Malate dehydrogenase, cytoplasmic			0	0	1	0	0	0	0	0	0	0	0	0	0	0	9338.8	0	0	0	0	0	0	0	0	0	0	0	0	0	0	0	0	0	0	0
VIVVGNPANTNCLTASK	VIVVGNP[494.2448]ANTNCLTASK	K	S	126	142	17	3	7P(494.2448)	sp|P14152|MDHC_MOUSE	P14152	MDHC_MOUSE	Mdh1	Malate dehydrogenase, cytoplasmic			0	3	3	0	0	0	0	0	0	0	0	0	0	16775.8	10488.5	0	0	0	0	0	0	0	0	0	0	16775.8	10488.5	0	0	0	0	0	0	0
VNEAACDIAR	VNEAAC[494.2448]DIAR	K	Q	99	108	10	2,3	6C(494.2448)	sp|O35490|BHMT1_MOUSE	O35490	BHMT1_MOUSE	Bhmt	Betaine--homocysteine S-methyltransferase 1			0	5	4	0	1	0	0	0	0	0	0	0	0	39788.8	26557.6	3357.64	2469.77	0	0	0	0	0	0	0	0	23975.1	26557.6	3357.64	2469.77	0	0	0	0	0
VNEAACDIAR	VNEAA[494.2448]CDIAR	K	Q	99	108	10	3	5A(494.2448)	sp|O35490|BHMT1_MOUSE	O35490	BHMT1_MOUSE	Bhmt	Betaine--homocysteine S-methyltransferase 1			0	0	1	0	0	0	0	0	0	0	0	0	0	0	14185.2	0	0	0	0	0	0	0	0	0	0	0	0	0	0	0	0	0	0	0
VPTPNVSVVDLTCR	VPTPNVSVVDLTC[494.2448]R	R	L	233	246	14	3	13C(494.2448)	sp|P16858|G3P_MOUSE	P16858	G3P_MOUSE	Gapdh	Glyceraldehyde-3-phosphate dehydrogenase	Gapdhs	sp|Q64467|G3PT_MOUSE	0	1	0	0	0	0	0	0	0	0	0	0	0	18417.7	0	0	0	0	0	0	0	0	0	0	0	0	0	0	0	0	0	0	0	0
VSLCGGGYCISK	VSLC[494.2448]GGGYC[125.0477]ISK	R	Y	168	179	12	3	4C(494.2448),9C(125.0477)	sp|O88451|RDH7_MOUSE	O88451	RDH7_MOUSE	Rdh7	Retinol dehydrogenase 7			0	1	0	0	0	0	0	0	0	0	0	0	0	15815.8	0	0	0	0	0	0	0	0	0	0	0	0	0	0	0	0	0	0	0	0
VSLCGGGYCISK	VSL[494.2448]CGGGYC[125.0477]ISK	R	Y	168	179	12	3	3L(494.2448),9C(125.0477)	sp|O88451|RDH7_MOUSE	O88451	RDH7_MOUSE	Rdh7	Retinol dehydrogenase 7			0	1	0	0	0	0	0	0	0	0	0	0	0	25394	0	0	0	0	0	0	0	0	0	0	0	0	0	0	0	0	0	0	0	0
VSSNGCK	VSSNGC[494.2448]K	R	A	243	249	7	2	6C(494.2448)	sp|Q91WL5|CP4CA_MOUSE	Q91WL5	CP4CA_MOUSE	Cyp4a12a	Cytochrome P450 4A12A			0	0	0	0	0	1	0	0	0	0	0	0	0	0	0	0	0	213128	0	0	0	0	0	0	0	0	0	0	0	0	0	0	0	0
VSLCGGGYCISK	VS[494.2448]LCGGGYC[125.0477]ISK	R	Y	168	179	12	3	2S(494.2448),9C(125.0477)	sp|O88451|RDH7_MOUSE	O88451	RDH7_MOUSE	Rdh7	Retinol dehydrogenase 7			0	1	0	0	0	0	0	0	0	0	0	0	0	21194.9	0	0	0	0	0	0	0	0	0	0	0	0	0	0	0	0	0	0	0	0
VSLCGGGYCISK	V[494.2448]SLCGGGYC[125.0477]ISK	R	Y	168	179	12	3	1V(494.2448),9C(125.0477)	sp|O88451|RDH7_MOUSE	O88451	RDH7_MOUSE	Rdh7	Retinol dehydrogenase 7			0	1	0	0	0	0	0	0	0	0	0	0	0	16102.5	0	0	0	0	0	0	0	0	0	0	0	0	0	0	0	0	0	0	0	0
YMCENQATISSK	YMC[494.2448]ENQATISSK	K	L	287	298	12	3	3C(494.2448)	sp|P07724|ALBU_MOUSE	P07724	ALBU_MOUSE	Alb	Albumin			0	5	2	0	0	0	0	0	0	0	0	0	0	17466.5	12572.6	0	0	0	0	0	0	0	0	0	0	17466.5	12572.6	0	0	0	0	0	0	0
YVDLGGSYVGPTQNR	YVDLGGSY[494.2448]VGPTQNR	K	I	53	67	15	3	8Y(494.2448)	sp|Q8BW75|AOFB_MOUSE	Q8BW75	AOFB_MOUSE	Maob	Amine oxidase [flavin-containing] B			0	0	0	0	0	1	0	0	0	0	0	0	0	0	0	0	0	5812.43	0	0	0	0	0	0	0	0	0	0	0	0	0	0	0	0
YMCENQATISSK	Y[494.2448]MCENQATISSK	K	L	287	298	12	3	1Y(494.2448)	sp|P07724|ALBU_MOUSE	P07724	ALBU_MOUSE	Alb	Albumin			0	3	2	0	0	0	0	0	0	0	0	0	0	17175.6	11863.9	0	0	0	0	0	0	0	0	0	0	17175.6	11863.9	0	0	0	0	0	0	0
[truncated: 26 more columns]

## Sheet: MSFraggerParameter
3aa-any								3ga-any								3ha-any
database_name = D:\Data\Laura\fastaDatabases\2024-06-10-decoys-SPmouse20240610-Cr.fasta.fas			# Path to the protein database file in FASTA format.					database_name = D:\Data\Laura\fastaDatabases\2024-06-10-decoys-SPmouse20240610-Cr.fasta.fas			# Path to the protein database file in FASTA format.					database_name = D:\Data\Laura\fastaDatabases\2024-06-10-decoys-SPmouse20240610-Cr.fasta.fas			# Path to the protein database file in FASTA format.
num_threads = 30			# Number of CPU threads to use.					num_threads = 30			# Number of CPU threads to use.					num_threads = 30			# Number of CPU threads to use.
precursor_mass_lower = -20			# Lower bound of the precursor mass window.					precursor_mass_lower = -20			# Lower bound of the precursor mass window.					precursor_mass_lower = -20			# Lower bound of the precursor mass window.
precursor_mass_upper = 20			# Upper bound of the precursor mass window.					precursor_mass_upper = 20			# Upper bound of the precursor mass window.					precursor_mass_upper = 20			# Upper bound of the precursor mass window.
precursor_mass_units = 1			# Precursor mass tolerance units (0 for Da, 1 for ppm).					precursor_mass_units = 1			# Precursor mass tolerance units (0 for Da, 1 for ppm).					precursor_mass_units = 1			# Precursor mass tolerance units (0 for Da, 1 for ppm).
data_type = 0			# Data type (0 for DDA, 1 for DIA, 2 for gas-phase fractionation DIA, 3 for DDA+).					data_type = 0			# Data type (0 for DDA, 1 for DIA, 2 for gas-phase fractionation DIA, 3 for DDA+).					data_type = 0			# Data type (0 for DDA, 1 for DIA, 2 for gas-phase fractionation DIA, 3 for DDA+).
precursor_true_tolerance = 20			# True precursor mass tolerance (window is +/- this value).					precursor_true_tolerance = 20			# True precursor mass tolerance (window is +/- this value).					precursor_true_tolerance = 20			# True precursor mass tolerance (window is +/- this value).
precursor_true_units = 1			# True precursor mass tolerance units (0 for Da, 1 for ppm).					precursor_true_units = 1			# True precursor mass tolerance units (0 for Da, 1 for ppm).					precursor_true_units = 1			# True precursor mass tolerance units (0 for Da, 1 for ppm).
fragment_mass_tolerance = 20			# Fragment mass tolerance (window is +/- this value).					fragment_mass_tolerance = 20			# Fragment mass tolerance (window is +/- this value).					fragment_mass_tolerance = 20			# Fragment mass tolerance (window is +/- this value).
fragment_mass_units = 1			# Fragment mass tolerance units (0 for Da, 1 for ppm).					fragment_mass_units = 1			# Fragment mass tolerance units (0 for Da, 1 for ppm).					fragment_mass_units = 1			# Fragment mass tolerance units (0 for Da, 1 for ppm).
calibrate_mass = 2			# Perform mass calibration (0 for OFF, 1 for ON, 2 for ON and find optimal parameters, 4 for ON and find the optimal fragment mass tolerance).					calibrate_mass = 2			# Perform mass calibration (0 for OFF, 1 for ON, 2 for ON and find optimal parameters, 4 for ON and find the optimal fragment mass tolerance).					calibrate_mass = 2			# Perform mass calibration (0 for OFF, 1 for ON, 2 for ON and find optimal parameters, 4 for ON and find the optimal fragment mass tolerance).
use_all_mods_in_first_search = 0			# Use all variable modifications in first search (0 for No, 1 for Yes).					use_all_mods_in_first_search = 0			# Use all variable modifications in first search (0 for No, 1 for Yes).					use_all_mods_in_first_search = 0			# Use all variable modifications in first search (0 for No, 1 for Yes).
decoy_prefix = rev_			# Prefix of the decoy protein entries. Used for parameter optimization only.					decoy_prefix = rev_			# Prefix of the decoy protein entries. Used for parameter optimization only.					decoy_prefix = rev_			# Prefix of the decoy protein entries. Used for parameter optimization only.
deisotope = 1			# Perform deisotoping or not (0=no, 1=yes and assume singleton peaks single charged, 2=yes and assume singleton peaks single or double charged).					deisotope = 1			# Perform deisotoping or not (0=no, 1=yes and assume singleton peaks single charged, 2=yes and assume singleton peaks single or double charged).					deisotope = 1			# Perform deisotoping or not (0=no, 1=yes and assume singleton peaks single charged, 2=yes and assume singleton peaks single or double charged).
deneutralloss = 1			# Perform deneutrallossing or not (0=no, 1=yes).					deneutralloss = 1			# Perform deneutrallossing or not (0=no, 1=yes).					deneutralloss = 1			# Perform deneutrallossing or not (0=no, 1=yes).
isotope_error = 0/1/2/3			# Also search for MS/MS events triggered on specified isotopic peaks.					isotope_error = 0/1/2/3			# Also search for MS/MS events triggered on specified isotopic peaks.					isotope_error = 0/1/2/3			# Also search for MS/MS events triggered on specified isotopic peaks.
mass_offsets = 0.0			# Creates multiple precursor tolerance windows with specified mass offsets.					mass_offsets = 0.0			# Creates multiple precursor tolerance windows with specified mass offsets.					mass_offsets = 0.0			# Creates multiple precursor tolerance windows with specified mass offsets.
mass_offsets_detailed =			# Optional detailed mass offset list. Overrides mass_offsets if use_detailed_offsets = 1.					mass_offsets_detailed =			# Optional detailed mass offset list. Overrides mass_offsets if use_detailed_offsets = 1.					mass_offsets_detailed =			# Optional detailed mass offset list. Overrides mass_offsets if use_detailed_offsets = 1.
use_detailed_offsets = 0			# Whether to use the regular (0) or detailed (1) mass offset list.					use_detailed_offsets = 0			# Whether to use the regular (0) or detailed (1) mass offset list.					use_detailed_offsets = 0			# Whether to use the regular (0) or detailed (1) mass offset list.
precursor_mass_mode = selected			# One of isolated/selected/corrected.					precursor_mass_mode = selected			# One of isolated/selected/corrected.					precursor_mass_mode = selected			# One of isolated/selected/corrected.
remove_precursor_peak = 0			# Remove precursor peaks from tandem mass spectra. 0 = not remove; 1 = remove the peak with precursor charge; 2 = remove the peaks with all charge states (only for DDA mode).					remove_precursor_peak = 0			# Remove precursor peaks from tandem mass spectra. 0 = not remove; 1 = remove the peak with precursor charge; 2 = remove the peaks with all charge states (only for DDA mode).					remove_precursor_peak = 0			# Remove precursor peaks from tandem mass spectra. 0 = not remove; 1 = remove the peak with precursor charge; 2 = remove the peaks with all charge states (only for DDA mode).
remove_precursor_range = -1.500000,1.500000			# m/z range in removing precursor peaks. Only for DDA mode. Unit: Th.					remove_precursor_range = -1.500000,1.500000			# m/z range in removing precursor peaks. Only for DDA mode. Unit: Th.					remove_precursor_range = -1.500000,1.500000			# m/z range in removing precursor peaks. Only for DDA mode. Unit: Th.
intensity_transform = 0			# Transform peaks intensities with sqrt root. 0 = not transform; 1 = transform using sqrt root.					intensity_transform = 0			# Transform peaks intensities with sqrt root. 0 = not transform; 1 = transform using sqrt root.					intensity_transform = 0			# Transform peaks intensities with sqrt root. 0 = not transform; 1 = transform using sqrt root.
activation_types = all			# Filter to only search scans of provided activation type(s). Allowed: All, HCD, CID, ETD, ECD.					activation_types = all			# Filter to only search scans of provided activation type(s). Allowed: All, HCD, CID, ETD, ECD.					activation_types = all			# Filter to only search scans of provided activation type(s). Allowed: All, HCD, CID, ETD, ECD.
analyzer_types = all			# Filter to only include scans matching the provided analyzer type(s) in search. Only support the mzML and raw format. Allowed types: all, FTMS, ITMS.					analyzer_types = all			# Filter to only include scans matching the provided analyzer type(s) in search. Only support the mzML and raw format. Allowed types: all, FTMS, ITMS.					analyzer_types = all			# Filter to only include scans matching the provided analyzer type(s) in search. Only support the mzML and raw format. Allowed types: all, FTMS, ITMS.
group_variable = 0			# Specify the variable used to decide the PSM group in the group FDR estimation. 0 = no group FDR; 1 = num_enzyme_termini; 2 = PE from protein header.					group_variable = 0			# Specify the variable used to decide the PSM group in the group FDR estimation. 0 = no group FDR; 1 = num_enzyme_termini; 2 = PE from protein header.					group_variable = 0			# Specify the variable used to decide the PSM group in the group FDR estimation. 0 = no group FDR; 1 = num_enzyme_termini; 2 = PE from protein header.
require_precursor = 1			# If required, PSMs with no precursor peaks will be discarded. For DIA data type only. 0 = no, 1 = yes.					require_precursor = 1			# If required, PSMs with no precursor peaks will be discarded. For DIA data type only. 0 = no, 1 = yes.					require_precursor = 1			# If required, PSMs with no precursor peaks will be discarded. For DIA data type only. 0 = no, 1 = yes.
reuse_dia_fragment_peaks = 0			# Allow the same peak matches to multiple peptides. For DIA data type only. 0 = no, 1 = yes.					reuse_dia_fragment_peaks = 0			# Allow the same peak matches to multiple peptides. For DIA data type only. 0 = no, 1 = yes.					reuse_dia_fragment_peaks = 0			# Allow the same peak matches to multiple peptides. For DIA data type only. 0 = no, 1 = yes.
write_calibrated_mzml = 0			# Write calibrated MS2 scan to a mzML file (0 for No, 1 for Yes).					write_calibrated_mzml = 0			# Write calibrated MS2 scan to a mzML file (0 for No, 1 for Yes).					write_calibrated_mzml = 0			# Write calibrated MS2 scan to a mzML file (0 for No, 1 for Yes).
write_uncalibrated_mgf = 1			# Write uncalibrated MS2 scan to a MGF file (0 for No, 1 for Yes). Only for .raw and .d formats.					write_uncalibrated_mgf = 1			# Write uncalibrated MS2 scan to a MGF file (0 for No, 1 for Yes). Only for .raw and .d formats.					write_uncalibrated_mgf = 1			# Write uncalibrated MS2 scan to a MGF file (0 for No, 1 for Yes). Only for .raw and .d formats.
write_mzbin_all = 0								write_mzbin_all = 0								write_mzbin_all = 0
mass_diff_to_variable_mod = 0			# Put mass diff as a variable modification. 0 for no; 1 for yes and remove delta mass; 2 for yes and keep delta mass.					mass_diff_to_variable_mod = 0			# Put mass diff as a variable modification. 0 for no; 1 for yes and remove delta mass; 2 for yes and keep delta mass.					mass_diff_to_variable_mod = 0			# Put mass diff as a variable modification. 0 for no; 1 for yes and remove delta mass; 2 for yes and keep delta mass.
localize_delta_mass = 0			# Include fragment ions mass-shifted by unknown modifications (recommended for open and mass offset searches) (0 for OFF, 1 for ON).					localize_delta_mass = 0			# Include fragment ions mass-shifted by unknown modifications (recommended for open and mass offset searches) (0 for OFF, 1 for ON).					localize_delta_mass = 0			# Include fragment ions mass-shifted by unknown modifications (recommended for open and mass offset searches) (0 for OFF, 1 for ON).
delta_mass_exclude_ranges = (-1.5,3.5)			# Exclude mass range for shifted ions searching.					delta_mass_exclude_ranges = (-1.5,3.5)			# Exclude mass range for shifted ions searching.					delta_mass_exclude_ranges = (-1.5,3.5)			# Exclude mass range for shifted ions searching.
fragment_ion_series = b,y			# Ion series used in search, specify any of a,b,c,x,y,z,Y,b-18,y-18 (comma separated).					fragment_ion_series = b,y			# Ion series used in search, specify any of a,b,c,x,y,z,Y,b-18,y-18 (comma separated).					fragment_ion_series = b,y			# Ion series used in search, specify any of a,b,c,x,y,z,Y,b-18,y-18 (comma separated).
ion_series_definitions =			# User defined ion series. Example: "b* N -17.026548;b0 N -18.010565".					ion_series_definitions =			# User defined ion series. Example: "b* N -17.026548;b0 N -18.010565".					ion_series_definitions =			# User defined ion series. Example: "b* N -17.026548;b0 N -18.010565".
labile_search_mode = off			# type of search (nglycan, labile, or off). Off means non-labile/typical search.					labile_search_mode = off			# type of search (nglycan, labile, or off). Off means non-labile/typical search.					labile_search_mode = off			# type of search (nglycan, labile, or off). Off means non-labile/typical search.
restrict_deltamass_to = all			# Specify amino acids on which delta masses (mass offsets or search modifications) can occur. Allowed values are single letter codes (e.g. ACD) and '-', must be capitalized. Use 'all' to allow any amino acid.					restrict_deltamass_to = all			# Specify amino acids on which delta masses (mass offsets or search modifications) can occur. Allowed values are single letter codes (e.g. ACD) and '-', must be capitalized. Use 'all' to allow any amino acid.					restrict_deltamass_to = all			# Specify amino acids on which delta masses (mass offsets or search modifications) can occur. Allowed values are single letter codes (e.g. ACD) and '-', must be capitalized. Use 'all' to allow any amino acid.
diagnostic_intensity_filter = 0			# [nglycan/labile search_mode only]. Minimum relative intensity for SUM of all detected oxonium ions to achieve for spectrum to contain diagnostic fragment evidence. Calculated relative to spectrum base peak. 0 <= value.					diagnostic_intensity_filter = 0			# [nglycan/labile search_mode only]. Minimum relative intensity for SUM of all detected oxonium ions to achieve for spectrum to contain diagnostic fragment evidence. Calculated relative to spectrum base peak. 0 <= value.					diagnostic_intensity_filter = 0			# [nglycan/labile search_mode only]. Minimum relative intensity for SUM of all detected oxonium ions to achieve for spectrum to contain diagnostic fragment evidence. Calculated relative to spectrum base peak. 0 <= value.
Y_type_masses =			# [nglycan/labile search_mode only]. Specify fragments of labile mods that are commonly retained on intact peptides (e.g. Y ions for glycans). Only used if 'Y' is included in fragment_ion_series.					Y_type_masses =			# [nglycan/labile search_mode only]. Specify fragments of labile mods that are commonly retained on intact peptides (e.g. Y ions for glycans). Only used if 'Y' is included in fragment_ion_series.					Y_type_masses =			# [nglycan/labile search_mode only]. Specify fragments of labile mods that are commonly retained on intact peptides (e.g. Y ions for glycans). Only used if 'Y' is included in fragment_ion_series.
diagnostic_fragments =			# [nglycan/labile search_mode only]. Specify diagnostic fragments of labile mods that appear in the low m/z region. Only used if diagnostic_intensity_filter > 0.					diagnostic_fragments =			# [nglycan/labile search_mode only]. Specify diagnostic fragments of labile mods that appear in the low m/z region. Only used if diagnostic_intensity_filter > 0.					diagnostic_fragments =			# [nglycan/labile search_mode only]. Specify diagnostic fragments of labile mods that appear in the low m/z region. Only used if diagnostic_intensity_filter > 0.
remainder_fragment_masses =			# [labile search_mode only] List of possible remainder fragment ions to consider. Remainder masses are partial modification masses left on b/y ions after fragmentation.					remainder_fragment_masses =			# [labile search_mode only] List of possible remainder fragment ions to consider. Remainder masses are partial modification masses left on b/y ions after fragmentation.					remainder_fragment_masses =			# [labile search_mode only] List of possible remainder fragment ions to consider. Remainder masses are partial modification masses left on b/y ions after fragmentation.
search_enzyme_name_1 = stricttrypsin			# Name of the first enzyme.					search_enzyme_name_1 = stricttrypsin			# Name of the first enzyme.					search_enzyme_name_1 = stricttrypsin			# Name of the first enzyme.
search_enzyme_cut_1 = KR			# First enzyme's cutting amino acid.					search_enzyme_cut_1 = KR			# First enzyme's cutting amino acid.					search_enzyme_cut_1 = KR			# First enzyme's cutting amino acid.
search_enzyme_nocut_1 =			# First enzyme's protecting amino acid.					search_enzyme_nocut_1 =			# First enzyme's protecting amino acid.					search_enzyme_nocut_1 =			# First enzyme's protecting amino acid.
search_enzyme_sense_1 = C			# First enzyme's cutting terminal.					search_enzyme_sense_1 = C			# First enzyme's cutting terminal.					search_enzyme_sense_1 = C			# First enzyme's cutting terminal.
allowed_missed_cleavage_1 = 2			# First enzyme's allowed number of missed cleavages per peptide. Maximum value is 5.					allowed_missed_cleavage_1 = 2			# First enzyme's allowed number of missed cleavages per peptide. Maximum value is 5.					allowed_missed_cleavage_1 = 2			# First enzyme's allowed number of missed cleavages per peptide. Maximum value is 5.
search_enzyme_name_2 = null			# Name of the second enzyme.					search_enzyme_name_2 = null			# Name of the second enzyme.					search_enzyme_name_2 = null			# Name of the second enzyme.
search_enzyme_cut_2 =			# Second enzyme's cutting amino acid.					search_enzyme_cut_2 =			# Second enzyme's cutting amino acid.					search_enzyme_cut_2 =			# Second enzyme's cutting amino acid.
search_enzyme_nocut_2 =			# Second enzyme's protecting amino acid.					search_enzyme_nocut_2 =			# Second enzyme's protecting amino acid.					search_enzyme_nocut_2 =			# Second enzyme's protecting amino acid.
search_enzyme_sense_2 = C			# Second enzyme's cutting terminal.					search_enzyme_sense_2 = C			# Second enzyme's cutting terminal.					search_enzyme_sense_2 = C			# Second enzyme's cutting terminal.
allowed_missed_cleavage_2 = 2			# Second enzyme's allowed number of missed cleavages per peptide. Maximum value is 5.					allowed_missed_cleavage_2 = 2			# Second enzyme's allowed number of missed cleavages per peptide. Maximum value is 5.					allowed_missed_cleavage_2 = 2			# Second enzyme's allowed number of missed cleavages per peptide. Maximum value is 5.
num_enzyme_termini = 2			# 0 for non-enzymatic, 1 for semi-enzymatic, and 2 for fully-enzymatic.					num_enzyme_termini = 2			# 0 for non-enzymatic, 1 for semi-enzymatic, and 2 for fully-enzymatic.					num_enzyme_termini = 2			# 0 for non-enzymatic, 1 for semi-enzymatic, and 2 for fully-enzymatic.
clip_nTerm_M = 1			# Specifies the trimming of a protein N-terminal methionine as a variable modification (0 or 1).					clip_nTerm_M = 1			# Specifies the trimming of a protein N-terminal methionine as a variable modification (0 or 1).					clip_nTerm_M = 1			# Specifies the trimming of a protein N-terminal methionine as a variable modification (0 or 1).
# maximum of 16 mods - amino acid codes, * for any amino acid, [ and ] specifies protein termini, n and c specifies peptide termini								# maximum of 16 mods - amino acid codes, * for any amino acid, [ and ] specifies protein termini, n and c specifies peptide termini								# maximum of 16 mods - amino acid codes, * for any amino acid, [ and ] specifies protein termini, n and c specifies peptide termini
variable_mod_01 = 15.9949 M 3								variable_mod_01 = 15.9949 M 3								variable_mod_01 = 15.9949 M 3
# variable_mod_02 = 42.0106 [^ 1								# variable_mod_02 = 42.0106 [^ 1								# variable_mod_02 = 42.0106 [^ 1
# variable_mod_03 = 79.96633 STY 3								# variable_mod_03 = 79.96633 STY 3								# variable_mod_03 = 79.96633 STY 3
# variable_mod_04 = -17.0265 nQnC 1								# variable_mod_04 = -17.0265 nQnC 1								# variable_mod_04 = -17.0265 nQnC 1
# variable_mod_05 = -18.0106 nE 1								# variable_mod_05 = -18.0106 nE 1								# variable_mod_05 = -18.0106 nE 1
variable_mod_06 = 125.047676 C 3								variable_mod_06 = 125.047676 C 3								variable_mod_06 = 125.047676 C 3
variable_mod_07 = 384.2525 * 1								variable_mod_07 = 538.1943 * 1								variable_mod_07 = 494.2448 * 1
# variable_mod_08 = 540.1943 S 3								# variable_mod_08 = 540.1943 S 3								# variable_mod_08 = 540.1943 S 3
# variable_mod_09 = 540.1943 K 3								# variable_mod_09 = 540.1943 K 3								# variable_mod_09 = 540.1943 K 3
# variable_mod_10 = 384.2525 C 3								# variable_mod_10 = 384.2525 C 3								# variable_mod_10 = 384.2525 C 3
# variable_mod_11 = 384.2525 S 3								# variable_mod_11 = 384.2525 S 3								# variable_mod_11 = 384.2525 S 3
# variable_mod_12 = 384.2525 K 3								# variable_mod_12 = 384.2525 K 3								# variable_mod_12 = 384.2525 K 3
# variable_mod_13 = 538.1943 C 3								# variable_mod_13 = 538.1943 C 3								# variable_mod_13 = 538.1943 C 3
# variable_mod_14 = 538.1943 S 3								# variable_mod_14 = 538.1943 S 3								# variable_mod_14 = 538.1943 S 3
# variable_mod_15 = 538.1943 K 3								# variable_mod_15 = 538.1943 K 3								# variable_mod_15 = 538.1943 K 3
# variable_mod_16 = 0.0 site_16 1								# variable_mod_16 = 0.0 site_16 1								# variable_mod_16 = 0.0 site_16 1
allow_multiple_variable_mods_on_residue = 0								allow_multiple_variable_mods_on_residue = 0								allow_multiple_variable_mods_on_residue = 0
max_variable_mods_per_peptide = 3			# Maximum total number of variable modifications per peptide.					max_variable_mods_per_peptide = 3			# Maximum total number of variable modifications per peptide.					max_variable_mods_per_peptide = 3			# Maximum total number of variable modifications per peptide.
max_variable_mods_combinations = 5000			# Maximum number of modified forms allowed for each peptide (up to 65534).					max_variable_mods_combinations = 5000			# Maximum number of modified forms allowed for each peptide (up to 65534).					max_variable_mods_combinations = 5000			# Maximum number of modified forms allowed for each peptide (up to 65534).
output_format = pepXML_pin			# File format of output files (tsv, pin, pepxml, tsv_pin, tsv_pepxml, pepxml_pin, or tsv_pepxml_pin).					output_format = pepXML_pin			# File format of output files (tsv, pin, pepxml, tsv_pin, tsv_pepxml, pepxml_pin, or tsv_pepxml_pin).					output_format = pepXML_pin			# File format of output files (tsv, pin, pepxml, tsv_pin, tsv_pepxml, pepxml_pin, or tsv_pepxml_pin).
output_report_topN = 1			# Reports top N PSMs per input spectrum.					output_report_topN = 1			# Reports top N PSMs per input spectrum.					output_report_topN = 1			# Reports top N PSMs per input spectrum.
output_max_expect = 50			# Suppresses reporting of PSM if top hit has expectation value greater than this threshold.					output_max_expect = 50			# Suppresses reporting of PSM if top hit has expectation value greater than this threshold.					output_max_expect = 50			# Suppresses reporting of PSM if top hit has expectation value greater than this threshold.
report_alternative_proteins = 0			# Report alternative proteins for peptides that are found in multiple proteins (0 for no, 1 for yes).					report_alternative_proteins = 0			# Report alternative proteins for peptides that are found in multiple proteins (0 for no, 1 for yes).					report_alternative_proteins = 0			# Report alternative proteins for peptides that are found in multiple proteins (0 for no, 1 for yes).
precursor_charge = 1 4			# Assumed range of potential precursor charge states. Only relevant when override_charge is set to 1.					precursor_charge = 1 4			# Assumed range of potential precursor charge states. Only relevant when override_charge is set to 1.					precursor_charge = 1 4			# Assumed range of potential precursor charge states. Only relevant when override_charge is set to 1.
override_charge = 0			# Ignores precursor charge and uses charge state specified in precursor_charge range (0 or 1).					override_charge = 0			# Ignores precursor charge and uses charge state specified in precursor_charge range (0 or 1).					override_charge = 0			# Ignores precursor charge and uses charge state specified in precursor_charge range (0 or 1).
digest_min_length = 7			# Minimum length of peptides to be generated during in-silico digestion.					digest_min_length = 7			# Minimum length of peptides to be generated during in-silico digestion.					digest_min_length = 7			# Minimum length of peptides to be generated during in-silico digestion.
digest_max_length = 50			# Maximum length of peptides to be generated during in-silico digestion.					digest_max_length = 50			# Maximum length of peptides to be generated during in-silico digestion.					digest_max_length = 50			# Maximum length of peptides to be generated during in-silico digestion.
digest_mass_range = 500.0 5000.0			# Mass range of peptides to be generated during in-silico digestion in Daltons.					digest_mass_range = 500.0 5000.0			# Mass range of peptides to be generated during in-silico digestion in Daltons.					digest_mass_range = 500.0 5000.0			# Mass range of peptides to be generated during in-silico digestion in Daltons.
max_fragment_charge = 2			# Maximum charge state for theoretical fragments to match (1-4).					max_fragment_charge = 2			# Maximum charge state for theoretical fragments to match (1-4).					max_fragment_charge = 2			# Maximum charge state for theoretical fragments to match (1-4).
track_zero_topN = 0			# Track top N unmodified peptide results separately from main results internally for boosting features.					track_zero_topN = 0			# Track top N unmodified peptide results separately from main results internally for boosting features.					track_zero_topN = 0			# Track top N unmodified peptide results separately from main results internally for boosting features.
zero_bin_accept_expect = 0			# Ranks a zero-bin hit above all non-zero-bin hit if it has expectation less than this value.					zero_bin_accept_expect = 0			# Ranks a zero-bin hit above all non-zero-bin hit if it has expectation less than this value.					zero_bin_accept_expect = 0			# Ranks a zero-bin hit above all non-zero-bin hit if it has expectation less than this value.
zero_bin_mult_expect = 1			# Multiplies expect value of PSMs in the zero-bin during results ordering (set to less than 1 for boosting).					zero_bin_mult_expect = 1			# Multiplies expect value of PSMs in the zero-bin during results ordering (set to less than 1 for boosting).					zero_bin_mult_expect = 1			# Multiplies expect value of PSMs in the zero-bin during results ordering (set to less than 1 for boosting).
check_spectral_files = 1			# Checking spectral files before searching.					check_spectral_files = 1			# Checking spectral files before searching.					check_spectral_files = 1			# Checking spectral files before searching.
minimum_peaks = 15			# Minimum number of peaks in experimental spectrum for matching.					minimum_peaks = 15			# Minimum number of peaks in experimental spectrum for matching.					minimum_peaks = 15			# Minimum number of peaks in experimental spectrum for matching.
use_topN_peaks = 150			# Pre-process experimental spectrum to only use top N peaks.					use_topN_peaks = 150			# Pre-process experimental spectrum to only use top N peaks.					use_topN_peaks = 150			# Pre-process experimental spectrum to only use top N peaks.
min_fragments_modelling = 2			# Minimum number of matched peaks in PSM for inclusion in statistical modeling.					min_fragments_modelling = 2			# Minimum number of matched peaks in PSM for inclusion in statistical modeling.					min_fragments_modelling = 2			# Minimum number of matched peaks in PSM for inclusion in statistical modeling.
min_matched_fragments = 4			# Minimum number of matched peaks for PSM to be reported.					min_matched_fragments = 4			# Minimum number of matched peaks for PSM to be reported.					min_matched_fragments = 4			# Minimum number of matched peaks for PSM to be reported.
min_sequence_matches = 2			# [nglycan/labile search_mode only] Minimum number of sequence-specific (not Y) ions to record a match.					min_sequence_matches = 2			# [nglycan/labile search_mode only] Minimum number of sequence-specific (not Y) ions to record a match.					min_sequence_matches = 2			# [nglycan/labile search_mode only] Minimum number of sequence-specific (not Y) ions to record a match.
minimum_ratio = 0.01			# Filters out all peaks in experimental spectrum less intense than this multiple of the base peak intensity.					minimum_ratio = 0.01			# Filters out all peaks in experimental spectrum less intense than this multiple of the base peak intensity.					minimum_ratio = 0.01			# Filters out all peaks in experimental spectrum less intense than this multiple of the base peak intensity.
clear_mz_range = 0.0 0.0			# Removes peaks in this m/z range prior to matching.					clear_mz_range = 0.0 0.0			# Removes peaks in this m/z range prior to matching.					clear_mz_range = 0.0 0.0			# Removes peaks in this m/z range prior to matching.
add_Cterm_peptide = 0.0								add_Cterm_peptide = 0.0								add_Cterm_peptide = 0.0
add_Nterm_peptide = 0.0								add_Nterm_peptide = 0.0								add_Nterm_peptide = 0.0
add_Cterm_protein = 0.0								add_Cterm_protein = 0.0								add_Cterm_protein = 0.0
add_Nterm_protein = 0.0								add_Nterm_protein = 0.0								add_Nterm_protein = 0.0
add_G_glycine = 0.0								add_G_glycine = 0.0								add_G_glycine = 0.0
add_A_alanine = 0.0								add_A_alanine = 0.0								add_A_alanine = 0.0
add_S_serine = 0.0								add_S_serine = 0.0								add_S_serine = 0.0
add_P_proline = 0.0								add_P_proline = 0.0								add_P_proline = 0.0
add_V_valine = 0.0								add_V_valine = 0.0								add_V_valine = 0.0
add_T_threonine = 0.0								add_T_threonine = 0.0								add_T_threonine = 0.0
# add_C_cysteine = 125.047676								# add_C_cysteine = 125.047676								# add_C_cysteine = 125.047676
add_L_leucine = 0.0								add_L_leucine = 0.0								add_L_leucine = 0.0
add_I_isoleucine = 0.0								add_I_isoleucine = 0.0								add_I_isoleucine = 0.0
add_N_asparagine = 0.0								add_N_asparagine = 0.0								add_N_asparagine = 0.0
add_D_aspartic_acid = 0.0								add_D_aspartic_acid = 0.0								add_D_aspartic_acid = 0.0
add_Q_glutamine = 0.0								add_Q_glutamine = 0.0								add_Q_glutamine = 0.0
add_K_lysine = 0.0								add_K_lysine = 0.0								add_K_lysine = 0.0
add_E_glutamic_acid = 0.0								add_E_glutamic_acid = 0.0								add_E_glutamic_acid = 0.0
add_M_methionine = 0.0								add_M_methionine = 0.0								add_M_methionine = 0.0
add_H_histidine = 0.0								add_H_histidine = 0.0								add_H_histidine = 0.0
add_F_phenylalanine = 0.0								add_F_phenylalanine = 0.0								add_F_phenylalanine = 0.0
add_R_arginine = 0.0								add_R_arginine = 0.0								add_R_arginine = 0.0
add_Y_tyrosine = 0.0								add_Y_tyrosine = 0.0								add_Y_tyrosine = 0.0
add_W_tryptophan = 0.0								add_W_tryptophan = 0.0								add_W_tryptophan = 0.0
add_B_user_amino_acid = 0.0								add_B_user_amino_acid = 0.0								add_B_user_amino_acid = 0.0
add_J_user_amino_acid = 0.0								add_J_user_amino_acid = 0.0								add_J_user_amino_acid = 0.0
add_O_user_amino_acid = 0.0								add_O_user_amino_acid = 0.0								add_O_user_amino_acid = 0.0
add_U_user_amino_acid = 0.0								add_U_user_amino_acid = 0.0								add_U_user_amino_acid = 0.0
add_X_user_amino_acid = 0.0								add_X_user_amino_acid = 0.0								add_X_user_amino_acid = 0.0
add_Z_user_amino_acid = 0.0								add_Z_user_amino_acid = 0.0								add_Z_user_amino_acid = 0.0
